# Supplementary material
Source: PubMed Central journal article supplement (PMC6713593)

Supporting Information

©Wiley-VCH 2016

69451 Weinheim, Germany

**Synthesis of Homoallylic Alcohols with Acyclic Quaternary Centers via Co<sup>III</sup>-Catalyzed Three-Component C–H Bond Addition to Internally Substituted Dienes and Carbonyls**

Sun Dongbang,<sup>†</sup> Zican Shen,<sup>†</sup> and Jonathan A. Ellman\*

**Abstract:** An efficient Co<sup>III</sup>-catalyzed three-component strategy to prepare homoallylic alcohols containing acyclic quaternary centers is disclosed. This transformation enables introduction of two C–C  $\sigma$  bonds via C–H bond activation and sequential addition to internally substituted dienes and a wide range of aldehydes and activated ketones. Isoprene and other internally substituted dienes are effective inputs, with the reaction proceeding with high diastereoselectivity for those substrate combinations that result in more than one stereogenic center. Moreover, the opposite relative stereochemistry can be achieved by employed 1,2-disubstituted dienes. A mechanism for the transformation is proposed based upon the relative stereochemistry of the products and studies with isotopically labeled starting materials.

DOI: 10.1002/anie.2016XXXXX

**Table of Contents**

|                                                                                             |     |
|---------------------------------------------------------------------------------------------|-----|
| <b>I. Supplemental Optimization Table S1</b>                                                | S3  |
| <b>II. General Information</b>                                                              | S4  |
| <b>III. Preparation of Starting Materials</b>                                               | S4  |
| <b>IV. Procedures for Co(III)-Catalyzed Three-Component Synthesis</b>                       | S4  |
| <b>V. Mechanism Experiments</b>                                                             | S15 |
| A. Reversibility of C–H bond activation step                                                | S15 |
| B. Investigation of 1,4-Deuterium Migration                                                 | S17 |
| C. KIE experiments                                                                          | S18 |
| <b>VI. 3,5-Dinitrobenzoylated Derivatives of 6a and 8a</b>                                  | S24 |
| <b>VII. X-Ray Crystallographic Data for 3,5-dinitrobenzoylated derivatives of 6a and 8a</b> | S25 |
| <b>VIII. Author Contributions</b>                                                           | S63 |
| <b>IX. References</b>                                                                       | S63 |
| <b>X. NMR Spectra</b>                                                                       | S64 |

## SUPPORTING INFORMATION

## I. Supplemental Optimization Table S1

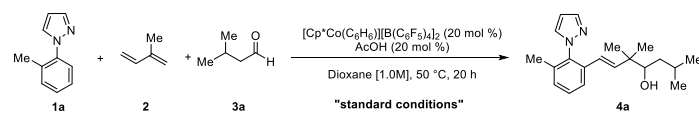

| Entry <sup>[a]</sup> | Variation from the standard conditions                                                                                                                | Recovered <b>1a</b> <sup>[b]</sup> | Yield <b>4a</b> <sup>[b]</sup> |
|----------------------|-------------------------------------------------------------------------------------------------------------------------------------------------------|------------------------------------|--------------------------------|
| 1                    | None                                                                                                                                                  | 30                                 | 65 (62) <sup>[c]</sup>         |
| 2                    | No catalyst                                                                                                                                           | 98                                 | 0                              |
| 3                    | No AcOH                                                                                                                                               | 55                                 | 34                             |
| 4                    | LiOAc (20 mol%) instead of AcOH                                                                                                                       | 38                                 | 57                             |
| 5                    | PivOH (20 mol%) instead of AcOH                                                                                                                       | 48                                 | 46                             |
| 6                    | Performed at 23 °C                                                                                                                                    | 76                                 | 20                             |
| 7                    | Performed at 70 °C                                                                                                                                    | 28                                 | 60                             |
| 8                    | Performed at [0.4 M]                                                                                                                                  | 39                                 | 56                             |
| 9                    | In DCE                                                                                                                                                | 35                                 | 55                             |
| 10                   | In toluene                                                                                                                                            | 32                                 | 61                             |
| 11                   | Performed in toluene at 70 °C                                                                                                                         | 11                                 | 72 (71) <sup>[c]</sup>         |
| 12                   | $[\text{Cp}^*\text{Co}(\text{C}_6\text{H}_6)]\text{PF}_6_2$ instead of $[\text{Cp}^*\text{Co}(\text{C}_6\text{H}_6)]\text{B}(\text{C}_6\text{F}_5)_2$ | 87                                 | 0                              |
| 13                   | $[\text{Cp}^*\text{Co}(\text{MeCN})_3]\text{SbF}_6_2$ instead of $[\text{Cp}^*\text{Co}(\text{C}_6\text{H}_6)]\text{B}(\text{C}_6\text{F}_5)_2$       | 83                                 | 17                             |
| 14                   | $[\text{Cp}^*\text{Rh}(\text{MeCN})_3]\text{SbF}_6_2$ instead of $[\text{Cp}^*\text{Co}(\text{C}_6\text{H}_6)]\text{B}(\text{C}_6\text{F}_5)_2$       | 77                                 | 14                             |

[a] Conditions: **1a** (0.2 mmol), **2a** (0.8 mmol), and **3a** (0.6 mmol) using above parameters. [b] Yields determined by crude <sup>1</sup>H NMR analysis relative to 1,3,5 trimethoxybenzene as an external standard. [c] Isolated yield from silica gel chromatography.

## SUPPORTING INFORMATION

## II. General Information

Unless otherwise noted, all Co(III)/Rh(III)-catalyzed reactions were set up in a N<sub>2</sub> filled glovebox, using glassware that was oven-dried (150 °C) and evacuated while hot prior to use. Unless otherwise indicated, all reactions for substrate preparation were carried out on the benchtop under a N<sub>2</sub> atmosphere. Solvents were sparged with argon and purified by elution through a column of activated alumina under argon before use and were stored in a N<sub>2</sub> filled glovebox in presence of activated 3 Å molecular sieves (molecular sieves were dried at 200 °C overnight under vacuum). Unless otherwise noted, all reagents were purchased from commercial sources and used without further purification. Microwave vials and caps were purchased from Biotage with part numbers 351521 and 352298 respectively. Product purification was performed by either flash column chromatography with SiliaFlash® P60 (230-400 mesh) silica gel, reverse phase chromatography with a Teledyne Isco automated chromatography system using C-18 gold columns, or preparative thin-layer chromatography with plates from Analtech (1 mm SiO<sub>2</sub>, 20 x 20 cm). <sup>1</sup>H, <sup>13</sup>C, <sup>19</sup>F, <sup>31</sup>P NMR spectra were recorded on either a 400, 500, or 600 MHz instrument. Data are reported in the following format: chemical shift in ppm, multiplicity (s = singlet, d = doublet, t = triplet, q = quartet, bs = broad singlet, m = multiplet, dd = doublet of doublets, etc.), coupling constant *J* in Hz, and integration. CDCl<sub>3</sub> was used as received. NMR chemical shifts are reported in ppm relative to CDCl<sub>3</sub> (7.26 ppm <sup>1</sup>H and 77.2 ppm <sup>13</sup>C). Partial IR spectra are reported. Melting points are reported uncorrected. High-resolution mass spectra (HRMS) were obtained using electrospray ionization (ESI) on a time of flight (TOF) mass spectrometer.

## III. Preparation of Starting Materials

## Catalysts:

[Cp\*<sup>+</sup>RhCl<sub>2</sub>]<sub>2</sub><sup>[1]</sup>, [Cp\*<sup>+</sup>Co(C<sub>6</sub>H<sub>6</sub>)]<sub>2</sub>[B(C<sub>6</sub>F<sub>5</sub>)<sub>4</sub>]<sub>2</sub><sup>[2]</sup>, [Cp\*<sup>+</sup>Co(C<sub>6</sub>H<sub>6</sub>)]<sub>2</sub>[PF<sub>6</sub>]<sub>2</sub><sup>[3]</sup>, [Cp\*<sup>+</sup>Co(MeCN)<sub>3</sub>][SbF<sub>6</sub>]<sub>2</sub><sup>[4]</sup>, [Cp\*<sup>+</sup>Rh(MeCN)<sub>3</sub>][SbF<sub>6</sub>]<sub>2</sub><sup>[5]</sup> were each synthesized according to literature procedures.

## Substrates:

1-(*m*-Tolyl)-1*H*-pyrazole<sup>[6]</sup>, 1-(*o*-tolyl)-1*H*-pyrazole<sup>[6]</sup>, 2-(*m*-tolyl)pyridine<sup>[7]</sup>, phenyl(pyrrolidin-1-yl)methanone<sup>[8]</sup>, *N*-isopropylbenzamide<sup>[9]</sup>, 2-methyl-3,4-dihydroisoquinolin-1(2*H*)-one<sup>[10]</sup>, 1-methylindoline-2,3-dione<sup>[11]</sup>, 3-methyleneoct-1-ene<sup>[12]</sup>, 2-phenyl-1,3-butadiene<sup>[13]</sup>, 3-methyl-1,3-hexadiene<sup>[14]</sup>, 6-chloro-1-methylindoline-2,3-dione<sup>[15]</sup>, and indantrione<sup>[16]</sup> were each synthesized according to literature procedures. 5-Methyl-3-methylene-hex-1-ene<sup>[14]</sup> was made according to the literature procedure and the characterization data matched those reported in the literature.<sup>[17]</sup> Isoprene was purified by washing with dilute NaOH and water prior to fractional distillation<sup>[18]</sup> and was stored in a freezer in a glove box. 3-Methyleneoct-1-ene, 2-phenyl-1,3-butadiene, 3-methyl 1,3-hexadiene, and 5-methyl-3-methylene-hex-1-ene were stored in a microwave vial under N<sub>2</sub> and stored in a -78 °C freezer. All other substrates were purchased from commercial sources and used without further purification.

## IV. Procedures for Co(III)-Catalyzed Three-Component Synthesis

## General Procedure A for C–H Bond Substrate, Aldehyde and Ketone Scope

In a N<sub>2</sub>-filled glove box, a 2.0–5.0 mL Biotage® microwave vial with a triangular stir bar (1 x 0.5 cm) was charged with the indicated C–H bond partner (0.200 mmol, 1.00 equiv) and [Cp\*<sup>+</sup>Co(C<sub>6</sub>H<sub>6</sub>)]<sub>2</sub>[B(C<sub>6</sub>F<sub>5</sub>)<sub>4</sub>]<sub>2</sub> (65.2 mg, 0.0400 mmol, 0.200 equiv). Following this, 67 μL of a [0.6 M] stock solution of acetic acid in 1,4-dioxane followed by 133 μL of 1,4-dioxane were added. The corresponding aldehyde or ketone (0.600 mmol, 3.00 equiv) and isoprene (0.800 mmol, 4.00 equiv) were added successively. The reaction vial was then sealed and taken outside the glove box. The reaction mixture was stirred in a preheated oil bath at 50 °C for 20 h. The reaction vial was then cooled to room temperature and uncapped. The reaction was quenched with saturated NaHCO<sub>3</sub> (10 mL), and the resulting mixture was then extracted with ethyl acetate (5 x 3 mL). The organic layers were combined and dried over Na<sub>2</sub>SO<sub>4</sub>. After filtering the mixture through a celite plug using ethyl acetate as the eluent, the resulting mixture was then concentrated and purified by the corresponding chromatographic method to afford the desired product.

## General Procedure B for C–H Bond Substrate, Aldehyde and Ketone Scope

In a N<sub>2</sub>-filled glove box, a 2.0–5.0 mL Biotage® microwave vial with a triangular stir bar (1 x 0.5 cm) was charged with the indicated C–H bond partner (0.200 mmol, 1.00 equiv) and [Cp\*<sup>+</sup>Co(C<sub>6</sub>H<sub>6</sub>)]<sub>2</sub>[B(C<sub>6</sub>F<sub>5</sub>)<sub>4</sub>]<sub>2</sub> (65.2 mg, 0.0400 mmol, 0.200 equiv). Following this, 67 μL of a [0.6 M] stock solution of acetic acid in 1,4-dioxane followed by 133 μL of 1,4-dioxane were added. The corresponding aldehyde or ketone (0.600 mmol, 3.00 equiv) and corresponding diene (0.400 mmol, 2.00 equiv) were added successively. The reaction vial was then sealed and taken outside the glove box. The reaction mixture was stirred in a preheated oil bath at 50 °C for 20 h. The reaction vial was then cooled to room temperature and uncapped. The reaction was quenched with saturated NaHCO<sub>3</sub> (5 mL), and the resulting mixture was then extracted with ethyl acetate (5 x 3 mL). The organic layers were combined and dried over Na<sub>2</sub>SO<sub>4</sub>. After filtering the mixture through a celite plug using ethyl acetate as the eluent, the resulting mixture was then concentrated and purified by the corresponding chromatographic method to afford the desired product.

## General Procedure C for C–H Bond Substrate, and Aldehyde Scope

In a N<sub>2</sub>-filled glove box, a 2.0–5.0 mL Biotage® microwave vial with a triangular stir bar (1 x 0.5 cm) was charged with the indicated C–H bond partner (0.200 mmol, 1.00 equiv) and [Cp\*<sup>+</sup>Co(C<sub>6</sub>H<sub>6</sub>)]<sub>2</sub>[B(C<sub>6</sub>F<sub>5</sub>)<sub>4</sub>]<sub>2</sub> (65.2 mg, 0.0400 mmol, 0.200 equiv). Following this, 67 μL of

## SUPPORTING INFORMATION

a [0.6 M] stock solution of acetic acid in 1,4-dioxane followed by 133  $\mu\text{L}$  of 1,4-dioxane were added. The corresponding aldehyde (0.600 mmol, 3.00 equiv) and corresponding diene (0.400 mmol, 2.00 equiv) were added successively. The reaction vial was then sealed and taken outside the glove box. The reaction mixture was stirred in a preheated oil bath at 70  $^{\circ}\text{C}$  for 40 h. The reaction vial was then cooled to room temperature and uncapped. The reaction was quenched with saturated  $\text{NaHCO}_3$  (5 mL), and the resulting mixture was then extracted with ethyl acetate (5 x 3 mL). The organic layers were combined and dried over  $\text{Na}_2\text{SO}_4$ . After filtering the mixture through a celite plug using ethyl acetate as the eluent, the resulting mixture was then concentrated and purified by the corresponding chromatographic method to afford the desired product.

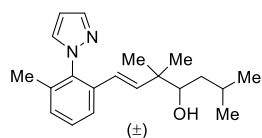

**(E)-3,3,6-Trimethyl-1-(3-methyl-2-(1H-pyrazol-1-yl)phenyl)hept-1-en-4-ol (4a):** The general procedure A was modified using 1-*o*-tolyl-1*H*-pyrazole (31.6 mg, 0.200 mmol, 1.00 equiv) and 3-methylbutanal (51.7 mg, 0.600 mmol, 3.00 equiv) in toluene at 70  $^{\circ}\text{C}$ . Purification by silica gel chromatography (40% ethyl acetate in hexane) provided the product **4a** (38.7 mg, 71% yield) as a colorless oil. IR (neat): 3380, 2956, 2868, 1517, 1467, 1393, 1366  $\text{cm}^{-1}$ .  $^1\text{H}$  NMR (500 MHz,  $\text{CDCl}_3$ ):  $\delta$  7.74 (m, 1H), 7.45 (m, 1H), 7.39 (d,  $J$  = 7.8 Hz, 1H), 7.30 (t,  $J$  = 7.7 Hz, 1H), 7.18 (d,  $J$  = 7.5 Hz, 1H), 6.45 (m, 1H), 5.98 (d,  $J$  = 16.3 Hz, 1H), 5.73 (d,  $J$  = 16.3 Hz, 1H), 3.35-3.24 (m, 1H), 2.04 (s, 3H), 1.79-1.73 (m, 1H), 1.57-1.35 (bs, 1H), 1.23-1.12 (m, 2H), 0.94-0.91 (m, 9H), 0.86 (d,  $J$  = 6.5 Hz, 3H).  $^{13}\text{C}$  NMR (126 MHz,  $\text{CDCl}_3$ ):  $\delta$  140.5, 140.2, 137.6, 136.5, 136.2, 131.4, 129.2, 129.1, 129.0, 123.9, 106.0, 76.3, 41.3, 40.7, 24.9, 24.1, 23.4, 22.4, 21.3, 17.3. HRMS (ESI/[ $\text{M}+\text{H}$ ] $^+$ ) calcd. for  $\text{C}_{20}\text{H}_{29}\text{N}_2\text{O}^+$ , 313.2280. Found [ $\text{M}+\text{H}$ ] $^+$ , 313.2274.

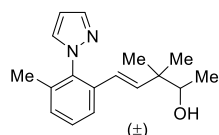

**(E)-3,3-Dimethyl-5-(3-methyl-2-(1H-pyrazol-1-yl)phenyl)pent-4-en-2-ol (4b):** The general procedure A was followed using 1-*o*-tolyl-1*H*-pyrazole (31.6 mg, 0.200 mmol, 1.00 equiv) and acetaldehyde (26.4 mg, 0.600 mmol, 3.00 equiv). Purification by silica gel chromatography (40% ethyl acetate in hexane) provided the product **4b** (54.1 mg, 74% yield) as a colorless oil. IR (neat): 3360, 2967, 1647, 1594, 1515, 1469, 1392  $\text{cm}^{-1}$ .  $^1\text{H}$  NMR (500 MHz,  $\text{CDCl}_3$ ):  $\delta$  7.74 (m, 1H), 7.45 (m, 1H), 7.39 (d,  $J$  = 7.6 Hz, 1H), 7.29 (t,  $J$  = 7.5 Hz, 1H), 7.17 (d,  $J$  = 7.2 Hz, 1H), 6.45 (m, 1H), 5.99 (d,  $J$  = 16.3 Hz, 1H), 5.74 (d,  $J$  = 16.3 Hz, 1H), 3.44 (m, 1H), 2.04 (s, 3H), 1.76-1.72 (bs, 1H), 1.05 (d,  $J$  = 5 Hz, 3H), 0.93 (s, 3H), 0.90 (s, 3H).  $^{13}\text{C}$  NMR (126 MHz,  $\text{CDCl}_3$ ):  $\delta$  140.3, 140.2, 136.4, 136.2, 131.4, 129.2, 129.0, 124.0, 123.94, 123.90, 106.0, 74.2, 41.4, 23.5, 21.8, 17.6, 17.3. HRMS (ESI/[ $\text{M}+\text{H}$ ] $^+$ ) calcd. for  $\text{C}_{17}\text{H}_{23}\text{N}_2\text{O}^+$ , 271.1810. Found [ $\text{M}+\text{H}$ ] $^+$ , 271.1802.

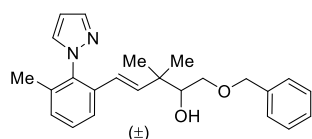

**(E)-1-(Benzyloxy)-3,3-dimethyl-5-(3-methyl-2-(1H-pyrazol-1-yl)phenyl)pent-4-en-2-ol (4c):** The general procedure A was followed using 1-*o*-tolyl-1*H*-pyrazole (31.6 mg, 0.200 mmol, 1.00 equiv) and 2-(benzyloxy)acetaldehyde (91.1 mg, 0.600 mmol, 3.00 equiv). Purification by silica gel chromatography (40% ethyl acetate in hexane) provided the product **4c** (64.0 mg, 85% yield) as a colorless oil. IR (neat): 3318, 2964, 1719, 1516, 1470, 1393  $\text{cm}^{-1}$ .  $^1\text{H}$  NMR (500 MHz,  $\text{CDCl}_3$ ):  $\delta$  7.74 (d,  $J$  = 1.5 Hz, 1H), 7.40-7.37 (m, 2H), 7.34-7.26 (m, 6H), 7.17 (d,  $J$  = 7.3 Hz, 1H), 6.43 (t,  $J$  = 2.1 Hz, 1H), 6.13 (d,  $J$  = 16.3 Hz, 1H), 5.70 (d,  $J$  = 16.3 Hz, 1H), 4.51 (s, 2H), 3.56-3.51 (m, 2H), 3.31 (m, 1H), 2.59-2.43 (bs, 1H), 2.04 (s, 3H), 0.99 (s, 3H), 0.97 (s, 3H).  $^{13}\text{C}$  NMR (126 MHz,  $\text{CDCl}_3$ ):  $\delta$  140.1, 139.6, 138.0, 137.6, 136.34, 136.28, 131.5, 129.2, 129.0, 128.4, 127.74, 127.70, 123.7, 122.9, 106.0, 76.8, 73.3, 71.6, 39.7, 23.9, 23.0, 17.3. HRMS (ESI/[ $\text{M}+\text{H}$ ] $^+$ ) calcd. for  $\text{C}_{24}\text{H}_{29}\text{N}_2\text{O}_2^+$ , 377.2229. Found [ $\text{M}+\text{H}$ ] $^+$ , 377.2238.

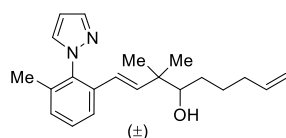

**(E)-3,3-Dimethyl-1-(3-methyl-2-(1H-pyrazol-1-yl)phenyl)nona-1,8-dien-4-ol (4d):** The general procedure A was followed using 1-*o*-tolyl-1*H*-pyrazole (31.6 mg, 0.200 mmol, 1.00 equiv) and (*E*)-hex-4-enal (58.9 mg, 0.600 mmol, 3.00 equiv). Purification by silica gel chromatography (40% ethyl acetate in hexane) provided the product **4d** (27.9 mg, 43% yield) as a colorless oil. IR (neat): 3343, 2929, 1641, 1517, 1469, 1393  $\text{cm}^{-1}$ .  $^1\text{H}$  NMR (500 MHz,  $\text{CDCl}_3$ ):  $\delta$  7.74 (m, 1H), 7.45 (d,  $J$  = 2.0 Hz, 1H), 7.38 (d,  $J$  = 7.7 Hz, 1H), 7.29 (t,  $J$  = 7.7 Hz, 1H), 7.18 (d,  $J$  = 7.5 Hz, 1H), 6.45 (m, 1H), 5.98 (d,  $J$  = 16.3 Hz, 1H), 5.83-5.77 (m, 1H), 5.73 (d,  $J$  = 16.3 Hz, 1H), 5.00 (d,  $J$  = 17.1 Hz, 1H), 4.94 (d,  $J$  = 10.1 Hz, 1H), 3.20 (m, 1H), 2.04 (s, 3H), 2.07-1.93 (m, 2H), 1.65-1.56 (m, 2H), 1.46 (dt,  $J$  = 14.2, 8.2 Hz, 1H), 1.36 (m, 1H), 1.22-1.14 (m, 1H), 0.94 (s, 3H), 0.91 (s, 3H).  $^{13}\text{C}$  NMR (126 MHz,  $\text{CDCl}_3$ ):  $\delta$  140.5, 140.2, 138.8, 137.6, 136.4, 136.2, 131.4, 129.2, 129.0, 123.88, 123.87, 114.5, 106.0, 78.4, 41.5, 33.7, 31.0, 26.2, 23.3, 22.5, 17.3. HRMS (ESI/[ $\text{M}+\text{H}$ ] $^+$ ) calcd. for  $\text{C}_{21}\text{H}_{29}\text{N}_2\text{O}^+$ , 325.2280. Found [ $\text{M}+\text{H}$ ] $^+$ , 325.2299.

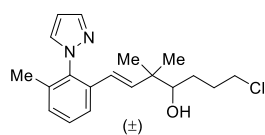

**(E)-7-Chloro-3,3-dimethyl-1-(3-methyl-2-(1H-pyrazol-1-yl)phenyl)hept-1-en-4-ol (4e):** The general procedure A was followed using 1-*o*-tolyl-1*H*-pyrazole (31.6 mg, 0.200 mmol, 1.00 equiv) and 4-chlorobutanal (63.9 mg, 0.600 mmol, 3.00 equiv). Purification by silica gel chromatography (30% ethyl acetate in hexane) provided the product **4e** (34.0 mg, 51% yield) as a colorless oil. IR (neat): 3343, 2961, 2867, 1648, 1516, 1468, 1393  $\text{cm}^{-1}$ .  $^1\text{H}$  NMR (500 MHz,  $\text{CDCl}_3$ ):  $\delta$  7.74 (m, 1H), 7.46 (d,  $J$  = 2.1 Hz, 1H), 7.38 (d,  $J$  = 7.7 Hz, 1H), 7.30 (t,  $J$  = 7.7 Hz, 1H), 7.18 (d,  $J$  = 7.5 Hz, 1H), 6.46 (m, 1H), 5.95 (d,  $J$  = 16.3 Hz, 1H), 5.74 (d,  $J$  = 16.3 Hz, 1H), 3.62-3.49 (m, 2H), 3.20 (m, 1H), 2.04 (s, 3H), 2.04-1.91 (m, 1H), 1.78-1.72 (m, 1H), 1.68-1.62 (m, 1H), 1.30-1.24 (m, 1H), 0.95 (s, 3H), 0.93 (s, 3H).  $^{13}\text{C}$  NMR (126 MHz,  $\text{CDCl}_3$ ):  $\delta$  140.20, 140.17, 136.4, 136.2, 131.5, 129.3, 129.1, 124.28, 124.25, 124.0, 106.1, 77.8, 45.3, 41.5, 30.0, 28.7, 23.4, 22.3, 17.3. HRMS (ESI/[ $\text{M}+\text{H}$ ] $^+$ ) calcd. for  $\text{C}_{19}\text{H}_{26}\text{ClN}_2\text{O}^+$ , 333.1734. Found [ $\text{M}+\text{H}$ ] $^+$ , 333.1751.

## SUPPORTING INFORMATION

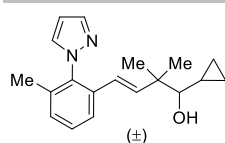

**(E)-1-Cyclopropyl-2,2-dimethyl-4-(3-methyl-2-(1H-pyrazol-1-yl)phenyl)but-3-en-1-ol (4f):** The general procedure A was modified using 1-*o*-tolyl-1H-pyrazole (31.6 mg, 0.200 mmol, 1.00 equiv) and cyclopropanecarbaldehyde (42.1 mg, 0.600 mmol, 3.00 equiv) in toluene at 70 °C. Purification by silica gel chromatography (30% ethyl acetate in hexane) provided the product **4f** (32.2 mg, 62% yield) as a colorless oil. IR (neat): 3354, 2960, 1647, 1594, 1515, 1468, 1393 cm<sup>-1</sup>. <sup>1</sup>H NMR (500 MHz, CDCl<sub>3</sub>): δ 7.74 (m, 1H), 7.45 (m, 1H), 7.42 (d, *J* = 7.8 Hz, 1H), 7.29 (t, *J* = 7.7 Hz, 1H), 7.17 (d, *J* = 7.5 Hz, 1H), 6.45 (m, 1H), 6.18 (d, *J* = 16.3 Hz, 1H), 5.75 (d, *J* = 16.3 Hz, 1H), 2.54 (d, *J* = 8.8 Hz, 1H), 2.04 (s, 3H), 1.67-1.57 (bs, 1H), 1.03 (s, 3H), 1.00 (s, 3H), 0.86-0.81 (m, 1H), 0.56-0.53 (m, 1H), 0.45-0.42 (m, 1H), 0.26-0.21 (m, 2H). <sup>13</sup>C NMR (126 MHz, CDCl<sub>3</sub>): δ 140.5, 140.2, 137.6, 136.6, 136.2, 131.5, 129.1, 129.0, 123.7, 123.3, 105.9, 83.2, 42.2, 24.3, 22.7, 17.3, 13.6, 4.9, 1.7. HRMS (ESI/[M+H]<sup>+</sup>) calcd. for C<sub>19</sub>H<sub>25</sub>N<sub>2</sub>O<sup>+</sup>, 297.1967. Found [M+H]<sup>+</sup>, 297.1995.

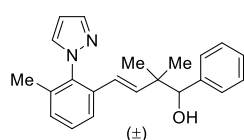

**(E)-2,2-Dimethyl-4-(3-methyl-2-(1H-pyrazol-1-yl)phenyl)-1-phenylbut-3-en-1-ol (4g):** The general procedure A was followed using 1-*o*-tolyl-1H-pyrazole (31.6 mg, 0.200 mmol, 1.00 equiv) and benzaldehyde (63.7 mg, 0.600 mmol, 3.00 equiv). Purification by silica gel chromatography (40% ethyl acetate in hexane) provided the product **4g** (40.6 mg, 61% yield) as a colorless oil. IR (neat): 3352, 2969, 1703, 1595, 1516, 1469, 1393 cm<sup>-1</sup>. <sup>1</sup>H NMR (500 MHz, CDCl<sub>3</sub>): δ 7.72 (m, 1H), 7.40 (d, *J* = 7.7 Hz, 1H), 7.37 (m, 1H), 7.32-7.23 (m, 6H), 7.19 (d, *J* = 7.5 Hz, 1H), 6.40 (m, 1H), 6.09 (d, *J* = 16.3 Hz, 1H), 5.70 (d, *J* = 16.3 Hz, 1H), 4.35 (s, 1H), 2.44-2.23 (bs, 1H), 2.05 (s, 3H), 0.96 (s, 3H), 0.87 (s, 3H). <sup>13</sup>C NMR (126 MHz, CDCl<sub>3</sub>): δ 141.0, 140.2, 140.0, 137.6, 136.3, 136.1, 131.6, 129.3, 129.0, 127.7, 127.5, 127.3, 124.1, 123.8, 106.0, 81.0, 42.0, 24.4, 21.9, 17.4. HRMS (ESI/[M+H]<sup>+</sup>) calcd. for C<sub>22</sub>H<sub>25</sub>N<sub>2</sub>O<sup>+</sup>, 333.1967. Found [M+H]<sup>+</sup>, 333.1990.

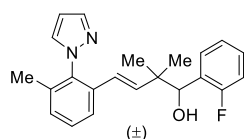

**(E)-1-(2-Fluorophenyl)-2,2-dimethyl-4-(3-methyl-2-(1H-pyrazol-1-yl)phenyl)but-3-en-1-ol (4h):** The general procedure A was followed using 1-*o*-tolyl-1H-pyrazole (31.6 mg, 0.200 mmol, 1.00 equiv) and 2-fluorobenzaldehyde (74.5 mg, 0.600 mmol, 3.00 equiv). Purification by silica gel chromatography (40% ethyl acetate in hexane) provided the product **4h** (52.6 mg, 75% yield) as a yellow oil. IR (neat): 3322, 2967, 1587, 1470, 1393, 1221 cm<sup>-1</sup>. <sup>1</sup>H NMR (500 MHz, CDCl<sub>3</sub>): δ 7.71 (m, 1H), 7.41 (d, *J* = 7.7 Hz, 1H), 7.37-7.35 (m, 2H), 7.31 (t, *J* = 7.7 Hz, 1H), 7.22-7.18 (m, 2H), 7.10 (t, *J* = 7.5 Hz, 1H), 6.97 (t, *J* = 7.5 Hz, 1H), 6.40 (m, 1H), 6.11 (d, *J* = 16.3 Hz, 1H), 5.69 (d, *J* = 16.2 Hz, 1H), 4.78 (s, 1H), 2.54-2.29 (bs, 1H), 2.05 (s, 3H), 0.98 (s, 3H), 0.90 (s, 3H). <sup>13</sup>C NMR (126 MHz, CDCl<sub>3</sub>): δ 160.0 (d, *J* = 245.0 Hz), 140.2, 139.5, 136.3, 136.0, 131.6, 129.3, 129.2 (d, *J* = 3.1 Hz), 129.1, 128.6 (d, *J* = 8.4 Hz), 128.4 (d, *J* = 13.0 Hz), 124.3 (d, *J* = 4.9 Hz), 124.2, 123.9, 123.6 (d, *J* = 3.2 Hz), 114.8 (d, *J* = 23.0 Hz), 106.0, 73.2, 42.5, 23.8, 21.7, 17.4. <sup>19</sup>F NMR (470 MHz, CDCl<sub>3</sub>): δ -115.7. HRMS (ESI/[M+H]<sup>+</sup>) calcd. for C<sub>22</sub>H<sub>24</sub>FN<sub>2</sub>O<sup>+</sup>, 351.1873. Found [M+H]<sup>+</sup>, 351.1889.

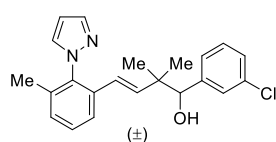

**(E)-1-(3-Chlorophenyl)-2,2-dimethyl-4-(3-methyl-2-(1H-pyrazol-1-yl)phenyl)but-3-en-1-ol (4i)** The general procedure A was followed using 1-*o*-tolyl-1H-pyrazole (31.6 mg, 0.200 mmol, 1.00 equiv) and 3-chlorobenzaldehyde (83.3 mg, 0.600 mmol, 3.00 equiv). Purification by silica gel chromatography (40% ethyl acetate in hexane) provided the product **4i** (59.4 mg, 81% yield) as a yellow oil. IR (neat): 3319, 2966, 1596, 1517, 1469, 1427, 1393 cm<sup>-1</sup>. <sup>1</sup>H NMR (500 MHz, CDCl<sub>3</sub>): δ 7.72 (m, 1H), 7.39-7.38 (m, 2H), 7.31 (t, *J* = 7.6 Hz, 1H), 7.26-7.19 (m, 4H), 7.10 (d, *J* = 7.0 Hz, 1H), 6.42 (m, 1H), 6.01 (d, *J* = 16.3 Hz, 1H), 5.69 (d, *J* = 16.3 Hz, 1H), 4.29 (s, 1H), 2.56-2.37 (bs, 1H), 2.04 (s, 3H), 0.94 (s, 3H), 0.85 (s, 3H). <sup>13</sup>C NMR (126 MHz, CDCl<sub>3</sub>): δ 143.1, 140.2, 139.7, 137.6, 136.2, 136.1, 133.4, 131.6, 129.4, 129.1, 128.7, 127.8, 127.4, 125.9, 124.5, 123.9, 106.0, 80.2, 42.0, 24.4, 21.5, 17.4. HRMS (ESI/[M+H]<sup>+</sup>) calcd. for C<sub>22</sub>H<sub>24</sub>ClN<sub>2</sub>O<sup>+</sup>, 367.1577. Found [M+H]<sup>+</sup>, 367.1594.

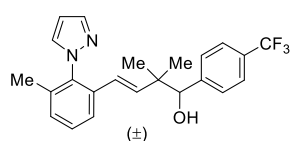

**(E)-2,2-Dimethyl-4-(3-methyl-2-(1H-pyrazol-1-yl)phenyl)-1-(4-(trifluoromethyl)phenyl)but-3-en-1-ol (4j):** The general procedure A was followed using 1-*o*-tolyl-1H-pyrazole (31.6 mg, 0.200 mmol, 1.00 equiv) and 4-(trifluoromethyl)benzaldehyde (104 mg, 0.600 mmol, 3.00 equiv). Purification by silica gel chromatography (20% ethyl acetate in hexane) provided the product **4j** (64.9 mg, 81% yield) as a yellow solid (mp: 122 °C). IR (neat): 3263, 2965, 1706, 1618, 1518, 1469, 1417 cm<sup>-1</sup>. <sup>1</sup>H NMR (500 MHz, CDCl<sub>3</sub>): δ 8.17 (m, 1H), 7.70 (m, 1H), 7.54 (dd, *J* = 8.2, 2.4 Hz, 1H), 7.40-7.34 (m, 2H), 7.31 (t, *J* = 7.7 Hz, 1H), 7.26-7.17 (m, 3H), 6.42 (m, 1H), 5.98 (d, *J* = 16.3 Hz, 1H), 5.64 (d, *J* = 16.3 Hz, 1H), 4.32 (s, 1H), 3.02-2.62 (bs, 1H), 2.03 (s, 3H), 0.93 (s, 3H), 0.83 (s, 3H). <sup>13</sup>C NMR (126 MHz, CDCl<sub>3</sub>): δ 144.9, 140.3, 139.3, 137.6, 136.2, 136.1, 131.5, 129.49 (q, *J* = 32.8 Hz), 129.51, 129.1, 128.0, 124.8, 124.4 (q, *J* = 3.6 Hz), 124.2 (q, *J* = 272.2 Hz), 123.9, 106.1, 80.0, 42.0, 24.4, 21.6, 17.4. <sup>19</sup>F NMR (470 MHz, CDCl<sub>3</sub>): δ -62.4. HRMS (ESI/[M+H]<sup>+</sup>) calcd. for C<sub>23</sub>H<sub>24</sub>F<sub>3</sub>N<sub>2</sub>O<sup>+</sup>, 401.1841. Found [M+H]<sup>+</sup>, 401.1848.

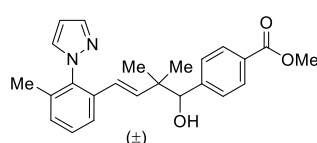

**Methyl (E)-4-(1-hydroxy-2,2-dimethyl-4-(3-methyl-2-(1H-pyrazol-1-yl)phenyl)but-3-en-1-yl)benzoate (4k):** The general procedure A was followed using 1-*o*-tolyl-1H-pyrazole (31.6 mg, 0.200 mmol, 1.00 equiv) and methyl 4-formylbenzoate (98.5 mg, 0.600 mmol, 3.00 equiv). Purification by silica gel chromatography (40% ethyl acetate in hexane) provided the product **4k** (63.3 mg, 81% yield) as a white solid (mp: 91-93 °C). IR (neat): 3335, 2964, 1718, 1611, 1516, 1436, 1415 cm<sup>-1</sup>. <sup>1</sup>H NMR (500 MHz, CDCl<sub>3</sub>): δ 7.93 (d, *J* = 8.3 Hz, 2H), 7.69 (m, 1H), 7.37 (m, 2H), 7.29-7.26 (m, 3H), 7.18 (d, *J* = 7.5 Hz, 1H), 6.38 (m, 1H), 6.01 (d, *J* = 16.3 Hz, 1H), 5.66 (d, *J* = 16.3 Hz, 1H), 4.34 (s, 1H), 3.90 (s, 3H), 2.86-2.68 (bs, 1H), 2.02 (s, 3H), 0.93 (s, 3H), 0.84 (s, 3H). <sup>13</sup>C NMR (126 MHz, CDCl<sub>3</sub>): δ 167.1, 146.3, 140.2, 139.5, 137.5, 136.2, 136.1, 131.5, 129.4, 129.1, 128.7, 127.7, 124.50, 124.46, 123.8, 106.0, 80.5, 52.1, 42.0, 24.3, 21.7, 17.3. HRMS (ESI/[M+H]<sup>+</sup>) calcd. for C<sub>24</sub>H<sub>27</sub>N<sub>2</sub>O<sub>3</sub><sup>+</sup>, 391.2022. Found [M+H]<sup>+</sup>, 391.2030.

## SUPPORTING INFORMATION

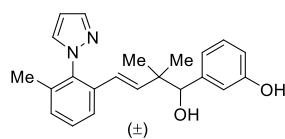**(E)-3-(1-Hydroxy-2,2-dimethyl-4-(3-methyl-2-(1H-pyrazol-1-yl)phenyl)but-3-en-1-yl)phenol (4l):**

The general procedure A was followed using 1-*o*-tolyl-1*H*-pyrazole (31.6 mg, 0.200 mmol, 1.00 equiv) and 3-hydroxybenzaldehyde (73.3 mg, 0.600 mmol, 3.00 equiv). Purification by silica gel chromatography (40% ethyl acetate in hexane) provided the product **4l** (34.9 mg, 50% yield) as a yellow oil. IR (neat): 3280, 2967, 1590, 1517, 1465, 1394  $\text{cm}^{-1}$ .  $^1\text{H}$  NMR (500 MHz,  $\text{CDCl}_3$ ):  $\delta$  7.71 (m, 1H), 7.41 (m, 1H), 7.35 (d,  $J = 7.7$  Hz, 1H), 7.26 (t,  $J = 7.5$  Hz, 1H), 7.15 (d,  $J = 7.3$  Hz, 1H), 7.06–7.03 (m, 1H), 6.68–6.62 (m, 3H), 6.42 (m, 1H), 6.02 (d,  $J = 16.3$  Hz, 1H), 5.64 (d,  $J = 16.3$  Hz, 1H), 4.18 (s, 1H), 2.01 (s, 3H), 0.96 (s, 3H), 0.79 (s, 3H).  $^{13}\text{C}$  NMR (126 MHz,  $\text{CDCl}_3$ ):  $\delta$  155.8, 142.6, 140.3, 140.1, 136.5, 136.2, 131.8, 129.3, 129.2, 128.5, 124.1, 123.8, 123.7, 119.8, 119.7, 114.8, 106.2, 81.3, 41.7, 24.6, 22.7, 17.3. HRMS (ESI/[ $\text{M}+\text{H}$ ] $^+$ ) calcd. for  $\text{C}_{22}\text{H}_{25}\text{N}_2\text{O}_2^+$ , 349.1916. Found [ $\text{M}+\text{H}$ ] $^+$ , 349.1934.

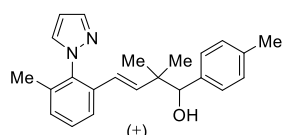**(E)-2,2-Dimethyl-4-(3-methyl-2-(1H-pyrazol-1-yl)phenyl)-1-(*p*-tolyl)but-3-en-1-ol (4m):**

The general procedure A was followed using 1-*o*-tolyl-1*H*-pyrazole (31.6 mg, 0.200 mmol, 1.00 equiv) and 4-methylbenzaldehyde (72.1 mg, 0.600 mmol, 3.00 equiv). Purification by silica gel chromatography (40% ethyl acetate in hexane) provided the product **4m** (43.0 mg, 62% yield) as a colorless oil. IR (neat): 3249, 2965, 1516, 1470, 1393  $\text{cm}^{-1}$ .  $^1\text{H}$  NMR (500 MHz,  $\text{CDCl}_3$ ):  $\delta$  7.57 (m, 1H), 7.25 (d,  $J = 7.7$  Hz, 1H), 7.22 (m, 1H), 7.15 (t,  $J = 7.7$  Hz, 1H), 7.03 (d,  $J = 7.5$  Hz, 1H), 6.96 (m, 4H), 6.25 (m, 1H), 5.94 (d,  $J = 16.3$  Hz, 1H), 5.54 (d,  $J = 16.3$  Hz, 1H), 4.18 (s, 1H), 2.18 (s, 3H), 2.06–1.98 (bs, 1H), 1.90 (s, 3H), 0.80 (s, 3H), 0.72 (s, 3H).  $^{13}\text{C}$  NMR (126 MHz,  $\text{CDCl}_3$ ):  $\delta$  140.0, 139.9, 137.9, 137.5, 136.8, 136.2, 136.0, 131.4, 129.1, 128.9, 128.1, 127.4, 123.8, 123.7, 105.8, 80.8, 41.9, 24.3, 21.8, 20.9, 17.2. HRMS (ESI/[ $\text{M}+\text{H}$ ] $^+$ ) calcd. for  $\text{C}_{23}\text{H}_{27}\text{N}_2\text{O}^+$ , 347.2123. Found [ $\text{M}+\text{H}$ ] $^+$ , 347.2142.

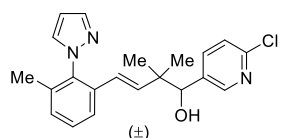**(E)-1-(6-Chloropyridin-3-yl)-2,2-dimethyl-4-(3-methyl-2-(1H-pyrazol-1-yl)phenyl)but-3-en-1-ol (4n):**

The general procedure A was followed using 1-*o*-tolyl-1*H*-pyrazole (31.6 mg, 0.200 mmol, 1.00 equiv) and 6-chloronicotinaldehyde (84.9 mg, 0.600 mmol, 3.00 equiv). Purified by silica gel chromatography (30% ethyl acetate in hexane) provided the product **4n** (69.2 mg, 94% yield) as a white solid (mp: 72–74  $^{\circ}\text{C}$ ). IR (neat): 3198, 3047, 2971, 2931, 1570, 1506, 1459  $\text{cm}^{-1}$ .  $^1\text{H}$  NMR (500 MHz,  $\text{CDCl}_3$ ):  $\delta$  8.10 (m, 1H), 7.66 (s, 1H), 7.49 (dd,  $J = 8.2, 8.5$  Hz, 1H), 7.35–7.34 (m, 2H), 7.28 (t,  $J = 7.7$  Hz, 1H), 7.18 (m, 2H), 6.39 (m, 1H), 5.99 (d,  $J = 16.3$  Hz, 1H), 5.56 (d,  $J = 16.3$  Hz, 1H), 4.22 (s, 1H), 3.63–3.47 (bs, 1H), 1.98 (s, 3H), 0.88 (s, 3H), 0.79 (s, 3H).  $^{13}\text{C}$  NMR (126 MHz,  $\text{CDCl}_3$ ):  $\delta$  150.0, 148.8, 140.1, 138.9, 138.0, 137.4, 136.1, 136.0, 135.7, 131.6, 129.5, 129.2, 124.7, 123.8, 123.2, 106.1, 77.8, 41.9, 24.0, 21.7, 17.3. HRMS (ESI/[ $\text{M}+\text{H}$ ] $^+$ ) calcd. for  $\text{C}_{21}\text{H}_{23}\text{ClN}_3\text{O}^+$ , 368.1530. Found [ $\text{M}+\text{H}$ ] $^+$ , 368.1547.

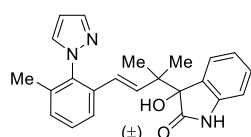**(E)-3-Hydroxy-3-(2-methyl-4-(3-methyl-2-(1H-pyrazol-1-yl)phenyl)but-3-en-2-yl)indolin-2-one (4o):**

The general procedure A was followed using 1-*o*-tolyl-1*H*-pyrazole (31.6 mg, 0.200 mmol, 1.00 equiv) and isatin (88.3 mg, 0.600 mmol, 3.00 equiv). Purification by silica gel chromatography (15% ethyl acetate in dichloromethane) provided the product **4o** (38.1 mg, 51% yield) as a pale yellow solid (mp: 101–103  $^{\circ}\text{C}$ ). IR (neat): 3264, 2973, 1712, 1620, 1470, 1393  $\text{cm}^{-1}$ .  $^1\text{H}$  NMR (500 MHz,  $\text{CDCl}_3$ ):  $\delta$  8.03 (bs, 1H), 7.69 (m, 1H), 7.45 (d,  $J = 7.7$  Hz, 1H), 7.40 (m, 1H), 7.29–7.24 (m, 2H), 7.21 (t,  $J = 7.9$  Hz, 1H), 7.15 (d,  $J = 7.5$  Hz, 1H), 6.98 (t,  $J = 7.6$  Hz, 1H), 6.77 (d,  $J = 7.7$  Hz, 1H), 6.38 (m, 2H), 5.73 (d,  $J = 16.3$  Hz, 1H), 2.03 (s, 3H), 1.07 (s, 3H), 1.03 (s, 3H).  $^{13}\text{C}$  NMR (126 MHz,  $\text{CDCl}_3$ ):  $\delta$  180.1, 141.3, 140.1, 137.49, 137.45, 136.9, 136.1, 135.9, 131.7, 129.4, 129.3, 129.1, 126.0, 125.0, 123.9, 122.1, 109.9, 106.0, 80.9, 43.2, 22.1, 20.2, 17.3. HRMS (ESI/[ $\text{M}+\text{H}$ ] $^+$ ) calcd. for  $\text{C}_{23}\text{H}_{24}\text{N}_3\text{O}_2^+$ , 374.1869. Found [ $\text{M}+\text{H}$ ] $^+$ , 374.1879.

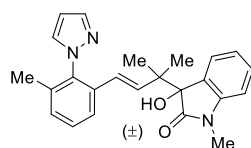**(E)-3-Hydroxy-1-methyl-3-(2-methyl-4-(3-methyl-2-(1H-pyrazol-1-yl)phenyl)but-3-en-2-yl)indolin-2-one (4p):**

The general procedure A was followed using 1-*o*-tolyl-1*H*-pyrazole (31.6 mg, 0.200 mmol, 1.00 equiv) and 1-methylisatin (96.7 mg, 0.600 mmol, 3.00 equiv). Purification by silica gel chromatography (20% ethyl acetate in dichloromethane) provided the product **4p** (37.2 mg, 48% yield) as a pale yellow solid (mp: 152–155  $^{\circ}\text{C}$ ). IR (neat): 3399, 2980, 1705, 1612, 1464, 1352  $\text{cm}^{-1}$ .  $^1\text{H}$  NMR (500 MHz,  $\text{CDCl}_3$ ):  $\delta$  7.71 (m, 1H), 7.48 (d,  $J = 7.7$  Hz, 1H), 7.41 (m, 1H), 7.31–7.26 (m, 3H), 7.19 (d,  $J = 7.5$  Hz, 1H), 7.01 (t,  $J = 7.5$  Hz, 1H), 6.77 (d,  $J = 7.7$  Hz, 1H), 6.45–6.41 (m, 2H), 5.73 (d,  $J = 16.3$  Hz, 1H), 3.13 (s, 3H), 2.91 (s, 1H), 2.04 (s, 3H), 1.03 (s, 3H), 1.00 (s, 3H).  $^{13}\text{C}$  NMR (126 MHz,  $\text{CDCl}_3$ ):  $\delta$  177.6, 144.1, 140.2, 137.7, 136.9, 136.1, 136.0, 131.6, 129.53, 129.52, 129.1, 128.5, 125.6, 125.4, 123.9, 122.4, 107.9, 106.0, 80.5, 43.3, 26.1, 22.1, 20.3, 17.4. HRMS (ESI/[ $\text{M}+\text{H}$ ] $^+$ ) calcd. for  $\text{C}_{24}\text{H}_{26}\text{N}_3\text{O}_2^+$ , 388.2025. Found [ $\text{M}+\text{H}$ ] $^+$ , 388.2027.

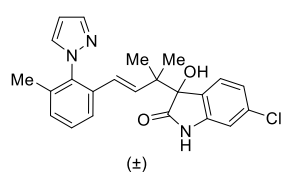**(E)-6-Chloro-3-hydroxy-3-(2-methyl-4-(3-methyl-2-(1H-pyrazol-1-yl)phenyl)but-3-en-2-yl) indolin-2-one (4q):**

The general procedure A was modified using 1-*o*-tolyl-1*H*-pyrazole (31.6 mg, 0.200 mmol, 1.00 equiv) and 6-chloroisatin (109 mg, 0.600 mmol, 3.00 equiv). Purification by silica gel chromatography (40% ethyl acetate in hexane) provided yellow oil. This material was further purified by another silica gel chromatography (20% ethyl acetate in dichloromethane) to provide the product **4q** (36.3 mg, 49% yield) as a white solid (mp: 146–148  $^{\circ}\text{C}$ ). IR (neat): 3378, 2969, 1706, 1610, 1466, 1391  $\text{cm}^{-1}$ .  $^1\text{H}$  NMR (600 MHz,  $\text{DMSO}-d_6$ )  $\delta$  10.31 (s, 1H), 7.66 (m, 2H), 7.46 (d,  $J = 7.8$  Hz, 1H), 7.39 (t,  $J = 7.8$  Hz, 1H), 7.27 (d,  $J = 7.8$  Hz, 1H), 7.07 (d,  $J = 8.0$  Hz, 1H), 6.95 (d,  $J = 8.0$  Hz, 1H), 6.74 (m, 1H), 6.42 (d,  $J = 2.1$  Hz, 1H), 6.37 (d,  $J = 16.3$  Hz, 1H), 6.00 (s, 1H), 5.40 (d,  $J = 16.3$  Hz, 1H), 1.93 (s, 3H), 1.05 (s, 3H), 0.80 (s, 3H).  $^{13}\text{C}$  NMR (151 MHz,  $\text{DMSO}-d_6$ )  $\delta$  178.5, 143.6, 139.8, 137.6, 135.8, 135.5, 133.0, 132.2, 129.8, 129.17, 129.15, 126.9, 123.1, 122.4, 120.6, 109.0, 105.8, 79.0, 42.5, 21.3, 20.2, 16.9 (2 aromatic peaks overlap). HRMS (ESI/[ $\text{M}+\text{H}$ ] $^+$ ) calcd. for  $\text{C}_{23}\text{H}_{23}\text{ClN}_3\text{O}_2^+$ , 408.1473. Found [ $\text{M}+\text{H}$ ] $^+$ , 408.1480.

## SUPPORTING INFORMATION

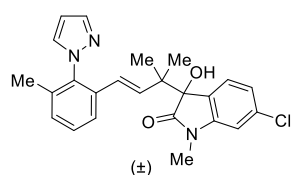**(E)-6-Chloro-3-hydroxy-1-methyl-3-(2-methyl-4-(3-methyl-2-(1H-pyrazol-1-yl)phenyl)but-3-en-2-yl)indolin-2-one (4r):**

The general procedure A was modified using 1-*o*-tolyl-1*H*-pyrazole (31.6 mg, 0.200 mmol, 1.00 equiv) and 6-chloro-1-methylisatin (117 mg, 0.600 mmol, 3.00 equiv). Purification by silica gel chromatography (40% ethyl acetate in hexane) provided yellow oil. This material was further purified by another silica gel chromatography (20% ethyl acetate in dichloromethane) to provide the product **4r** (40.5 mg, 52% yield) as a white solid (mp: 168-170 °C). IR (neat): 3392, 2964, 1704, 1608, 1462, 1380 cm<sup>-1</sup>. <sup>1</sup>H NMR (500 MHz, CDCl<sub>3</sub>): δ 7.70 (m, 1H), 7.45 (d, *J* = 7.8 Hz, 1H), 7.41 (m, 1H), 7.30 (t, *J* = 7.8 Hz, 1H), 7.21-7.14 (m, 2H), 7.03-6.95 (m, 1H), 6.76 (m, 1H), 6.42 (t, *J* = 2.1 Hz, 1H), 6.36 (d, *J* = 16.3 Hz, 1H), 5.72 (d, *J* = 16.3 Hz, 1H), 3.10 (s, 3H), 2.04 (s, 3H), 1.02 (s, 3H), 0.97 (s, 3H). <sup>13</sup>C NMR (101 MHz, CDCl<sub>3</sub>) δ 177.6, 145.4, 140.4, 137.8, 136.6, 136.3, 136.0, 135.4, 131.7, 129.8, 129.3, 127.0, 126.7, 125.8, 124.0, 122.3, 108.7, 106.2, 80.3, 43.4, 26.3, 22.2, 20.4, 17.5. HRMS (ESI/[M+H]<sup>+</sup>) calcd. for C<sub>24</sub>H<sub>25</sub>ClN<sub>3</sub>O<sub>2</sub><sup>+</sup>, 422.1630. Found [M+H]<sup>+</sup>, 422.1640.

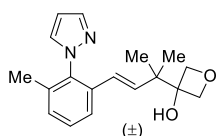**(E)-3-(2-Methyl-4-(3-methyl-2-(1H-pyrazol-1-yl)phenyl)but-3-en-2-yl)oxetan-3-ol (4s):**

The general procedure A was followed using 1-*o*-tolyl-1*H*-pyrazole (31.6 mg, 0.200 mmol, 1.00 equiv) and benzyl oxetan-3-one (43.2 mg, 0.600 mmol, 3.00 equiv). Purified by silica gel chromatography (30% ethyl acetate in hexane) provided the product **4s** (46.5 mg, 78% yield) as a white solid (mp: 83-86 °C). IR (neat): 3309, 2962, 2881, 1645, 1511, 1469, 1396 cm<sup>-1</sup>. <sup>1</sup>H NMR (500 MHz, CDCl<sub>3</sub>): δ 7.59 (m, 1H), 7.31 (m, 1H), 7.21 (d, *J* = 7.7 Hz, 1H), 7.14 (t, *J* = 7.5 Hz, 1H), 7.04 (d, *J* = 7.3 Hz, 1H), 6.31 (m, 1H), 5.85 (d, *J* = 16.2 Hz, 1H), 5.65 (d, *J* = 16.2 Hz, 1H), 4.39 (d, *J* = 6.8 Hz, 2H), 4.25 (d, *J* = 6.8 Hz, 2H), 2.84-2.66 (bs, 1H), 1.88 (s, 3H), 0.88 (s, 6H). <sup>13</sup>C NMR (126 MHz, CDCl<sub>3</sub>): δ 140.1, 137.4, 137.3, 136.0, 135.9, 131.3, 129.4, 129.0, 125.3, 124.0, 106.1, 80.0, 78.3, 40.5, 21.1, 17.2. HRMS (ESI/[M+H]<sup>+</sup>) calcd. for C<sub>18</sub>H<sub>23</sub>N<sub>2</sub>O<sub>2</sub><sup>+</sup> 299.1760. Found [M+H]<sup>+</sup>, 299.1769.

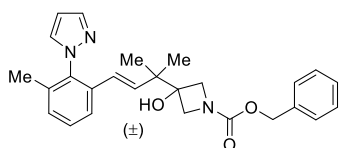**Benzyl (E)-3-hydroxy-3-(2-methyl-4-(3-methyl-2-(1H-pyrazol-1-yl)phenyl)but-3-en-2-yl)azetidine-1-carboxylate (4t):**

The general procedure A was followed using 1-*o*-tolyl-1*H*-pyrazole (31.6 mg, 0.200 mmol, 1.00 equiv) and benzyl 3-oxoazetidine-1-carboxylate (123 mg, 0.600 mmol, 3.00 equiv). Purified by silica gel chromatography (30% ethyl acetate in hexane) provided the product **4t** (80.3 mg, 93% yield) as a yellow oil. IR (neat): 3295, 2963, 1701, 1417, 1393, 1354 cm<sup>-1</sup>. <sup>1</sup>H NMR (500 MHz, CDCl<sub>3</sub>): δ 7.72 (m, 1H), 7.44 (m, 1H), 7.33-7.26 (m, 7H), 7.19 (d, *J* = 7.2 Hz, 1H), 6.44 (m, 1H), 5.93 (d, *J* = 16.2 Hz, 1H), 5.79 (d, *J* = 16.2 Hz, 1H), 5.03 (s, 2H), 3.97 (d, *J* = 9.3 Hz, 2H), 3.66 (d, *J* = 9.3 Hz, 2H), 3.42-3.20 (bs, 1H), 2.03 (s, 3H), 0.97 (s, 6H). <sup>13</sup>C NMR (126 MHz, CDCl<sub>3</sub>): δ 156.3, 140.3, 137.4, 137.1, 136.5, 136.1, 135.9, 131.6, 129.7, 129.3, 128.5, 128.0, 127.9, 125.8, 124.1, 106.3, 75.2, 66.8, 58.5, 58.1, 41.3, 21.1, 17.3. HRMS (ESI/[M+H]<sup>+</sup>) calcd. for C<sub>26</sub>H<sub>30</sub>N<sub>3</sub>O<sub>3</sub><sup>+</sup>, 432.2287. Found [M+H]<sup>+</sup>, 432.2294.

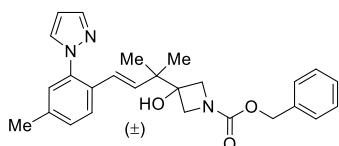**Benzyl (E)-3-hydroxy-3-(2-methyl-4-(4-methyl-2-(1H-pyrazol-1-yl)phenyl)but-3-en-2-yl)azetidine-1-carboxylate (4u):**

The general procedure A was followed using 1-*m*-tolyl-1*H*-pyrazole (31.6 mg, 0.200 mmol, 1.00 equiv) and benzyl 3-oxoazetidine-1-carboxylate (123 mg, 0.600 mmol, 3.00 equiv). Purified by silica gel chromatography (30% ethyl acetate in hexane) provided the product **4u** (81.1 mg, 94% yield) as a yellow oil. IR (neat): 3385, 2965, 1702, 1454, 1416, 1354 cm<sup>-1</sup>. <sup>1</sup>H NMR (500 MHz, CDCl<sub>3</sub>): δ 7.71 (m, 1H), 7.62 (m, 1H), 7.37 (d, *J* = 8.4 Hz, 1H), 7.33-7.29 (m, 5H), 7.15 (m, 2H), 6.43 (m, 1H), 6.26 (d, *J* = 16.2 Hz, 1H), 5.95 (d, *J* = 16.2 Hz, 1H), 5.06 (s, 2H), 4.06 (d, *J* = 9.3 Hz, 2H), 3.75 (d, *J* = 9.5 Hz, 2H), 3.57-3.34 (bs, 1H), 2.37 (s, 3H), 1.07 (s, 6H). <sup>13</sup>C NMR (126 MHz, CDCl<sub>3</sub>): δ 156.4, 140.7, 138.3, 137.9, 136.6, 135.9, 130.9, 130.4, 129.2, 128.5, 128.0, 127.9, 127.3, 127.0, 126.0, 106.6, 75.4, 66.7, 58.8, 58.2, 41.3, 29.3, 21.4, 20.9. HRMS (ESI/[M+H]<sup>+</sup>) calcd. for C<sub>26</sub>H<sub>30</sub>N<sub>3</sub>O<sub>3</sub><sup>+</sup>, 432.2287. Found [M+H]<sup>+</sup>, 432.2267.

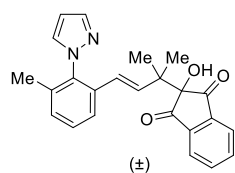**(E)-2-Hydroxy-2-(2-methyl-4-(3-methyl-2-(1H-pyrazol-1-yl)phenyl)but-3-en-2-yl)-1H-indene-1,3(2H)-dione (4v):**

The general procedure A was modified using 1-*o*-tolyl-1*H*-pyrazole (31.6 mg, 0.200 mmol, 1.00 equiv) and indantrione (96.1 mg, 0.600 mmol, 3.00 equiv). Purification by silica gel chromatography (40% ethyl acetate in hexane) to provide the product **4v** (26.7 mg, 35% yield) as a white solid (mp: 153-155 °C). IR (neat): 3152, 2974, 1742, 1708, 1596, 1462, 1396 cm<sup>-1</sup>. <sup>1</sup>H NMR (500 MHz, CDCl<sub>3</sub>) δ 7.95-7.93 (m, 2H), 7.86-7.84 (m, 2H), 7.72 (d, *J* = 1.9 Hz, 1H), 7.43 (d, *J* = 1.9 Hz, 1H), 7.20 (t, *J* = 7.6 Hz, 1H), 7.15 (d, *J* = 7.5 Hz, 1H), 7.07 (d, *J* = 7.7, 1.5 Hz, 1H), 6.43 (m, 1H), 5.99 (d, *J* = 16.1 Hz, 1H), 5.70 (d, *J* = 16.1 Hz, 1H), 2.01 (s, 3H), 1.00 (s, 6H). <sup>13</sup>C NMR (126 MHz, CDCl<sub>3</sub>) δ 199.5, 141.6, 140.5, 137.8, 136.5, 136.4, 136.2, 135.8, 131.7, 129.8, 129.1, 125.8, 123.8, 123.3, 106.2, 81.8, 43.7, 22.4, 17.4. HRMS (ESI/[M+H]<sup>+</sup>) calcd. for C<sub>24</sub>H<sub>23</sub>N<sub>2</sub>O<sub>3</sub><sup>+</sup>, 387.1703. Found [M+H]<sup>+</sup>, 387.1696.

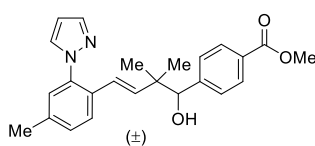**Methyl (E)-4-(1-hydroxy-2,2-dimethyl-4-(4-methyl-2-(1H-pyrazol-1-yl)phenyl)but-3-en-1-yl)benzoate (4w):**

The general procedure A was followed using 1-*m*-tolyl-1*H*-pyrazole (31.6 mg, 0.200 mmol, 1.00 equiv) and methyl 4-formylbenzoate (98.5 mg, 0.600 mmol, 3.00 equiv). Purification by silica gel chromatography (40% ethyl acetate in hexane) provided the product **4w** (55.4 mg, 73% yield) as a white solid (mp: 115-117 °C). IR (neat): 3220, 3119, 2969, 1709, 1610, 1515, 1406 cm<sup>-1</sup>. <sup>1</sup>H NMR (500 MHz, CDCl<sub>3</sub>): δ 7.95 (d, *J* = 7.8 Hz, 2H), 7.69 (m, 1H), 7.49 (m, 1H), 7.40 (d, *J* = 7.9 Hz, 1H), 7.34 (d, *J* = 7.9 Hz, 2H), 7.19-7.16 (m, 2H), 6.36 (m, 1H), 6.18 (d, *J* = 16.3 Hz, 1H), 6.00 (d, *J* = 16.3 Hz, 1H), 4.47 (s, 1H), 3.90 (s, 3H), 3.07-2.90 (bs, 1H), 2.38 (s, 3H), 1.04 (s, 3H), 0.95 (s, 3H). <sup>13</sup>C NMR (126 MHz, CDCl<sub>3</sub>): δ 167.0, 146.4, 140.6, 138.4,



## SUPPORTING INFORMATION

138.1, 138.0, 130.9, 130.3, 129.1, 129.0, 128.8, 127.8, 127.2, 126.0, 125.7, 106.4, 80.8, 52.0, 42.1, 24.6, 22.1, 20.9. HRMS (ESI/[M+H]<sup>+</sup>) calcd. for C<sub>24</sub>H<sub>27</sub>N<sub>2</sub>O<sub>3</sub><sup>+</sup>, 391.2022. Found [M+H]<sup>+</sup>, 391.2025.

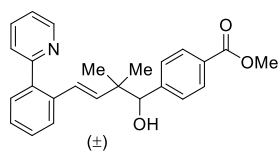

**Methyl (E)-4-(1-hydroxy-2,2-dimethyl-4-(2-(pyridin-2-yl)phenyl)but-3-en-1-yl) benzoate (4x):** The general procedure A was followed using 2-phenylpyridine (31.0 mg, 0.200 mmol, 1.00 equiv) and methyl 4-formylbenzoate (98.5 mg, 0.600 mmol, 3.00 equiv). Purification by silica gel chromatography (40% ethyl acetate in hexane) provided the product **4x** (73.6 mg, 95% yield) as a yellow oil. IR (neat): 3368, 2956, 1718, 1610, 1588, 1461, 1435 cm<sup>-1</sup>. <sup>1</sup>H NMR (500 MHz, CDCl<sub>3</sub>): δ 8.68 (m, 1H), 7.96 (d, *J* = 7.4 Hz, 2H), 7.69 (t, *J* = 7.7 Hz, 1H), 7.49 (d, *J* = 7.2 Hz, 2H), 7.40-7.34 (m, 5H), 7.25-7.19 (m, 1H), 6.52 (d, *J* = 16.2 Hz, 1H), 6.00 (d, *J* = 16.2 Hz, 1H), 4.48 (s, 1H), 3.90 (s, 3H), 3.77-3.43 (bs, 1H), 1.06 (s, 3H), 0.95 (s, 3H). <sup>13</sup>C NMR (126 MHz, CDCl<sub>3</sub>): δ 167.1, 158.8, 149.1, 146.5, 138.3, 138.0, 136.7, 136.4, 130.0, 129.8, 129.0, 128.8, 128.7, 127.8, 127.4, 127.1, 124.4, 121.9, 80.7, 52.0, 42.2, 24.9, 21.8. HRMS (ESI/[M+H]<sup>+</sup>) calcd. for C<sub>25</sub>H<sub>26</sub>NO<sub>3</sub><sup>+</sup>, 388.1913. Found [M+H]<sup>+</sup>, 388.1919.

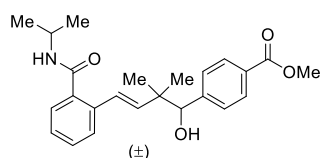

**Methyl (E)-4-(1-hydroxy-2,2-dimethyl-4-(2-(isopropylcarbamoyl)phenyl)-2,2-dimethylbut-3-en-1-yl) benzoate (4y):** The general procedure A was followed using *N*-isopropylbenzamide (32.6 mg, 0.200 mmol, 1.00 equiv) and methyl 4-formylbenzoate (98.5 mg, 0.600 mmol, 3.00 equiv). Purification by silica gel chromatography (20% methyl *tert*-butyl ether in hexane) provided the product **4y** (35.6 mg, 45% yield) as a colorless oil. IR (neat): 3346, 2971, 1718, 1631, 1531, 1436 cm<sup>-1</sup>. <sup>1</sup>H NMR (500 MHz, CDCl<sub>3</sub>): δ 7.94 (d, *J* = 7.9 Hz, 2H), 7.41 (t, *J* = 7.6 Hz, 2H), 7.38-7.33 (m, 3H), 7.25 (d, *J* = 6.7 Hz, 1H), 6.63 (d, *J* = 16.2 Hz, 1H), 6.08 (d, *J* = 16.2 Hz, 1H), 5.83-5.67 (bs, 1H), 4.47 (s, 1H), 4.31-4.16 (m, 1H), 3.89 (s, 3H), 3.27-2.78 (bs, 1H), 1.17 (d, *J* = 6.4 Hz, 6H), 1.08 (s, 3H), 1.02 (s, 3H). <sup>13</sup>C NMR (126 MHz, CDCl<sub>3</sub>): δ 168.6, 167.0, 146.4, 139.5, 136.0, 135.2, 130.1, 129.2, 128.8, 127.8, 127.5, 127.2, 127.1, 126.7, 80.7, 52.1, 42.2, 41.9, 24.8, 22.7, 21.7. HRMS (ESI/[M+H]<sup>+</sup>) calcd. for C<sub>24</sub>H<sub>30</sub>NO<sub>4</sub><sup>+</sup>, 396.2175. Found [M+H]<sup>+</sup>, 396.2191.

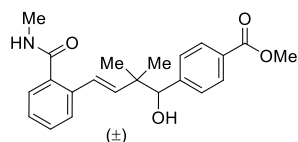

**Methyl (E)-4-(1-hydroxy-2,2-dimethyl-4-(2-(methylcarbamoyl)phenyl)but-3-en-1-yl)benzoate (4z):** The general procedure A was modified using *N*-methylbenzamide (27.0 mg, 0.200 mmol, 1.00 equiv) and methyl 4-formylbenzoate (98.5 mg, 0.600 mmol, 3.00 equiv). Purification by silica gel chromatography (40% ethyl acetate in hexane) provided the product **4z** (36.0 mg, 49% yield) as a colorless oil. IR (neat): 3351, 2963, 2881, 1700, 1608, 1453, 1423 cm<sup>-1</sup>. <sup>1</sup>H NMR (500 MHz, CDCl<sub>3</sub>): δ 7.92 (d, *J* = 8.3 Hz, 2H), 7.43-7.42 (m, 1H), 7.40-7.46 (m, 2H), 7.32 (d, *J* = 8.3 Hz, 2H), 7.26-7.22 (m, 1H), 6.59 (d, *J* = 16.3 Hz, 1H), 6.03 (d, *J* = 16.3 Hz, 1H), 6.03 (s, 1H), 4.48 (s, 1H), 3.88 (s, 3H), 3.16 (bs, 1H), 2.84 (s, 3H), 1.91 (bs, 1H), 1.09 (s, 3H), 1.01 (s, 3H). <sup>13</sup>C NMR (126 MHz, CDCl<sub>3</sub>): δ 170.0, 167.0, 146.5, 139.7, 136.4, 134.6, 130.3, 129.1, 128.7, 127.8, 127.6, 127.5, 127.2, 127.0, 80.7, 52.1, 42.1, 26.7, 24.8, 21.9. HRMS (ESI/[M+Na]<sup>+</sup>) calcd. for C<sub>22</sub>H<sub>26</sub>NNaO<sub>4</sub><sup>+</sup>, 390.1681. Found [M+Na]<sup>+</sup>, 390.1662.

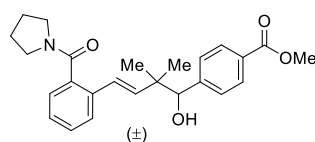

**Methyl (E)-4-(1-hydroxy-2,2-dimethyl-4-(2-(pyrrolidine-1-carbonyl)phenyl)but-3-en-1-yl) benzoate (4aa):** The general procedure A was followed using phenyl(pyrrolidin-1-yl)methanone (35.0 mg, 0.200 mmol, 1.00 equiv) and methyl 4-formylbenzoate (98.5 mg, 0.600 mmol, 3.00 equiv). Purification by silica gel chromatography (65% ethyl acetate in hexane) provided the product **4aa** (48.9 mg, 60% yield) as a colorless oil. IR (neat): 3359, 2955, 2876, 1718, 1609, 1454, 1434 cm<sup>-1</sup>. <sup>1</sup>H NMR (500 MHz, CDCl<sub>3</sub>): δ 7.94 (d, *J* = 7.9 Hz, 2H), 7.46 (d, *J* = 7.8 Hz, 1H), 7.36-7.31 (m, 3H), 7.26-7.22 (m, 2H), 6.36 (d, *J* = 16.2 Hz, 1H), 6.22 (d, *J* = 16.2 Hz, 1H), 4.51 (s, 1H), 3.90 (s, 3H), 3.59 (t, *J* = 6.5 Hz, 2H), 3.03 (m, 2H), 2.67-2.49 (bs, 1H), 1.87 (m, 2H), 1.77 (m, 2H), 1.07 (s, 3H), 1.01 (s, 3H). <sup>13</sup>C NMR (126 MHz, CDCl<sub>3</sub>): δ 169.7, 167.0, 146.4, 139.4, 136.4, 134.0, 129.12, 129.09, 128.7, 127.8, 127.3, 126.2, 126.0, 125.7, 80.7, 52.1, 48.2, 45.5, 42.1, 25.9, 24.6, 24.5, 22.2. HRMS (ESI/[M+H]<sup>+</sup>) calcd. for C<sub>25</sub>H<sub>30</sub>NO<sub>4</sub><sup>+</sup>, 408.2175. Found [M+H]<sup>+</sup>, 408.2184.

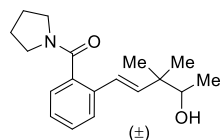

**(E)-2-(4-Hydroxy-3,3-dimethylpent-1-en-1-yl)phenyl(pyrrolidin-1-yl)methanone (4ab):** The general procedure A was modified using phenyl(pyrrolidin-1-yl)methanone (35.0 mg, 0.200 mmol, 1.00 equiv) and acetaldehyde (26.4 mg, 0.600 mmol, 3.00 equiv). Purification by silica gel chromatography (60% ethyl acetate in hexane) provided the product **4ab** (24.1 mg, 42% yield) as a colorless oil. IR (neat): 3411, 2970, 2875, 1608, 1452, 1426 cm<sup>-1</sup>. <sup>1</sup>H NMR (500 MHz, CDCl<sub>3</sub>): δ 7.45 (d, *J* = 7.8 Hz, 1H), 7.33-7.29 (m, 1H), 7.24-7.23 (m, 2H), 6.42 (d, *J* = 16.3 Hz, 1H), 6.16 (d, *J* = 16.3 Hz, 1H), 3.64 (t, *J* = 7.0 Hz, 2H), 3.57 (q, *J* = 6.4 Hz, 1H), 3.11 (t, *J* = 6.8 Hz, 2H), 1.96-1.90 (m, 2H), 1.86-1.80 (m, 3H), 1.12 (d, *J* = 6.4 Hz, 3H), 1.07 (s, 3H), 1.06 (s, 3H). <sup>13</sup>C NMR (126 MHz, CDCl<sub>3</sub>): δ 169.8, 140.4, 136.4, 134.2, 129.0, 127.2, 126.3, 126.2, 125.6, 74.5, 48.2, 45.6, 41.5, 26.0, 24.6, 23.8, 22.1, 17.8. HRMS (ESI/[M+H]<sup>+</sup>) calcd. for C<sub>18</sub>H<sub>26</sub>NO<sub>2</sub><sup>+</sup>, 288.1964. Found [M+H]<sup>+</sup>, 288.1978.

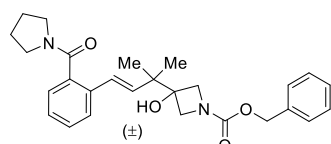

**Benzyl (E)-3-hydroxy-3-(2-methyl-4-(2-(pyrrolidine-1-carbonyl)phenyl)but-3-en-2-yl)azetidine-1-carboxylate (4ac):** The general procedure A was modified using phenyl(pyrrolidin-1-yl)methanone (35.0 mg, 0.200 mmol, 1.00 equiv) and benzyl 3-oxoazetidine-1-carboxylate (123 mg, 0.600 mmol, 3.00 equiv). Purification by silica gel chromatography (40% ethyl acetate in hexane) provided the product **4ac** (26.9 mg, 30% yield) as a colorless oil. IR (neat): 3361, 2963, 1716, 1633, 1536, 1436, 1411 cm<sup>-1</sup>. <sup>1</sup>H NMR (500 MHz, CDCl<sub>3</sub>): δ 7.40 (d, *J* = 7.8 Hz, 1H), 7.34-7.29 (m, 5H), 7.27-7.22 (m, 3H), 6.50 (d, *J* = 16.2 Hz, 1H), 6.10 (d, *J* = 16.2 Hz, 1H), 5.05 (s, 2H), 4.08 (d, *J* = 9.4 Hz, 2H), 3.77 (d, *J* = 9.4 Hz, 2H), 3.62 (t, *J* = 7.0 Hz, 2H), 3.10 (t, *J* = 6.8 Hz, 2H), 1.93-1.90 (m, 2H), 1.83-1.80 (m, 2H), 1.13 (s, 6H). <sup>13</sup>C NMR (126 MHz,

## SUPPORTING INFORMATION

CDCl<sub>3</sub>: δ 169.7, 156.4, 137.2, 136.5, 136.2, 134.1, 129.2, 128.5, 128.0, 127.9, 127.5, 127.4, 126.6, 126.3, 75.3, 66.8, 58.8, 58.2, 48.5, 45.6, 41.4, 26.0, 24.6, 21.4. HRMS (ESI/[M+H]<sup>+</sup>) calcd. for C<sub>27</sub>H<sub>33</sub>N<sub>2</sub>O<sub>4</sub><sup>+</sup>, 449.2440. Found [M+H]<sup>+</sup>, 449.2427.

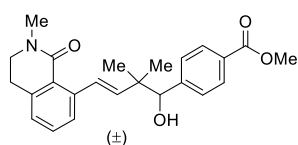

**Methyl (E)-4-(1-hydroxy-2,2-dimethyl-4-(2-methyl-1-oxo-1,2,3,4-tetrahydroisoquinolin-8-yl)but-3-en-1-yl)benzoate (4ad):** The general procedure A was modified using 2-methyl-3,4-dihydroisoquinolin-1(2H)-one (32.2 mg, 0.200 mmol, 1.00 equiv) and methyl 4-formylbenzoate (98.5 mg, 0.600 mmol, 3.00 equiv) in toluene at 70 °C. Purification by silica gel chromatography (40% ethyl acetate in hexane) provided the product **4ad** (29.1 mg, 42% yield) as a yellow oil. IR (neat): 3395.8, 2953.1, 1717.5, 1630.1, 1489.1, 1435.3, 1275.6 cm<sup>-1</sup>. <sup>1</sup>H NMR (500 MHz, CDCl<sub>3</sub>): δ 7.94 (d, *J* = 8.2 Hz, 2H), 7.42 (d, *J* = 8.2 Hz, 2H), 7.33 (t, *J* = 7.6 Hz, 1H), 7.27 (d, *J* = 6.9 Hz, 1H), 7.21 (d, *J* = 7.6 Hz, 1H), 7.09 (d, *J* = 7.4 Hz, 1H), 5.65 (d, *J* = 16.3 Hz, 1H), 4.54 (s, 1H), 4.43-4.16 (bs, 1H), 3.89 (s, 3H), 3.55 (t, *J* = 6.1 Hz, 2H), 3.16 (s, 3H), 2.98 (t, *J* = 6.4 Hz, 2H), 1.13 (s, 3H), 1.05 (s, 3H). <sup>13</sup>C NMR (126 MHz, CDCl<sub>3</sub>): δ 167.2, 164.8, 146.6, 140.9, 139.2, 137.3, 132.7, 131.1, 128.8, 128.6, 128.0, 127.6, 126.6, 126.2, 80.6, 52.0, 47.9, 42.0, 35.4, 29.0, 25.8, 21.3. HRMS (ESI/[M+H]<sup>+</sup>) calcd. for C<sub>24</sub>H<sub>28</sub>NO<sub>4</sub><sup>+</sup>, 394.2018. Found [M+H]<sup>+</sup>, 394.2031.

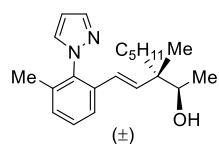

**(±)-(2R,3S)-3-Methyl-3-((E)-3-methyl-2-(1H-pyrazol-1-yl)styryl)octan-2-ol (6a):** The general procedure A was followed using 1-*o*-tolyl-1H-pyrazole (31.6 mg, 0.200 mmol, 1.00 equiv), 3-methyloct-1-ene (49.7 mg, 0.400 mmol, 2.00 equiv) and acetaldehyde (26.4 mg, 0.600 mmol, 3.00 equiv). Purification by silica gel chromatography (20% ethyl acetate in hexane) provided the product **6a** (40.5 mg, 62% yield, >20:1 *dr*) as a clear oil. IR (neat): 3367, 2957, 2930, 2859, 1516, 1488, 1392, 1087 cm<sup>-1</sup>. <sup>1</sup>H NMR (400 MHz, CDCl<sub>3</sub>): δ 7.74-7.69 (m, 1H), 7.46-7.41 (m, 1H), 7.37-7.35 (m, 1H), 7.29-7.24 (m, 1H), 7.16-7.14 (m, 1H), 6.44-6.42 (m, 1H),

5.89 (d, *J* = 16.4 Hz, 1H), 5.69 (d, *J* = 16.4 Hz, 1H), 3.44 (q, *J* = 6.3 Hz, 1H), 2.02 (s, 3H), 1.83 (bs, 1H), 1.33-1.04 (m, 8H), 1.02 (d, *J* = 6.3 Hz, 3H), 0.84 (t, *J* = 7.1 Hz, 3H), 0.79 (s, 3H). <sup>13</sup>C NMR (101 MHz, CDCl<sub>3</sub>): δ 140.2, 139.6, 137.4, 136.5, 136.1, 131.4, 129.2, 129.0, 125.4, 124.0, 106.1, 73.3, 44.8, 37.6, 32.6, 23.8, 22.6, 17.3, 17.1, 17.0, 14.1. HRMS (ESI/[M+H]<sup>+</sup>) calcd. for C<sub>21</sub>H<sub>31</sub>N<sub>2</sub>O<sup>+</sup>, 327.2431. Found [M+H]<sup>+</sup>, 327.2441.

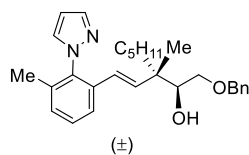

**(±)-(E)-1-(Benzyloxy)-3-methyl-3-((E)-3-methyl-2-(1H-pyrazol-1-yl)styryl)octan-2-ol (6b):** The general procedure B was followed using 1-*o*-tolyl-1H-pyrazole (31.6 mg, 0.200 mmol, 1.00 equiv), 3-methyloct-1-ene (49.7 mg, 0.400 mmol, 2.00 equiv) and 2-benzyloxyacetaldehyde (90.1 mg, 0.600 mmol, 3.00 equiv). Purification by silica gel chromatography (20% ethyl acetate in hexane) provided the product **6b** (56.9 mg, 66% yield, >20:1 *dr*) as a clear oil. IR (neat): 3431, 2928, 2860, 1469, 1392, 1088 cm<sup>-1</sup>. <sup>1</sup>H NMR (500 MHz, CDCl<sub>3</sub>): δ 7.75-7.72 (m, 1H), 7.40-7.39 (m, 2H), 7.36-7.26 (m, 6H), 7.18-7.17 (m, 1H), 6.44-6.42 (m, 1H),

6.13 (d, *J* = 16.4 Hz, 1H), 5.65 (d, *J* = 16.4 Hz, 1H), 4.53 (d, *J* = 11.6 Hz, 1H), 4.49 (d, *J* = 11.6 Hz, 1H), 3.60 (dd, *J* = 8.9, 2.7 Hz, 1H), 3.53 (dd, *J* = 8.9, 2.7 Hz, 1H), 3.30 (t, *J* = 8.9 Hz, 1H), 2.45 (bs, 1H), 2.04 (s, 3H), 1.45-1.39 (m, 2H), 1.31-1.23 (m, 2H), 1.23-1.13 (m, 3H), 1.11-1.02 (m, 1H), 0.92-0.81 (m, 6H). <sup>13</sup>C NMR (126 MHz, CDCl<sub>3</sub>): δ 140.1, 138.6, 138.0, 137.5, 136.5, 136.2, 131.5, 129.11, 129.05, 128.4, 127.73, 127.70, 124.0, 123.8, 105.9, 76.1, 73.3, 71.4, 42.7, 37.3, 32.6, 23.4, 22.7, 19.0, 17.3, 14.1. HRMS (ESI/[M+H]<sup>+</sup>) calcd. for C<sub>28</sub>H<sub>37</sub>N<sub>2</sub>O<sub>2</sub><sup>+</sup>, 433.2850. Found [M+H]<sup>+</sup>, 433.2856.

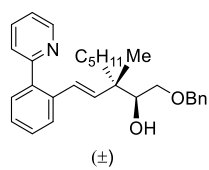

**(±)-(2S,3S)-1-(Benzyloxy)-3-methyl-3-((E)-2-(pyridin-2-yl)styryl)octan-2-ol (6c):** The general procedure B was followed using 2-phenylpyridine (31.0 mg, 0.200 mmol, 1.00 equiv), 3-methyloct-1-ene (49.7 mg, 0.400 mmol, 2.00 equiv) and 2-benzyloxyacetaldehyde (90.1 mg, 0.600 mmol, 3.00 equiv). Purification by silica gel chromatography (20% ethyl acetate in hexane) provided the product **6c** (44.0 mg, 51% yield, >20:1 *dr*) as a yellow oil. IR (neat): 3411, 2928, 2859, 1585, 1454, 1424, 1091 cm<sup>-1</sup>. <sup>1</sup>H NMR (400 MHz, CDCl<sub>3</sub>): δ 8.71-8.70 (m, 1H), 7.70 (td, *J* = 7.7, 1.9 Hz, 1H), 7.53-7.50 (m, 2H), 7.46-7.43 (m, 1H), 7.37-7.29 (m, 7H), 7.26-7.22 (m, 1H), 6.43 (d, *J* = 16.3 Hz, 1H), 6.13 (d, *J* = 16.3 Hz, 1H), 4.58 (d, *J* = 11.8 Hz, 1H), 4.53 (d, *J* = 11.8 Hz, 1H), 3.70-3.62 (m, 2H), 3.43 (t, 8.9 Hz, 1H), 2.74 (bs, 1H), 1.50-1.47 (m, 2H), 1.33-1.20 (m, 6H), 0.97 (s, 3H), 0.88 (t, *J* = 7.0 Hz, 3H). <sup>13</sup>C NMR (101 MHz, CDCl<sub>3</sub>): δ 159.0, 149.5, 138.8, 138.2, 137.4, 136.8, 136.0, 129.9, 128.7, 128.5, 127.8, 127.3, 127.0, 124.9, 121.9, 76.5, 73.5, 71.6, 43.1, 37.7, 32.7, 23.8, 22.8, 19.2, 14.2 (2 aromatic peaks overlap). HRMS (ESI/[M+H]<sup>+</sup>) calcd. for C<sub>29</sub>H<sub>36</sub>NO<sub>2</sub><sup>+</sup>, 430.2741. Found [M+H]<sup>+</sup>, 430.2727.

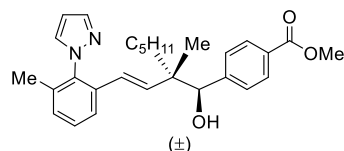

**(±)-Methyl 4-((1S,2S)-1-hydroxy-2-methyl-2-((E)-3-methyl-2-(1H-pyrazol-1-yl)styryl)heptyl)benzoate (6d):** The general procedure B was followed using 1-*o*-tolyl-1H-pyrazole (31.6 mg, 0.200 mmol, 1.00 equiv), 3-methyloct-1-ene (49.7 mg, 0.400 mmol, 2.00 equiv) and methyl 4-formylbenzoate (26.4 mg, 0.600 mmol, 3.00 equiv). Purification by silica gel chromatography (20% ethyl acetate in hexane) provided the product **6d** (58.5 mg, 55% yield, >20:1 *dr*) as a clear oil. IR (neat): 3413, 2962, 2931, 2858, 1720, 1468, 1275, 1104, 1018 cm<sup>-1</sup>. <sup>1</sup>H NMR (400 MHz, CDCl<sub>3</sub>): δ

7.92-7.89 (m, 2H), 7.69-6.63 (m, 1H), 7.37-7.32 (m, 2H), 7.31-7.21 (m, 3H), 7.17-7.15 (m, 1H), 6.39-6.33 (m, 1H), 5.93 (d, *J* = 16.3 Hz, 1H), 5.61 (d, *J* = 16.3 Hz, 1H), 4.31 (s, 1H), 3.87 (s, 3H), 2.74 (bs, 1H), 2.00 (s, 3H), 1.42-1.32 (m, 1H), 1.25-1.05 (m, 7H), 0.81 (t, *J* = 7.2, 3H), 0.71 (s, 3H). <sup>13</sup>C NMR (101 MHz, CDCl<sub>3</sub>): δ 167.1, 146.2, 140.2, 138.7, 137.4, 136.3, 136.1, 131.5, 129.4, 129.1, 129.0, 128.6, 128.0, 125.9, 123.9, 106.0, 80.1, 52.0, 45.5, 37.6, 32.5, 23.8, 22.6, 17.4, 17.3, 14.1. HRMS (ESI/[M+H]<sup>+</sup>) calcd. for C<sub>28</sub>H<sub>35</sub>N<sub>2</sub>O<sub>3</sub><sup>+</sup>, 447.2642. Found [M+H]<sup>+</sup>, 447.2645.

## SUPPORTING INFORMATION

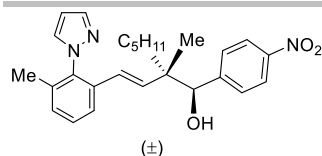**(±)-(1S,2S)-2-Methyl-2-((E)-3-methyl-2-(1H-pyrazol-1-yl)styryl)-1-(4-nitrophenyl)heptan-1-ol (6e):**

The general procedure B was followed using 1-*o*-tolyl-1*H*-pyrazole (31.6 mg, 0.200 mmol, 1.00 equiv), 3-methyleneoct-1-ene (49.7 mg, 0.400 mmol, 2.00 equiv) and 4-nitrobenzaldehyde (90.7 mg, 0.600 mmol, 3.00 equiv). Purification by silica gel chromatography (30% ethyl acetate in hexane) provided the product **6e** (52.0 mg, 60% yield, >20:1 *dr*) as a yellow oil. IR (neat): 3290, 2930, 2560, 1515, 1466, 1294, 1048 cm<sup>-1</sup>. <sup>1</sup>H NMR (400 MHz, CDCl<sub>3</sub>) δ 8.10 (d, *J* = 8.4 Hz, 2H), 7.70-7.68 (m, 1H), 7.40-7.35 (m, 4H), 7.33-7.30 (m, 1H), 7.21-7.19 (m, 1H), 6.43-6.39 (m, 1H), 5.92 (d, *J* = 16.4 Hz, 1H), 5.64 (d, *J* = 16.4 Hz, 1H), 4.37 (s, 1H), 2.02 (s, 3H), 1.42-1.36 (m, 1H), 1.26-1.09 (m, 7H), 0.84 (t, *J* = 7.0 Hz, 3H), 0.73 (s, 3H). <sup>13</sup>C NMR (101 MHz, CDCl<sub>3</sub>) δ 148.2, 147.2, 140.3, 138.2, 137.5, 136.11, 136.09, 131.4, 129.6, 129.2, 128.8, 126.8, 124.0, 122.6, 106.2, 79.7, 45.7, 37.8, 32.5, 23.8, 22.6, 17.3, 17.1, 14.0. HRMS (ESI/[M+H]<sup>+</sup>) calcd. for C<sub>26</sub>H<sub>32</sub>N<sub>3</sub>O<sub>3</sub><sup>+</sup>, 434.2438. Found [M+H]<sup>+</sup>, 434.2428.

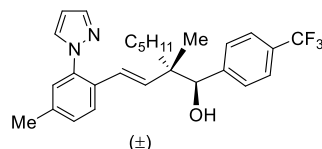**(±)-(1S,2S)-2-Methyl-2-((E)-4-methyl-2-(1H-pyrazol-1-yl)styryl)-1-(4-(trifluoromethyl)phenyl)heptan-1-ol (6f):**

The general procedure B was followed using 1-*m*-tolyl-1*H*-pyrazole (31.6 mg, 0.200 mmol, 1.00 equiv), 3-methyleneoct-1-ene (49.7 mg, 0.400 mmol, 2.00 equiv) and 4-(trifluoromethyl)benzaldehyde (104 mg, 0.600 mmol, 3.00 equiv). Purification by silica gel chromatography (20% ethyl acetate in hexane) provided the product **6f** (50.2 mg, 55% yield, >20:1 *dr*) as a clear oil. IR (neat): 3390, 2927, 2859, 1323, 1122, 1066 cm<sup>-1</sup>. <sup>1</sup>H NMR (400 MHz, CDCl<sub>3</sub>) δ 7.70-7.66 (m, 1H), 7.54-7.50 (m, 3H), 7.44-7.37 (m, 3H), 7.19-7.17 (m, 2H), 6.37 (t, *J* = 2.1 Hz, 1H), 6.14 (d, *J* = 16.3 Hz, 1H), 5.97 (d, *J* = 16.3 Hz, 1H), 4.44 (s, 1H), 3.23 (bs, 1H), 2.39 (s, 3H), 1.56-1.46 (m, 1H), 1.30-1.16 (s, 7H), 0.92-0.81 (m, 6H). <sup>13</sup>C NMR (101 MHz, CDCl<sub>3</sub>) δ 145.3, 140.8, 138.2, 138.0, 137.7, 130.9, 130.6, 129.5 (q, *J* = 32.6 Hz), 129.2, 128.4, 127.4, 127.2, 126.1, 124.38 (q, *J* = 3.76 Hz), 124.35 (q, *J* = 269.8 Hz), 106.6, 80.3, 45.7, 38.1, 32.7, 24.1, 22.8, 21.1, 17.8, 14.2. <sup>19</sup>F NMR (470 MHz, CDCl<sub>3</sub>) δ -62.4. HRMS (ESI/[M+H]<sup>+</sup>) calcd. for C<sub>27</sub>H<sub>32</sub>F<sub>3</sub>N<sub>2</sub>O<sup>+</sup>, 457.2467. Found [M+H]<sup>+</sup>, 457.2483.

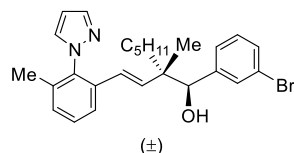**(±)-(1S,2S)-1-(3-Bromophenyl)-2-methyl-2-((E)-3-methyl-2-(1H-pyrazol-1-yl)styryl)heptan-1-ol (6g):**

The general procedure B was followed using 1-*o*-tolyl-1*H*-pyrazole (31.6 mg, 0.200 mmol, 1.00 equiv), 3-methyleneoct-1-ene (49.7 mg, 0.400 mmol, 2.00 equiv) and 3-bromobenzaldehyde (111 mg, 0.600 mmol, 3.00 equiv). Purification by silica gel chromatography (30% ethyl acetate in hexane) provided the product **6g** (50.5 mg, 54% yield, >20:1 *dr*) as a white solid (mp: 52-54 °C). IR (neat): 3311, 2929, 2856, 1738, 1467, 1228, 1045 cm<sup>-1</sup>. <sup>1</sup>H NMR (400 MHz, CDCl<sub>3</sub>) δ 7.73-7.71 (m, 1H), 7.41-7.31 (m, 5H), 7.21-7.13 (m, 3H), 6.43-4.37 (m, 1H), 5.95 (d, *J* = 16.4 Hz, 1H), 5.66 (d, *J* = 16.4 Hz, 1H), 4.26 (s, 1H), 2.54 (bs, 1H), 2.05 (s, 3H), 1.41-1.35 (m, 1H), 1.26-1.16 (m, 7H), 0.85 (t, *J* = 7.1 Hz, 3H), 0.75 (s, 3H). <sup>13</sup>C NMR (101 MHz, CDCl<sub>3</sub>) δ 143.3, 140.4, 138.9, 137.6, 136.5, 136.2, 131.6, 131.1, 130.5, 129.6, 129.3, 129.1, 126.8, 126.2, 124.2, 121.8, 106.2, 80.0, 45.7, 37.8, 32.7, 24.0, 22.8, 17.5, 17.4, 14.2. HRMS (ESI/[M+H]<sup>+</sup>) calcd. for C<sub>26</sub>H<sub>32</sub>BrN<sub>2</sub>O<sup>+</sup>, 467.1693. Found [M+H]<sup>+</sup>, 467.1722.

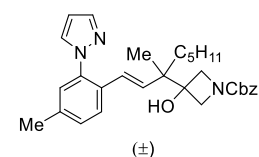**(±)-Benzyl-(E)-3-hydroxy-3-(3-methyl-1-(4-methyl-2-(1H-pyrazol-1-yl)phenyl)oct-1-en-3-yl)azetidine-1-carboxylate (6h):**

The general procedure B was followed using 1-*m*-tolyl-1*H*-pyrazole (31.6 mg, 0.200 mmol, 1.00 equiv), 3-methyleneoct-1-ene (49.7 mg, 0.400 mmol, 2.00 equiv) and benzyl 3-oxoazetidine-1-carboxylate (123 mg, 0.600 mmol, 3.00 equiv). Purification by silica gel chromatography (35% ethyl acetate in hexane) provided the product **6h** (80.0 mg, 82% yield) as a yellow oil. IR (neat): 3400, 2955, 1704, 1417, 1353, 1096 cm<sup>-1</sup>. <sup>1</sup>H NMR (600 MHz, CDCl<sub>3</sub>) δ 7.71-7.70 (m, 1H), 7.61-7.60 (m, 1H), 7.37-7.27 (m, 6H), 7.16-7.15 (m, 2H), 6.42 (t, *J* = 2.2 Hz, 1H), 6.22 (d, *J* = 16.2 Hz, 1H), 5.86 (d, *J* = 16.2 Hz, 1H), 5.06 (s, 2H), 4.13-4.05 (m, 2H), 3.76-3.72 (m, 2H), 3.47 (bs, 1H), 2.37 (s, 3H), 1.55-1.48 (m, 1H), 1.43-1.38 (m, 1H), 1.33-1.13 (m, 6H), 0.99 (s, 3H), 0.87 (t, *J* = 7.1 Hz, 3H). <sup>13</sup>C NMR (151 MHz, CDCl<sub>3</sub>) δ 156.4, 140.8, 138.4, 137.9, 136.7, 135.0, 131.0, 130.6, 129.3, 128.5, 128.3, 128.1, 128.0, 127.4, 126.1, 106.7, 75.9, 66.8, 59.2 and 58.9 (two carbamate conformers), 58.5 and 58.3 (two carbamate conformers), 44.7, 34.4, 32.7, 24.2, 22.7, 21.0, 16.9, 14.2. HRMS (ESI/[M+H]<sup>+</sup>) calcd. for C<sub>30</sub>H<sub>38</sub>N<sub>3</sub>O<sup>+</sup>, 488.2908. Found [M+H]<sup>+</sup>, 488.2922.

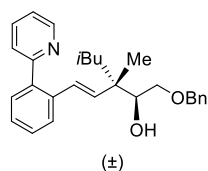**(±)-(2S,3S)-1-(Benzyloxy)-3,5-dimethyl-3-((E)-2-(pyridin-2-yl)styryl)hexan-2-ol (6i):**

The general procedure C was followed using 2-phenylpyridine (31.0 mg, 0.200 mmol, 1.00 equiv), 5-methyl-3-methylenehex-1-ene (44.1 mg, 0.400 mmol, 2.00 equiv) and 2-benzyloxyacetaldehyde (90.1 mg, 0.600 mmol, 3.00 equiv). Purification by silica gel chromatography (20% ethyl acetate in hexane) provided the product **6i** (40.2 mg, 49% yield, >20:1 *dr*) as a yellow oil. IR (neat): 3434, 2951, 2866, 1584, 1460, 1090 cm<sup>-1</sup>. <sup>1</sup>H NMR (400 MHz, CDCl<sub>3</sub>) δ 8.73-8.69 (m, 1H), 7.69 (td, *J* = 7.7, 1.8 Hz, 1H), 7.50 (dd, *J* = 7.2, 1.9 Hz, 2H), 7.44-7.42 (m, 7H), 7.37-7.28 (m, 1H), 7.26-

7.22 (m, 1H), 6.42 (d, *J* = 16.3 Hz, 1H), 6.14 (d, *J* = 16.3 Hz, 0.94H, major), 6.04 (d, *J* = 16.3 Hz, 0.06H, minor), 4.58 (d, *J* = 11.8 Hz, 1H), 4.53 (d, *J* = 11.8 Hz, 1H), 3.65-3.61 (m, 2H), 3.41 (t, *J* = 9.9 Hz, 1H), 2.79 (bs, 1H), 1.71-1.62 (m, 1H), 1.52-1.38 (m, 2H), 1.00 (s, 3H), 0.92 (d, *J* = 6.7 Hz, 3H), 0.88 (d, *J* = 6.7 Hz, 3H). <sup>13</sup>C NMR (101 MHz, CDCl<sub>3</sub>) δ 159.0, 149.5, 138.8, 138.2, 138.0, 136.8, 136.1, 129.9, 128.8, 128.6, 127.8, 127.3, 126.9, 124.8, 121.9, 77.3, 73.5, 71.5, 46.6, 43.8, 25.5, 25.1, 24.5, 19.0 (2 aromatic peaks overlap). HRMS (ESI/[M+H]<sup>+</sup>) calcd. for C<sub>28</sub>H<sub>34</sub>NO<sub>2</sub><sup>+</sup>, 416.2584. Found [M+H]<sup>+</sup>, 416.2591.

## SUPPORTING INFORMATION

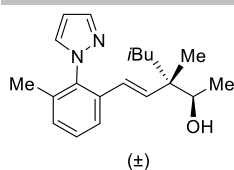

**(±)-(2R,3S)-3,5-Dimethyl-3-((E)-3-methyl-2-(1H-pyrazol-1-yl)styryl)hexan-2-ol (6j):** The general procedure C was followed using 1-*o*-tolyl-1*H*-pyrazole (31.6 mg, 0.200 mmol, 1.00 equiv), 5-methyl-3-methylene-hex-1-ene (44.1 mg, 0.400 mmol, 2.00 equiv) and acetaldehyde (26.4 mg, 0.600 mmol, 3.00 equiv). Purification by silica gel chromatography (20% ethyl acetate in hexane) provided the product **6j** as a mixture of diastereomers (26.8 mg, 43% yield, 3:1 *dr*) as a yellow oil. IR (neat): 3394, 2952, 2866, 1467, 1392  $\text{cm}^{-1}$ .  $^1\text{H}$  NMR (500 MHz,  $\text{CDCl}_3$ )  $\delta$  7.74-7.73 (m, 1H), 7.46-7.45 (m, 1H), 7.38-7.35 (m, 1H), 7.32-7.29 (m, 1H), 7.19-7.17 (m, 1H), 6.46 (t,  $J = 2.1$  Hz, 1H), 5.96 (d,  $J = 16.3$  Hz, 0.25H, minor) 5.95 (d,  $J = 16.3$  Hz, 0.75H, major), 5.72 (d,  $J = 16.3$  Hz, 0.75H, major), 5.68 (d,  $J = 16.3$  Hz, 0.25H, minor) 3.41 (q,  $J = 6.3$  Hz, 1H), 2.04 (s, 3H), 1.81 (bs, 1H), 1.60-1.53 (m, 1H), 1.31-1.22 (m, 2H), 1.04 (d,  $J = 6.4$  Hz, 3H), 0.93-0.79 (m, 9H).  $^{13}\text{C}$  NMR (126 MHz,  $\text{CDCl}_3$ )  $\delta$  140.30, 140.28, 139.6, 137.5, 136.7, 136.6, 136.2, 136.1, 131.4, 129.24, 129.16, 129.1, 125.2, 124.6, 123.9, 123.8, 106.11, 106.09, 74.9, 73.9, 46.7, 46.4, 45.3, 44.9, 25.3, 25.2, 24.8, 24.58, 24.54, 24.46, 18.3, 18.2, 17.3, 16.9, 16.7. HRMS (ESI/[M+H]<sup>+</sup>) calcd. for  $\text{C}_{20}\text{H}_{29}\text{N}_2\text{O}^+$ , 313.2274. Found [M+H]<sup>+</sup>, 313.2269.

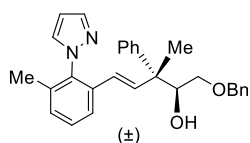

**(±)-(2S,3R,E)-1-(Benzyloxy)-3-methyl-5-(3-methyl-2-(1H-pyrazol-1-yl)phenyl)-3-phenylpent-4-en-2-ol (6k):** The general procedure C was followed using 1-*o*-tolyl-1*H*-pyrazole (31.6 mg, 0.200 mmol, 1.00 equiv), 2-phenyl-1,3-butadiene (52.1 mg, 0.400 mmol, 2.00 equiv) and 2-benzyloxyacetaldehyde (90.1 mg, 0.600 mmol, 3.00 equiv). Purification by silica gel chromatography (35% ethyl acetate in hexane) provided the product **6k** as a mixture of diastereomers (28.0 mg, 35% yield, 3:1 *dr*) as a yellow oil. IR (neat): 3425, 3030, 2921, 1681, 1453, 1110  $\text{cm}^{-1}$ .  $^1\text{H}$  NMR (500 MHz,  $\text{CDCl}_3$ )  $\delta$  7.73-7.71 (m, 1H), 7.48-7.26 (m, 12H), 7.23-7.19 (m, 2H), 6.56 (d,  $J = 16.4$  Hz, 0.75H, major), 4.50-4.45 (m, 2H), 4.28-4.22 (m, 0.75H, major), 4.18-4.13 (m, 0.25H, minor), 3.57-3.52 (m, 0.25H, minor), 3.46-3.42 (m, 0.75H, major), 3.33 (q,  $J = 9.3$  Hz, 0.25H, minor), 3.31 (q,  $J = 9.3$  Hz, 0.75H, major), 2.38 (bs, 1H), 2.06 (s, 2.25H, major), 2.05 (s, 0.75H, minor), 1.35 (s, 0.75H, minor) and 1.26 (s, 2.25H, major).  $^{13}\text{C}$  NMR (126 MHz,  $\text{CDCl}_3$ )  $\delta$  145.2, 145.1, 140.4, 140.3, 138.11, 138.07, 137.93, 137.86, 137.84, 137.82, 136.5, 136.43, 136.39, 136.3, 131.62, 131.59, 129.6, 129.5, 129.3, 129.2, 128.54, 128.52, 128.4, 127.84, 127.80, 127.1, 127.0, 126.55, 126.50, 125.2, 124.8, 124.1, 124.0, 106.2, 106.1, 76.3, 75.8, 73.47, 73.46, 71.8, 71.6, 47.9, 47.7, 21.7, 21.3, 17.5 (both diastereomers listed). HRMS (ESI/[M+H]<sup>+</sup>) calcd. for  $\text{C}_{29}\text{H}_{31}\text{N}_2\text{O}_2^+$ , 439.2380. Found [M+H]<sup>+</sup>, 439.2366.

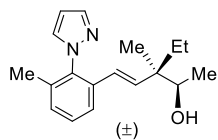

**(±)-(2R,3R,E)-3-Ethyl-3-methyl-5-(3-methyl-2-(1H-pyrazol-1-yl)phenyl)pent-4-en-2-ol (8a):** The general procedure C was followed using 1-*o*-tolyl-1*H*-pyrazole (31.6 mg, 0.200 mmol, 1.00 equiv), 3-methyl-1,3-pentadiene (32.9 mg, 0.400 mmol, 2.00 equiv) and acetaldehyde (26.4 mg, 0.600 mmol, 3.00 equiv). Purification by silica gel chromatography (20% ethyl acetate in hexane) provided the product **8a** (28.0 mg, 49% yield, >20:1 *dr*) as a clear oil. IR (neat): 3377, 2967, 2877, 1515, 1471, 1392  $\text{cm}^{-1}$ .  $^1\text{H}$  NMR (400 MHz,  $\text{CDCl}_3$ )  $\delta$  7.75-7.73 (m, 1H), 7.45-7.44 (m, 1H), 7.40-7.38 (m, 1H), 7.31-7.28 (m, 1H), 7.19-7.17 (m, 1H), 6.46-6.44 (m, 1H), 5.88 (d,  $J = 16.5$  Hz, 1H), 5.70 (d,  $J = 16.5$  Hz, 1H), 3.50 (q,  $J = 6.4$  Hz, 1H), 2.04 (s, 3H), 1.78 (bs, 1H), 1.46-1.32 (m, 2H), 1.05 (d,  $J = 6.4$  Hz, 3H), 0.86 (s, 3H), 0.75 (t,  $J = 7.5$  Hz, 3H).  $^{13}\text{C}$  NMR (101 MHz,  $\text{CDCl}_3$ )  $\delta$  140.3, 138.8, 137.6, 136.8, 136.4, 131.6, 129.3, 129.2, 125.4, 124.0, 106.2, 74.0, 44.9, 29.5, 18.3, 17.8, 17.4, 8.5. HRMS (ESI/[M+H]<sup>+</sup>) calcd. for  $\text{C}_{18}\text{H}_{25}\text{N}_2\text{O}^+$ , 285.1961. Found [M+H]<sup>+</sup>, 285.1960.

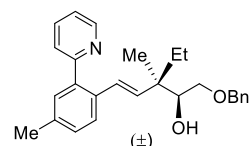

**(±)-Methyl 4-((1S,2R,E)-2-ethyl-1-hydroxy-2-methyl-4-(4-methyl-2-(pyridin-2-yl)phenyl)but-3-en-1-yl)benzoate (8b):** The general procedure C was followed using 2-(3-methylphenyl)pyridine (33.8 mg, 0.200 mmol, 1.00 equiv), 3-methyl-1,3-pentadiene (32.9 mg, 0.400 mmol, 2.00 equiv), and 2-benzyloxyacetaldehyde (90.1 mg, 0.600 mmol, 3.00 equiv). Purification by silica gel chromatography (20% ethyl acetate in hexane) provided a yellow oil containing the product. This material was further purified by using a C-18-reverse phase column, with a gradient of 0 to 40% acetonitrile buffered with 0.1% of TFA in  $\text{H}_2\text{O}$  buffered with 0.1% of TFA. Fractions containing the product were combined and diluted with sat. aq.  $\text{NaHCO}_3$  (50 mL) and extracted with ethyl acetate (3 x 40 mL). The combined organic layers were then washed with brine (50 mL), dried over  $\text{Na}_2\text{SO}_4$ , and concentrated to afford product **8b** (55.2 mg, 69% yield, 93:7 *dr*) as a yellow oil. IR (neat): 3402, 2965, 1718, 1586, 1453, 1377, 1077  $\text{cm}^{-1}$ .  $^1\text{H}$  NMR (500 MHz,  $\text{CDCl}_3$ )  $\delta$  8.72-8.71 (m, 1H), 7.70-7.66 (m, 1H), 7.44-7.29 (m, 8H), 7.25-7.22 (m, 1H), 7.19-7.17 (m, 1H), 6.40 (d,  $J = 16.2$  Hz, 1H), 6.08 (d,  $J = 16.2$  Hz, 0.07H), 5.96 (d,  $J = 16.2$  Hz, 0.93H), 4.53 (s, 2H), 3.70 (dd,  $J = 9.6, 2.6$  Hz, 1H), 3.62 (dd,  $J = 9.6, 2.6$  Hz, 1H), 3.43 (t,  $J = 9.0$  Hz, 1H), 2.80 (bs, 1H), 2.40 (s, 3H), 1.59-1.50 (m, 2H), 0.98 (s, 2.79H, major), 0.94 (s, 0.21H, minor), 0.84 (t,  $J = 7.4$  Hz, 3H).  $^{13}\text{C}$  NMR (101 MHz,  $\text{CDCl}_3$ )  $\delta$  158.9, 149.3, 138.5, 138.2, 137.1, 136.2, 136.0, 133.8, 130.6, 129.5, 128.54, 128.47, 127.81, 127.78, 126.8, 125.1, 121.9, 76.2, 73.5, 71.9, 43.2, 30.7, 21.2, 17.9, 8.4. HRMS (ESI/[M+H]<sup>+</sup>) calcd. for  $\text{C}_{27}\text{H}_{32}\text{NO}_2^+$ , 402.2428. Found [M+H]<sup>+</sup>, 402.2439.

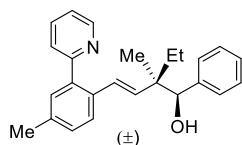

**(±)-(1S,2R,E)-2-Ethyl-2-methyl-4-(4-methyl-2-(pyridin-2-yl)phenyl)-1-phenylbut-3-en-1-ol (8c):** The general procedure C was followed using 2-(3-methylphenyl)pyridine (33.8 mg, 0.200 mmol, 1.00 equiv), 3-methyl-1,3-pentadiene (32.9 mg, 0.400 mmol, 2.00 equiv) and benzaldehyde (63.7 mg, 0.600 mmol, 3.00 equiv). Purification by silica gel chromatography (20% ethyl acetate in hexane) provided the product **8c** (41.3 mg, 58% yield, 88:12 *dr*) as a yellow oil. IR (neat): 3382, 2965, 1736, 1587, 1462, 1240, 1040  $\text{cm}^{-1}$ .  $^1\text{H}$  NMR (600 MHz,  $\text{CDCl}_3$ )  $\delta$  8.68-8.67 (m, 1H), 7.65 (td,  $J = 7.7, 1.8$  Hz, 0.12H, minor), 7.62 (td,  $J = 7.7, 1.8$  Hz, 0.88H), 7.45-7.44 (m, 0.12H, minor), 7.39-7.38 (m, 0.88H), 7.35-7.34 (m, 1H), 7.31-7.18 (m, 8H), 6.43 (d,  $J = 16.3$  Hz, 0.12H, minor), 6.38 (d,  $J = 16.3$  Hz, 0.88H, major), 5.98 (d,  $J = 16.3$  Hz, 0.12H, minor), 5.86 (d,  $J = 16.3$  Hz, 0.88H, major), 4.48 (s, 1H), 3.12 (bs, 1H), 2.39 (s, 3H), 1.48-1.35 (m, 2H), 1.06 (s, 2.64H, major), 0.85 (s, 0.36H, minor), 0.82 (t,  $J = 7.5$  Hz, 0.36H, minor), 0.81 (t,  $J = 7.5$  Hz, 2.64H, major).  $^{13}\text{C}$  NMR (151

## SUPPORTING INFORMATION

MHz, CDCl<sub>3</sub>)  $\delta$  158.6, 149.2, 141.8, 138.0, 137.1, 136.2, 135.4, 134.1, 130.7, 130.4, 129.5, 128.1, 127.8, 127.5, 127.11, 127.08, 124.6, 121.8, 81.5, 45.7, 29.7, 21.2, 19.2, 8.7. HRMS (ESI/[M+H]<sup>+</sup>) calcd. for C<sub>25</sub>H<sub>28</sub>NO<sup>+</sup>, 358.2165. Found [M+H]<sup>+</sup>, 358.2160.

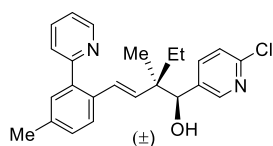

**(±)-(1S,2R,E)-1-(6-Chloropyridin-3-yl)-2-ethyl-2-methyl-4-(4-methyl-2-(pyridin-2-yl)phenyl)but-3-en-1-ol (8d):**

The general procedure C was followed using 2-(3-methylphenyl)pyridine (33.8 mg, 0.200 mmol, 1.00 equiv), 3-methyl-1,3-pentadiene (32.9 mg, 0.400 mmol, 2.00 equiv) and 6-chloronicotinaldehyde (84.9 mg, 0.600 mmol, 3.00 equiv). Purification by silica gel chromatography (20% ethyl acetate in hexane) provided the product **8d** (70.0 mg, 90% yield, 94:6 *dr*) as a yellow oil. IR (neat): 3338, 2967, 2328, 1736, 1585, 1455, 1373, 1204, cm<sup>-1</sup>. <sup>1</sup>H NMR (600 MHz, CDCl<sub>3</sub>)  $\delta$  8.66-8.64 (m, 1H), 8.28 (d, *J* = 2.4 Hz, 1H), 7.76-7.73 (m, 1H), 7.59 (dd, *J* = 8.3, 2.5 Hz, 1H), 7.42 (d, *J* = 7.8 Hz, 1H), 7.35 (d, *J* = 7.8 Hz, 1H), 7.33-7.31 (m, 1H), 7.27-7.25 (m, 1H), 7.23-7.19 (m, 2H), 6.49 (d, *J* = 16.3 Hz, 1H), 5.86 (d, *J* = 16.3 Hz, 0.06H, minor), 5.72 (d, *J* = 16.3 Hz, 0.94H, major), 4.49 (s, 1H), 3.87 (bs, 1H), 2.41 (s, 3H), 1.45-1.29 (m, 2H), 1.07 (s, 3H), 0.83 (t, *J* = 7.4 Hz, 3H). <sup>13</sup>C NMR (151 MHz, CDCl<sub>3</sub>)  $\delta$  158.8, 150.2, 149.1, 149.0, 138.2, 137.7, 137.5, 136.9, 136.3, 134.4, 134.1, 132.5, 130.6, 129.8, 127.3, 124.5, 123.4, 122.1, 78.9, 45.7, 29.2, 21.3, 19.6, 8.7. HRMS (ESI/[M+H]<sup>+</sup>) calcd. for C<sub>24</sub>H<sub>26</sub>ClN<sub>2</sub>O<sup>+</sup>, 393.1728. Found [M+H]<sup>+</sup>, 393.1719.

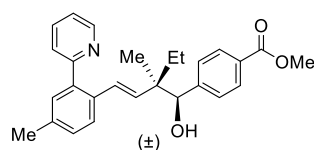

**(±)-Methyl 4-((1S,2R,E)-2-ethyl-1-hydroxy-2-methyl-4-(4-methyl-2-(pyridin-2-yl)phenyl)but-3-en-1-yl)benzoate (8e):**

The general procedure C was followed using 2-(3-methylphenyl)pyridine (33.8 mg, 0.200 mmol, 1.00 equiv), 3-methyl-1,3-pentadiene (32.9 mg, 0.400 mmol, 2.00 equiv), and methyl 4-formylbenzoate (98.5 mg, 0.600 mmol, 3.00 equiv). Purification by silica gel chromatography (20% ethyl acetate in hexane) provided a yellow oil containing the product. This material was further purified by using a C-18-reverse phase column, with a gradient of 0 to 40% acetonitrile buffered with 0.1% of TFA in H<sub>2</sub>O buffered with 0.1% of TFA. Fractions containing the product were combined and diluted with sat. aq. NaHCO<sub>3</sub> (50 mL) and extracted with ethyl acetate (3 × 40 mL). The combined organic layers were then washed with brine (50 mL), dried over Na<sub>2</sub>SO<sub>4</sub>, and concentrated to afford product **8e** (64.1 mg, 77% yield, 88:12 *dr*) as a yellow oil. IR (neat): 3310, 2965, 2324, 1718, 1609, 1587, 1434, 1275, 1103 cm<sup>-1</sup>. <sup>1</sup>H NMR (400 MHz, CDCl<sub>3</sub>)  $\delta$  8.65-8.63 (m, 1H), 7.92-7.89 (m, 2H), 7.63-7.59 (m, 1H), 7.36-7.26 (m, 5H), 7.21-7.16 (m, 2H), 6.37 (d, *J* = 16.4 Hz, 1H), 5.92 (d, *J* = 15.5 Hz, 0.12H), 5.78 (d, *J* = 16.4 Hz, 0.88H), 4.48 (s, 1H), 3.86 (s, 3H), 2.37 (s, 3H), 1.44-1.32 (m, 2H), 1.02 (s, 3H), 0.79 (t, *J* = 6.6 Hz, 3H). <sup>13</sup>C NMR (101 MHz, CDCl<sub>3</sub>)  $\delta$  167.1, 158.6, 149.0, 147.2, 137.8, 137.1, 136.3, 135.0, 134.0, 130.9, 130.4, 129.6, 128.9, 128.7, 127.8, 127.0, 124.5, 121.9, 81.0, 52.0, 45.7, 29.5, 21.1, 19.2, 8.6. HRMS (ESI/[M+H]<sup>+</sup>) calcd. for C<sub>27</sub>H<sub>30</sub>NO<sub>3</sub><sup>+</sup>, 416.2220. Found [M+H]<sup>+</sup>, 416.2220.

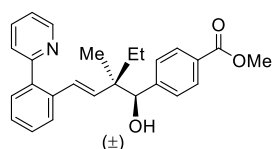

**(±)-Methyl 4-((1S, 2R, E)-2-ethyl-1-hydroxy-2-methyl-4-(2-(pyridin-2-yl)phenyl)but-3-en-1-yl)benzoate (8f):**

The general procedure C was followed using 2-phenylpyridine (31.0 mg, 0.200 mmol, 1.00 equiv), 3-methyl-1,3-pentadiene (32.9 mg, 0.400 mmol, 2.00 equiv) and methyl 4-formylbenzoate (98.5 mg, 0.600 mmol, 3.00 equiv). Purification by silica gel chromatography (20% ethyl acetate in hexane) provided the product as a yellow oil. This material was further purified by using a C-18-reverse phase column, with a gradient of 0 to 40% acetonitrile buffered with 0.1% of TFA in H<sub>2</sub>O buffered with 0.1% of TFA. Fractions containing the product were combined and diluted with sat. aq. NaHCO<sub>3</sub> (50 mL) and extracted with ethyl acetate (3 × 40 mL). The combined organic layers were then washed with brine (50 mL), dried over Na<sub>2</sub>SO<sub>4</sub>, and concentrated to afford product **8f** (50.0 mg, 62% yield, 93:7 *dr*) as a yellow oil. IR (neat): 3482, 2965, 1718, 1609, 1585, 1460, 1286, 1103 cm<sup>-1</sup>. <sup>1</sup>H NMR (400 MHz, CDCl<sub>3</sub>)  $\delta$  8.68-8.66 (m, 1H), 7.94-7.92 (m, 2H), 7.69-7.65 (m, 1H), 7.52-7.46 (m, 2H), 7.41-7.33 (m, 5H), 7.25-7.21 (m, 1H), 6.47 (d, *J* = 16.2 Hz, 1H), 5.95 (d, *J* = 16.2 Hz, 0.07H, minor), 5.83 (d, *J* = 16.2 Hz, 0.93H, major), 4.52 (s, 1H), 3.89 (s, 3H), 3.80 (bs, 1H), 1.48-1.30 (m, 2H), 1.07 (s, 3H), 0.81 (t, *J* = 7.4 Hz, 3H). <sup>13</sup>C NMR (101 MHz, CDCl<sub>3</sub>)  $\delta$  167.2, 158.7, 149.1, 147.2, 138.0, 137.0, 136.6, 136.0, 131.5, 129.9, 129.03, 128.96, 128.8, 127.9, 127.5, 127.3, 124.6, 122.1, 81.2, 52.2, 45.9, 29.5, 19.5, 8.8. HRMS (ESI/[M+H]<sup>+</sup>) calcd. for C<sub>26</sub>H<sub>28</sub>NO<sub>3</sub><sup>+</sup>, 402.2064. Found [M+H]<sup>+</sup>, 402.2063.

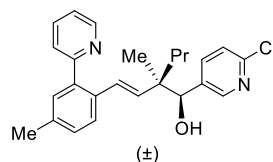

**(±)-(1S,2R)-1-(6-Chloropyridin-3-yl)-2-methyl-2-((E)-4-methyl-2-(pyridin-2-yl)styryl)pentan-1-ol (8g):**

The general procedure C was followed using 2-(3-methylphenyl)pyridine (33.8 mg, 0.200 mmol, 1.00 equiv), 3-methyl-1,3-hexadiene (38.5 mg, 0.400 mmol, 2.00 equiv) and 6-chloronicotinaldehyde (84.9 mg, 0.600 mmol, 3.00 equiv). Purification by silica gel chromatography from gradient of 0% to 40% ethylacetate/hexane gave a yellow oil containing the product. This material was further purified by using a C-18-reverse phase column, with a gradient of 0 to 40% acetonitrile buffered with 0.1% of TFA in H<sub>2</sub>O buffered with 0.1% of TFA. Fractions containing the product were combined and diluted with sat. aq. NaHCO<sub>3</sub> (50 mL) and extracted with ethyl acetate (3 × 40 mL). The combined organic layers were then washed with brine (50 mL), dried over Na<sub>2</sub>SO<sub>4</sub>, and concentrated to afford product **8g** (49.8 mg, 61%, >20:1 *dr*) as a yellow oil. IR (neat): 3242, 2959, 2869, 1585, 1454, 1100 cm<sup>-1</sup>. <sup>1</sup>H NMR (400 MHz, CDCl<sub>3</sub>)  $\delta$  8.65-8.63 (m, 1H), 8.25 (d, *J* = 2.4 Hz, 1H), 7.73 (td, *J* = 7.7, 1.8 Hz, 1H), 7.57 (dd, *J* = 8.3, 2.5 Hz, 1H), 7.39-7.30 (m, 3H), 7.26-7.18 (m, 3H), 6.44 (d, *J* = 16.3 Hz, 1H), 5.74 (d, *J* = 16.3 Hz, 1H), 4.44 (s, 1H), 3.26 (bs, 1H), 2.40 (s, 3H), 1.37-1.23 (m, 4H), 1.06 (s, 3H), 0.89-0.79 (m, 3H). <sup>13</sup>C NMR (101 MHz, CDCl<sub>3</sub>)  $\delta$  158.9, 150.1, 149.1, 149.0, 138.2, 137.9, 137.5, 136.8, 136.3, 134.8, 134.0, 131.7, 130.6, 129.8, 127.2, 124.5, 123.4, 122.1, 78.9, 45.5, 39.2, 21.3, 20.1, 17.7, 15.0. HRMS (ESI/[M+H]<sup>+</sup>) calcd. for C<sub>25</sub>H<sub>28</sub>ClN<sub>2</sub>O<sup>+</sup>, 407.1885. Found [M+H]<sup>+</sup>, 407.1884.

## SUPPORTING INFORMATION

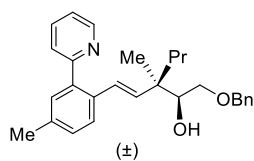

**(±)-(2S,3R)-1-(Benzyloxy)-3-methyl-3-((E)-4-methyl-2-(pyridin-2-yl)styryl)hexan-2-ol (8h):** The general procedure C was followed using 2-(3-methylphenyl)pyridine (33.8 mg, 0.200 mmol, 1.00 equiv), 3-methyl-1,3-hexadiene (38.5 mg, 0.400 mmol, 2.00 equiv), and 2-benzyloxyacetaldehyde (90.1 mg, 0.600 mmol, 3.00 equiv). Purification by silica gel chromatography from gradient of 0% to 40% ethyl acetate in hexane gave a green oil containing the product. This material was further purified by using a C-18-reverse phase column, with a gradient of 0 to 60% acetonitrile buffered with 0.1% of TFA in H<sub>2</sub>O buffered with 0.1% of

TFA. Fractions containing the product were combined and diluted with sat. aq. NaHCO<sub>3</sub> (50 mL) and extracted with ethyl acetate (3 × 40 mL). The combined organic layers were then washed with brine (50 mL), dried over Na<sub>2</sub>SO<sub>4</sub>, and concentrated to afford product **8h** (45.0 mg, 54%, 93:7 *dr*) as a green oil. IR (neat): 3404, 2927, 2868, 1585, 1453 cm<sup>-1</sup>. <sup>1</sup>H NMR (400 MHz, CDCl<sub>3</sub>) δ 8.71-8.70 (m, 1H), 7.71-7.66 (m, 1H), 7.41-7.22 (m, 9H), 7.19-7.16 (m, 1H), 6.37 (d, *J* = 16.2 Hz, 1H), 6.08 (d, *J* = 16.2 Hz, 0.07), 5.97 (d, *J* = 16.2 Hz, 0.93H), 4.53 (s, 2H), 3.67 (dd, *J* = 9.0, 2.6 Hz, 1H), 3.61 (dd, *J* = 9.0, 2.6 Hz, 1H), 3.42 (t, *J* = 9.0 Hz, 1H), 2.59 (bs, 1H), 2.39 (s, 3H), 1.48-1.41 (m, 2H), 1.31-1.21 (m, 2H), 0.99 (s, 2.79H, major), 0.96 (s, 0.21H, minor), 0.87 (t, *J* = 7.2 Hz, 3H). <sup>13</sup>C NMR (101 MHz, CDCl<sub>3</sub>) δ 159.0, 149.4, 138.5, 138.1, 137.1, 136.5, 136.0, 133.7, 130.6, 129.6, 128.6, 128.2, 127.84, 127.81, 126.7, 125.0, 121.9, 76.5, 73.5, 71.9, 43.2, 40.7, 21.2, 18.5, 17.3, 15.0. HRMS (ESI/[M+H]<sup>+</sup>) calcd. for C<sub>28</sub>H<sub>34</sub>NO<sub>2</sub><sup>+</sup>, 416.2584. Found [M+H]<sup>+</sup>, 416.2570.

## SUPPORTING INFORMATION

## V. Mechanism Experiments

## A. Reversibility of C–H bond activation step

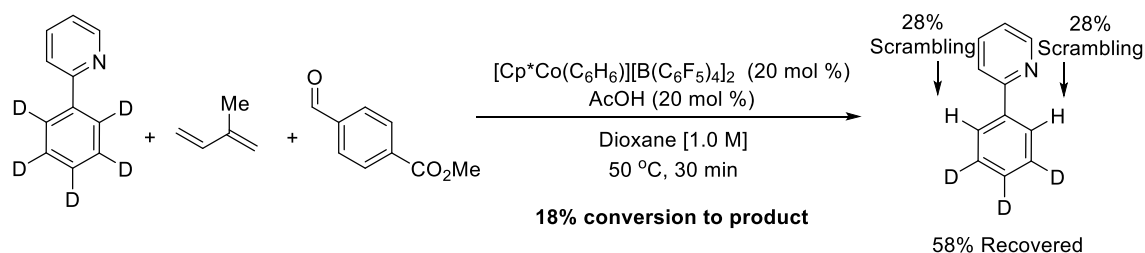

In order to investigate the reversibility of the C–H bond activation step, studies were conducted with 2-(phenyl-*d*<sub>5</sub>)pyridine, which was made according to the literature procedure<sup>[7]</sup> and the characterization data matched those reported in the literature.<sup>[19]</sup> In a N<sub>2</sub>-filled glove box, a 2.0–5.0 mL Biotage® microwave vial with a triangular stir bar (1 x 0.5 cm) was charged with 2-(phenyl-*d*<sub>5</sub>)pyridine (32.1 mg, 0.200 mmol, 1.00 equiv) and [Cp\*Co(C<sub>6</sub>H<sub>6</sub>)] [B(C<sub>6</sub>F<sub>5</sub>)<sub>4</sub>]<sub>2</sub> (65.2 mg, 0.0400 mmol, 0.200 equiv). Following this, 67 μL of a [0.6 M] stock solution of acetic acid in 1,4-dioxane followed by 133 μL of 1,4-dioxane were added. Methyl 4-formylbenzoate (32.1 mg, 0.600 mmol, 3.00 equiv) and isoprene (54.5 mg, 0.800 mmol, 4.00 equiv) were added successively. The reaction vial was then sealed and taken outside the glove box. The reaction mixture was stirred in a preheated oil bath at 50 °C for 30 min. The reaction vial was then cooled to room temperature and uncapped. The reaction was quenched with saturated NaHCO<sub>3</sub> (5 mL), and the resulting mixture was then extracted with ethyl acetate (5 x 3 mL). The organic layers were combined and dried over Na<sub>2</sub>SO<sub>4</sub>. The mixture was filtered through a celite plug using ethyl acetate as the eluent, and the resulting mixture was then concentrated. The NMR yield (18%) of the alcohol product was determined relative to 1,3,5-trimethoxybenzene as an external standard. The starting material C–H bond substrate was recovered by silica gel chromatography as a yellow oil (18.5 mg, 58% recovery). Approximately 28% H/D exchange at the ortho positions was observed by <sup>1</sup>H NMR, indicating reversible C–H activation. The site of H/D exchange was further confirmed by HMBC experiments of the recovered C–H bond substrate mixture. The spectra are shown below.

## SUPPORTING INFORMATION

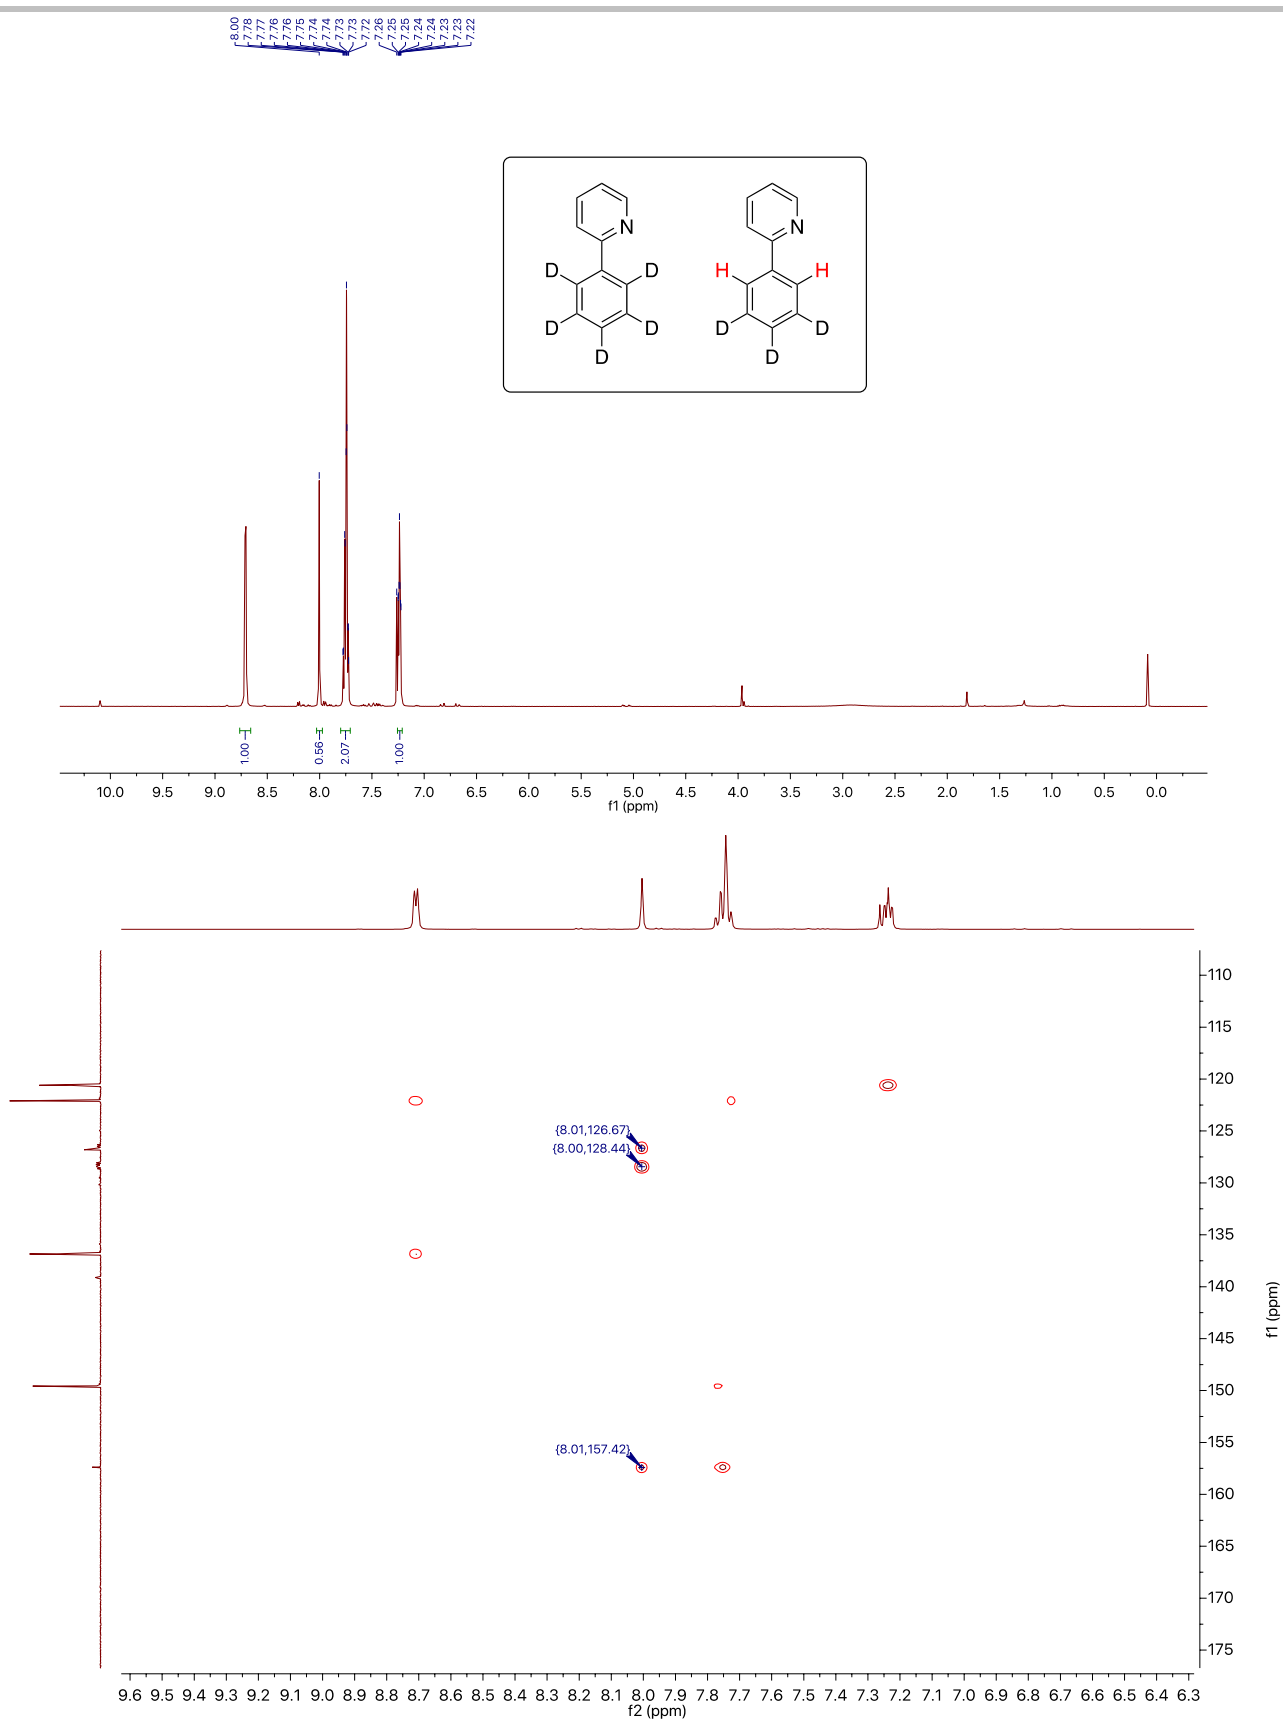



## SUPPORTING INFORMATION

## B. Investigation of 1,4-Deuterium Migration

**Preparation of PPh<sub>3</sub>CD<sub>3</sub>I:** PPh<sub>3</sub>CD<sub>3</sub>I was prepared by the following modified procedure based on the literature.<sup>[20]</sup> In a 250 three neck flask equipped with a reflux condenser under the N<sub>2</sub> atmosphere, Ph<sub>3</sub>P (8.47 g, 32.3 mmol, 1.00 equiv) and THF (60 mL) was added. To the mixture was added CD<sub>3</sub>I (2.4 mL, 38.6 mmol, 1.20 equiv) dropwise via a syringe over 5 min. The flask was placed in a preheated oil bath and was refluxed for 2 h. After 2 h, the reaction mixture was cooled to rt. The mixture was vacuum filtered and washed with diethyl ether. The white solid (12.5 g, 95%) was dried under vacuum overnight prior to use (100%-d<sub>3</sub>). The spectroscopic properties of this compound were consistent with the data available in the literature.<sup>[20]</sup>

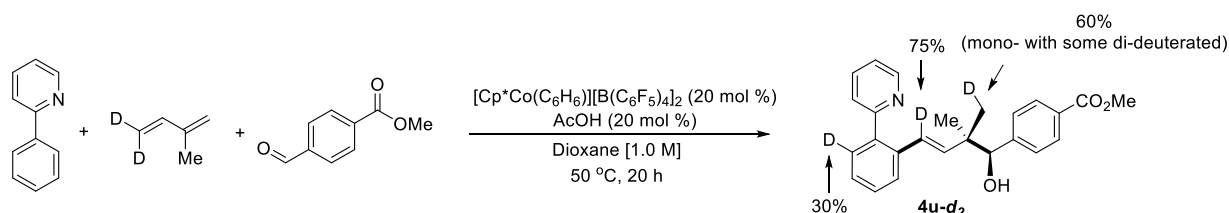

**Methyl 4-((1S,2R,E)-1-hydroxy-2-methyl-2-(methyl-d)-4-(2-(pyridin-2-yl)phenyl)but-3-en-1-yl-4-d)benzoate (4u-d<sub>2</sub>):** Isoprene-d<sub>2</sub> was prepared based on the literature procedure.<sup>[21]</sup> The general procedure A was followed using 2-phenylpyridine (31.0 mg, 0.200 mmol, 1.00 equiv), Isoprene-d<sub>2</sub> (56.2 mg, 0.800 mmol, 4.00 equiv) and methyl 4-formylbenzoate (98.5 mg, 0.600 mmol, 3.00 equiv). Purification by silica gel chromatography (40% ethyl acetate in hexane) provided the product **4u-d<sub>2</sub>** (55.4 mg, 71% yield) as a yellow oil. <sup>1</sup>H NMR (500 MHz, CDCl<sub>3</sub>): δ 8.67-8.66 (m, 1H), 7.95 (d, *J* = 8.3 Hz, 2H), 7.69-7.66 (m, 1H), 7.50-7.48 (m, 1.70H), 7.40-7.34 (m, 5H), 7.25-7.19 (m, 1H), 6.50 (d, *J* = 16.2 Hz, 0.25H), 6.00 (d, *J* = 16.2 Hz, 0.28H), 6.00 (m, 0.72H), 4.46 (s, 1H), 3.90 (s, 3H), 3.77 (bs, 1H), 1.03 (s, 3H), 0.94-0.92 (m, 2.40H).

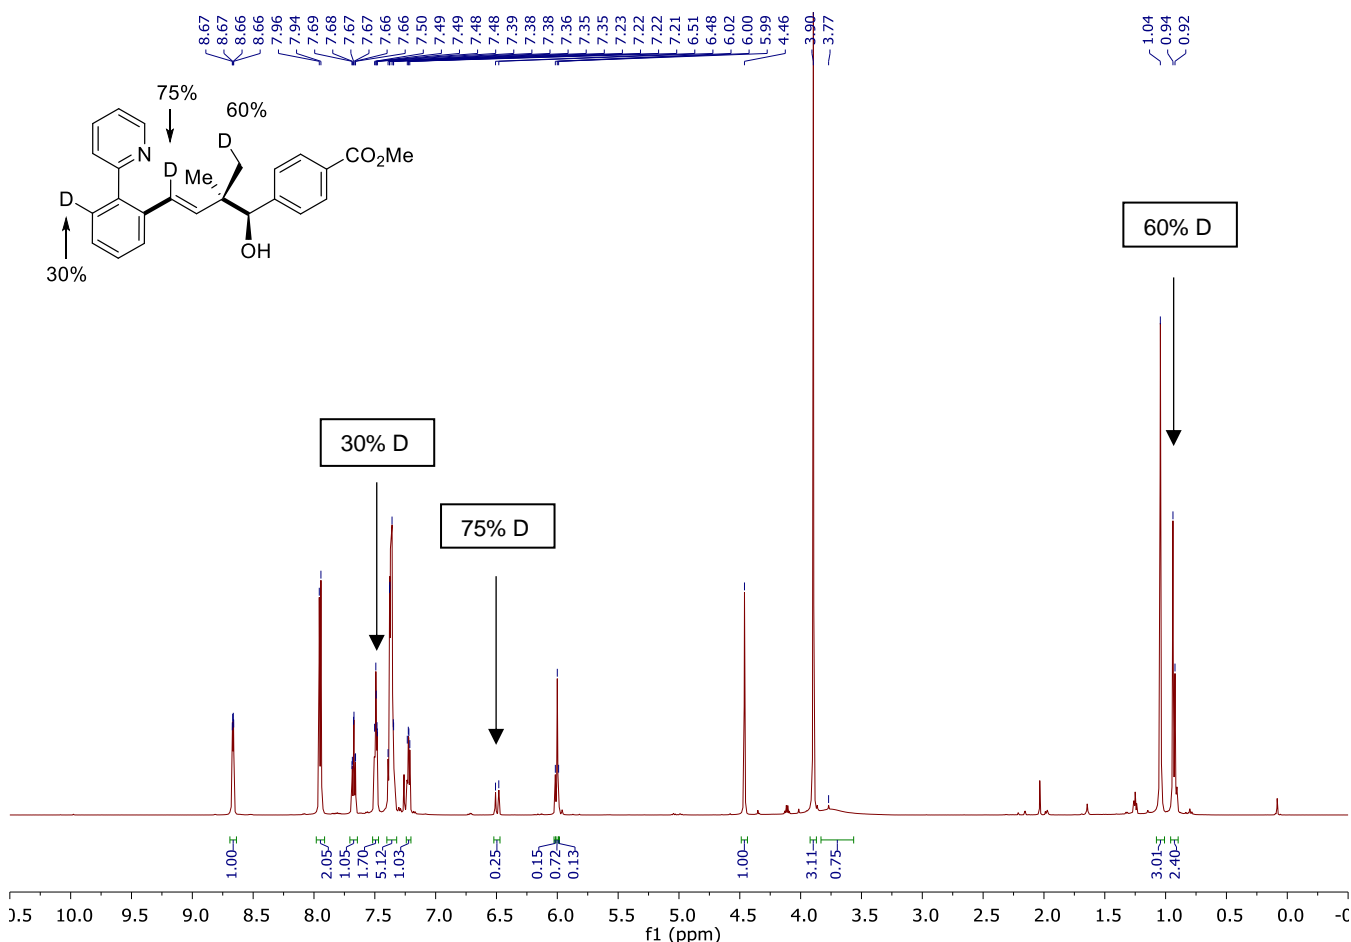

## SUPPORTING INFORMATION

## C. KIE experiments

## Parallel kinetic experiments at early conversion

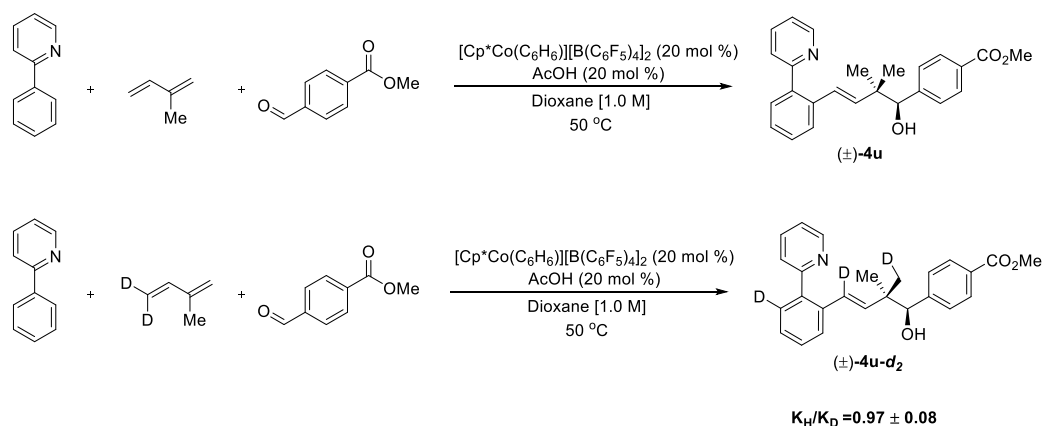

In a  $\text{N}_2$ -filled glove box, equipped with a stir bar was charged 2-phenylpyridine (31.0 mg, 0.200 mmol, 1.00 equiv) and  $[\text{Cp}^*\text{Co}(\text{C}_6\text{H}_6)][\text{B}(\text{C}_6\text{F}_5)_4]_2$  (65.2 mg, 0.0400 mmol, 0.200 equiv). Following this, 67  $\mu\text{L}$  of a [0.6 M] stock solution of acetic acid in 1,4-dioxane followed by 133  $\mu\text{L}$  of 1,4-dioxane were added. Methyl 4-formylbenzoate (0.600 mmol, 3.00 equiv) and trimethoxybenzene (11.2 mg, 0.200 mol, 1.00 equiv) was added. Next, either isoprene **2** (54.5 mg, 0.800 mmol, 4.00 equiv) or isoprene- $d_2$ , **2- $d_2$**  (56.2 mg, 0.800 mmol, 4.00 equiv) were added successively. The reaction vial was then sealed and taken outside the glove box. The reaction mixture was stirred in a preheated oil bath at 50 °C. At the designated time, an aliquot of approximately 0.02 mL was taken out and worked up with 1 mL of saturated  $\text{NaHCO}_3$  and 1 mL of diethyl ether. The combined organic layer was dried under  $\text{Na}_2\text{SO}_4$  and filtered through celite. At each time point, this was repeated, and the yield of **4u** and **4u- $d_2$**  was analyzed by crude NMR yield relative to the trimethoxybenzene peak.

## SUPPORTING INFORMATION

## C-1. Initial Rates for 4u

| Trial 1    |               | Trial 2    |               |
|------------|---------------|------------|---------------|
| Time (min) | NMR Yield (%) | Time (min) | NMR Yield (%) |
| 15         | 1.18          | 15         | 1.12          |
| 30         | 5.85          | 30         | 4.79          |
| 45         | 10.63         | 45         | 8.42          |
| 60         | 14.53         | 60         | 12.84         |
| 75         | 18.02         | 75         | 16.95         |

Trial 1. 4u yield (%) plotted against each time point (min).

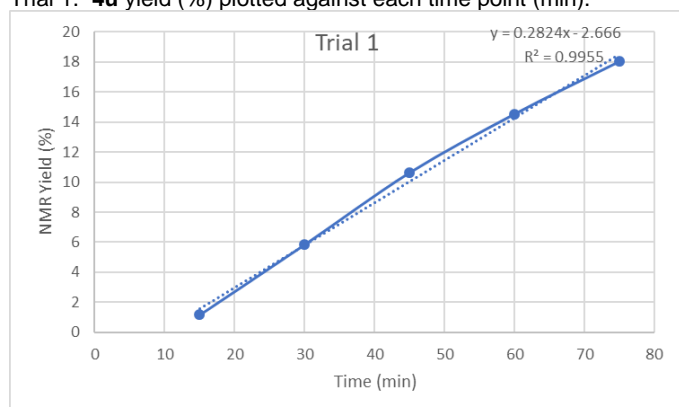

Trial 1.  $^1\text{H}$  NMR stacked at each time points (at 15, 30, 45, 60, 75 min), comparing trimethoxy benzene (6.1 ppm) and the product 4u singlet peak.

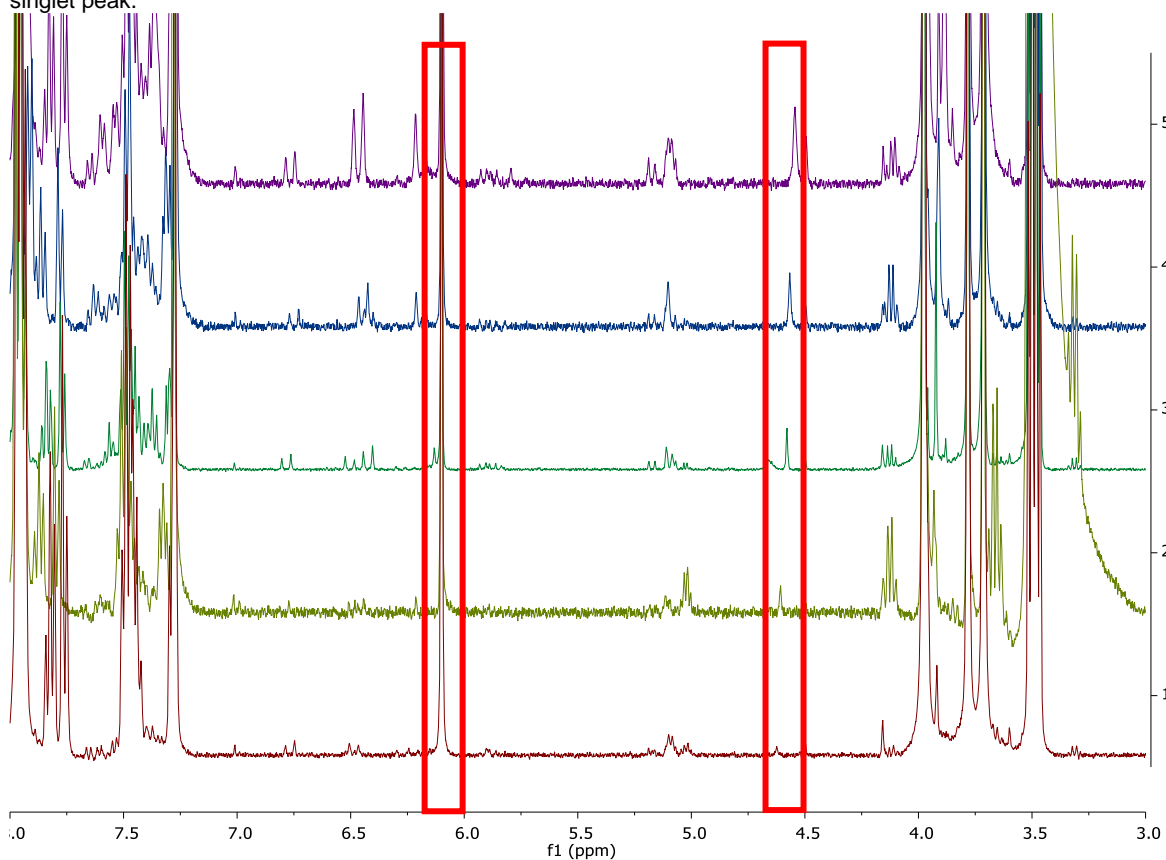

## SUPPORTING INFORMATION

Trial 2. **4u** yield (%) plotted against each time point (min).

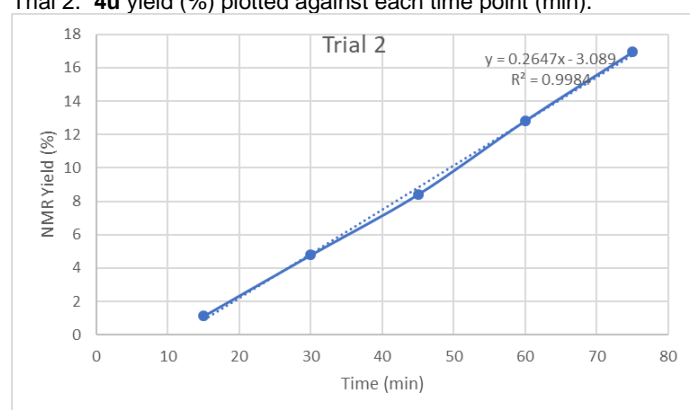

Trial 2.  $^1\text{H}$  NMR stacked at each time points (at 15, 30, 45, 60, 75 min), comparing trimethoxy benzene (6.1 ppm) and the product **4u** singlet peak.

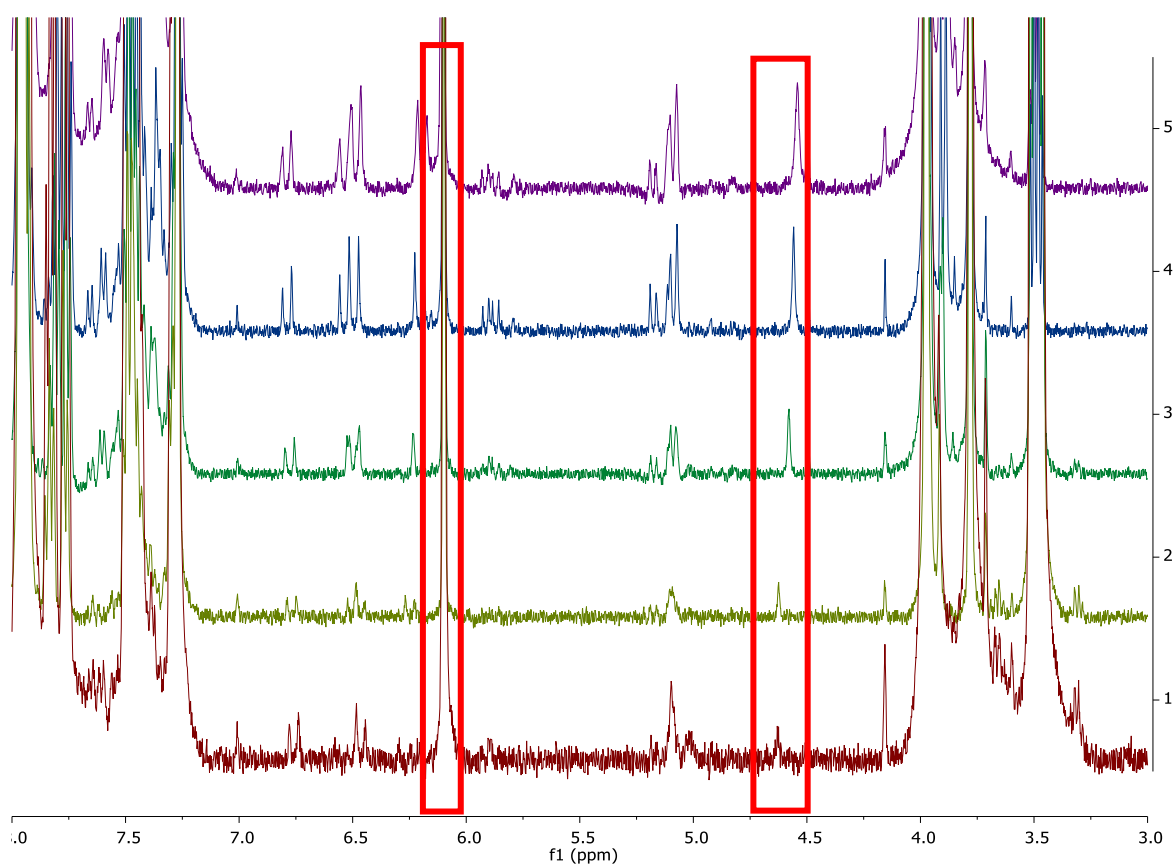

## SUPPORTING INFORMATION

C-2. Initial Rates for 4u-d<sub>2</sub>

| Trial 1    |               | Trial 2    |               |
|------------|---------------|------------|---------------|
| Time (min) | NMR Yield (%) | Time (min) | NMR Yield (%) |
| 15         | 1.43          | 15         | 1.67          |
| 30         | 5.14          | 30         | 6.27          |
| 45         | 8.13          | 45         | 11.17         |
| 60         | 12.65         | 60         | 15.45         |
| 75         | 17.72         | 75         | 19.27         |

Trial 1. 4u-d<sub>2</sub> yield (%) plotted against each time point (min).

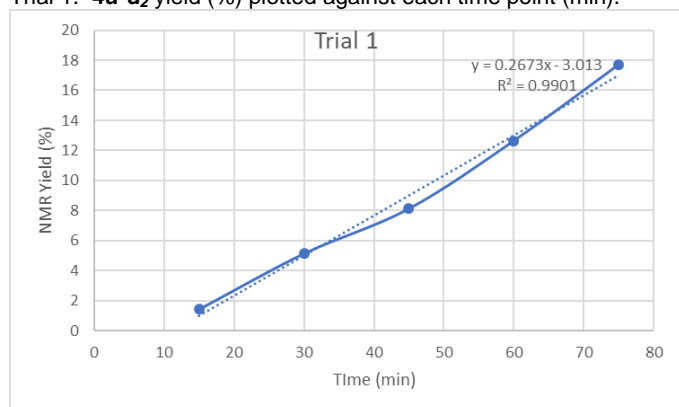

Trial 1. <sup>1</sup>H NMR stacked at each time points (at 15, 30, 45, 60, 75 min), comparing trimethoxy benzene (6.1 ppm) and the product 4u-d<sub>2</sub> singlet peak.

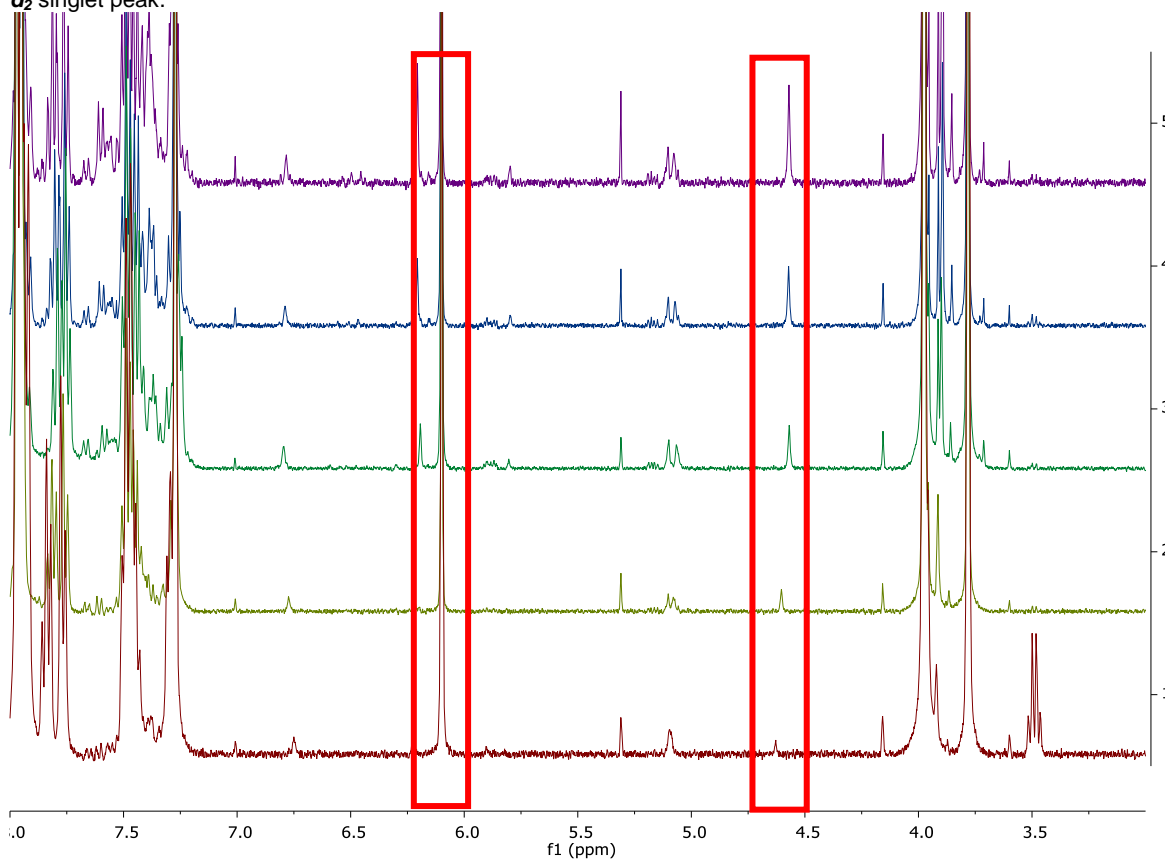

## SUPPORTING INFORMATION

Trial 2. **4u-d<sub>2</sub>** yield (%) plotted against each time point (min).

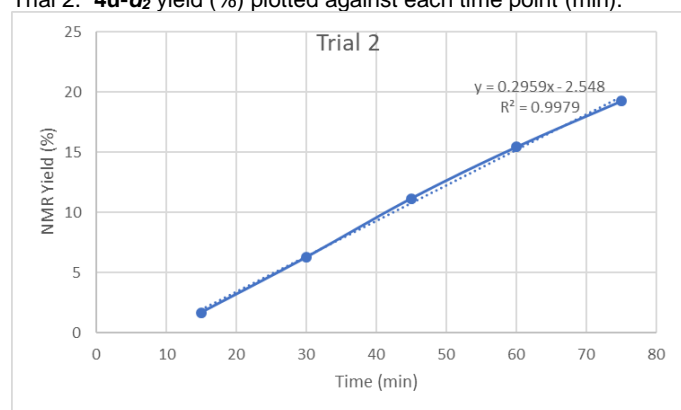

Trial 2. <sup>1</sup>H NMR stacked at each time points (at 15, 30, 45, 60, 75 min), comparing trimethoxy benzene (6.1 ppm) and the product **4u-d<sub>2</sub>** singlet peak.

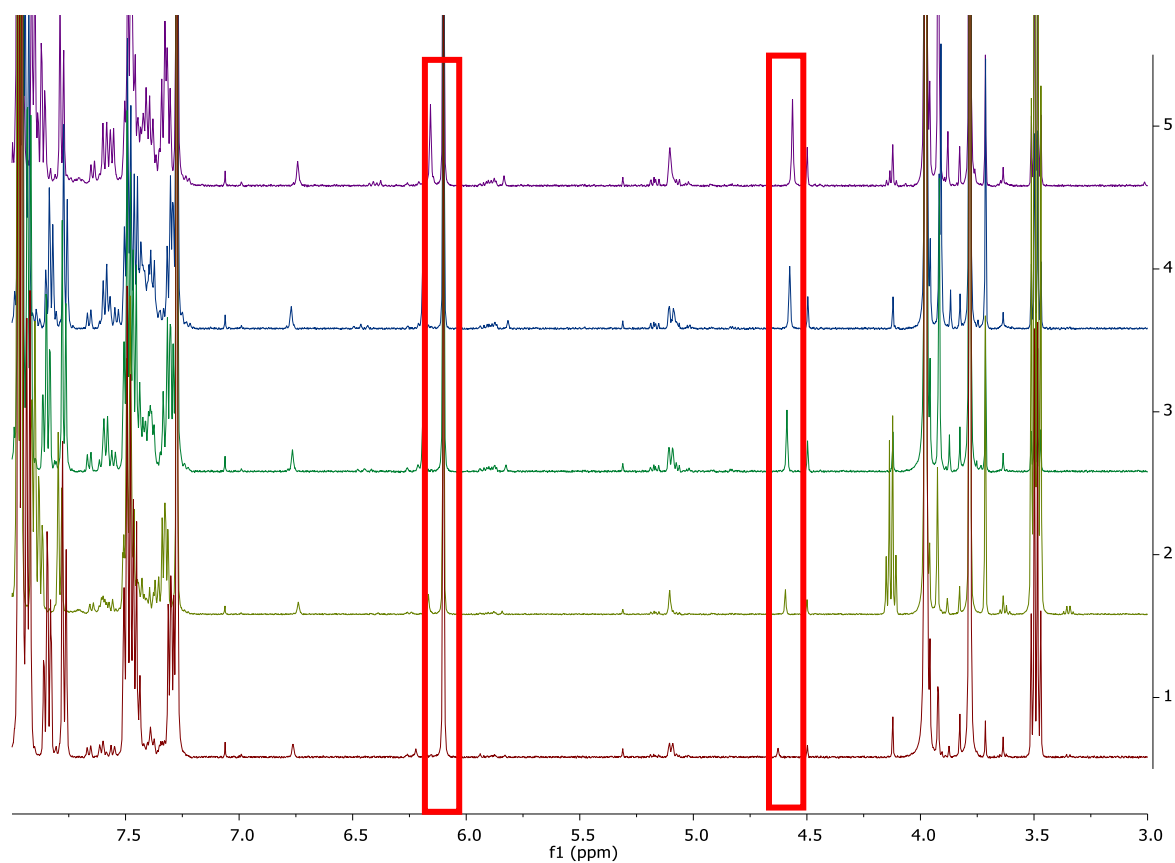

## SUPPORTING INFORMATION

**C-3.  $K_H/K_D$  Value**

| Initial Rates for $4u$       |                 |
|------------------------------|-----------------|
| Slope of 1 <sup>st</sup> Run | 0.2824          |
| Slope of 2 <sup>nd</sup> Run | 0.2647          |
| Average Slope                | 0.2736          |
| Std Deviation                | 0.0126          |
| Initial Rates for $4u-d_2$   |                 |
| Slope of 1 <sup>st</sup> Run | 0.2673          |
| Slope of 2 <sup>nd</sup> Run | 0.2959          |
| Average Slope                | 0.2816          |
| Std Deviation                | 0.0202          |
|                              |                 |
| $K_H/K_D$                    | $0.97 \pm 0.08$ |

## SUPPORTING INFORMATION

VI. 3,5-Dinitrobenzoylated Derivatives of **6a** and **8a**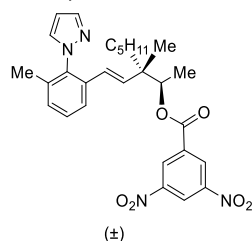

**(±)-(2R,3S)-3-Methyl-3-((E)-3-methyl-2-(1H-pyrazol-1-yl)styryl)octan-2-yl 3,5-dinitrobenzoate:** To an oven-dried microwave vial equipped with a stir bar was added 3,5-dinitrobenzoyl chloride (16.9 mg, 0.0735 mmol, 2.00 equiv). The vial was then capped with a microwave cap and equipped with a N<sub>2</sub>-inlet. Pyridine (0.3 mL) was then added, and the solution was cooled to 0 °C. Then **6a** (12.0 mg, 0.0368 mmol, 1.00 equiv) dissolved in pyridine (0.5 mL) was transferred to the reaction vial via a syringe (total pyridine: 0.8 mL). The vial was kept at 0 °C for 10 min and then allowed to warm to rt, and the reaction mixture was stirred at rt for 5 h. The reaction was quenched with water followed by addition of a saturated solution of CuSO<sub>4</sub>·5H<sub>2</sub>O (2 mL), and the resulting mixture was extracted with ethyl acetate (3 x 4 mL). The organic extract was dried over Na<sub>2</sub>SO<sub>4</sub> and concentrated under reduced pressure. The product was purified by silica gel

chromatography (30% ethyl acetate in hexane) to afford the 3,5-dinitrobenzoylated derivative of **6a** (16.8 mg, 88% yield) as a white solid (mp: 128-130 °C). IR (neat): 2935, 2870, 2359, 1726, 1546, 1347, 1275 cm<sup>-1</sup>. <sup>1</sup>H NMR (600 MHz, CDCl<sub>3</sub>) δ 9.20 (t, *J* = 2.1 Hz, 1H), 9.05 (d, *J* = 2.1 Hz, 2H), 7.68-7.67 (m, 1H), 7.40-7.37 (m, 2H), 7.31 (t, *J* = 7.7 Hz, 1H), 7.16 (d, *J* = 7.2 Hz, 1H), 6.41 (t, *J* = 2.1 Hz, 1H), 6.03 (d, *J* = 16.3 Hz, 1H), 5.70 (d, *J* = 16.3 Hz, 1H), 5.15 (q, *J* = 6.4 Hz, 1H), 1.99 (s, 3H), 1.40-1.35 (m, 2H), 1.28 (d, *J* = 6.5 Hz, 3H), 1.26-1.24 (m, 2H), 1.23-1.11 (m, 4H) 0.98 (s, 3H), 0.86 (t, *J* = 7.2 Hz, 3H). <sup>13</sup>C NMR (151 MHz, CDCl<sub>3</sub>) δ 162.1, 148.8, 140.3, 137.7, 137.5, 136.7, 136.0, 134.5, 131.5, 129.6, 129.44, 129.35, 125.2, 123.7, 122.4, 106.1, 79.3, 44.2, 37.8, 32.6, 23.8, 22.7, 18.2, 17.4, 15.2, 14.2. HRMS (ESI/[M+H]<sup>+</sup>) calcd. for C<sub>28</sub>H<sub>33</sub>N<sub>4</sub>O<sub>6</sub><sup>+</sup>, 521.2395. Found [M+H]<sup>+</sup>, 521.2408.

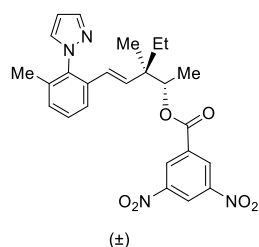

**(±)-(2R,3R,E)-3-Ethyl-3-methyl-5-(3-methyl-2-(1H-pyrazol-1-yl)phenyl)pent-4-en-2-yl 3,5-dinitrobenzoate :** To an oven-dried microwave vial equipped with a stir bar was added 3,5-dinitrobenzoyl chloride (81.1 mg, 0.352 mmol, 2.00 equiv). The vial was then capped with a microwave cap and equipped with a N<sub>2</sub>-inlet. Pyridine (0.8 mL) was then added, and the solution was cooled to 0 °C. Then **8a** (50.0 mg, 0.176 mmol, 1.00 equiv) dissolved in pyridine (1 mL) was transferred to the reaction vial via a syringe (total pyridine: 1.8 mL). The vial was kept at 0 °C for 10 min and then allowed to warm to rt, and the reaction mixture was stirred at rt for 5h. The reaction was quenched with water followed by addition of a saturated solution of CuSO<sub>4</sub>·5H<sub>2</sub>O (2 mL), and the resulting mixture was extracted with ethyl acetate (3 x 4 mL). The organic extract was dried over Na<sub>2</sub>SO<sub>4</sub> and concentrated under reduced

pressure. The product was isolated by silica gel chromatography (30% ethyl acetate in hexane) to afford the 3,5-dinitrobenzoylated derivative of **8a** (68.3 mg, 81%) as a white solid (mp: 124-126 °C). IR (neat): 3115, 2926, 1740, 1545, 1346, 1276 cm<sup>-1</sup>. <sup>1</sup>H NMR (600 MHz, CDCl<sub>3</sub>) δ 9.23-9.21 (m, 1H), 9.10-9.09 (m, 2H), 7.73-7.71 (m, 1H), 7.46-7.45 (m, 1H), 7.42 (d, *J* = 7.9 Hz, 1H), 7.34 (t, *J* = 7.8 Hz, 1H), 7.21 (d, *J* = 7.5 Hz, 1H), 6.45-6.43 (m, 1H), 5.93 (d, *J* = 16.4 Hz, 1H), 5.78 (d, *J* = 16.4 Hz, 1H), 5.15 (q, *J* = 6.4 Hz, 1H), 2.04 (s, 3H), 1.47-1.41 (m, 2H), 1.26 (d, *J* = 6.9 Hz, 3H), 1.01 (s, 3H), 0.77 (t, *J* = 7.5 Hz, 3H). <sup>13</sup>C NMR (151 MHz, CDCl<sub>3</sub>) δ 162.1, 148.8, 140.3, 137.8, 136.7, 136.6, 136.2, 134.5, 131.6, 129.7, 129.5, 129.4, 125.8, 123.9, 122.4, 106.2, 79.3, 44.0, 30.1, 17.9, 17.4, 15.5, 8.4. HRMS (ESI/[M+H]<sup>+</sup>) calcd. for C<sub>25</sub>H<sub>27</sub>N<sub>4</sub>O<sub>6</sub><sup>+</sup>, 479.1925. Found [M+H]<sup>+</sup>, 479.1935.



## SUPPORTING INFORMATION

VII. X-Ray Crystallographic Data for 3,5-dinitrobenzoylated derivatives of **6a** and **8a*****Experimental for 3,5-dinitrobenzoylated derivative of 6a***

Low-temperature diffraction data ( $\omega$ -scans) were collected on a Rigaku MicroMax-007HF diffractometer coupled to a Saturn994+ CCD detector with Cu K $\alpha$  ( $\lambda = 1.54178$  Å) for the structure of 3,5-dinitrobenzoylated derivative of **6a**. The diffraction images were processed and scaled using Rigaku Oxford Diffraction software (CrysAlisPro; Rigaku OD: The Woodlands, TX, 2015). The structure was solved with SHELXT and was refined against  $F^2$  on all data by full-matrix least squares with SHELXL (Sheldrick, G. M. Acta Cryst. 2008, A64, 112–122). All non-hydrogen atoms were refined anisotropically. Hydrogen atoms were included in the model at geometrically calculated positions and refined using a riding model. The isotropic displacement parameters of all hydrogen atoms were fixed to 1.2 times the U value of the atoms to which they are linked (1.5 times for methyl groups). The atoms C1 to C7 and O1 are disordered over two positions. The site occupancies are freely refined to converged values of 0.55/0.45. The major and minor orientations are distinguished by the suffixes "A" and "B". All chemically similar bond distances are restrained to be similar. No additional restraints or constraints were needed for a stable refinement. The full numbering scheme of compound 3,5-dinitrobenzoylated derivative of **6a** can be found in the full details of the X-ray structure determination (CIF), which is included as Supporting Information. CCDC number 1917393 (007b-19035) contains the supplementary crystallographic data for this paper. These data can be obtained free of charge from The Cambridge Crystallographic Data Center via [www.ccdc.cam.ac.uk/data\\_request/cif](http://www.ccdc.cam.ac.uk/data_request/cif).

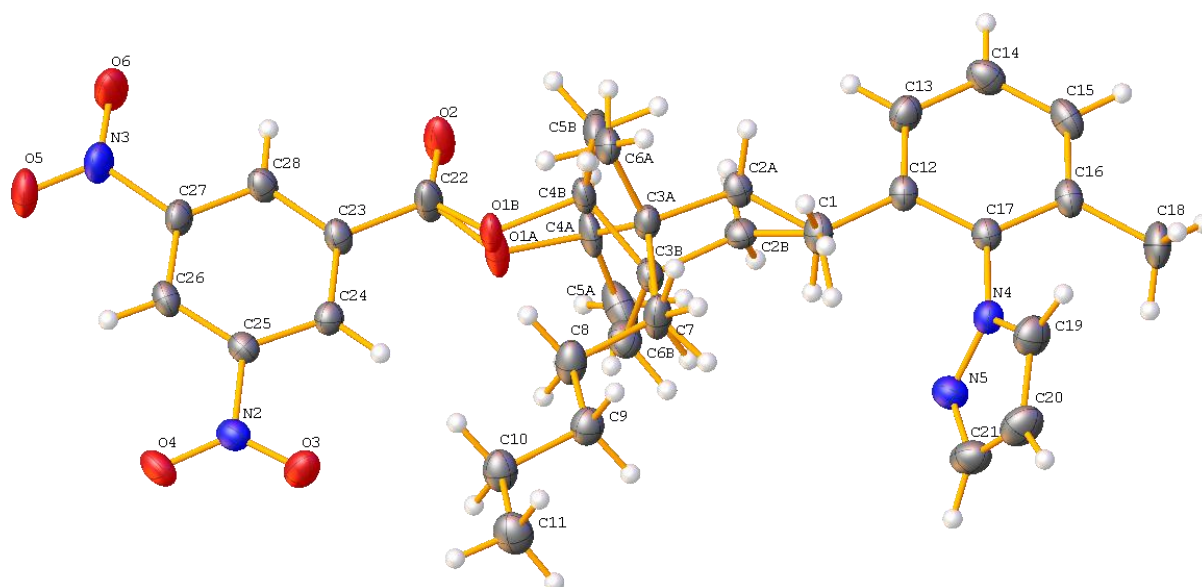

Figure S1. The complete numbering scheme of 3,5-dinitrobenzoylated derivative of **6a** with 50% thermal ellipsoid probability levels. The hydrogen atoms are shown as circles for clarity.

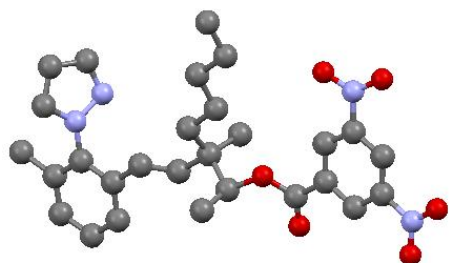

Figure S2. Another perspective of the crystal structure showing the indicated relative stereochemistry. The hydrogen atoms are omitted for clarity.

## SUPPORTING INFORMATION

Table S2. Crystal data and structure refinement for 3,5-dinitrobenzoylated derivative of **6a**.

|                                   |                                                               |                 |
|-----------------------------------|---------------------------------------------------------------|-----------------|
| Identification code               | 007b-19035                                                    |                 |
| Empirical formula                 | C <sub>28</sub> H <sub>34</sub> N <sub>4</sub> O <sub>6</sub> |                 |
| Formula weight                    | 522.59                                                        |                 |
| Temperature                       | 93(2) K                                                       |                 |
| Wavelength                        | 1.54184 Å                                                     |                 |
| Crystal system                    | Monoclinic                                                    |                 |
| Space group                       | P2 <sub>1</sub> /c                                            |                 |
| Unit cell dimensions              | a = 7.7273(2) Å                                               | α = 90°.        |
|                                   | b = 31.6878(6) Å                                              | β = 99.883(2)°. |
|                                   | c = 10.8702(2) Å                                              | γ = 90°.        |
| Volume                            | 2622.19(10) Å <sup>3</sup>                                    |                 |
| Z                                 | 4                                                             |                 |
| Density (calculated)              | 1.324 Mg/m <sup>3</sup>                                       |                 |
| Absorption coefficient            | 0.771 mm <sup>-1</sup>                                        |                 |
| F(000)                            | 1112                                                          |                 |
| Crystal size                      | 0.200 x 0.200 x 0.200 mm <sup>3</sup>                         |                 |
| Crystal color and habit           | Colorless Block                                               |                 |
| Diffractometer                    | Rigaku Saturn 944+ CCD                                        |                 |
| Theta range for data collection   | 2.789 to 66.594°.                                             |                 |
| Index ranges                      | -9 ≤ h ≤ 9, -37 ≤ k ≤ 37, -12 ≤ l ≤ 12                        |                 |
| Reflections collected             | 89834                                                         |                 |
| Independent reflections           | 4612 [R(int) = 0.0547]                                        |                 |
| Observed reflections (I > 2σ(I))  | 4214                                                          |                 |
| Completeness to theta = 66.594°   | 99.7 %                                                        |                 |
| Absorption correction             | Semi-empirical from equivalents                               |                 |
| Max. and min. transmission        | 1.00000 and 0.73443                                           |                 |
| Solution method                   | SHELXT-2014/5 (Sheldrick, 2014)                               |                 |
| Refinement method                 | SHELXL-2014/7 (Sheldrick, 2014)                               |                 |
| Data / restraints / parameters    | 4612 / 10 / 405                                               |                 |
| Goodness-of-fit on F <sup>2</sup> | 1.063                                                         |                 |
| Final R indices [I > 2σ(I)]       | R1 = 0.0478, wR2 = 0.1276                                     |                 |
| R indices (all data)              | R1 = 0.0515, wR2 = 0.1306                                     |                 |
| Extinction coefficient            | 0.0061(4)                                                     |                 |
| Largest diff. peak and hole       | 0.534 and -0.507 e.Å <sup>-3</sup>                            |                 |

## SUPPORTING INFORMATION

Table S3. Atomic coordinates ( $\times 10^4$ ) and equivalent isotropic displacement parameters ( $\text{\AA}^2 \times 10^3$ ) for 3,5-dinitrobenzoylated derivative of **6a**.  $U(\text{eq})$  is defined as one third of the trace of the orthogonalized  $U^{ij}$  tensor.

|       | x        | y       | z        | $U(\text{eq})$ |
|-------|----------|---------|----------|----------------|
| O(1B) | 7956(9)  | 6620(3) | 5406(7)  | 29(2)          |
| O(1A) | 7353(8)  | 6639(2) | 5431(6)  | 37(2)          |
| O(2)  | 8115(2)  | 7323(1) | 5791(1)  | 45(1)          |
| O(3)  | 8027(2)  | 5643(1) | 8791(1)  | 40(1)          |
| O(4)  | 8851(2)  | 5850(1) | 10702(1) | 35(1)          |
| O(5)  | 11901(2) | 7184(1) | 11413(1) | 42(1)          |
| O(6)  | 11766(2) | 7630(1) | 9889(1)  | 53(1)          |
| N(2)  | 8603(2)  | 5909(1) | 9575(1)  | 28(1)          |
| N(3)  | 11415(2) | 7291(1) | 10328(1) | 35(1)          |
| N(4)  | 3502(2)  | 5816(1) | -836(1)  | 26(1)          |
| N(5)  | 2422(2)  | 5740(1) | 7(1)     | 32(1)          |
| C(1)  | 5442(2)  | 6332(1) | 1087(2)  | 30(1)          |
| C(2B) | 5494(7)  | 6547(1) | 2144(3)  | 25(1)          |
| C(2A) | 6510(6)  | 6559(1) | 1969(3)  | 24(1)          |
| C(3B) | 6033(5)  | 6401(1) | 3493(3)  | 25(1)          |
| C(3A) | 7273(4)  | 6410(1) | 3282(3)  | 25(1)          |
| C(4B) | 7583(7)  | 6684(1) | 4033(3)  | 25(1)          |
| C(4A) | 6487(6)  | 6716(1) | 4141(3)  | 32(1)          |
| C(5B) | 9247(16) | 6610(3) | 3543(13) | 37(2)          |
| C(5A) | 4558(9)  | 6689(2) | 4105(6)  | 45(1)          |
| C(6B) | 4445(9)  | 6499(2) | 4153(7)  | 31(1)          |
| C(6A) | 9279(12) | 6471(2) | 3444(10) | 31(2)          |
| C(7)  | 6680(3)  | 5933(1) | 3494(2)  | 35(1)          |
| C(8)  | 7248(3)  | 5742(1) | 4799(2)  | 35(1)          |
| C(9)  | 7326(2)  | 5261(1) | 4789(2)  | 31(1)          |
| C(10) | 7893(3)  | 5079(1) | 6095(2)  | 34(1)          |
| C(11) | 8024(3)  | 4601(1) | 6121(2)  | 39(1)          |
| C(12) | 4845(2)  | 6498(1) | -179(2)  | 24(1)          |
| C(13) | 5176(2)  | 6914(1) | -495(2)  | 30(1)          |
| C(14) | 4606(2)  | 7066(1) | -1686(2) | 33(1)          |
| C(15) | 3689(2)  | 6807(1) | -2593(2) | 32(1)          |
| C(16) | 3324(2)  | 6391(1) | -2330(2) | 27(1)          |
| C(17) | 3914(2)  | 6241(1) | -1120(2) | 24(1)          |

SUPPORTING INFORMATION

---

|       |          |         |          |       |
|-------|----------|---------|----------|-------|
| C(18) | 2254(3)  | 6118(1) | -3318(2) | 37(1) |
| C(19) | 3910(2)  | 5455(1) | -1390(2) | 35(1) |
| C(20) | 3083(3)  | 5132(1) | -898(2)  | 41(1) |
| C(21) | 2192(2)  | 5325(1) | -40(2)   | 37(1) |
| C(22) | 8132(3)  | 6962(1) | 6138(2)  | 34(1) |
| C(23) | 8763(2)  | 6829(1) | 7459(2)  | 25(1) |
| C(24) | 8403(2)  | 6429(1) | 7887(2)  | 24(1) |
| C(25) | 9010(2)  | 6329(1) | 9116(2)  | 24(1) |
| C(26) | 9998(2)  | 6602(1) | 9948(2)  | 26(1) |
| C(27) | 10340(2) | 6993(1) | 9482(2)  | 26(1) |
| C(28) | 9746(2)  | 7116(1) | 8262(2)  | 26(1) |

---

## SUPPORTING INFORMATION

Table S4. Bond lengths [Å] and angles [°] for 3,5-dinitrobenzoylated derivative of **6a**.

---

|              |            |
|--------------|------------|
| O(1B)-C(22)  | 1.339(8)   |
| O(1B)-C(4B)  | 1.485(8)   |
| O(1A)-C(22)  | 1.359(7)   |
| O(1A)-C(4A)  | 1.467(7)   |
| O(2)-C(22)   | 1.203(2)   |
| O(3)-N(2)    | 1.2267(19) |
| O(4)-N(2)    | 1.2210(18) |
| O(5)-N(3)    | 1.2232(19) |
| O(6)-N(3)    | 1.224(2)   |
| N(2)-C(25)   | 1.473(2)   |
| N(3)-C(27)   | 1.471(2)   |
| N(4)-C(19)   | 1.355(2)   |
| N(4)-N(5)    | 1.362(2)   |
| N(4)-C(17)   | 1.429(2)   |
| N(5)-C(21)   | 1.328(2)   |
| C(1)-C(2B)   | 1.332(4)   |
| C(1)-C(2A)   | 1.359(4)   |
| C(1)-C(12)   | 1.472(2)   |
| C(1)-H(1AA)  | 0.9900     |
| C(1)-H(1AB)  | 0.9900     |
| C(1)-H(1BC)  | 0.9900     |
| C(1)-H(1BD)  | 0.9900     |
| C(2B)-C(3B)  | 1.525(5)   |
| C(2B)-H(2BA) | 0.9900     |
| C(2B)-H(2BB) | 0.9900     |
| C(2A)-C(3A)  | 1.522(4)   |
| C(2A)-H(2AA) | 0.9900     |
| C(2A)-H(2AB) | 0.9900     |
| C(3B)-C(4B)  | 1.530(6)   |
| C(3B)-C(6B)  | 1.555(8)   |
| C(3B)-C(7)   | 1.567(4)   |
| C(3A)-C(4A)  | 1.541(5)   |
| C(3A)-C(6A)  | 1.542(10)  |
| C(3A)-C(7)   | 1.609(3)   |
| C(4B)-C(5B)  | 1.492(12)  |
| C(4B)-H(4B)  | 1.0000     |

SUPPORTING INFORMATION

---

|              |          |
|--------------|----------|
| C(4A)-C(5A)  | 1.487(8) |
| C(4A)-H(4A)  | 1.0000   |
| C(5B)-H(5BA) | 0.9800   |
| C(5B)-H(5BB) | 0.9800   |
| C(5B)-H(5BC) | 0.9800   |
| C(5A)-H(5AA) | 0.9800   |
| C(5A)-H(5AB) | 0.9800   |
| C(5A)-H(5AC) | 0.9800   |
| C(6B)-H(6BA) | 0.9800   |
| C(6B)-H(6BB) | 0.9800   |
| C(6B)-H(6BC) | 0.9800   |
| C(6A)-H(6AA) | 0.9800   |
| C(6A)-H(6AB) | 0.9800   |
| C(6A)-H(6AC) | 0.9800   |
| C(7)-C(8)    | 1.535(2) |
| C(7)-H(7BC)  | 0.9900   |
| C(7)-H(7BD)  | 0.9900   |
| C(7)-H(7AA)  | 0.9900   |
| C(7)-H(7AB)  | 0.9900   |
| C(8)-C(9)    | 1.526(2) |
| C(8)-H(8A)   | 0.9900   |
| C(8)-H(8B)   | 0.9900   |
| C(9)-C(10)   | 1.524(2) |
| C(9)-H(9A)   | 0.9900   |
| C(9)-H(9B)   | 0.9900   |
| C(10)-C(11)  | 1.518(2) |
| C(10)-H(10A) | 0.9900   |
| C(10)-H(10B) | 0.9900   |
| C(11)-H(11A) | 0.9800   |
| C(11)-H(11B) | 0.9800   |
| C(11)-H(11C) | 0.9800   |
| C(12)-C(13)  | 1.396(2) |
| C(12)-C(17)  | 1.405(2) |
| C(13)-C(14)  | 1.380(3) |
| C(13)-H(13)  | 0.9500   |
| C(14)-C(15)  | 1.381(3) |
| C(14)-H(14)  | 0.9500   |
| C(15)-C(16)  | 1.388(2) |

SUPPORTING INFORMATION

---

|                   |            |
|-------------------|------------|
| C(15)-H(15)       | 0.9500     |
| C(16)-C(17)       | 1.399(2)   |
| C(16)-C(18)       | 1.510(2)   |
| C(18)-H(18A)      | 0.9800     |
| C(18)-H(18B)      | 0.9800     |
| C(18)-H(18C)      | 0.9800     |
| C(19)-C(20)       | 1.364(3)   |
| C(19)-H(19)       | 0.9500     |
| C(20)-C(21)       | 1.391(3)   |
| C(20)-H(20)       | 0.9500     |
| C(21)-H(21)       | 0.9500     |
| C(22)-C(23)       | 1.496(2)   |
| C(23)-C(28)       | 1.392(2)   |
| C(23)-C(24)       | 1.393(2)   |
| C(24)-C(25)       | 1.375(2)   |
| C(24)-H(24)       | 0.9500     |
| C(25)-C(26)       | 1.382(2)   |
| C(26)-C(27)       | 1.382(2)   |
| C(26)-H(26)       | 0.9500     |
| C(27)-C(28)       | 1.382(2)   |
| C(28)-H(28)       | 0.9500     |
| <br>              |            |
| C(22)-O(1B)-C(4B) | 117.9(7)   |
| C(22)-O(1A)-C(4A) | 120.0(6)   |
| O(4)-N(2)-O(3)    | 124.54(14) |
| O(4)-N(2)-C(25)   | 118.14(14) |
| O(3)-N(2)-C(25)   | 117.31(13) |
| O(5)-N(3)-O(6)    | 124.51(15) |
| O(5)-N(3)-C(27)   | 118.22(14) |
| O(6)-N(3)-C(27)   | 117.26(14) |
| C(19)-N(4)-N(5)   | 111.42(14) |
| C(19)-N(4)-C(17)  | 128.43(14) |
| N(5)-N(4)-C(17)   | 119.84(13) |
| C(21)-N(5)-N(4)   | 104.12(15) |
| C(2B)-C(1)-C(12)  | 125.5(2)   |
| C(2A)-C(1)-C(12)  | 121.61(19) |
| C(2B)-C(1)-H(1AA) | 106.0      |
| C(12)-C(1)-H(1AA) | 106.0      |

SUPPORTING INFORMATION

---

|                     |          |
|---------------------|----------|
| C(2B)-C(1)-H(1AB)   | 106.0    |
| C(12)-C(1)-H(1AB)   | 106.0    |
| H(1AA)-C(1)-H(1AB)  | 106.3    |
| C(2A)-C(1)-H(1BC)   | 106.9    |
| C(12)-C(1)-H(1BC)   | 106.9    |
| C(2A)-C(1)-H(1BD)   | 106.9    |
| C(12)-C(1)-H(1BD)   | 106.9    |
| H(1BC)-C(1)-H(1BD)  | 106.7    |
| C(1)-C(2B)-C(3B)    | 129.6(3) |
| C(1)-C(2B)-H(2BA)   | 104.9    |
| C(3B)-C(2B)-H(2BA)  | 104.9    |
| C(1)-C(2B)-H(2BB)   | 104.9    |
| C(3B)-C(2B)-H(2BB)  | 104.9    |
| H(2BA)-C(2B)-H(2BB) | 105.8    |
| C(1)-C(2A)-C(3A)    | 126.0(3) |
| C(1)-C(2A)-H(2AA)   | 105.8    |
| C(3A)-C(2A)-H(2AA)  | 105.8    |
| C(1)-C(2A)-H(2AB)   | 105.8    |
| C(3A)-C(2A)-H(2AB)  | 105.8    |
| H(2AA)-C(2A)-H(2AB) | 106.2    |
| C(2B)-C(3B)-C(4B)   | 104.9(3) |
| C(2B)-C(3B)-C(6B)   | 106.1(4) |
| C(4B)-C(3B)-C(6B)   | 109.5(4) |
| C(2B)-C(3B)-C(7)    | 108.8(3) |
| C(4B)-C(3B)-C(7)    | 109.0(3) |
| C(6B)-C(3B)-C(7)    | 117.8(3) |
| C(2A)-C(3A)-C(4A)   | 104.1(2) |
| C(2A)-C(3A)-C(6A)   | 106.7(5) |
| C(4A)-C(3A)-C(6A)   | 110.2(4) |
| C(2A)-C(3A)-C(7)    | 110.5(2) |
| C(4A)-C(3A)-C(7)    | 110.7(3) |
| C(6A)-C(3A)-C(7)    | 114.0(3) |
| O(1B)-C(4B)-C(5B)   | 107.9(7) |
| O(1B)-C(4B)-C(3B)   | 108.0(4) |
| C(5B)-C(4B)-C(3B)   | 116.0(5) |
| O(1B)-C(4B)-H(4B)   | 108.3    |
| C(5B)-C(4B)-H(4B)   | 108.3    |
| C(3B)-C(4B)-H(4B)   | 108.3    |



SUPPORTING INFORMATION

---

|                     |            |
|---------------------|------------|
| O(1A)-C(4A)-C(5A)   | 107.9(4)   |
| O(1A)-C(4A)-C(3A)   | 108.2(4)   |
| C(5A)-C(4A)-C(3A)   | 116.5(4)   |
| O(1A)-C(4A)-H(4A)   | 108.0      |
| C(5A)-C(4A)-H(4A)   | 108.0      |
| C(3A)-C(4A)-H(4A)   | 108.0      |
| C(4B)-C(5B)-H(5BA)  | 109.5      |
| C(4B)-C(5B)-H(5BB)  | 109.5      |
| H(5BA)-C(5B)-H(5BB) | 109.5      |
| C(4B)-C(5B)-H(5BC)  | 109.5      |
| H(5BA)-C(5B)-H(5BC) | 109.5      |
| H(5BB)-C(5B)-H(5BC) | 109.5      |
| C(4A)-C(5A)-H(5AA)  | 109.5      |
| C(4A)-C(5A)-H(5AB)  | 109.5      |
| H(5AA)-C(5A)-H(5AB) | 109.5      |
| C(4A)-C(5A)-H(5AC)  | 109.5      |
| H(5AA)-C(5A)-H(5AC) | 109.5      |
| H(5AB)-C(5A)-H(5AC) | 109.5      |
| C(3B)-C(6B)-H(6BA)  | 109.5      |
| C(3B)-C(6B)-H(6BB)  | 109.5      |
| H(6BA)-C(6B)-H(6BB) | 109.5      |
| C(3B)-C(6B)-H(6BC)  | 109.5      |
| H(6BA)-C(6B)-H(6BC) | 109.5      |
| H(6BB)-C(6B)-H(6BC) | 109.5      |
| C(3A)-C(6A)-H(6AA)  | 109.5      |
| C(3A)-C(6A)-H(6AB)  | 109.5      |
| H(6AA)-C(6A)-H(6AB) | 109.5      |
| C(3A)-C(6A)-H(6AC)  | 109.5      |
| H(6AA)-C(6A)-H(6AC) | 109.5      |
| H(6AB)-C(6A)-H(6AC) | 109.5      |
| C(8)-C(7)-C(3B)     | 114.48(18) |
| C(8)-C(7)-C(3A)     | 117.32(16) |
| C(8)-C(7)-H(7BC)    | 108.0      |
| C(3A)-C(7)-H(7BC)   | 108.0      |
| C(8)-C(7)-H(7BD)    | 108.0      |
| C(3A)-C(7)-H(7BD)   | 108.0      |
| H(7BC)-C(7)-H(7BD)  | 107.2      |
| C(8)-C(7)-H(7AA)    | 108.6      |

SUPPORTING INFORMATION

---

|                     |            |
|---------------------|------------|
| C(3B)-C(7)-H(7AA)   | 108.6      |
| C(8)-C(7)-H(7AB)    | 108.6      |
| C(3B)-C(7)-H(7AB)   | 108.6      |
| H(7AA)-C(7)-H(7AB)  | 107.6      |
| C(9)-C(8)-C(7)      | 113.13(14) |
| C(9)-C(8)-H(8A)     | 109.0      |
| C(7)-C(8)-H(8A)     | 109.0      |
| C(9)-C(8)-H(8B)     | 109.0      |
| C(7)-C(8)-H(8B)     | 109.0      |
| H(8A)-C(8)-H(8B)    | 107.8      |
| C(10)-C(9)-C(8)     | 112.16(14) |
| C(10)-C(9)-H(9A)    | 109.2      |
| C(8)-C(9)-H(9A)     | 109.2      |
| C(10)-C(9)-H(9B)    | 109.2      |
| C(8)-C(9)-H(9B)     | 109.2      |
| H(9A)-C(9)-H(9B)    | 107.9      |
| C(11)-C(10)-C(9)    | 113.72(15) |
| C(11)-C(10)-H(10A)  | 108.8      |
| C(9)-C(10)-H(10A)   | 108.8      |
| C(11)-C(10)-H(10B)  | 108.8      |
| C(9)-C(10)-H(10B)   | 108.8      |
| H(10A)-C(10)-H(10B) | 107.7      |
| C(10)-C(11)-H(11A)  | 109.5      |
| C(10)-C(11)-H(11B)  | 109.5      |
| H(11A)-C(11)-H(11B) | 109.5      |
| C(10)-C(11)-H(11C)  | 109.5      |
| H(11A)-C(11)-H(11C) | 109.5      |
| H(11B)-C(11)-H(11C) | 109.5      |
| C(13)-C(12)-C(17)   | 117.44(15) |
| C(13)-C(12)-C(1)    | 121.83(15) |
| C(17)-C(12)-C(1)    | 120.73(14) |
| C(14)-C(13)-C(12)   | 121.11(16) |
| C(14)-C(13)-H(13)   | 119.4      |
| C(12)-C(13)-H(13)   | 119.4      |
| C(13)-C(14)-C(15)   | 120.36(16) |
| C(13)-C(14)-H(14)   | 119.8      |
| C(15)-C(14)-H(14)   | 119.8      |
| C(14)-C(15)-C(16)   | 120.90(16) |

SUPPORTING INFORMATION

---

|                     |            |
|---------------------|------------|
| C(14)-C(15)-H(15)   | 119.5      |
| C(16)-C(15)-H(15)   | 119.5      |
| C(15)-C(16)-C(17)   | 118.12(15) |
| C(15)-C(16)-C(18)   | 120.20(15) |
| C(17)-C(16)-C(18)   | 121.63(15) |
| C(16)-C(17)-C(12)   | 122.06(15) |
| C(16)-C(17)-N(4)    | 118.28(14) |
| C(12)-C(17)-N(4)    | 119.62(14) |
| C(16)-C(18)-H(18A)  | 109.5      |
| C(16)-C(18)-H(18B)  | 109.5      |
| H(18A)-C(18)-H(18B) | 109.5      |
| C(16)-C(18)-H(18C)  | 109.5      |
| H(18A)-C(18)-H(18C) | 109.5      |
| H(18B)-C(18)-H(18C) | 109.5      |
| N(4)-C(19)-C(20)    | 107.39(17) |
| N(4)-C(19)-H(19)    | 126.3      |
| C(20)-C(19)-H(19)   | 126.3      |
| C(19)-C(20)-C(21)   | 104.66(16) |
| C(19)-C(20)-H(20)   | 127.7      |
| C(21)-C(20)-H(20)   | 127.7      |
| N(5)-C(21)-C(20)    | 112.42(17) |
| N(5)-C(21)-H(21)    | 123.8      |
| C(20)-C(21)-H(21)   | 123.8      |
| O(2)-C(22)-O(1B)    | 126.1(4)   |
| O(2)-C(22)-O(1A)    | 124.0(3)   |
| O(2)-C(22)-C(23)    | 123.68(15) |
| O(1B)-C(22)-C(23)   | 108.9(4)   |
| O(1A)-C(22)-C(23)   | 111.6(3)   |
| C(28)-C(23)-C(24)   | 120.15(15) |
| C(28)-C(23)-C(22)   | 118.00(15) |
| C(24)-C(23)-C(22)   | 121.85(15) |
| C(25)-C(24)-C(23)   | 118.74(15) |
| C(25)-C(24)-H(24)   | 120.6      |
| C(23)-C(24)-H(24)   | 120.6      |
| C(24)-C(25)-C(26)   | 123.22(15) |
| C(24)-C(25)-N(2)    | 118.72(14) |
| C(26)-C(25)-N(2)    | 118.06(14) |
| C(27)-C(26)-C(25)   | 116.18(15) |

SUPPORTING INFORMATION

---

|                   |            |
|-------------------|------------|
| C(27)-C(26)-H(26) | 121.9      |
| C(25)-C(26)-H(26) | 121.9      |
| C(26)-C(27)-C(28) | 123.41(15) |
| C(26)-C(27)-N(3)  | 117.99(15) |
| C(28)-C(27)-N(3)  | 118.60(15) |
| C(27)-C(28)-C(23) | 118.28(15) |
| C(27)-C(28)-H(28) | 120.9      |
| C(23)-C(28)-H(28) | 120.9      |

---

Symmetry transformations used to generate equivalent atoms:

## SUPPORTING INFORMATION

Table S5. Anisotropic displacement parameters ( $\text{\AA}^2 \times 10^3$ ) for 3,5-dinitrobenzoylated derivative of **6a**. The anisotropic displacement factor exponent takes the form:  $-2\pi^2 [ h^2 a^{*2} U^{11} + \dots + 2 h k a^* b^* U^{12} ]$

|       | U <sup>11</sup> | U <sup>22</sup> | U <sup>33</sup> | U <sup>23</sup> | U <sup>13</sup> | U <sup>12</sup> |
|-------|-----------------|-----------------|-----------------|-----------------|-----------------|-----------------|
| O(1B) | 47(4)           | 23(2)           | 13(2)           | 0(1)            | -6(2)           | -2(3)           |
| O(1A) | 70(4)           | 20(2)           | 16(2)           | 0(1)            | -9(2)           | 6(3)            |
| O(2)  | 81(1)           | 23(1)           | 25(1)           | 3(1)            | -9(1)           | -4(1)           |
| O(3)  | 50(1)           | 31(1)           | 35(1)           | 4(1)            | -6(1)           | -13(1)          |
| O(4)  | 43(1)           | 40(1)           | 24(1)           | 10(1)           | 9(1)            | -1(1)           |
| O(5)  | 59(1)           | 38(1)           | 22(1)           | -4(1)           | -10(1)          | -1(1)           |
| O(6)  | 87(1)           | 36(1)           | 31(1)           | -2(1)           | -4(1)           | -27(1)          |
| N(2)  | 29(1)           | 29(1)           | 26(1)           | 5(1)            | 4(1)            | -2(1)           |
| N(3)  | 48(1)           | 31(1)           | 24(1)           | -6(1)           | -1(1)           | -6(1)           |
| N(4)  | 28(1)           | 25(1)           | 23(1)           | 0(1)            | 1(1)            | -2(1)           |
| N(5)  | 33(1)           | 32(1)           | 30(1)           | 4(1)            | 6(1)            | -3(1)           |
| C(1)  | 34(1)           | 30(1)           | 22(1)           | -1(1)           | -2(1)           | 6(1)            |
| C(2B) | 22(2)           | 27(2)           | 26(2)           | 1(2)            | 4(2)            | -1(2)           |
| C(2A) | 31(2)           | 20(1)           | 20(2)           | -1(1)           | 3(1)            | 4(1)            |
| C(3B) | 30(3)           | 29(2)           | 17(2)           | -1(1)           | 2(2)            | 0(2)            |
| C(3A) | 33(2)           | 21(2)           | 19(2)           | 0(1)            | -2(1)           | -1(1)           |
| C(4B) | 39(3)           | 21(2)           | 14(2)           | 1(1)            | -1(2)           | 0(2)            |
| C(4A) | 50(3)           | 30(2)           | 13(2)           | 2(1)            | -4(2)           | 10(2)           |
| C(5B) | 36(3)           | 55(7)           | 19(3)           | -6(4)           | 0(2)            | -4(4)           |
| C(5A) | 49(3)           | 62(4)           | 23(2)           | 6(3)            | 6(2)            | 22(3)           |
| C(6B) | 31(2)           | 37(3)           | 26(3)           | -4(3)           | 8(2)            | 2(3)            |
| C(6A) | 33(2)           | 38(4)           | 19(3)           | 2(3)            | -3(2)           | -4(3)           |
| C(7)  | 54(1)           | 24(1)           | 24(1)           | -2(1)           | -7(1)           | 1(1)            |
| C(8)  | 48(1)           | 28(1)           | 26(1)           | -2(1)           | -4(1)           | 4(1)            |
| C(9)  | 34(1)           | 28(1)           | 29(1)           | -2(1)           | 2(1)            | 1(1)            |
| C(10) | 43(1)           | 29(1)           | 29(1)           | -2(1)           | 2(1)            | 5(1)            |
| C(11) | 49(1)           | 31(1)           | 37(1)           | 4(1)            | 6(1)            | 3(1)            |
| C(12) | 26(1)           | 26(1)           | 21(1)           | -1(1)           | 2(1)            | 3(1)            |
| C(13) | 34(1)           | 26(1)           | 28(1)           | -4(1)           | 1(1)            | -2(1)           |
| C(14) | 42(1)           | 25(1)           | 33(1)           | 6(1)            | 9(1)            | 2(1)            |
| C(15) | 39(1)           | 36(1)           | 22(1)           | 7(1)            | 5(1)            | 8(1)            |
| C(16) | 28(1)           | 33(1)           | 19(1)           | -1(1)           | 2(1)            | 5(1)            |
| C(17) | 25(1)           | 24(1)           | 21(1)           | 0(1)            | 3(1)            | 2(1)            |

SUPPORTING INFORMATION

---

|       |       |       |       |       |       |       |
|-------|-------|-------|-------|-------|-------|-------|
| C(18) | 40(1) | 45(1) | 21(1) | -4(1) | -6(1) | 4(1)  |
| C(19) | 39(1) | 29(1) | 35(1) | -6(1) | 4(1)  | 0(1)  |
| C(20) | 44(1) | 25(1) | 50(1) | -2(1) | 1(1)  | -3(1) |
| C(21) | 37(1) | 30(1) | 43(1) | 7(1)  | 2(1)  | -6(1) |
| C(22) | 58(1) | 22(1) | 20(1) | -2(1) | 0(1)  | 0(1)  |
| C(23) | 34(1) | 23(1) | 18(1) | -1(1) | 4(1)  | 3(1)  |
| C(24) | 26(1) | 23(1) | 22(1) | -3(1) | 3(1)  | 0(1)  |
| C(25) | 25(1) | 24(1) | 22(1) | 2(1)  | 5(1)  | 1(1)  |
| C(26) | 30(1) | 30(1) | 17(1) | 1(1)  | 4(1)  | 3(1)  |
| C(27) | 34(1) | 25(1) | 20(1) | -6(1) | 2(1)  | -1(1) |
| C(28) | 36(1) | 22(1) | 21(1) | -1(1) | 5(1)  | 1(1)  |

---

## SUPPORTING INFORMATION

Table S6. Hydrogen coordinates ( $\times 10^4$ ) and isotropic displacement parameters ( $\text{\AA}^2 \times 10^3$ ) for 3,5-dinitrobenzoylated derivative of **6a**.

|        | x     | y    | z    | U(eq) |
|--------|-------|------|------|-------|
| H(1AA) | 4709  | 6080 | 1162 | 35    |
| H(1AB) | 6651  | 6226 | 1096 | 35    |
| H(1BC) | 4376  | 6262 | 1437 | 35    |
| H(1BD) | 6048  | 6061 | 992  | 35    |
| H(2BA) | 4294  | 6662 | 2100 | 30    |
| H(2BB) | 6255  | 6793 | 2062 | 30    |
| H(2AA) | 5864  | 6822 | 2076 | 29    |
| H(2AB) | 7529  | 6642 | 1582 | 29    |
| H(4B)  | 7224  | 6984 | 3866 | 30    |
| H(4A)  | 6773  | 7010 | 3912 | 38    |
| H(5BA) | 10132 | 6816 | 3912 | 56    |
| H(5BB) | 9027  | 6642 | 2633 | 56    |
| H(5BC) | 9675  | 6324 | 3762 | 56    |
| H(5AA) | 4267  | 6416 | 4437 | 67    |
| H(5AB) | 3951  | 6718 | 3240 | 67    |
| H(5AC) | 4186  | 6916 | 4613 | 67    |
| H(6BA) | 3452  | 6318 | 3806 | 47    |
| H(6BB) | 4108  | 6796 | 4019 | 47    |
| H(6BC) | 4775  | 6445 | 5050 | 47    |
| H(6AA) | 9810  | 6415 | 4314 | 46    |
| H(6AB) | 9539  | 6762 | 3228 | 46    |
| H(6AC) | 9764  | 6275 | 2893 | 46    |
| H(7BC) | 5382  | 5920 | 3291 | 42    |
| H(7BD) | 7143  | 5750 | 2886 | 42    |
| H(7AA) | 5722  | 5758 | 3031 | 42    |
| H(7AB) | 7683  | 5919 | 3039 | 42    |
| H(8A)  | 8422  | 5853 | 5161 | 42    |
| H(8B)  | 6413  | 5833 | 5342 | 42    |
| H(9A)  | 6153  | 5148 | 4430 | 37    |
| H(9B)  | 8163  | 5169 | 4249 | 37    |
| H(10A) | 9051  | 5199 | 6459 | 41    |
| H(10B) | 7040  | 5168 | 6627 | 41    |

SUPPORTING INFORMATION

---

|        |       |      |       |    |
|--------|-------|------|-------|----|
| H(11A) | 6870  | 4479 | 5796  | 59 |
| H(11B) | 8413  | 4506 | 6981  | 59 |
| H(11C) | 8873  | 4510 | 5601  | 59 |
| H(13)  | 5804  | 7096 | 121   | 36 |
| H(14)  | 4845  | 7350 | -1882 | 39 |
| H(15)  | 3304  | 6915 | -3410 | 38 |
| H(18A) | 3038  | 5929 | -3676 | 55 |
| H(18B) | 1614  | 6298 | -3977 | 55 |
| H(18C) | 1416  | 5951 | -2941 | 55 |
| H(19)  | 4639  | 5432 | -2007 | 42 |
| H(20)  | 3110  | 4841 | -1097 | 49 |
| H(21)  | 1496  | 5176 | 456   | 45 |
| H(24)  | 7751  | 6230 | 7341  | 29 |
| H(26)  | 10417 | 6525 | 10791 | 31 |
| H(28)  | 10002 | 7389 | 7979  | 31 |

---



## SUPPORTING INFORMATION

Table S7. Torsion angles [°] for 3,5-dinitrobenzoylated derivative of **6a**.

|                         |             |
|-------------------------|-------------|
| C(19)-N(4)-N(5)-C(21)   | 0.39(19)    |
| C(17)-N(4)-N(5)-C(21)   | 174.43(15)  |
| C(12)-C(1)-C(2B)-C(3B)  | 177.9(3)    |
| C(12)-C(1)-C(2A)-C(3A)  | -177.0(3)   |
| C(1)-C(2B)-C(3B)-C(4B)  | 120.0(5)    |
| C(1)-C(2B)-C(3B)-C(6B)  | -124.1(5)   |
| C(1)-C(2B)-C(3B)-C(7)   | 3.5(6)      |
| C(1)-C(2A)-C(3A)-C(4A)  | -117.5(4)   |
| C(1)-C(2A)-C(3A)-C(6A)  | 125.9(4)    |
| C(1)-C(2A)-C(3A)-C(7)   | 1.4(5)      |
| C(22)-O(1B)-C(4B)-C(5B) | 103.0(6)    |
| C(22)-O(1B)-C(4B)-C(3B) | -131.0(5)   |
| C(2B)-C(3B)-C(4B)-O(1B) | 169.0(4)    |
| C(6B)-C(3B)-C(4B)-O(1B) | 55.5(5)     |
| C(7)-C(3B)-C(4B)-O(1B)  | -74.6(5)    |
| C(2B)-C(3B)-C(4B)-C(5B) | -69.9(7)    |
| C(6B)-C(3B)-C(4B)-C(5B) | 176.7(7)    |
| C(7)-C(3B)-C(4B)-C(5B)  | 46.5(7)     |
| C(22)-O(1A)-C(4A)-C(5A) | -107.6(5)   |
| C(22)-O(1A)-C(4A)-C(3A) | 125.6(5)    |
| C(2A)-C(3A)-C(4A)-O(1A) | -171.6(4)   |
| C(6A)-C(3A)-C(4A)-O(1A) | -57.4(6)    |
| C(7)-C(3A)-C(4A)-O(1A)  | 69.6(4)     |
| C(2A)-C(3A)-C(4A)-C(5A) | 66.8(4)     |
| C(6A)-C(3A)-C(4A)-C(5A) | -179.0(5)   |
| C(7)-C(3A)-C(4A)-C(5A)  | -52.0(4)    |
| C(2B)-C(3B)-C(7)-C(8)   | -179.4(3)   |
| C(4B)-C(3B)-C(7)-C(8)   | 66.7(3)     |
| C(6B)-C(3B)-C(7)-C(8)   | -58.8(4)    |
| C(2A)-C(3A)-C(7)-C(8)   | -176.5(2)   |
| C(4A)-C(3A)-C(7)-C(8)   | -61.7(3)    |
| C(6A)-C(3A)-C(7)-C(8)   | 63.2(5)     |
| C(3B)-C(7)-C(8)-C(9)    | 162.2(2)    |
| C(3A)-C(7)-C(8)-C(9)    | -155.9(2)   |
| C(7)-C(8)-C(9)-C(10)    | 180.00(16)  |
| C(8)-C(9)-C(10)-C(11)   | -178.75(16) |

## SUPPORTING INFORMATION

---

|                         |             |
|-------------------------|-------------|
| C(2B)-C(1)-C(12)-C(13)  | 36.3(4)     |
| C(2A)-C(1)-C(12)-C(13)  | -7.4(3)     |
| C(2B)-C(1)-C(12)-C(17)  | -143.8(3)   |
| C(2A)-C(1)-C(12)-C(17)  | 172.5(2)    |
| C(17)-C(12)-C(13)-C(14) | 0.1(2)      |
| C(1)-C(12)-C(13)-C(14)  | -179.98(16) |
| C(12)-C(13)-C(14)-C(15) | 0.1(3)      |
| C(13)-C(14)-C(15)-C(16) | 0.0(3)      |
| C(14)-C(15)-C(16)-C(17) | -0.2(3)     |
| C(14)-C(15)-C(16)-C(18) | 177.41(16)  |
| C(15)-C(16)-C(17)-C(12) | 0.4(2)      |
| C(18)-C(16)-C(17)-C(12) | -177.18(15) |
| C(15)-C(16)-C(17)-N(4)  | 178.44(14)  |
| C(18)-C(16)-C(17)-N(4)  | 0.9(2)      |
| C(13)-C(12)-C(17)-C(16) | -0.4(2)     |
| C(1)-C(12)-C(17)-C(16)  | 179.74(15)  |
| C(13)-C(12)-C(17)-N(4)  | -178.37(14) |
| C(1)-C(12)-C(17)-N(4)   | 1.7(2)      |
| C(19)-N(4)-C(17)-C(16)  | 58.3(2)     |
| N(5)-N(4)-C(17)-C(16)   | -114.59(17) |
| C(19)-N(4)-C(17)-C(12)  | -123.60(18) |
| N(5)-N(4)-C(17)-C(12)   | 63.5(2)     |
| N(5)-N(4)-C(19)-C(20)   | -0.2(2)     |
| C(17)-N(4)-C(19)-C(20)  | -173.56(16) |
| N(4)-C(19)-C(20)-C(21)  | -0.1(2)     |
| N(4)-N(5)-C(21)-C(20)   | -0.5(2)     |
| C(19)-C(20)-C(21)-N(5)  | 0.4(2)      |
| C(4B)-O(1B)-C(22)-O(2)  | -4.4(7)     |
| C(4B)-O(1B)-C(22)-C(23) | -171.6(4)   |
| C(4A)-O(1A)-C(22)-O(2)  | 2.8(7)      |
| C(4A)-O(1A)-C(22)-C(23) | 173.8(4)    |
| O(2)-C(22)-C(23)-C(28)  | -15.3(3)    |
| O(1B)-C(22)-C(23)-C(28) | 152.2(4)    |
| O(1A)-C(22)-C(23)-C(28) | 173.7(3)    |
| O(2)-C(22)-C(23)-C(24)  | 165.16(19)  |
| O(1B)-C(22)-C(23)-C(24) | -27.3(4)    |
| O(1A)-C(22)-C(23)-C(24) | -5.9(4)     |
| C(28)-C(23)-C(24)-C(25) | 1.1(2)      |

SUPPORTING INFORMATION

---

|                         |             |
|-------------------------|-------------|
| C(22)-C(23)-C(24)-C(25) | -179.40(15) |
| C(23)-C(24)-C(25)-C(26) | -1.4(2)     |
| C(23)-C(24)-C(25)-N(2)  | 178.94(14)  |
| O(4)-N(2)-C(25)-C(24)   | -166.49(14) |
| O(3)-N(2)-C(25)-C(24)   | 13.2(2)     |
| O(4)-N(2)-C(25)-C(26)   | 13.9(2)     |
| O(3)-N(2)-C(25)-C(26)   | -166.43(15) |
| C(24)-C(25)-C(26)-C(27) | 0.8(2)      |
| N(2)-C(25)-C(26)-C(27)  | -179.58(14) |
| C(25)-C(26)-C(27)-C(28) | 0.2(2)      |
| C(25)-C(26)-C(27)-N(3)  | -178.82(15) |
| O(5)-N(3)-C(27)-C(26)   | -2.6(2)     |
| O(6)-N(3)-C(27)-C(26)   | 177.15(17)  |
| O(5)-N(3)-C(27)-C(28)   | 178.31(16)  |
| O(6)-N(3)-C(27)-C(28)   | -1.9(2)     |
| C(26)-C(27)-C(28)-C(23) | -0.5(3)     |
| N(3)-C(27)-C(28)-C(23)  | 178.53(15)  |
| C(24)-C(23)-C(28)-C(27) | -0.2(2)     |
| C(22)-C(23)-C(28)-C(27) | -179.69(15) |

---

Symmetry transformations used to generate equivalent atoms:

## SUPPORTING INFORMATION

**Experimental for 3,5-dinitrobenzoylated derivative of 8a**

Low-temperature diffraction data ( $\omega$ -scans) were collected on a Rigaku MicroMax-007HF diffractometer coupled to a Saturn994+ CCD detector with Cu K $\alpha$  ( $\lambda = 1.54178 \text{ \AA}$ ) for the structure of 3,5-dinitrobenzoylated derivative of **8a**. The diffraction images were processed and scaled using Rigaku Oxford Diffraction software (CrysAlisPro; Rigaku OD: The Woodlands, TX, 2015). The structure was solved with SHELXT and was refined against  $F^2$  on all data by full-matrix least squares with SHELXL (Sheldrick, G. M. Acta Cryst. 2008, A64, 112–122). All non-hydrogen atoms were refined anisotropically. Hydrogen atoms were included in the model at geometrically calculated positions and refined using a riding model. The isotropic displacement parameters of all hydrogen atoms were fixed to 1.2 times the U value of the atoms to which they are linked (1.5 times for methyl groups). The full numbering scheme of compound 3,5-dinitrobenzoylated derivative of **8a** can be found in the full details of the X-ray structure determination (CIF), which is included as Supporting Information. CCDC number 1917394 (007b-19053) contains the supplementary crystallographic data for this paper. These data can be obtained free of charge from The Cambridge Crystallographic Data Center via [www.ccdc.cam.ac.uk/data\\_request/cif](http://www.ccdc.cam.ac.uk/data_request/cif).

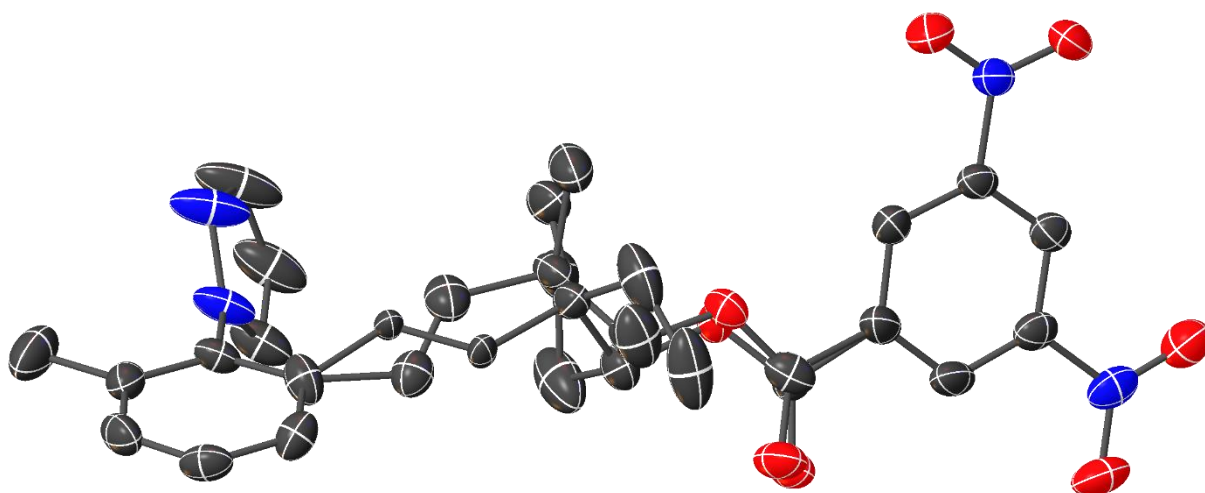

Figure S3. The complete model of **3,5-dinitrobenzoylated derivative of 8a** with 50% thermal ellipsoid probability levels. The hydrogen atoms are shown as circles for clarity.

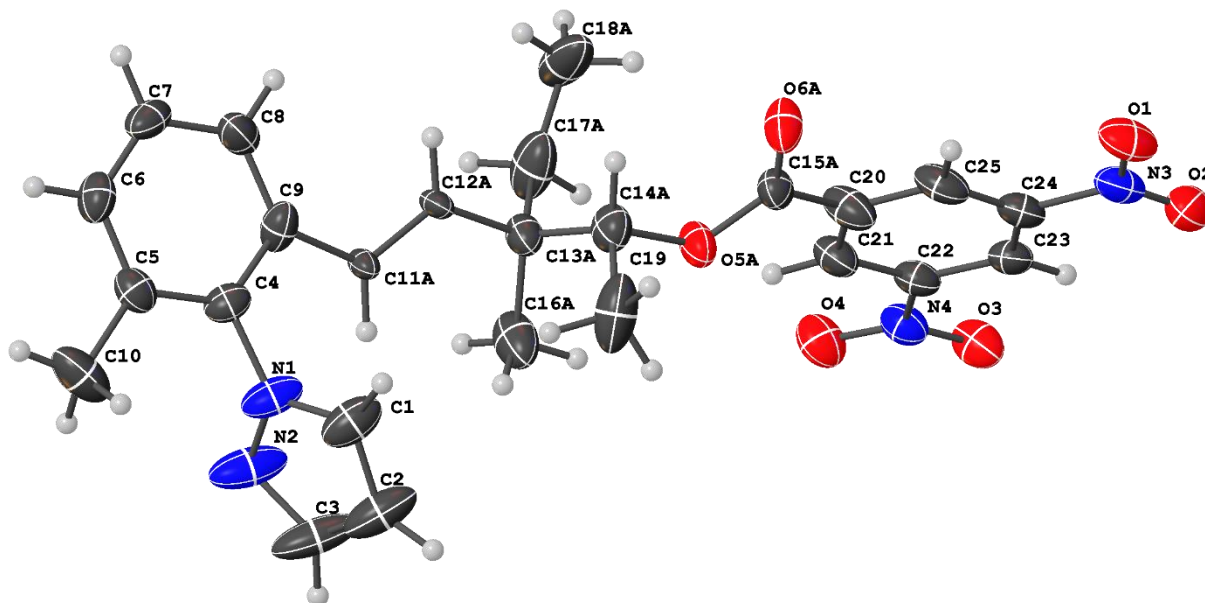

Figure S4. The complete numbering scheme of **3,5-dinitrobenzoylated derivative of 8a** part 1 with 50% thermal ellipsoid probability levels. The hydrogen atoms are shown as circles for clarity.

## SUPPORTING INFORMATION

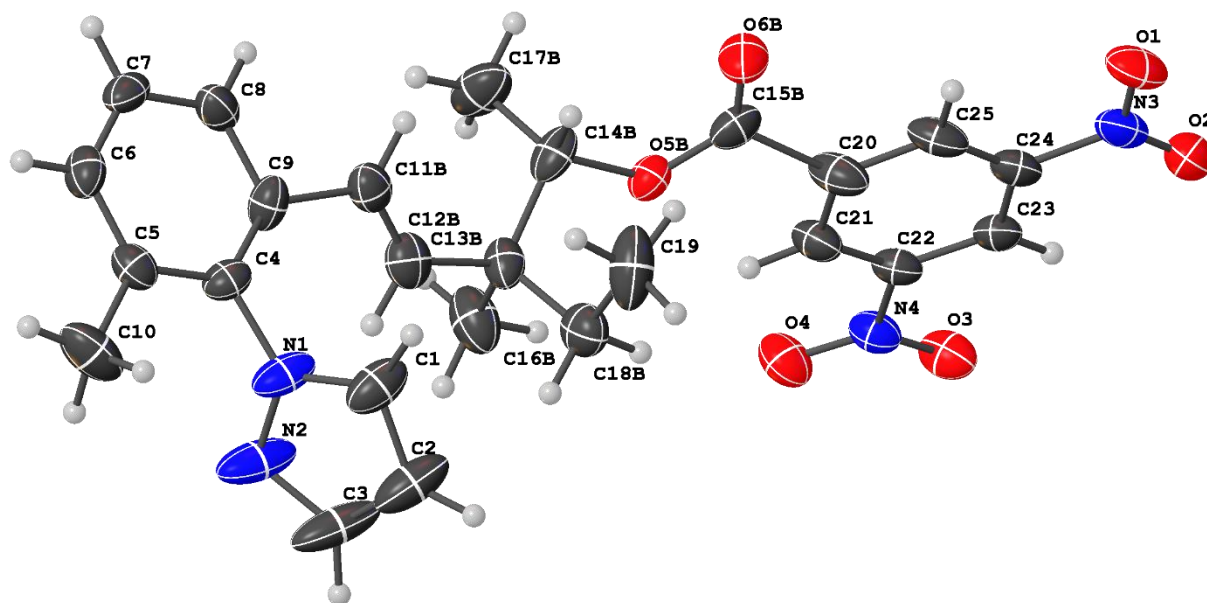

Figure S5. The complete numbering scheme of 3,5-dinitrobenzoylated derivative of **8a** part 2 with 50% thermal ellipsoid probability levels. The hydrogen atoms are shown as circles for clarity.

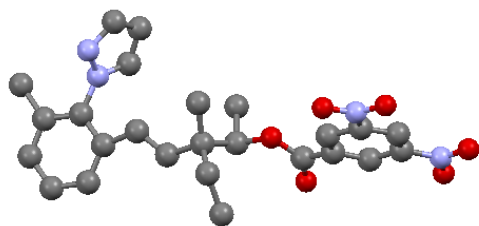

Figure S6. Another perspective of the crystal structure showing the indicated relative stereochemistry. The hydrogen atoms are omitted for clarity.

## SUPPORTING INFORMATION

Table S8. Crystal data and structure refinement for 3,5-dinitrobenzoylated derivative of **8a**.

|                                   |                                                               |                 |
|-----------------------------------|---------------------------------------------------------------|-----------------|
| Identification code               | 007b-19053                                                    |                 |
| Empirical formula                 | C <sub>25</sub> H <sub>26</sub> N <sub>4</sub> O <sub>6</sub> |                 |
| Formula weight                    | 478.50                                                        |                 |
| Temperature                       | 93(2) K                                                       |                 |
| Wavelength                        | 1.54184 Å                                                     |                 |
| Crystal system                    | Monoclinic                                                    |                 |
| Space group                       | P2 <sub>1</sub> /n                                            |                 |
| Unit cell dimensions              | a = 10.8001(2) Å                                              | α = 90°.        |
|                                   | b = 12.4294(2) Å                                              | β = 98.830(2)°. |
|                                   | c = 17.9310(3) Å                                              | γ = 90°.        |
| Volume                            | 2378.51(7) Å <sup>3</sup>                                     |                 |
| Z                                 | 4                                                             |                 |
| Density (calculated)              | 1.336 Mg/m <sup>3</sup>                                       |                 |
| Absorption coefficient            | 0.804 mm <sup>-1</sup>                                        |                 |
| F(000)                            | 1008                                                          |                 |
| Crystal size                      | 0.220 x 0.210 x 0.040 mm <sup>3</sup>                         |                 |
| Crystal color and habit           | Colorless Block                                               |                 |
| Diffractometer                    | Rigaku Saturn 944+ CCD                                        |                 |
| Theta range for data collection   | 4.345 to 66.597°.                                             |                 |
| Index ranges                      | -12 ≤ h ≤ 12, -14 ≤ k ≤ 14, -21 ≤ l ≤ 21                      |                 |
| Reflections collected             | 82818                                                         |                 |
| Independent reflections           | 4203 [R(int) = 0.0521]                                        |                 |
| Observed reflections (I > 2σ(I))  | 3977                                                          |                 |
| Completeness to theta = 66.597°   | 100.0 %                                                       |                 |
| Absorption correction             | Semi-empirical from equivalents                               |                 |
| Max. and min. transmission        | 1.00000 and 0.75370                                           |                 |
| Solution method                   | SHELXT-2014/5 (Sheldrick, 2014)                               |                 |
| Refinement method                 | SHELXL-2014/7 (Sheldrick, 2014)                               |                 |
| Data / restraints / parameters    | 4203 / 84 / 414                                               |                 |
| Goodness-of-fit on F <sup>2</sup> | 1.140                                                         |                 |
| Final R indices [I > 2σ(I)]       | R1 = 0.0579, wR2 = 0.1419                                     |                 |
| R indices (all data)              | R1 = 0.0603, wR2 = 0.1435                                     |                 |
| Extinction coefficient            | 0.0117(5)                                                     |                 |
| Largest diff. peak and hole       | 0.465 and -0.277 e.Å <sup>-3</sup>                            |                 |

## SUPPORTING INFORMATION

Table S9. Atomic coordinates ( $\times 10^4$ ) and equivalent isotropic displacement parameters ( $\text{\AA}^2 \times 10^3$ ) for 3,5-dinitrobenzoylated derivative of **8a**.  $U(\text{eq})$  is defined as one third of the trace of the orthogonalized  $U^{ij}$  tensor.

|        | x       | y       | z       | $U(\text{eq})$ |
|--------|---------|---------|---------|----------------|
| O(1)   | 7333(2) | 6016(1) | 612(1)  | 53(1)          |
| O(2)   | 7177(2) | 4872(1) | -312(1) | 50(1)          |
| O(3)   | 4534(2) | 1780(1) | -326(1) | 47(1)          |
| O(4)   | 3519(2) | 1485(1) | 606(1)  | 50(1)          |
| N(1)   | 4062(2) | 2118(2) | 6409(1) | 47(1)          |
| N(2)   | 3817(2) | 1058(2) | 6284(2) | 67(1)          |
| N(3)   | 6944(2) | 5172(2) | 301(1)  | 43(1)          |
| N(4)   | 4251(2) | 2005(1) | 292(1)  | 38(1)          |
| C(1)   | 5244(2) | 2373(2) | 6311(2) | 53(1)          |
| C(2)   | 5806(3) | 1447(3) | 6127(2) | 67(1)          |
| C(3)   | 4893(3) | 669(3)  | 6110(2) | 78(1)          |
| C(4)   | 3076(2) | 2860(2) | 6487(1) | 34(1)          |
| C(5)   | 2653(2) | 2941(2) | 7180(1) | 36(1)          |
| C(6)   | 1758(2) | 3709(2) | 7251(1) | 40(1)          |
| C(7)   | 1306(2) | 4385(2) | 6657(1) | 40(1)          |
| C(8)   | 1728(2) | 4280(2) | 5970(1) | 40(1)          |
| C(9)   | 2606(2) | 3496(2) | 5867(1) | 39(1)          |
| C(10)  | 3173(3) | 2232(2) | 7835(2) | 63(1)          |
| C(19)  | 5706(3) | 3625(3) | 4240(2) | 72(1)          |
| C(20)  | 5033(3) | 4180(2) | 1718(1) | 48(1)          |
| C(21)  | 4533(2) | 3235(2) | 1379(1) | 39(1)          |
| C(22)  | 4826(2) | 2967(2) | 680(1)  | 34(1)          |
| C(23)  | 5624(2) | 3572(2) | 319(1)  | 34(1)          |
| C(24)  | 6112(2) | 4496(2) | 679(1)  | 36(1)          |
| C(25)  | 5818(2) | 4819(2) | 1368(1) | 43(1)          |
| O(5A)  | 4626(4) | 3723(2) | 2891(2) | 40(1)          |
| O(6A)  | 5102(5) | 5466(7) | 2681(4) | 46(1)          |
| C(11A) | 3003(4) | 3078(4) | 5159(2) | 23(1)          |
| C(12A) | 2900(3) | 3684(3) | 4521(2) | 25(1)          |
| C(13A) | 3271(6) | 3334(5) | 3786(3) | 35(1)          |
| C(14A) | 4399(4) | 3964(4) | 3665(2) | 42(1)          |
| C(15A) | 4968(6) | 4538(4) | 2485(3) | 32(1)          |
| C(16A) | 3587(7) | 2122(5) | 3770(3) | 59(2)          |

SUPPORTING INFORMATION

---

|        |         |         |         |       |
|--------|---------|---------|---------|-------|
| C(17A) | 2145(5) | 3549(7) | 3147(3) | 66(2) |
| C(18A) | 1895(6) | 4748(7) | 2955(4) | 74(2) |
| O(5B)  | 3720(4) | 3809(3) | 2706(2) | 35(1) |
| O(6B)  | 4605(7) | 5439(8) | 2708(6) | 49(2) |
| C(11B) | 2951(5) | 3699(7) | 5085(3) | 40(1) |
| C(12B) | 3211(5) | 2927(5) | 4688(4) | 44(1) |
| C(13B) | 3501(7) | 2907(7) | 3874(4) | 37(2) |
| C(14B) | 3248(5) | 3994(5) | 3427(3) | 42(1) |
| C(15B) | 4371(7) | 4565(6) | 2430(4) | 38(2) |
| C(16B) | 2774(8) | 1992(6) | 3469(4) | 58(2) |
| C(17B) | 1845(7) | 4233(8) | 3266(4) | 59(2) |
| C(18B) | 4916(5) | 2639(5) | 3958(3) | 48(1) |

---



## SUPPORTING INFORMATION

Table S10. Bond lengths [Å] and angles [°] for 3,5-dinitrobenzoylated derivative of **8a**.

---

|              |          |
|--------------|----------|
| O(1)-N(3)    | 1.230(2) |
| O(2)-N(3)    | 1.224(3) |
| O(3)-N(4)    | 1.227(2) |
| O(4)-N(4)    | 1.223(2) |
| N(1)-C(1)    | 1.353(3) |
| N(1)-N(2)    | 1.355(3) |
| N(1)-C(4)    | 1.432(3) |
| N(2)-C(3)    | 1.339(4) |
| N(3)-C(24)   | 1.469(3) |
| N(4)-C(22)   | 1.472(3) |
| C(1)-C(2)    | 1.365(4) |
| C(1)-H(1)    | 0.9500   |
| C(2)-C(3)    | 1.377(5) |
| C(2)-H(2)    | 0.9500   |
| C(3)-H(3)    | 0.9500   |
| C(4)-C(5)    | 1.392(3) |
| C(4)-C(9)    | 1.394(3) |
| C(5)-C(6)    | 1.378(3) |
| C(5)-C(10)   | 1.507(3) |
| C(6)-C(7)    | 1.386(3) |
| C(6)-H(6)    | 0.9500   |
| C(7)-C(8)    | 1.384(3) |
| C(7)-H(7)    | 0.9500   |
| C(8)-C(9)    | 1.392(3) |
| C(8)-H(8)    | 0.9500   |
| C(9)-C(11A)  | 1.495(5) |
| C(9)-C(11B)  | 1.526(6) |
| C(10)-H(10A) | 0.9800   |
| C(10)-H(10B) | 0.9800   |
| C(10)-H(10C) | 0.9800   |
| C(19)-C(18B) | 1.535(6) |
| C(19)-C(14A) | 1.669(6) |
| C(19)-H(19A) | 0.9800   |
| C(19)-H(19B) | 0.9800   |
| C(19)-H(19C) | 0.9800   |
| C(19)-H(19D) | 0.9800   |

SUPPORTING INFORMATION

---

|               |           |
|---------------|-----------|
| C(19)-H(19E)  | 0.9800    |
| C(19)-H(19F)  | 0.9800    |
| C(20)-C(25)   | 1.381(4)  |
| C(20)-C(21)   | 1.392(3)  |
| C(20)-C(15A)  | 1.458(6)  |
| C(20)-C(15B)  | 1.628(7)  |
| C(21)-C(22)   | 1.380(3)  |
| C(21)-H(21)   | 0.9500    |
| C(22)-C(23)   | 1.378(3)  |
| C(23)-C(24)   | 1.382(3)  |
| C(23)-H(23)   | 0.9500    |
| C(24)-C(25)   | 1.381(3)  |
| C(25)-H(25)   | 0.9500    |
| O(5A)-C(15A)  | 1.331(6)  |
| O(5A)-C(14A)  | 1.478(5)  |
| O(6A)-C(15A)  | 1.208(9)  |
| C(11A)-C(12A) | 1.360(6)  |
| C(11A)-H(11A) | 0.9500    |
| C(12A)-C(13A) | 1.499(7)  |
| C(12A)-H(12A) | 0.9500    |
| C(13A)-C(14A) | 1.492(8)  |
| C(13A)-C(16A) | 1.546(7)  |
| C(13A)-C(17A) | 1.562(9)  |
| C(14A)-H(14A) | 1.0000    |
| C(16A)-H(16A) | 0.9800    |
| C(16A)-H(16B) | 0.9800    |
| C(16A)-H(16C) | 0.9800    |
| C(17A)-C(18A) | 1.544(10) |
| C(17A)-H(17A) | 0.9900    |
| C(17A)-H(17B) | 0.9900    |
| C(18A)-H(18A) | 0.9800    |
| C(18A)-H(18B) | 0.9800    |
| C(18A)-H(18C) | 0.9800    |
| O(5B)-C(15B)  | 1.315(9)  |
| O(5B)-C(14B)  | 1.478(6)  |
| O(6B)-C(15B)  | 1.206(11) |
| C(11B)-C(12B) | 1.253(10) |
| C(11B)-H(11B) | 0.9500    |

SUPPORTING INFORMATION

---

|                 |            |
|-----------------|------------|
| C(12B)-C(13B)   | 1.539(10)  |
| C(12B)-H(12B)   | 0.9500     |
| C(13B)-C(16B)   | 1.504(10)  |
| C(13B)-C(18B)   | 1.548(10)  |
| C(13B)-C(14B)   | 1.574(9)   |
| C(14B)-C(17B)   | 1.528(9)   |
| C(14B)-H(14B)   | 1.0000     |
| C(16B)-H(16D)   | 0.9800     |
| C(16B)-H(16E)   | 0.9800     |
| C(16B)-H(16F)   | 0.9800     |
| C(17B)-H(17C)   | 0.9800     |
| C(17B)-H(17D)   | 0.9800     |
| C(17B)-H(17E)   | 0.9800     |
| C(18B)-H(18D)   | 0.9900     |
| C(18B)-H(18E)   | 0.9900     |
|                 |            |
| C(1)-N(1)-N(2)  | 111.7(2)   |
| C(1)-N(1)-C(4)  | 126.3(2)   |
| N(2)-N(1)-C(4)  | 120.88(19) |
| C(3)-N(2)-N(1)  | 103.6(2)   |
| O(2)-N(3)-O(1)  | 124.3(2)   |
| O(2)-N(3)-C(24) | 117.71(18) |
| O(1)-N(3)-C(24) | 118.0(2)   |
| O(4)-N(4)-O(3)  | 124.33(18) |
| O(4)-N(4)-C(22) | 117.89(18) |
| O(3)-N(4)-C(22) | 117.78(18) |
| N(1)-C(1)-C(2)  | 107.3(3)   |
| N(1)-C(1)-H(1)  | 126.4      |
| C(2)-C(1)-H(1)  | 126.4      |
| C(1)-C(2)-C(3)  | 104.7(2)   |
| C(1)-C(2)-H(2)  | 127.6      |
| C(3)-C(2)-H(2)  | 127.6      |
| N(2)-C(3)-C(2)  | 112.6(2)   |
| N(2)-C(3)-H(3)  | 123.7      |
| C(2)-C(3)-H(3)  | 123.7      |
| C(5)-C(4)-C(9)  | 122.76(19) |
| C(5)-C(4)-N(1)  | 119.0(2)   |
| C(9)-C(4)-N(1)  | 118.27(19) |

SUPPORTING INFORMATION

---

|                     |            |
|---------------------|------------|
| C(6)-C(5)-C(4)      | 117.6(2)   |
| C(6)-C(5)-C(10)     | 121.0(2)   |
| C(4)-C(5)-C(10)     | 121.4(2)   |
| C(5)-C(6)-C(7)      | 121.2(2)   |
| C(5)-C(6)-H(6)      | 119.4      |
| C(7)-C(6)-H(6)      | 119.4      |
| C(8)-C(7)-C(6)      | 120.2(2)   |
| C(8)-C(7)-H(7)      | 119.9      |
| C(6)-C(7)-H(7)      | 119.9      |
| C(7)-C(8)-C(9)      | 120.5(2)   |
| C(7)-C(8)-H(8)      | 119.8      |
| C(9)-C(8)-H(8)      | 119.8      |
| C(8)-C(9)-C(4)      | 117.65(19) |
| C(8)-C(9)-C(11A)    | 130.3(3)   |
| C(4)-C(9)-C(11A)    | 111.3(2)   |
| C(8)-C(9)-C(11B)    | 105.9(3)   |
| C(4)-C(9)-C(11B)    | 135.6(3)   |
| C(5)-C(10)-H(10A)   | 109.5      |
| C(5)-C(10)-H(10B)   | 109.5      |
| H(10A)-C(10)-H(10B) | 109.5      |
| C(5)-C(10)-H(10C)   | 109.5      |
| H(10A)-C(10)-H(10C) | 109.5      |
| H(10B)-C(10)-H(10C) | 109.5      |
| C(14A)-C(19)-H(19A) | 109.5      |
| C(14A)-C(19)-H(19B) | 109.5      |
| H(19A)-C(19)-H(19B) | 109.5      |
| C(14A)-C(19)-H(19C) | 109.5      |
| H(19A)-C(19)-H(19C) | 109.5      |
| H(19B)-C(19)-H(19C) | 109.5      |
| C(18B)-C(19)-H(19D) | 109.5      |
| C(18B)-C(19)-H(19E) | 109.5      |
| H(19D)-C(19)-H(19E) | 109.5      |
| C(18B)-C(19)-H(19F) | 109.5      |
| H(19D)-C(19)-H(19F) | 109.5      |
| H(19E)-C(19)-H(19F) | 109.5      |
| C(25)-C(20)-C(21)   | 120.8(2)   |
| C(25)-C(20)-C(15A)  | 112.0(3)   |
| C(21)-C(20)-C(15A)  | 126.7(3)   |

SUPPORTING INFORMATION

---

|                      |            |
|----------------------|------------|
| C(25)-C(20)-C(15B)   | 124.1(3)   |
| C(21)-C(20)-C(15B)   | 113.7(3)   |
| C(22)-C(21)-C(20)    | 118.1(2)   |
| C(22)-C(21)-H(21)    | 120.9      |
| C(20)-C(21)-H(21)    | 120.9      |
| C(23)-C(22)-C(21)    | 122.83(19) |
| C(23)-C(22)-N(4)     | 118.09(18) |
| C(21)-C(22)-N(4)     | 119.07(19) |
| C(22)-C(23)-C(24)    | 117.1(2)   |
| C(22)-C(23)-H(23)    | 121.4      |
| C(24)-C(23)-H(23)    | 121.4      |
| C(25)-C(24)-C(23)    | 122.3(2)   |
| C(25)-C(24)-N(3)     | 119.16(19) |
| C(23)-C(24)-N(3)     | 118.5(2)   |
| C(20)-C(25)-C(24)    | 118.7(2)   |
| C(20)-C(25)-H(25)    | 120.6      |
| C(24)-C(25)-H(25)    | 120.6      |
| C(15A)-O(5A)-C(14A)  | 117.3(3)   |
| C(12A)-C(11A)-C(9)   | 121.7(4)   |
| C(12A)-C(11A)-H(11A) | 119.2      |
| C(9)-C(11A)-H(11A)   | 119.2      |
| C(11A)-C(12A)-C(13A) | 125.4(4)   |
| C(11A)-C(12A)-H(12A) | 117.3      |
| C(13A)-C(12A)-H(12A) | 117.3      |
| C(14A)-C(13A)-C(12A) | 108.0(5)   |
| C(14A)-C(13A)-C(16A) | 108.8(5)   |
| C(12A)-C(13A)-C(16A) | 112.9(5)   |
| C(14A)-C(13A)-C(17A) | 111.4(5)   |
| C(12A)-C(13A)-C(17A) | 108.2(5)   |
| C(16A)-C(13A)-C(17A) | 107.6(5)   |
| O(5A)-C(14A)-C(13A)  | 106.7(4)   |
| O(5A)-C(14A)-C(19)   | 106.4(3)   |
| C(13A)-C(14A)-C(19)  | 114.2(4)   |
| O(5A)-C(14A)-H(14A)  | 109.8      |
| C(13A)-C(14A)-H(14A) | 109.8      |
| C(19)-C(14A)-H(14A)  | 109.8      |
| O(6A)-C(15A)-O(5A)   | 126.7(5)   |
| O(6A)-C(15A)-C(20)   | 123.0(5)   |

SUPPORTING INFORMATION

---

|                      |          |
|----------------------|----------|
| O(5A)-C(15A)-C(20)   | 109.9(4) |
| C(13A)-C(16A)-H(16A) | 109.5    |
| C(13A)-C(16A)-H(16B) | 109.5    |
| H(16A)-C(16A)-H(16B) | 109.5    |
| C(13A)-C(16A)-H(16C) | 109.5    |
| H(16A)-C(16A)-H(16C) | 109.5    |
| H(16B)-C(16A)-H(16C) | 109.5    |
| C(18A)-C(17A)-C(13A) | 114.7(6) |
| C(18A)-C(17A)-H(17A) | 108.6    |
| C(13A)-C(17A)-H(17A) | 108.6    |
| C(18A)-C(17A)-H(17B) | 108.6    |
| C(13A)-C(17A)-H(17B) | 108.6    |
| H(17A)-C(17A)-H(17B) | 107.6    |
| C(17A)-C(18A)-H(18A) | 109.5    |
| C(17A)-C(18A)-H(18B) | 109.5    |
| H(18A)-C(18A)-H(18B) | 109.5    |
| C(17A)-C(18A)-H(18C) | 109.5    |
| H(18A)-C(18A)-H(18C) | 109.5    |
| H(18B)-C(18A)-H(18C) | 109.5    |
| C(15B)-O(5B)-C(14B)  | 119.6(4) |
| C(12B)-C(11B)-C(9)   | 120.2(7) |
| C(12B)-C(11B)-H(11B) | 119.9    |
| C(9)-C(11B)-H(11B)   | 119.9    |
| C(11B)-C(12B)-C(13B) | 130.3(7) |
| C(11B)-C(12B)-H(12B) | 114.8    |
| C(13B)-C(12B)-H(12B) | 114.8    |
| C(16B)-C(13B)-C(12B) | 107.7(6) |
| C(16B)-C(13B)-C(18B) | 108.5(6) |
| C(12B)-C(13B)-C(18B) | 104.7(5) |
| C(16B)-C(13B)-C(14B) | 111.5(6) |
| C(12B)-C(13B)-C(14B) | 115.2(6) |
| C(18B)-C(13B)-C(14B) | 109.0(5) |
| O(5B)-C(14B)-C(17B)  | 109.3(5) |
| O(5B)-C(14B)-C(13B)  | 104.8(4) |
| C(17B)-C(14B)-C(13B) | 110.7(6) |
| O(5B)-C(14B)-H(14B)  | 110.6    |
| C(17B)-C(14B)-H(14B) | 110.6    |
| C(13B)-C(14B)-H(14B) | 110.6    |

SUPPORTING INFORMATION

---

|                      |          |
|----------------------|----------|
| O(6B)-C(15B)-O(5B)   | 125.3(7) |
| O(6B)-C(15B)-C(20)   | 120.0(7) |
| O(5B)-C(15B)-C(20)   | 114.2(5) |
| C(13B)-C(16B)-H(16D) | 109.5    |
| C(13B)-C(16B)-H(16E) | 109.5    |
| H(16D)-C(16B)-H(16E) | 109.5    |
| C(13B)-C(16B)-H(16F) | 109.5    |
| H(16D)-C(16B)-H(16F) | 109.5    |
| H(16E)-C(16B)-H(16F) | 109.5    |
| C(14B)-C(17B)-H(17C) | 109.5    |
| C(14B)-C(17B)-H(17D) | 109.5    |
| H(17C)-C(17B)-H(17D) | 109.5    |
| C(14B)-C(17B)-H(17E) | 109.5    |
| H(17C)-C(17B)-H(17E) | 109.5    |
| H(17D)-C(17B)-H(17E) | 109.5    |
| C(19)-C(18B)-C(13B)  | 110.5(5) |
| C(19)-C(18B)-H(18D)  | 109.5    |
| C(13B)-C(18B)-H(18D) | 109.5    |
| C(19)-C(18B)-H(18E)  | 109.5    |
| C(13B)-C(18B)-H(18E) | 109.5    |
| H(18D)-C(18B)-H(18E) | 108.1    |

---

Symmetry transformations used to generate equivalent atoms:

## SUPPORTING INFORMATION

Table S11. Anisotropic displacement parameters ( $\text{\AA}^2 \times 10^3$ ) for 3,5-dinitrobenzoylated derivative of **8a**. The anisotropic displacement factor exponent takes the form:  $-2\pi^2 [ h^2 a^{*2} U^{11} + \dots + 2 h k a^* b^* U^{12} ]$

|        | U <sup>11</sup> | U <sup>22</sup> | U <sup>33</sup> | U <sup>23</sup> | U <sup>13</sup> | U <sup>12</sup> |
|--------|-----------------|-----------------|-----------------|-----------------|-----------------|-----------------|
| O(1)   | 57(1)           | 27(1)           | 72(1)           | 5(1)            | -1(1)           | -6(1)           |
| O(2)   | 52(1)           | 41(1)           | 59(1)           | 6(1)            | 16(1)           | 1(1)            |
| O(3)   | 70(1)           | 37(1)           | 33(1)           | -7(1)           | 2(1)            | -3(1)           |
| O(4)   | 62(1)           | 39(1)           | 47(1)           | -1(1)           | 7(1)            | -16(1)          |
| N(1)   | 37(1)           | 40(1)           | 60(1)           | -26(1)          | -5(1)           | 8(1)            |
| N(2)   | 46(1)           | 41(1)           | 105(2)          | -35(1)          | -16(1)          | 11(1)           |
| N(3)   | 40(1)           | 29(1)           | 57(1)           | 10(1)           | 1(1)            | 3(1)            |
| N(4)   | 50(1)           | 29(1)           | 34(1)           | -1(1)           | 0(1)            | -2(1)           |
| C(1)   | 38(1)           | 60(2)           | 59(2)           | -28(1)          | -1(1)           | 6(1)            |
| C(2)   | 42(1)           | 76(2)           | 77(2)           | -42(2)          | -10(1)          | 21(1)           |
| C(3)   | 50(2)           | 60(2)           | 113(3)          | -52(2)          | -25(2)          | 26(1)           |
| C(4)   | 35(1)           | 30(1)           | 37(1)           | -12(1)          | 2(1)            | 2(1)            |
| C(5)   | 45(1)           | 32(1)           | 32(1)           | 1(1)            | 3(1)            | -8(1)           |
| C(6)   | 47(1)           | 44(1)           | 34(1)           | -10(1)          | 16(1)           | -7(1)           |
| C(7)   | 36(1)           | 28(1)           | 58(1)           | -9(1)           | 14(1)           | 1(1)            |
| C(8)   | 35(1)           | 42(1)           | 44(1)           | 13(1)           | 6(1)            | 1(1)            |
| C(9)   | 32(1)           | 58(1)           | 29(1)           | -4(1)           | 7(1)            | 0(1)            |
| C(10)  | 72(2)           | 55(2)           | 56(2)           | 22(1)           | -8(1)           | -12(1)          |
| C(19)  | 55(2)           | 115(3)          | 49(2)           | -19(2)          | 21(1)           | -29(2)          |
| C(20)  | 82(2)           | 28(1)           | 32(1)           | -1(1)           | 4(1)            | 1(1)            |
| C(21)  | 59(1)           | 28(1)           | 32(1)           | 2(1)            | 7(1)            | 0(1)            |
| C(22)  | 43(1)           | 24(1)           | 32(1)           | 0(1)            | -2(1)           | 2(1)            |
| C(23)  | 40(1)           | 27(1)           | 34(1)           | 1(1)            | 2(1)            | 6(1)            |
| C(24)  | 41(1)           | 25(1)           | 40(1)           | 5(1)            | -2(1)           | 3(1)            |
| C(25)  | 64(2)           | 23(1)           | 37(1)           | 0(1)            | -6(1)           | -1(1)           |
| O(5A)  | 61(2)           | 32(2)           | 31(2)           | -1(1)           | 20(2)           | -3(1)           |
| O(6A)  | 61(4)           | 38(2)           | 45(2)           | -13(2)          | 27(3)           | -17(3)          |
| C(11A) | 36(2)           | 16(2)           | 19(2)           | 1(2)            | 9(1)            | 2(2)            |
| C(12A) | 39(2)           | 18(2)           | 20(2)           | 4(1)            | 7(1)            | 6(1)            |
| C(13A) | 50(3)           | 27(3)           | 31(2)           | -3(2)           | 15(2)           | -2(2)           |
| C(14A) | 51(3)           | 45(2)           | 32(2)           | -5(2)           | 14(2)           | 0(2)            |
| C(15A) | 35(3)           | 29(2)           | 32(2)           | -1(2)           | 10(3)           | -5(3)           |
| C(16A) | 97(5)           | 43(3)           | 42(3)           | -10(2)          | 31(3)           | -9(3)           |



SUPPORTING INFORMATION

---

|        |       |        |       |        |       |        |
|--------|-------|--------|-------|--------|-------|--------|
| C(17A) | 55(3) | 109(5) | 35(2) | -7(3)  | 13(2) | 1(3)   |
| C(18A) | 66(4) | 115(6) | 43(3) | 17(4)  | 13(3) | 51(4)  |
| O(5B)  | 33(2) | 38(2)  | 35(2) | -9(1)  | 8(2)  | 1(2)   |
| O(6B)  | 60(5) | 34(3)  | 57(3) | -14(2) | 22(4) | -8(4)  |
| C(11B) | 34(3) | 44(4)  | 40(4) | 5(3)   | 5(2)  | -3(2)  |
| C(12B) | 37(3) | 52(4)  | 41(3) | -3(2)  | 4(2)  | -11(2) |
| C(13B) | 44(3) | 38(4)  | 33(3) | -11(3) | 13(2) | -11(3) |
| C(14B) | 37(3) | 55(3)  | 36(3) | -23(2) | 10(2) | -1(2)  |
| C(15B) | 28(3) | 40(3)  | 44(3) | -11(2) | 0(3)  | 7(3)   |
| C(16B) | 75(4) | 63(4)  | 39(3) | -7(3)  | 15(3) | -25(3) |
| C(17B) | 61(4) | 73(5)  | 43(4) | 4(4)   | 5(3)  | 28(4)  |
| C(18B) | 61(3) | 50(3)  | 34(3) | 0(2)   | 15(2) | 0(2)   |

---

## SUPPORTING INFORMATION

Table S12. Hydrogen coordinates ( $\times 10^4$ ) and isotropic displacement parameters ( $\text{\AA}^2 \times 10^3$ ) for 3,5-dinitrobenzoylated derivative of **8a**.

|        | x    | y    | z    | U(eq) |
|--------|------|------|------|-------|
| H(1)   | 5614 | 3068 | 6360 | 63    |
| H(2)   | 6641 | 1358 | 6033 | 81    |
| H(3)   | 5014 | -63  | 5988 | 94    |
| H(6)   | 1446 | 3775 | 7716 | 49    |
| H(7)   | 706  | 4922 | 6722 | 48    |
| H(8)   | 1415 | 4747 | 5565 | 49    |
| H(10A) | 2979 | 1478 | 7706 | 94    |
| H(10B) | 2795 | 2431 | 8279 | 94    |
| H(10C) | 4084 | 2325 | 7948 | 94    |
| H(19A) | 6148 | 3064 | 4001 | 107   |
| H(19B) | 5490 | 3355 | 4717 | 107   |
| H(19C) | 6248 | 4258 | 4338 | 107   |
| H(19D) | 5602 | 4184 | 3849 | 107   |
| H(19E) | 6591 | 3418 | 4351 | 107   |
| H(19F) | 5431 | 3903 | 4699 | 107   |
| H(21)  | 4004 | 2787 | 1622 | 47    |
| H(23)  | 5830 | 3363 | -156 | 41    |
| H(25)  | 6150 | 5468 | 1597 | 52    |
| H(11A) | 3336 | 2371 | 5154 | 28    |
| H(12A) | 2566 | 4388 | 4543 | 30    |
| H(14A) | 4232 | 4751 | 3714 | 50    |
| H(16A) | 4231 | 1947 | 4200 | 88    |
| H(16B) | 3899 | 1951 | 3299 | 88    |
| H(16C) | 2830 | 1699 | 3802 | 88    |
| H(17A) | 2303 | 3171 | 2684 | 79    |
| H(17B) | 1380 | 3233 | 3299 | 79    |
| H(18A) | 1129 | 4815 | 2587 | 111   |
| H(18B) | 2603 | 5047 | 2741 | 111   |
| H(18C) | 1796 | 5142 | 3416 | 111   |
| H(11B) | 2969 | 4414 | 4899 | 47    |
| H(12B) | 3232 | 2244 | 4927 | 52    |
| H(14B) | 3710 | 4600 | 3712 | 51    |

SUPPORTING INFORMATION

---

|        |      |      |      |    |
|--------|------|------|------|----|
| H(16D) | 1877 | 2156 | 3403 | 88 |
| H(16E) | 2939 | 1331 | 3766 | 88 |
| H(16F) | 3034 | 1892 | 2973 | 88 |
| H(17C) | 1704 | 4897 | 2971 | 89 |
| H(17D) | 1521 | 4320 | 3744 | 89 |
| H(17E) | 1410 | 3636 | 2980 | 89 |
| H(18D) | 5112 | 2038 | 4319 | 57 |
| H(18E) | 5126 | 2408 | 3464 | 57 |

---

## SUPPORTING INFORMATION

Table S13. Torsion angles [°] for 3,5-dinitrobenzoylated derivative of **8a**.

|                          |             |
|--------------------------|-------------|
| C(1)-N(1)-N(2)-C(3)      | 0.4(3)      |
| C(4)-N(1)-N(2)-C(3)      | 169.3(2)    |
| N(2)-N(1)-C(1)-C(2)      | -1.1(3)     |
| C(4)-N(1)-C(1)-C(2)      | -169.2(2)   |
| N(1)-C(1)-C(2)-C(3)      | 1.2(3)      |
| N(1)-N(2)-C(3)-C(2)      | 0.4(4)      |
| C(1)-C(2)-C(3)-N(2)      | -1.1(4)     |
| C(1)-N(1)-C(4)-C(5)      | -111.5(3)   |
| N(2)-N(1)-C(4)-C(5)      | 81.3(3)     |
| C(1)-N(1)-C(4)-C(9)      | 66.7(3)     |
| N(2)-N(1)-C(4)-C(9)      | -100.5(3)   |
| C(9)-C(4)-C(5)-C(6)      | -2.0(3)     |
| N(1)-C(4)-C(5)-C(6)      | 176.07(19)  |
| C(9)-C(4)-C(5)-C(10)     | 179.3(2)    |
| N(1)-C(4)-C(5)-C(10)     | -2.6(3)     |
| C(4)-C(5)-C(6)-C(7)      | -0.7(3)     |
| C(10)-C(5)-C(6)-C(7)     | 178.0(2)    |
| C(5)-C(6)-C(7)-C(8)      | 1.7(3)      |
| C(6)-C(7)-C(8)-C(9)      | 0.1(3)      |
| C(7)-C(8)-C(9)-C(4)      | -2.7(3)     |
| C(7)-C(8)-C(9)-C(11A)    | 166.0(3)    |
| C(7)-C(8)-C(9)-C(11B)    | -173.9(3)   |
| C(5)-C(4)-C(9)-C(8)      | 3.7(3)      |
| N(1)-C(4)-C(9)-C(8)      | -174.41(19) |
| C(5)-C(4)-C(9)-C(11A)    | -167.0(2)   |
| N(1)-C(4)-C(9)-C(11A)    | 14.9(3)     |
| C(5)-C(4)-C(9)-C(11B)    | 171.5(4)    |
| N(1)-C(4)-C(9)-C(11B)    | -6.5(5)     |
| C(25)-C(20)-C(21)-C(22)  | -1.1(4)     |
| C(15A)-C(20)-C(21)-C(22) | -171.9(4)   |
| C(15B)-C(20)-C(21)-C(22) | 166.0(3)    |
| C(20)-C(21)-C(22)-C(23)  | 2.4(3)      |
| C(20)-C(21)-C(22)-N(4)   | -176.6(2)   |
| O(4)-N(4)-C(22)-C(23)    | -178.18(19) |
| O(3)-N(4)-C(22)-C(23)    | 1.5(3)      |
| O(4)-N(4)-C(22)-C(21)    | 0.8(3)      |

## SUPPORTING INFORMATION

---

|                             |             |
|-----------------------------|-------------|
| O(3)-N(4)-C(22)-C(21)       | -179.52(19) |
| C(21)-C(22)-C(23)-C(24)     | -1.6(3)     |
| N(4)-C(22)-C(23)-C(24)      | 177.35(18)  |
| C(22)-C(23)-C(24)-C(25)     | -0.5(3)     |
| C(22)-C(23)-C(24)-N(3)      | -178.65(18) |
| O(2)-N(3)-C(24)-C(25)       | -179.24(19) |
| O(1)-N(3)-C(24)-C(25)       | -1.2(3)     |
| O(2)-N(3)-C(24)-C(23)       | -1.0(3)     |
| O(1)-N(3)-C(24)-C(23)       | 177.09(19)  |
| C(21)-C(20)-C(25)-C(24)     | -0.8(4)     |
| C(15A)-C(20)-C(25)-C(24)    | 171.2(3)    |
| C(15B)-C(20)-C(25)-C(24)    | -166.5(3)   |
| C(23)-C(24)-C(25)-C(20)     | 1.6(3)      |
| N(3)-C(24)-C(25)-C(20)      | 179.8(2)    |
| C(8)-C(9)-C(11A)-C(12A)     | 25.7(5)     |
| C(4)-C(9)-C(11A)-C(12A)     | -165.1(3)   |
| C(9)-C(11A)-C(12A)-C(13A)   | -179.9(4)   |
| C(11A)-C(12A)-C(13A)-C(14A) | -110.5(5)   |
| C(11A)-C(12A)-C(13A)-C(16A) | 9.9(8)      |
| C(11A)-C(12A)-C(13A)-C(17A) | 128.8(5)    |
| C(15A)-O(5A)-C(14A)-C(13A)  | 139.6(5)    |
| C(15A)-O(5A)-C(14A)-C(19)   | -98.2(5)    |
| C(12A)-C(13A)-C(14A)-O(5A)  | -171.7(4)   |
| C(16A)-C(13A)-C(14A)-O(5A)  | 65.4(5)     |
| C(17A)-C(13A)-C(14A)-O(5A)  | -53.0(6)    |
| C(12A)-C(13A)-C(14A)-C(19)  | 71.1(5)     |
| C(16A)-C(13A)-C(14A)-C(19)  | -51.8(5)    |
| C(17A)-C(13A)-C(14A)-C(19)  | -170.2(4)   |
| C(14A)-O(5A)-C(15A)-O(6A)   | -0.7(9)     |
| C(14A)-O(5A)-C(15A)-C(20)   | -174.5(4)   |
| C(25)-C(20)-C(15A)-O(6A)    | 29.5(7)     |
| C(21)-C(20)-C(15A)-O(6A)    | -159.0(5)   |
| C(25)-C(20)-C(15A)-O(5A)    | -156.4(4)   |
| C(21)-C(20)-C(15A)-O(5A)    | 15.0(6)     |
| C(14A)-C(13A)-C(17A)-C(18A) | -47.3(7)    |
| C(12A)-C(13A)-C(17A)-C(18A) | 71.3(6)     |
| C(16A)-C(13A)-C(17A)-C(18A) | -166.5(5)   |
| C(8)-C(9)-C(11B)-C(12B)     | -146.2(5)   |

SUPPORTING INFORMATION

---

|                             |           |
|-----------------------------|-----------|
| C(4)-C(9)-C(11B)-C(12B)     | 44.9(7)   |
| C(9)-C(11B)-C(12B)-C(13B)   | 175.6(5)  |
| C(11B)-C(12B)-C(13B)-C(16B) | -134.8(7) |
| C(11B)-C(12B)-C(13B)-C(18B) | 109.8(7)  |
| C(11B)-C(12B)-C(13B)-C(14B) | -9.9(9)   |
| C(15B)-O(5B)-C(14B)-C(17B)  | 104.0(6)  |
| C(15B)-O(5B)-C(14B)-C(13B)  | -137.4(5) |
| C(16B)-C(13B)-C(14B)-O(5B)  | -62.9(6)  |
| C(12B)-C(13B)-C(14B)-O(5B)  | 174.1(5)  |
| C(18B)-C(13B)-C(14B)-O(5B)  | 56.8(6)   |
| C(16B)-C(13B)-C(14B)-C(17B) | 54.8(7)   |
| C(12B)-C(13B)-C(14B)-C(17B) | -68.2(7)  |
| C(18B)-C(13B)-C(14B)-C(17B) | 174.6(5)  |
| C(14B)-O(5B)-C(15B)-O(6B)   | -1.9(10)  |
| C(14B)-O(5B)-C(15B)-C(20)   | 169.9(4)  |
| C(25)-C(20)-C(15B)-O(6B)    | -3.8(9)   |
| C(21)-C(20)-C(15B)-O(6B)    | -170.3(7) |
| C(25)-C(20)-C(15B)-O(5B)    | -176.1(4) |
| C(21)-C(20)-C(15B)-O(5B)    | 17.4(6)   |
| C(16B)-C(13B)-C(18B)-C(19)  | 170.0(5)  |
| C(12B)-C(13B)-C(18B)-C(19)  | -75.3(6)  |
| C(14B)-C(13B)-C(18B)-C(19)  | 48.4(6)   |

---

Symmetry transformations used to generate equivalent atoms:

## SUPPORTING INFORMATION

## VIII. Author Contributions

S.D. and Z.S. co-conceived the concept, developed the reaction conditions, completed the scope and mechanistic experiments and co-wrote the original draft. J.A.E. co-conceived the concept, co-wrote the manuscript with feedback from S.D. and Z.S., and acquired funding for the project.

## IX. References

- [1] K.-I. Fujita, Y. Takahashi, M. Owaki, K. Yamamoto, R. Yamaguchi, *Org. Lett.* **2004**, *6*, 2785-2788.
- [2] J. R. Hummel, J. A. Ellman, *J. Am. Chem. Soc.* **2015**, *137*, 490-498.
- [3] T. Yoshino, H. Ikemoto, S. Matsunaga, M. Kanai, *Angew. Chem., Int. Ed.* **2013**, *52*, 2207-2211.
- [4] J. A. Boerth, J. A. Ellman, *Angew. Chem., Int. Ed.* **2017**, *56*, 9976-9980.
- [5] Y. Park, K. T. Park, J. G. Kim, S. Chang, *J. Am. Chem. Soc.* **2015**, *137*, 4534-4542.
- [6] P. M. Liu, C. G. Frost, *Org. Lett.* **2013**, *15*, 5862-5865.
- [7] C. Liu, W. Yang, *Chem. Commun.* **2009**, *41*, 6267-6269.
- [8] K. D. Hesp, R. G. Bergman, J. A. Ellman, *Org. Lett.* **2012**, *14*, 2304-2307.
- [9] T. Stopka, P. Alder, G. Hagn, H. Zhang, V. Tona, N. Maulide, *Synthesis*, **2019**, *51*, 194-202.
- [10] P. C. Too, G. H. Chan, Y. L. Tnay, H. Hirao, S. Chiba, *Angew. Chem., Int. Ed.* **2016**, *55*, 3719-3723.
- [11] H. Ryu, J. Seo, H. M. Ko, *J. Org. Chem.* **2018**, *83*, 14102-14109.
- [12] A. Sen, A. Singh, A. M. Sieburth, *J. Org. Chem.* **2009**, *74*, 2884-2886.
- [13] S. Fustero, P. Bello, J. Miró, A. Simón, C. del Pozo, *Chem. Eur. J.* **2012**, *18*, 10991-10997.
- [14] A. S. Kende, J. S. Mendoza, Y. Fujii, *Tetrahedron* **1993**, *49*, 8015-8038.
- [15] Y. Liu, S. Duan, R. Zhang, Y. Liu, J. Chen, W. Xiao, *Org. Biomol. Chem.* **2016**, *23*, 5224-5228.
- [16] I. Takayoshi, T. Jiro, T. Hideo, *Bull. Chem. Soc. Jpn.* **2009**, *82*, 475-481.
- [17] H. Leicht, I. Göttker-Schnetmann, S. Mecking, *J. Am. Chem. Soc.* **2017**, *139*, 6823-6826.
- [18] W. L. F. Armarego, C. Chai, in *Purification of Laboratory Chemicals* (6<sup>th</sup> edition), Butterworth-Heinemann, **2009**, pp. 154.
- [19] J. Thongpaen, T. E. Schmid, L. Toupet, V. Dorcet, M. Mauduit, O. Basle, *Chem. Commun.* **2018**, *59*, 8202-8205.
- [20] M. H. Shaw, R. A. Croft, W. G. Whittingham, J. F. Bower, *J. Am. Chem. Soc.* **2015**, *137*, 8054-8057.
- [21] J. J. Gajewski, K. B. Peterson, J. R. Kagel, Y. C. J. Huang, *J. Am. Chem. Soc.* **1989**, *111*, 9078-9081.

## SUPPORTING INFORMATION

## X. NMR Spectra

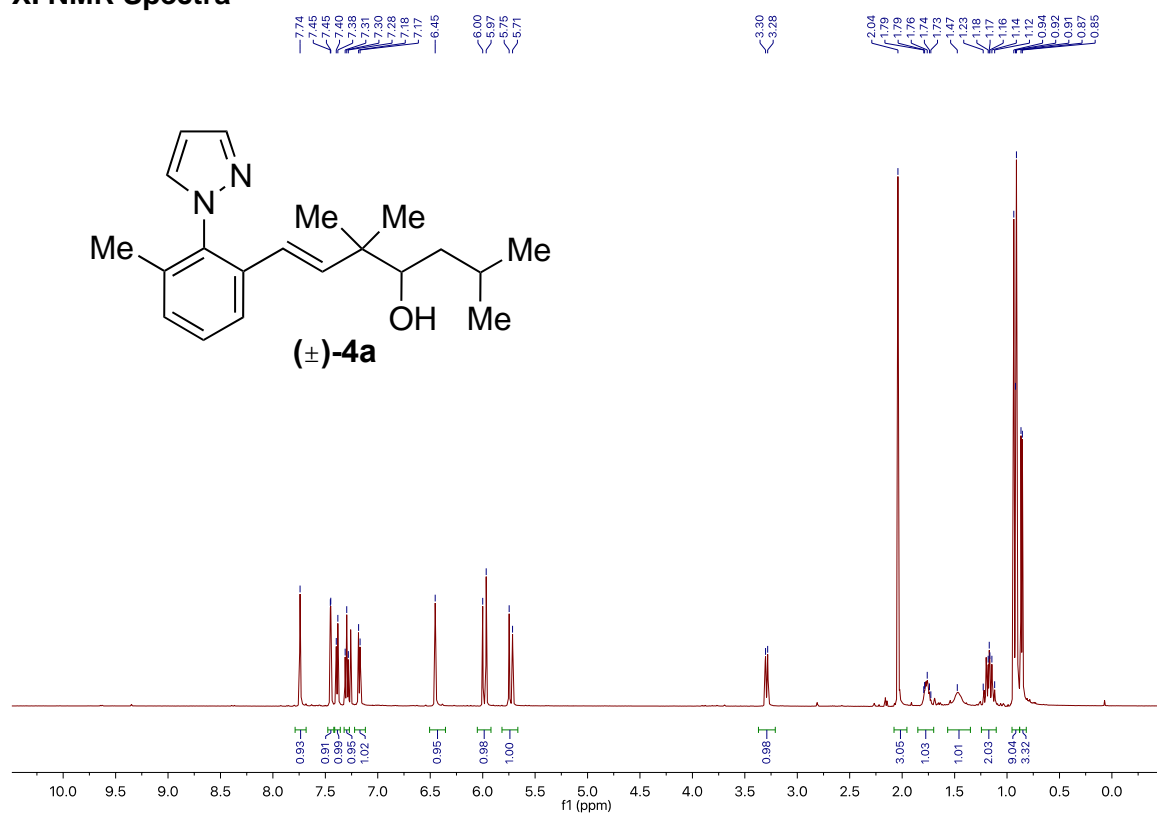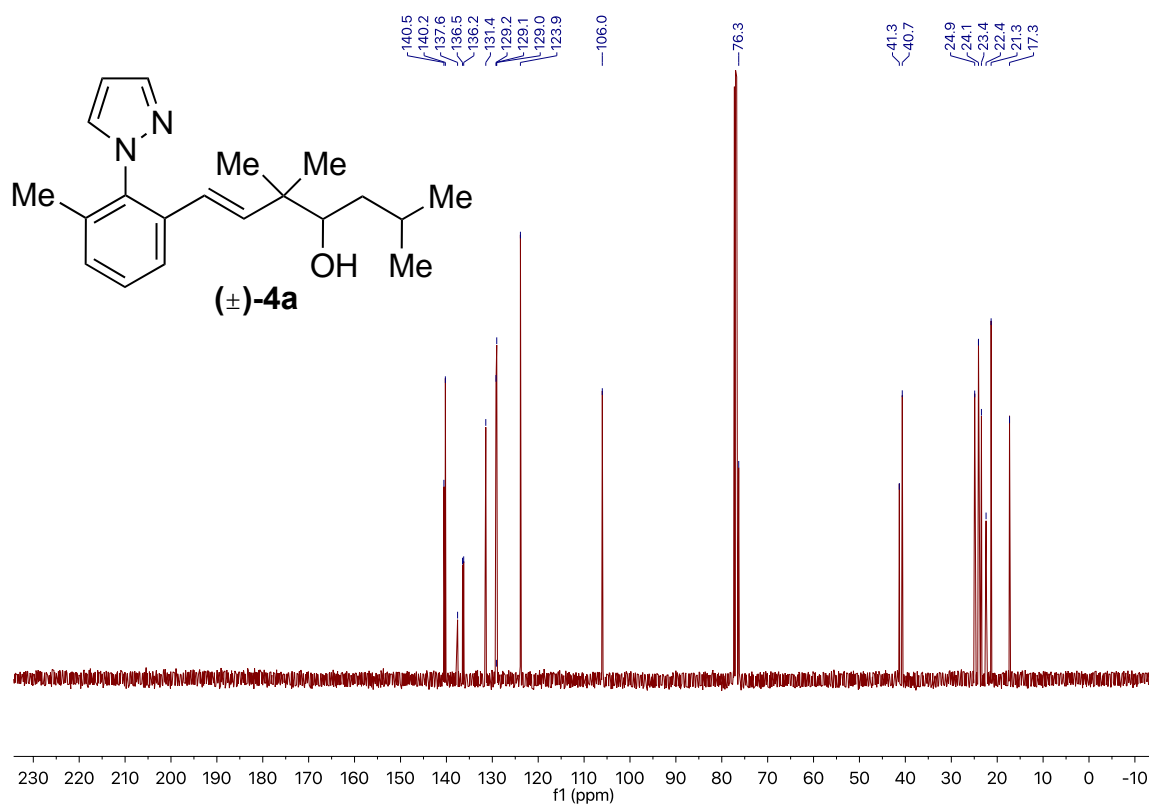



## SUPPORTING INFORMATION

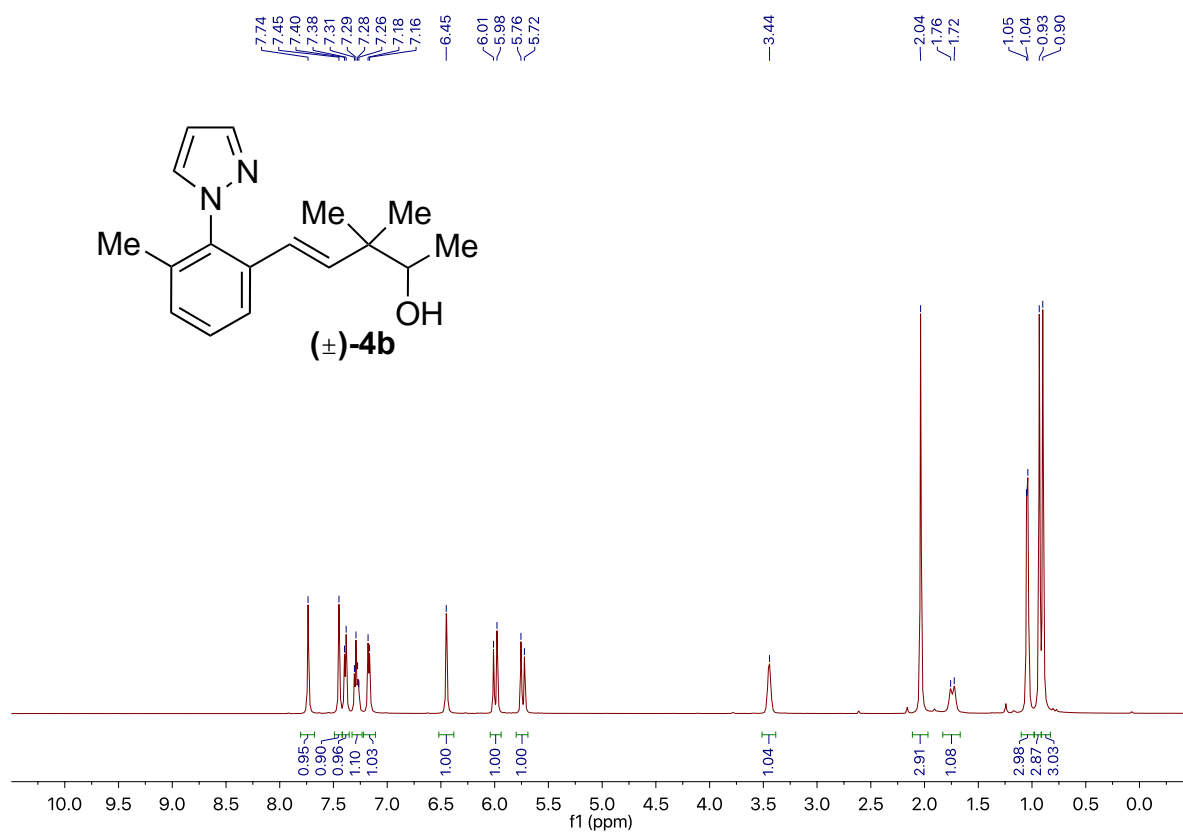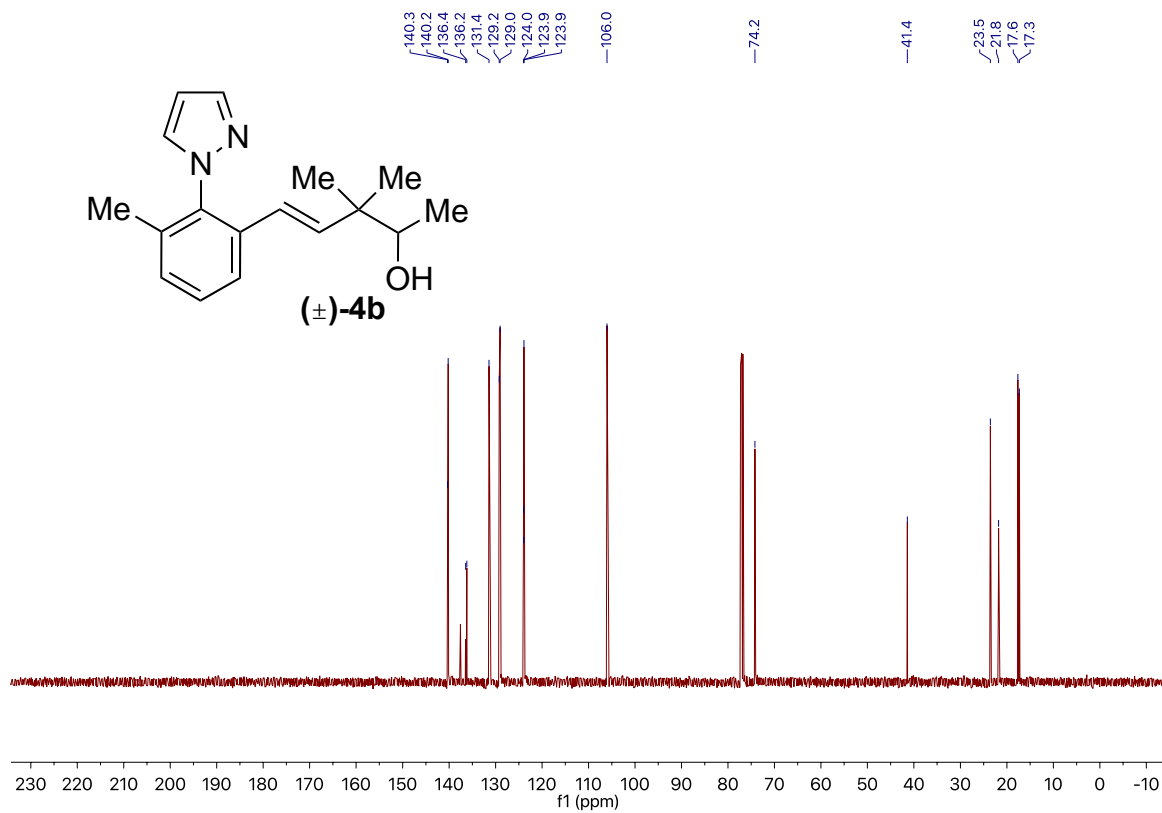

## SUPPORTING INFORMATION

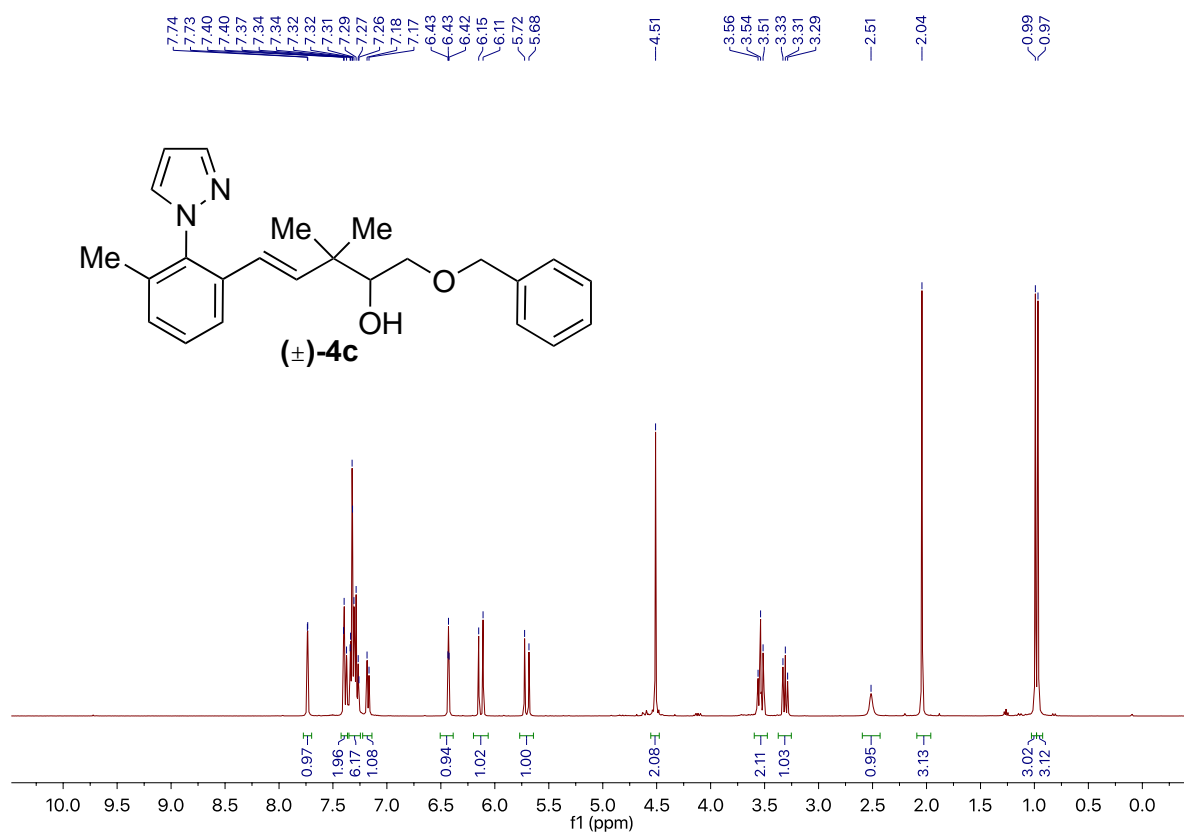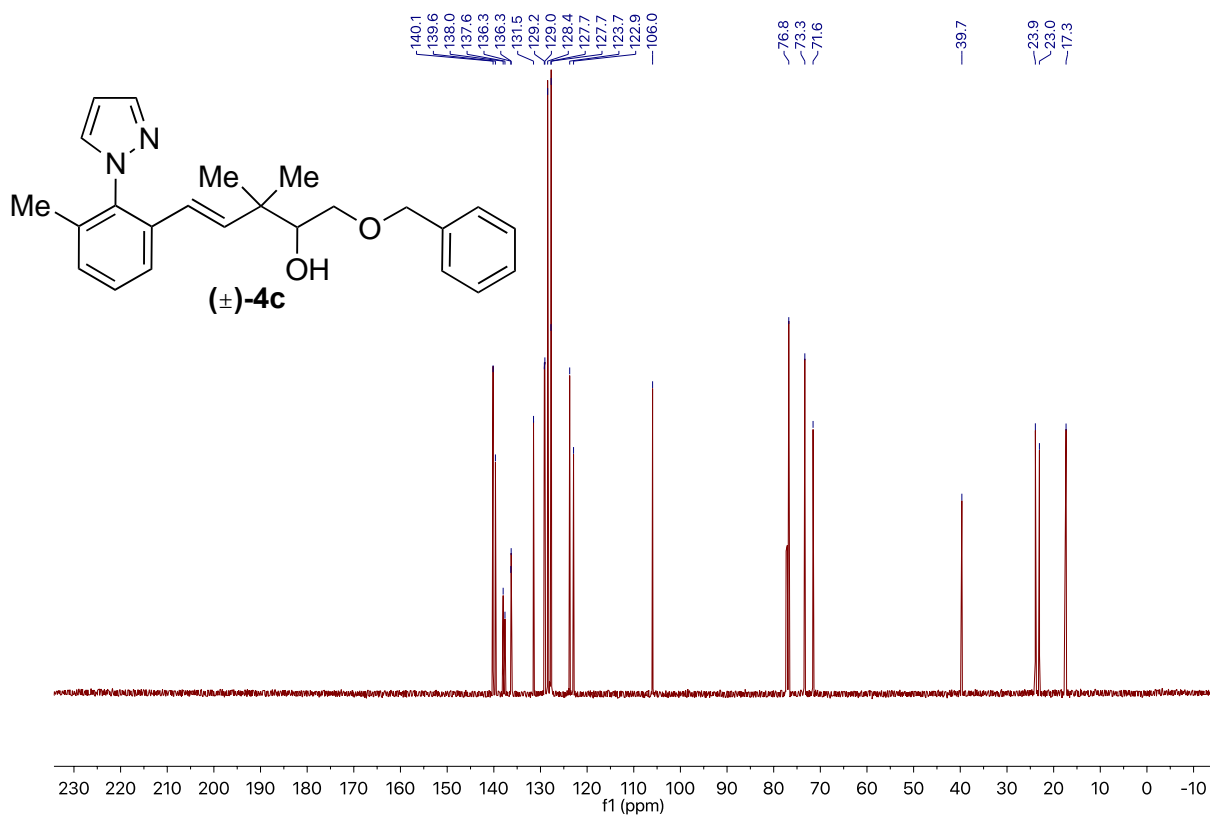



## SUPPORTING INFORMATION

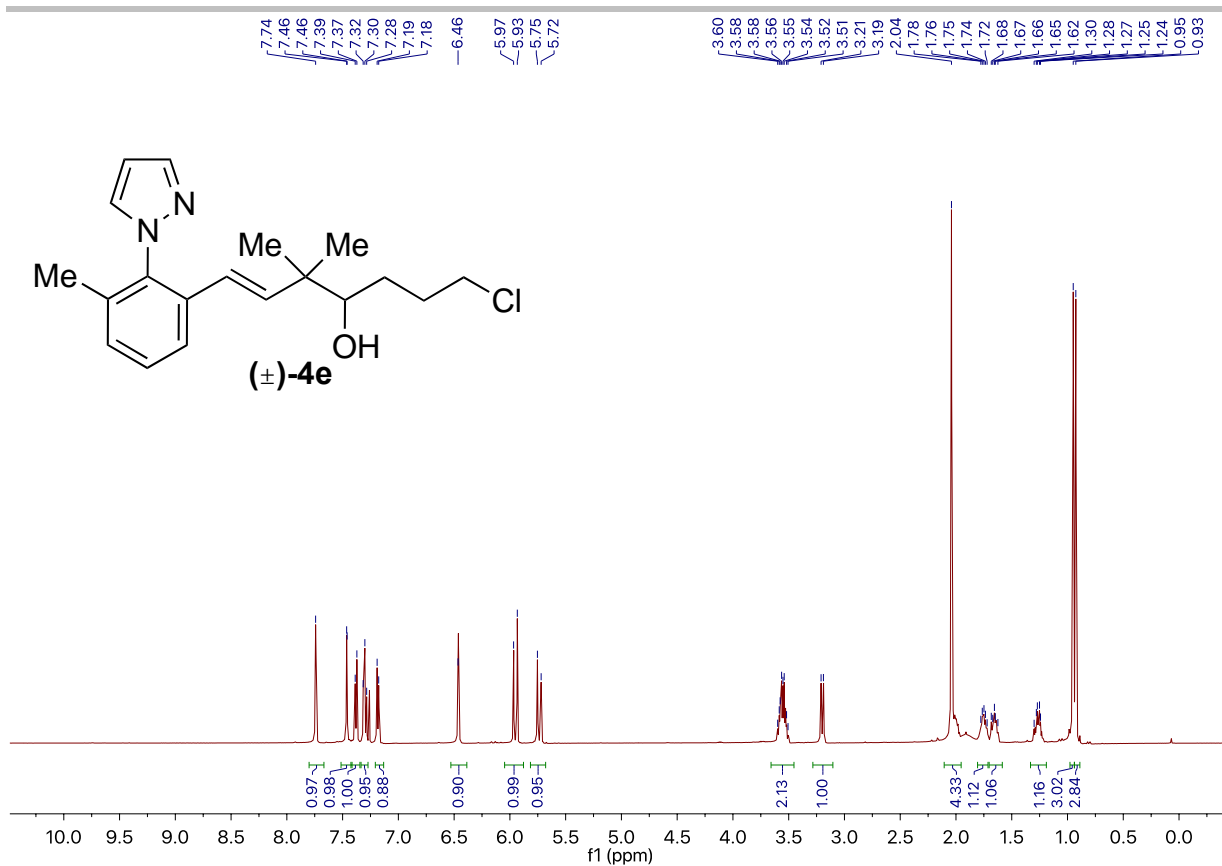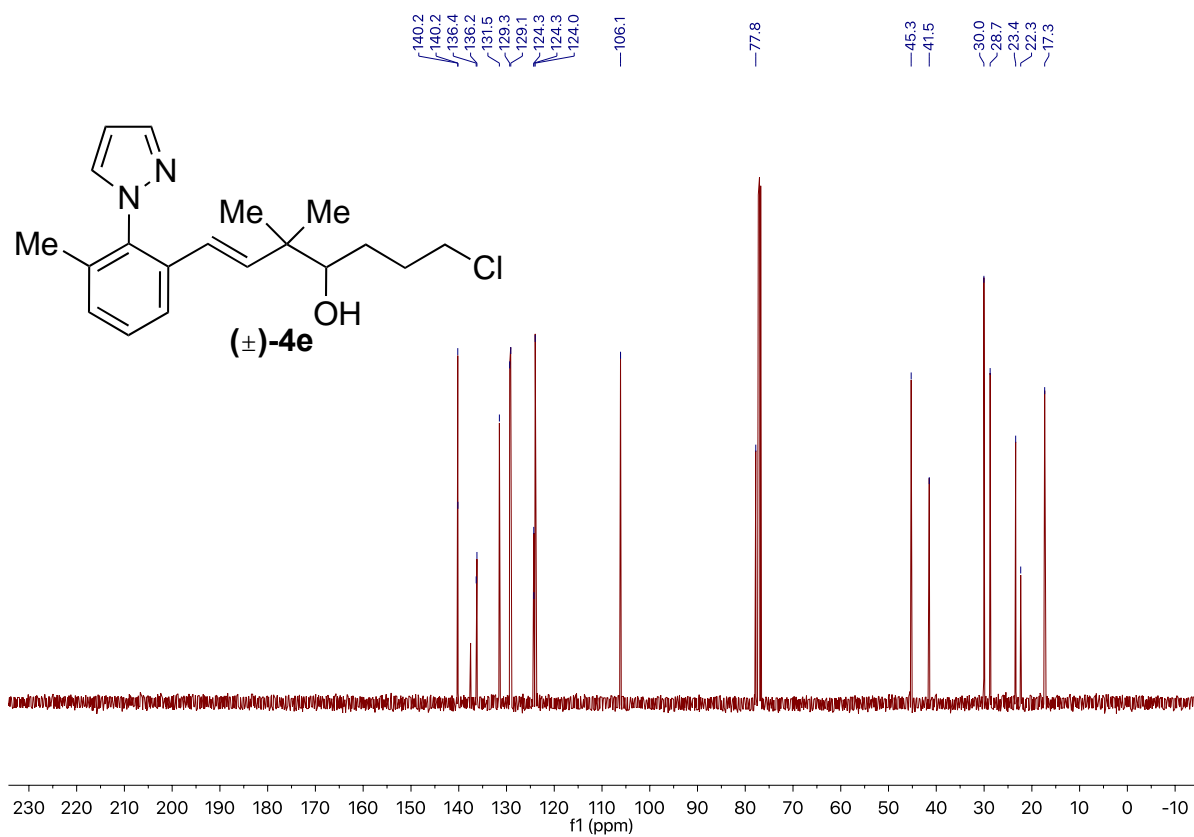

## SUPPORTING INFORMATION

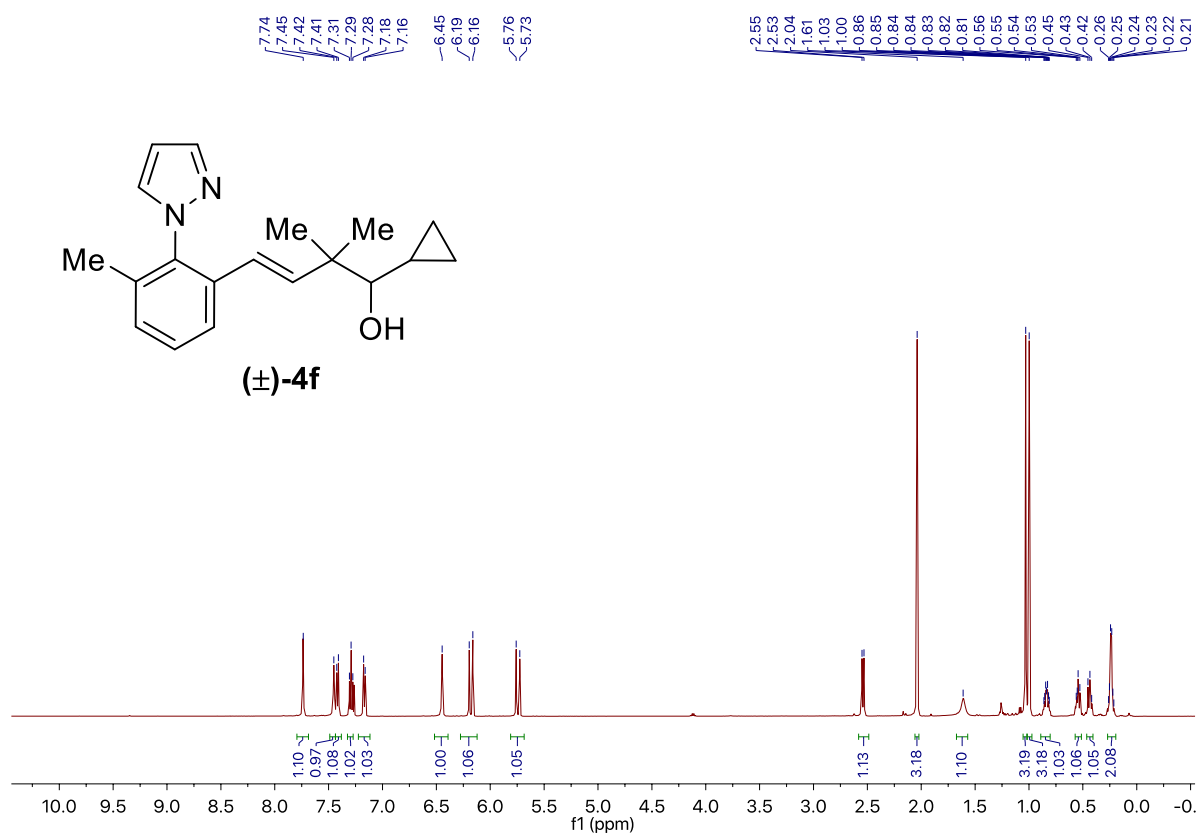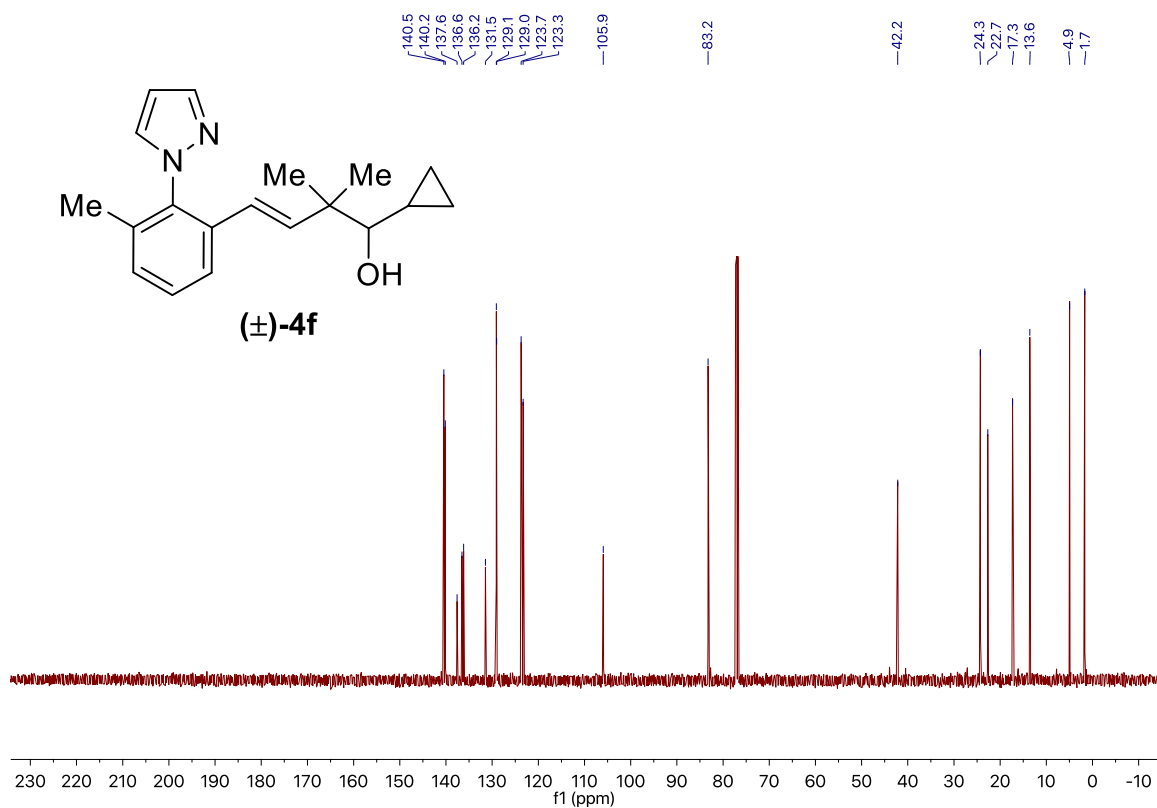

## SUPPORTING INFORMATION

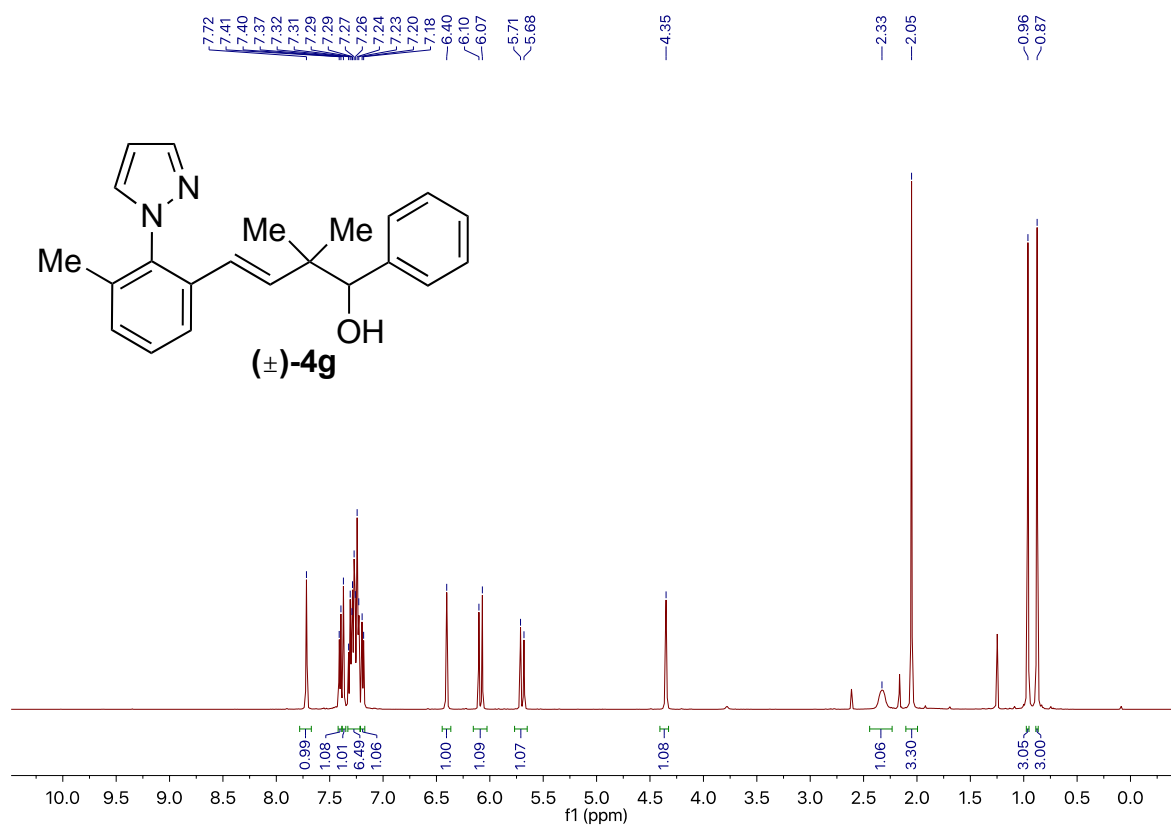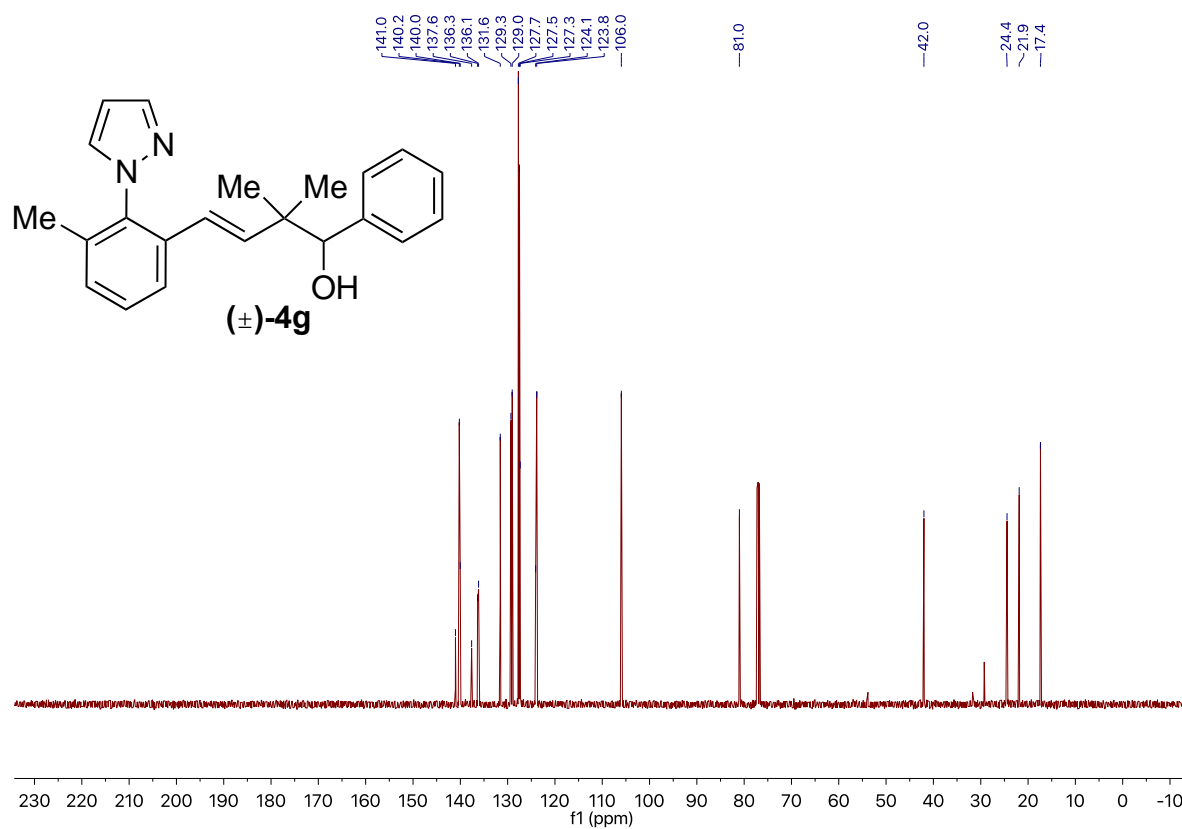



## SUPPORTING INFORMATION

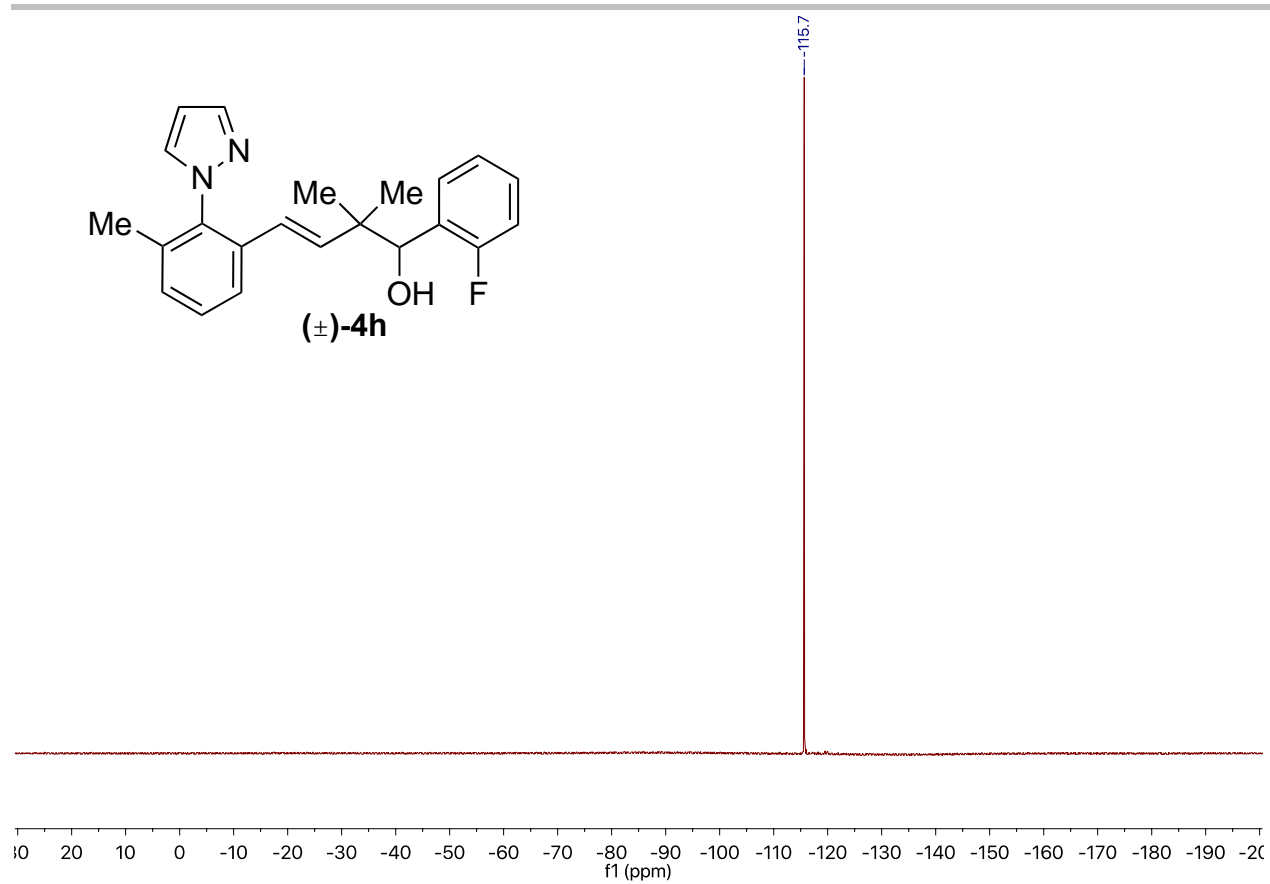



## SUPPORTING INFORMATION

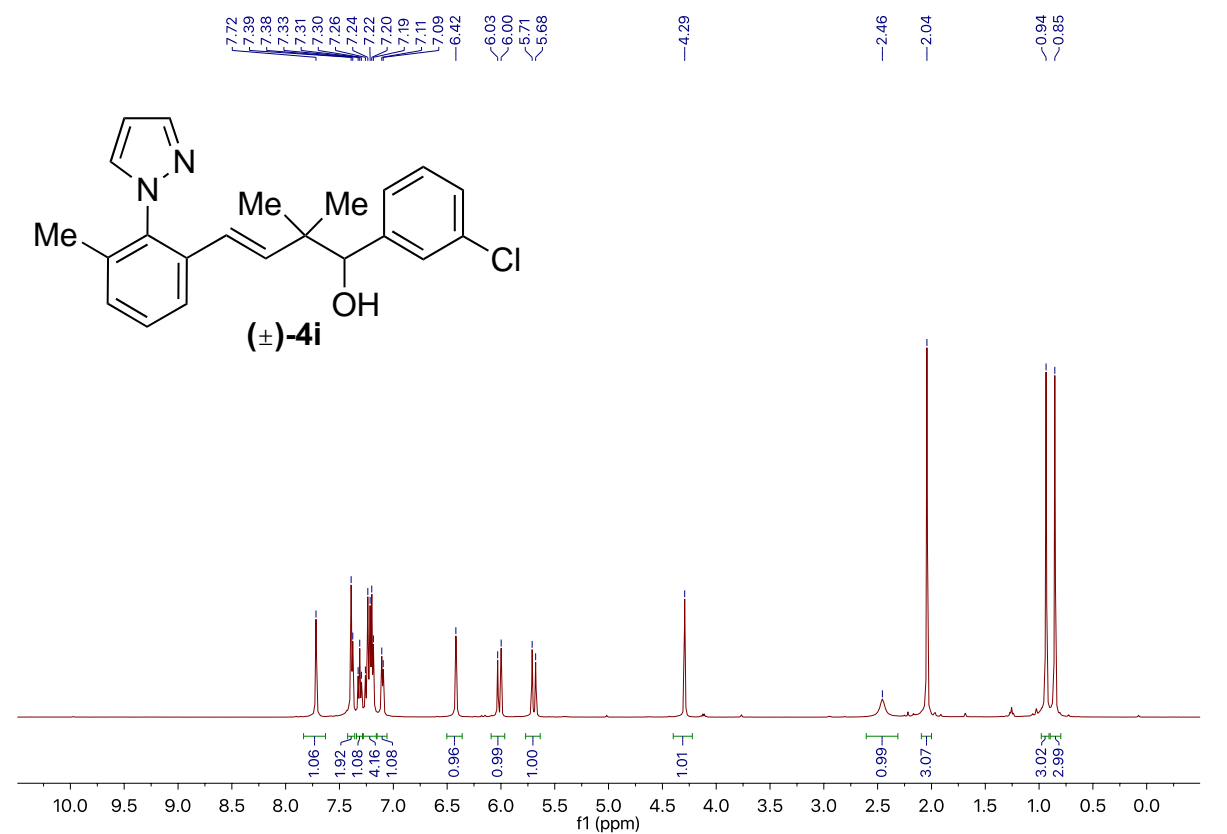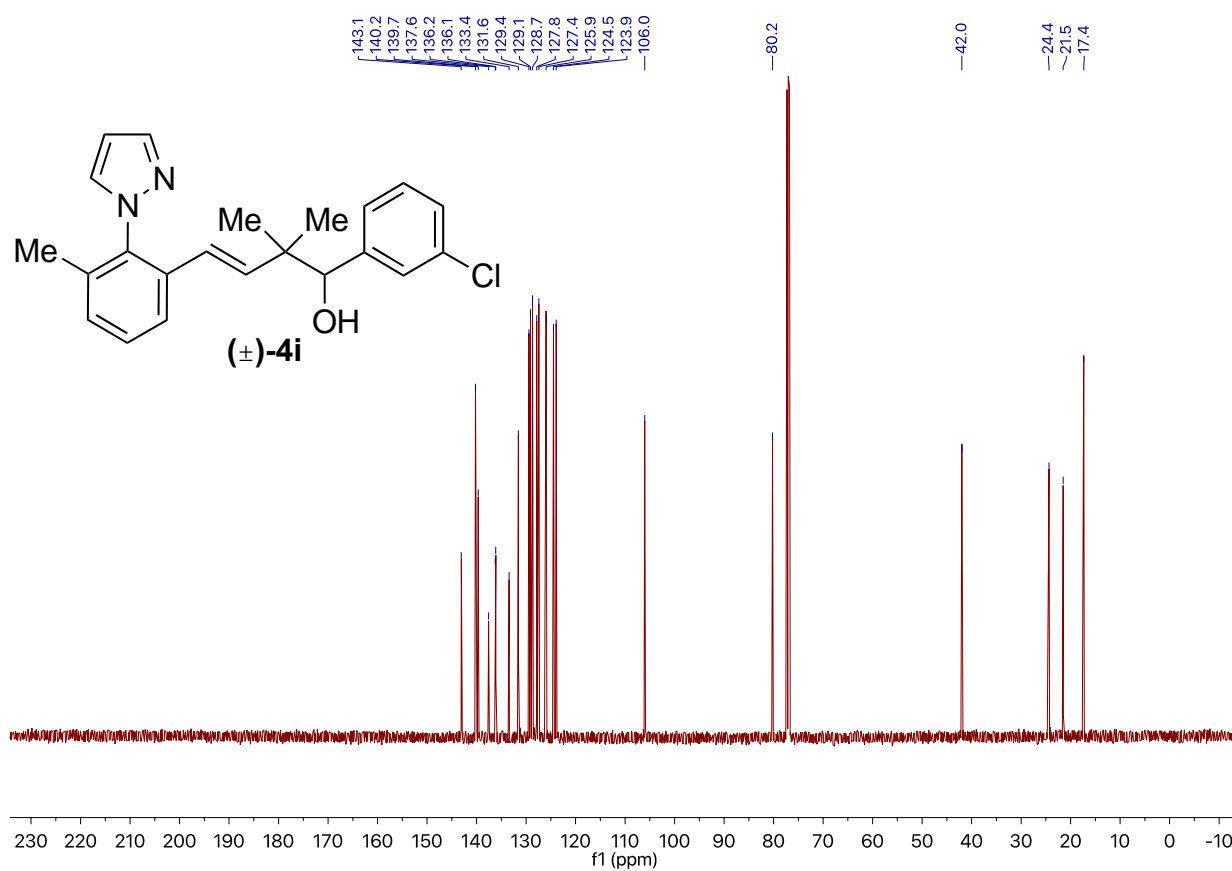

## SUPPORTING INFORMATION

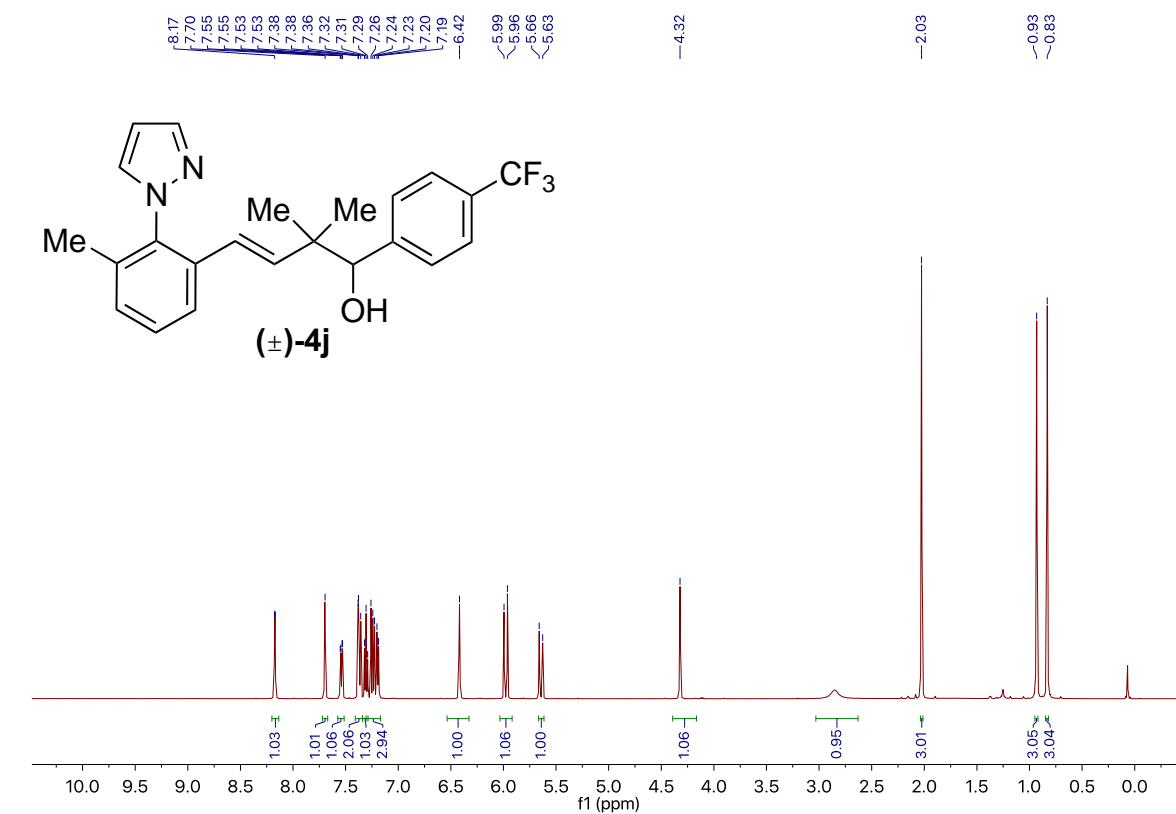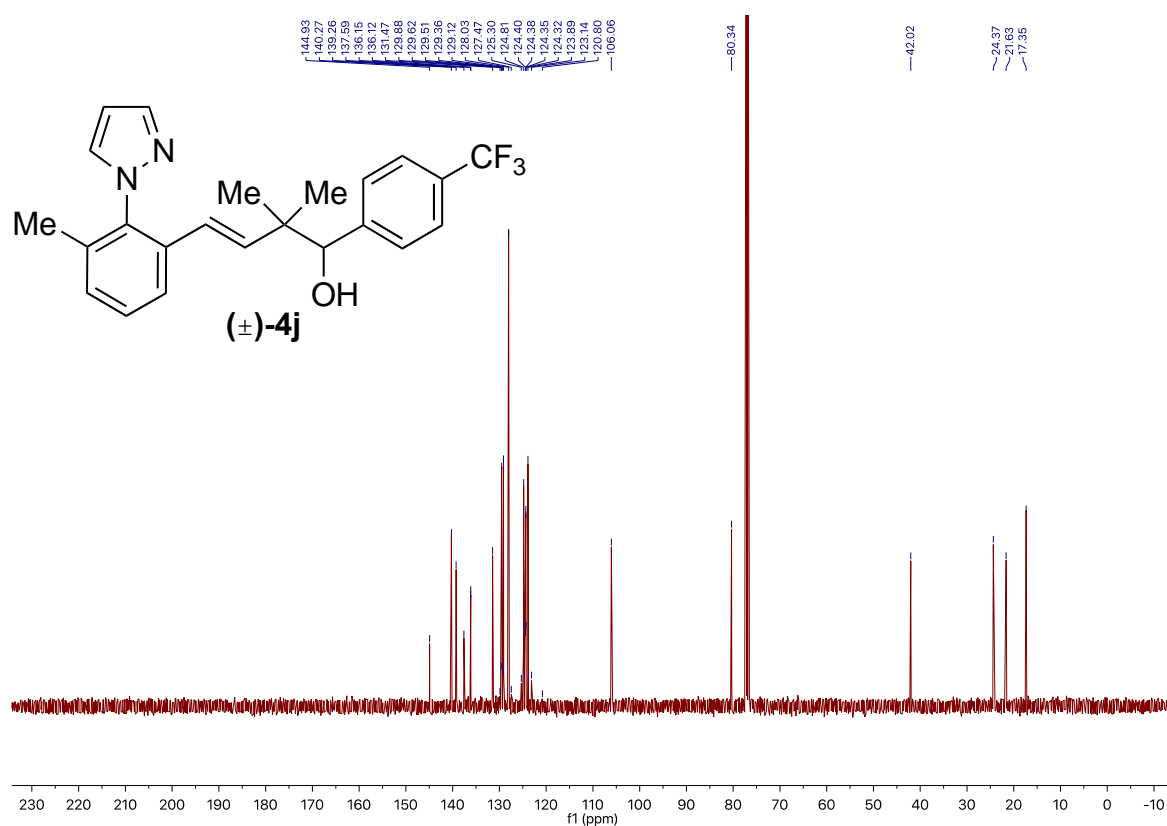

## SUPPORTING INFORMATION

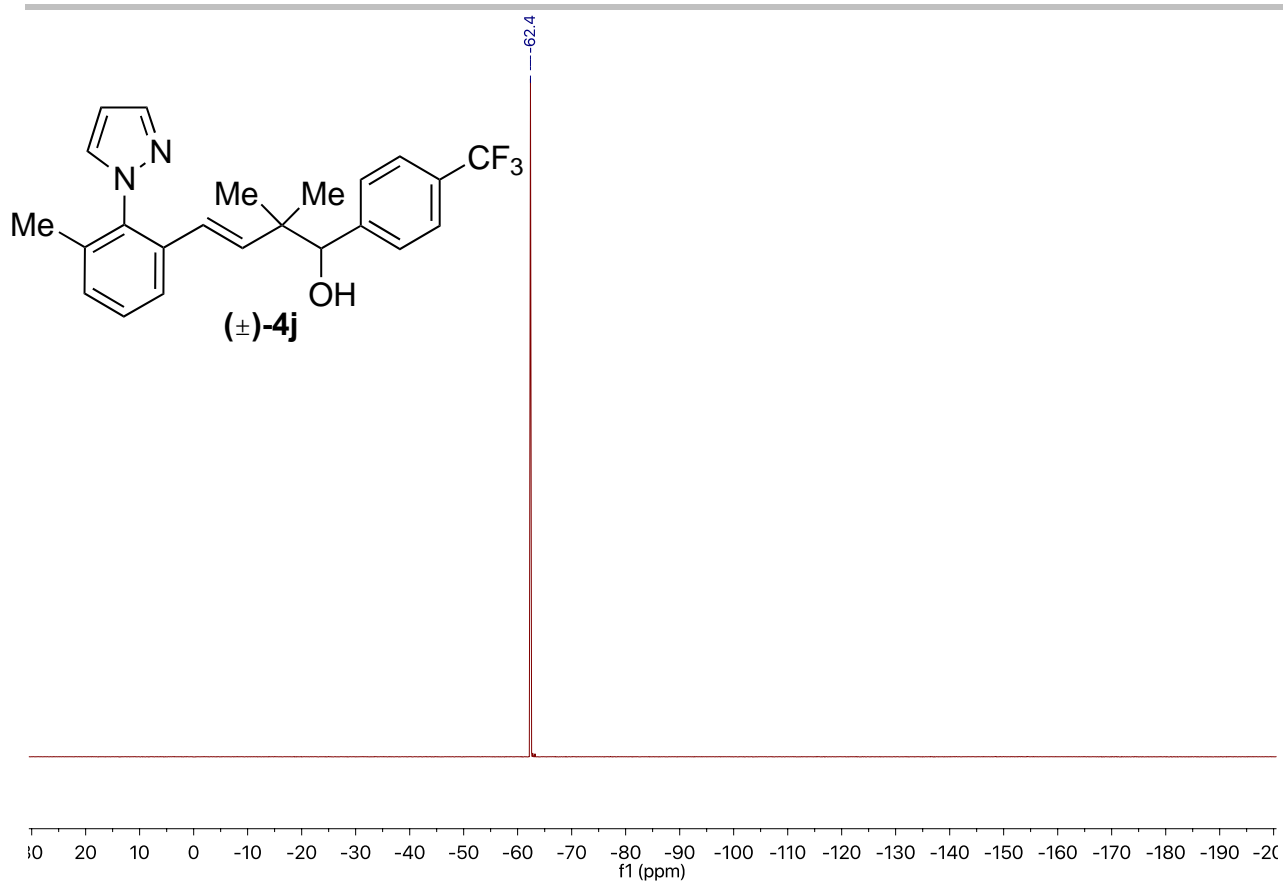

## SUPPORTING INFORMATION

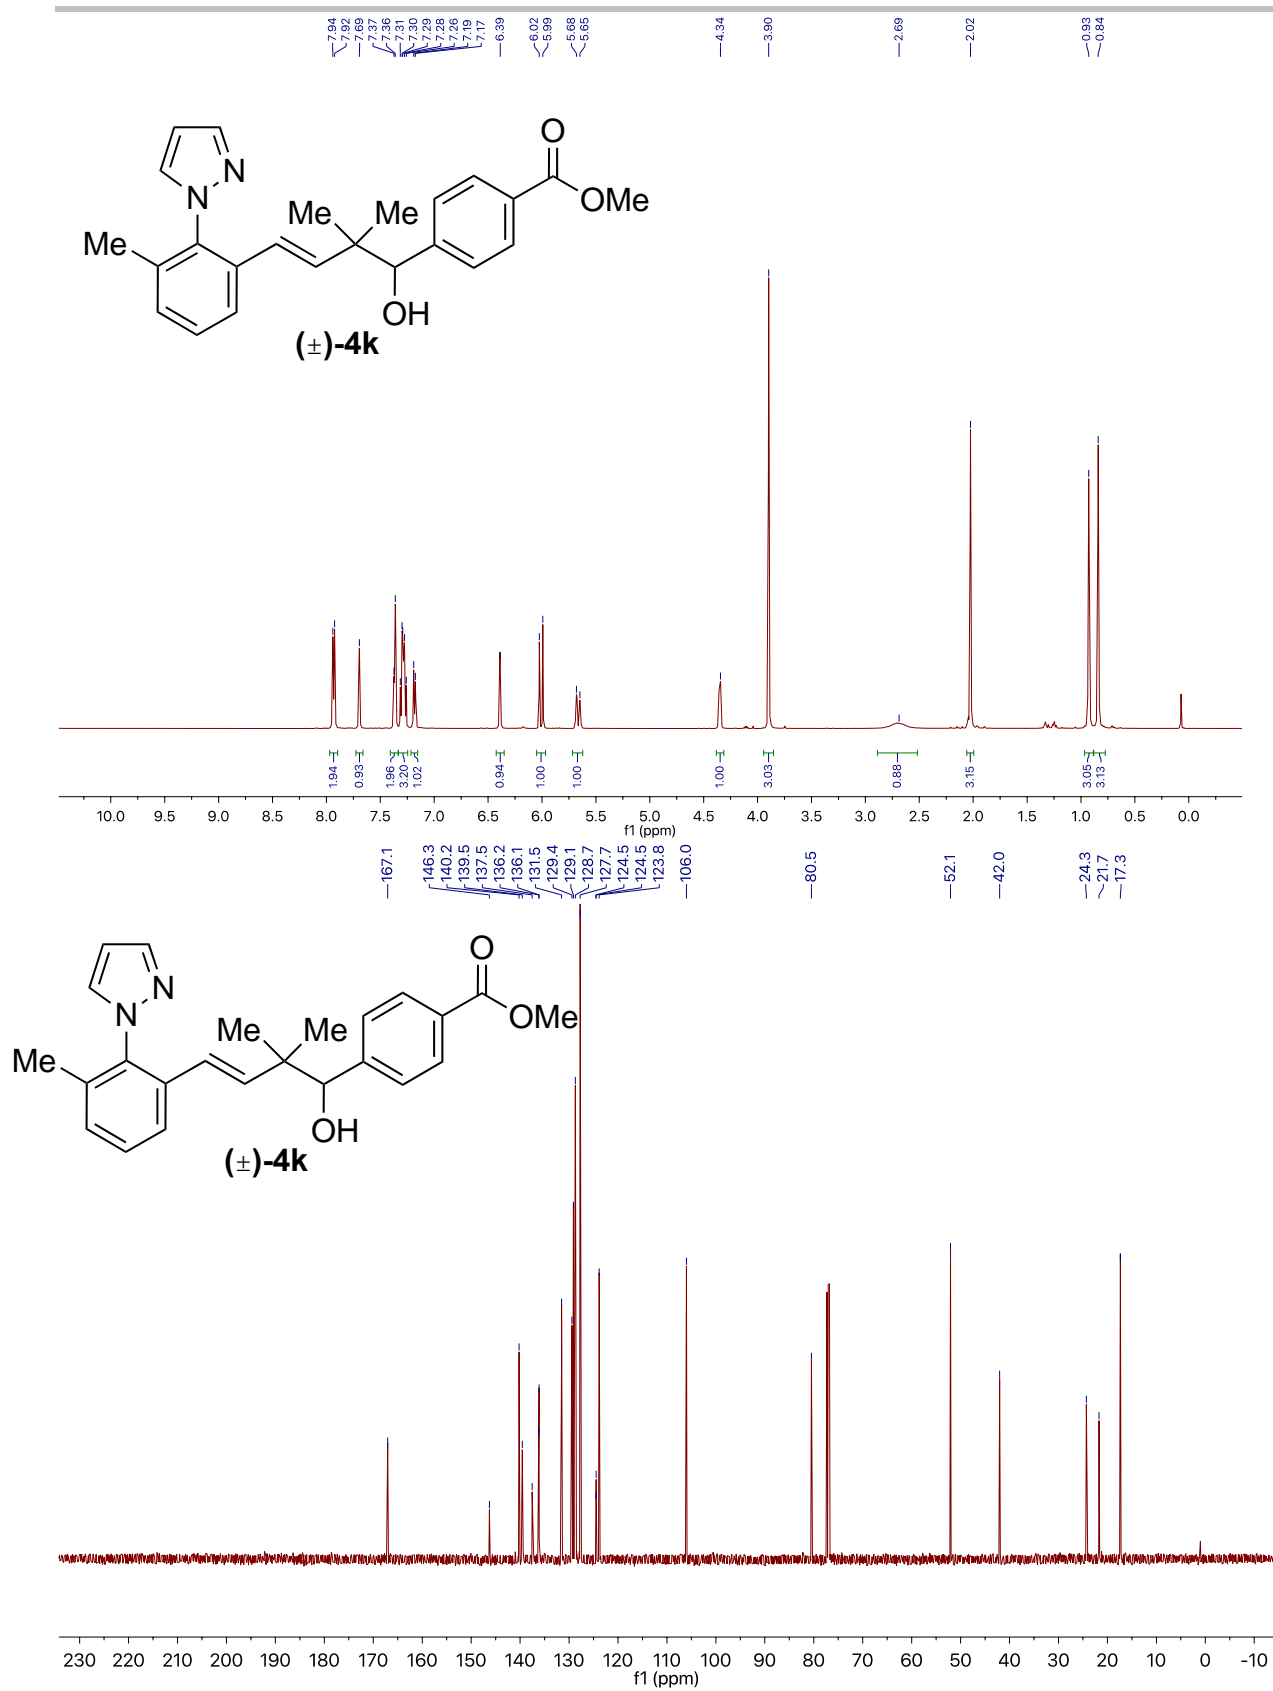

## SUPPORTING INFORMATION

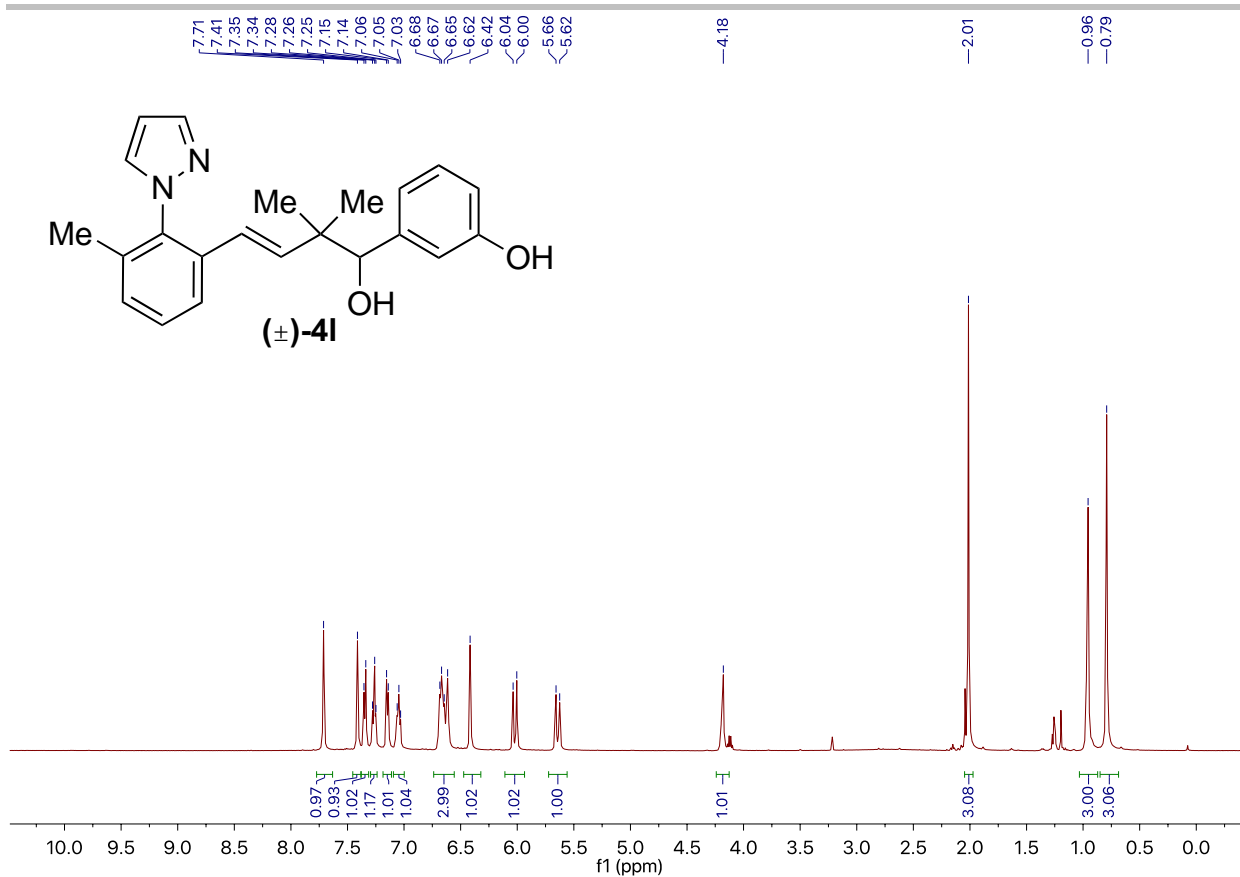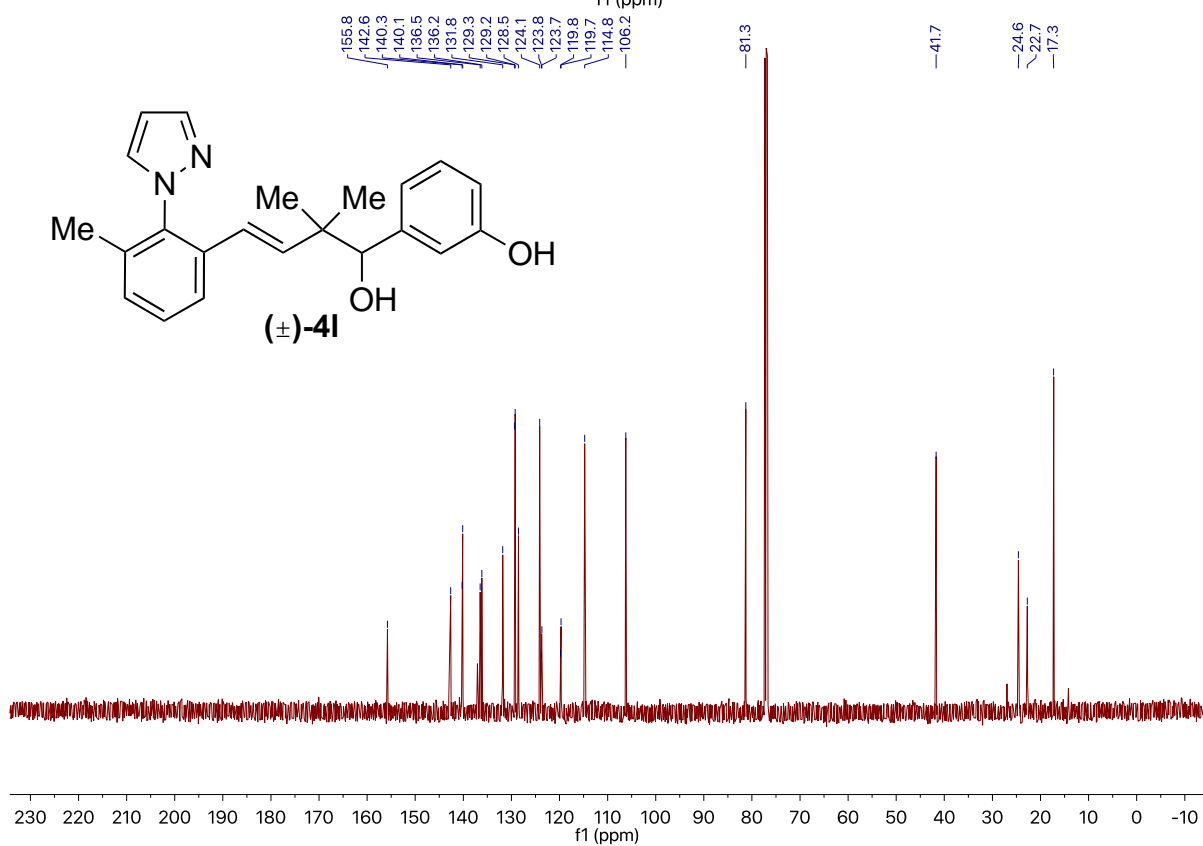

## SUPPORTING INFORMATION

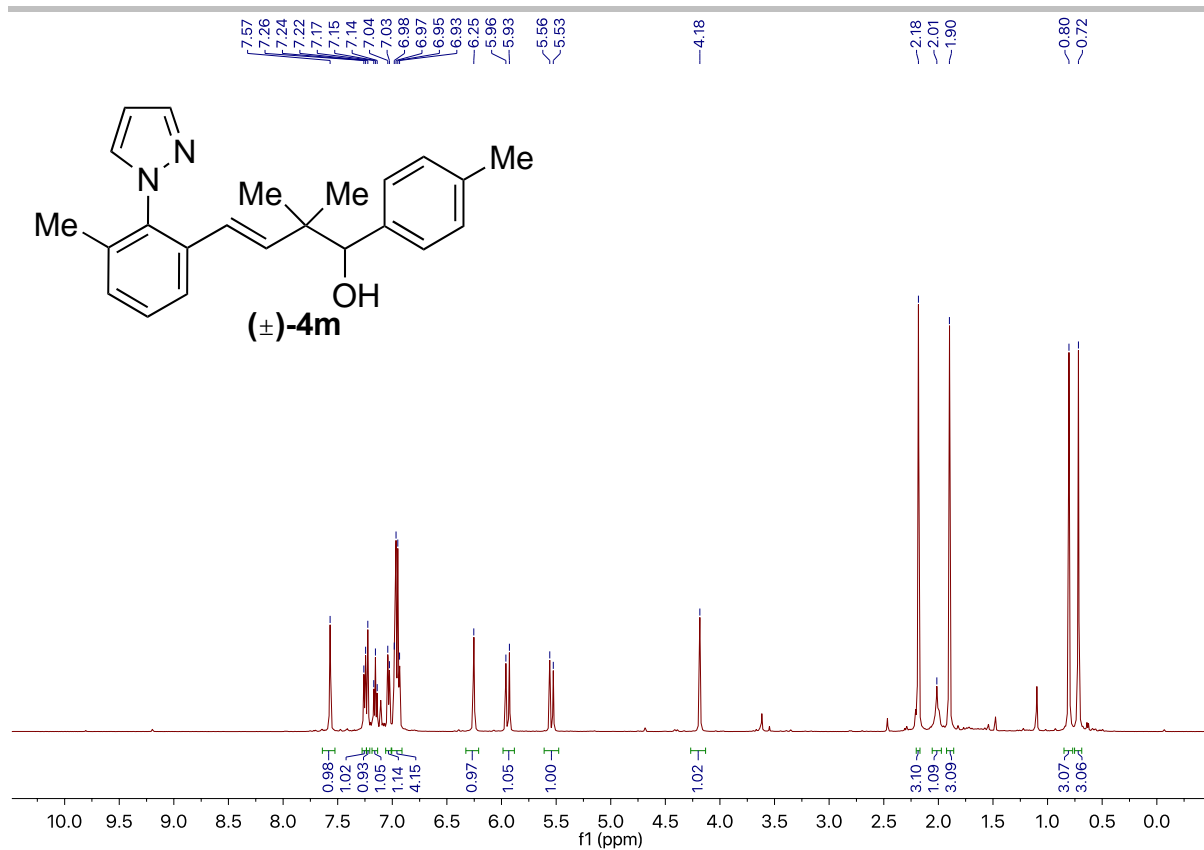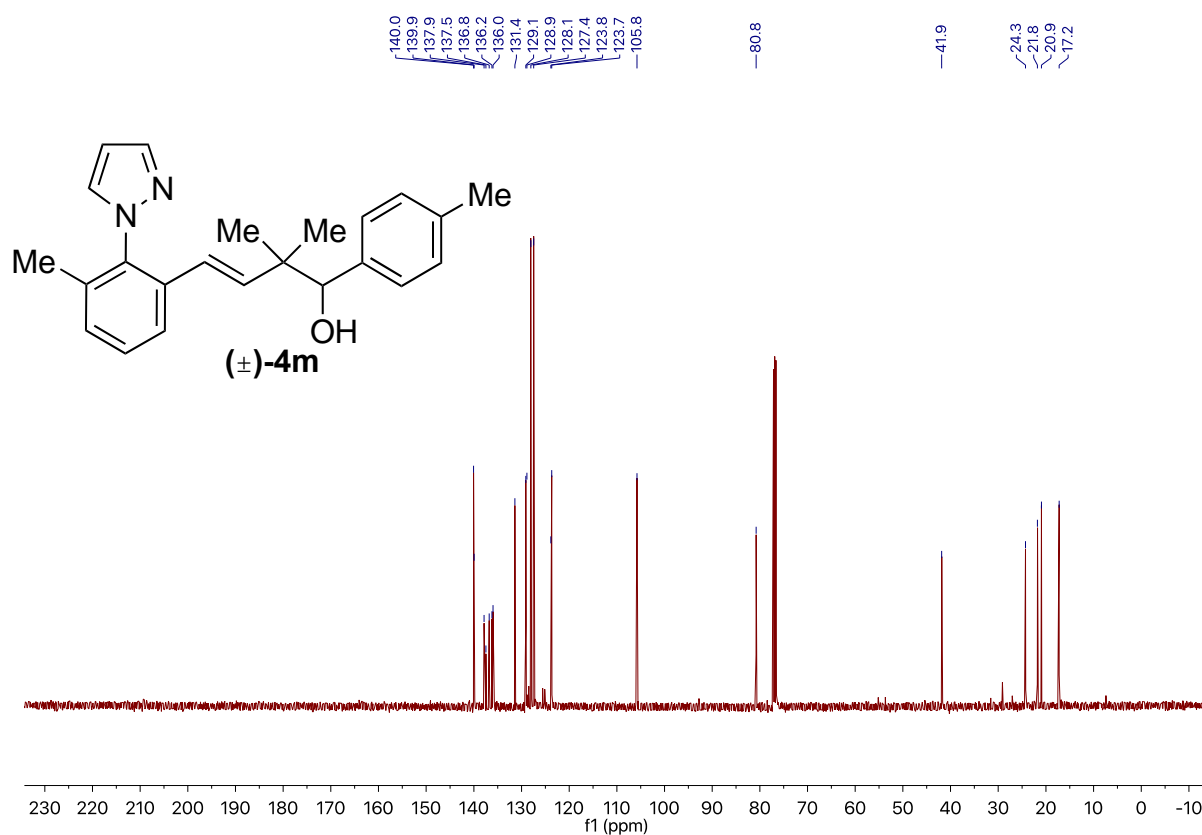

## SUPPORTING INFORMATION

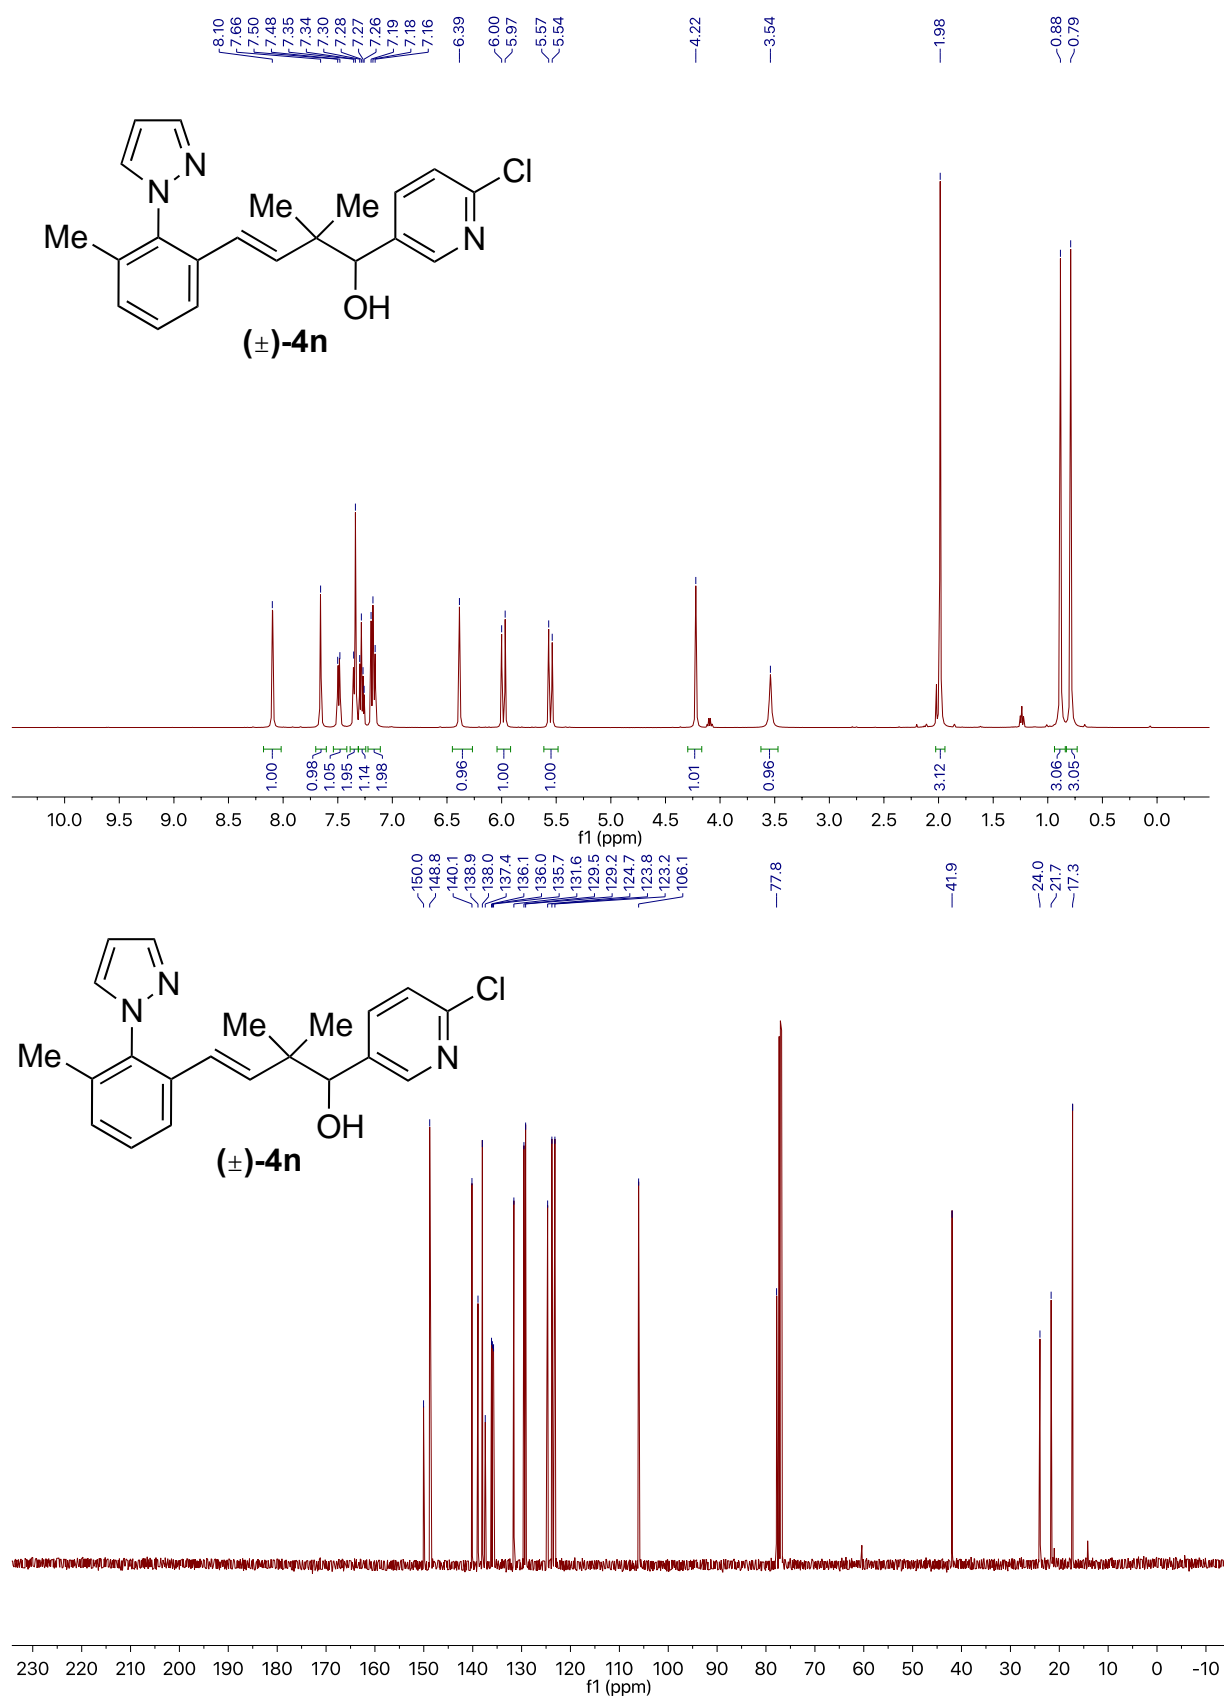

## SUPPORTING INFORMATION

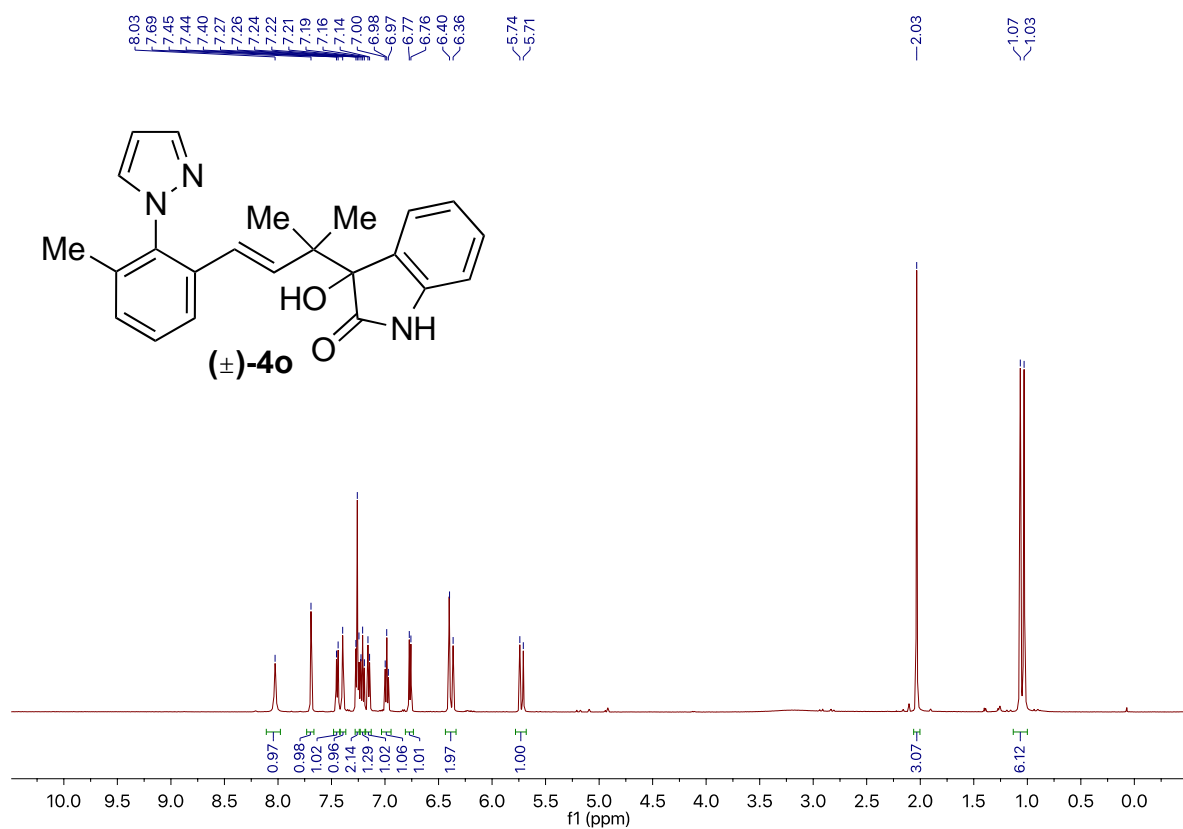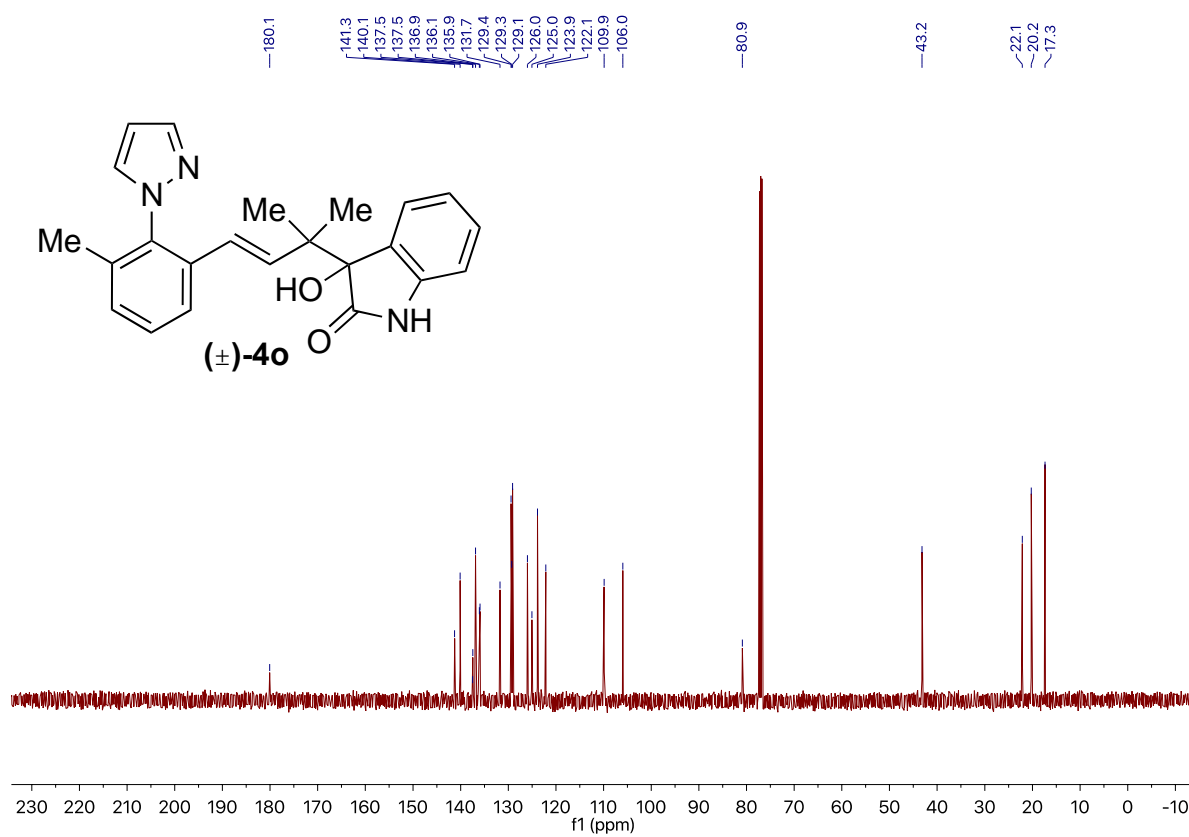



## SUPPORTING INFORMATION

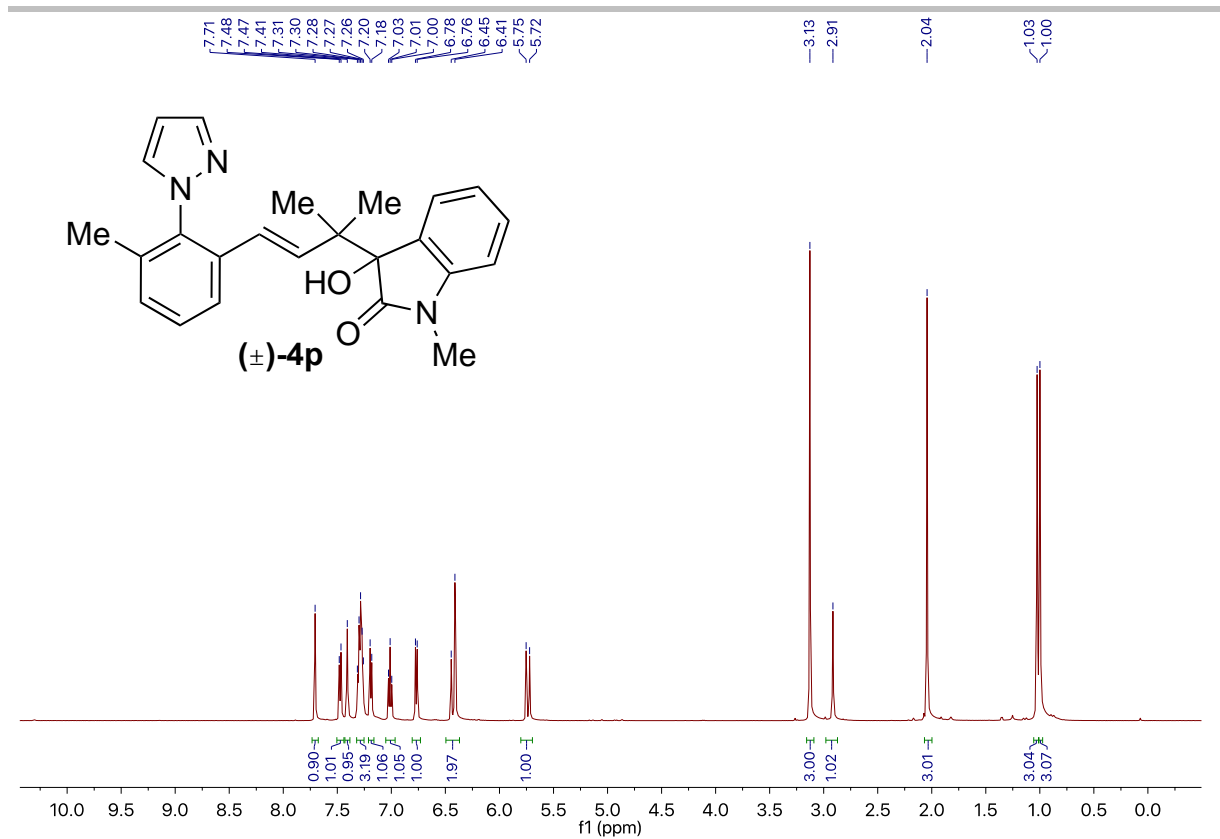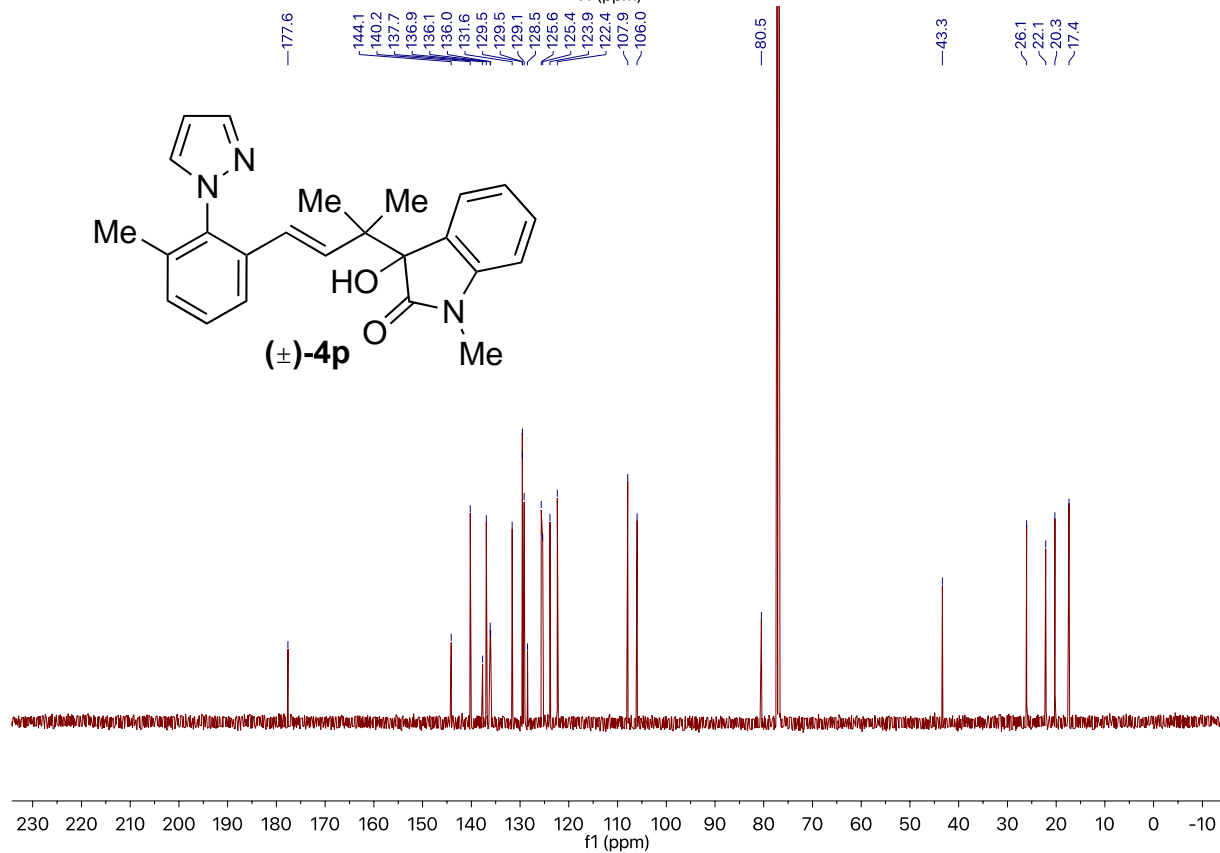

## SUPPORTING INFORMATION

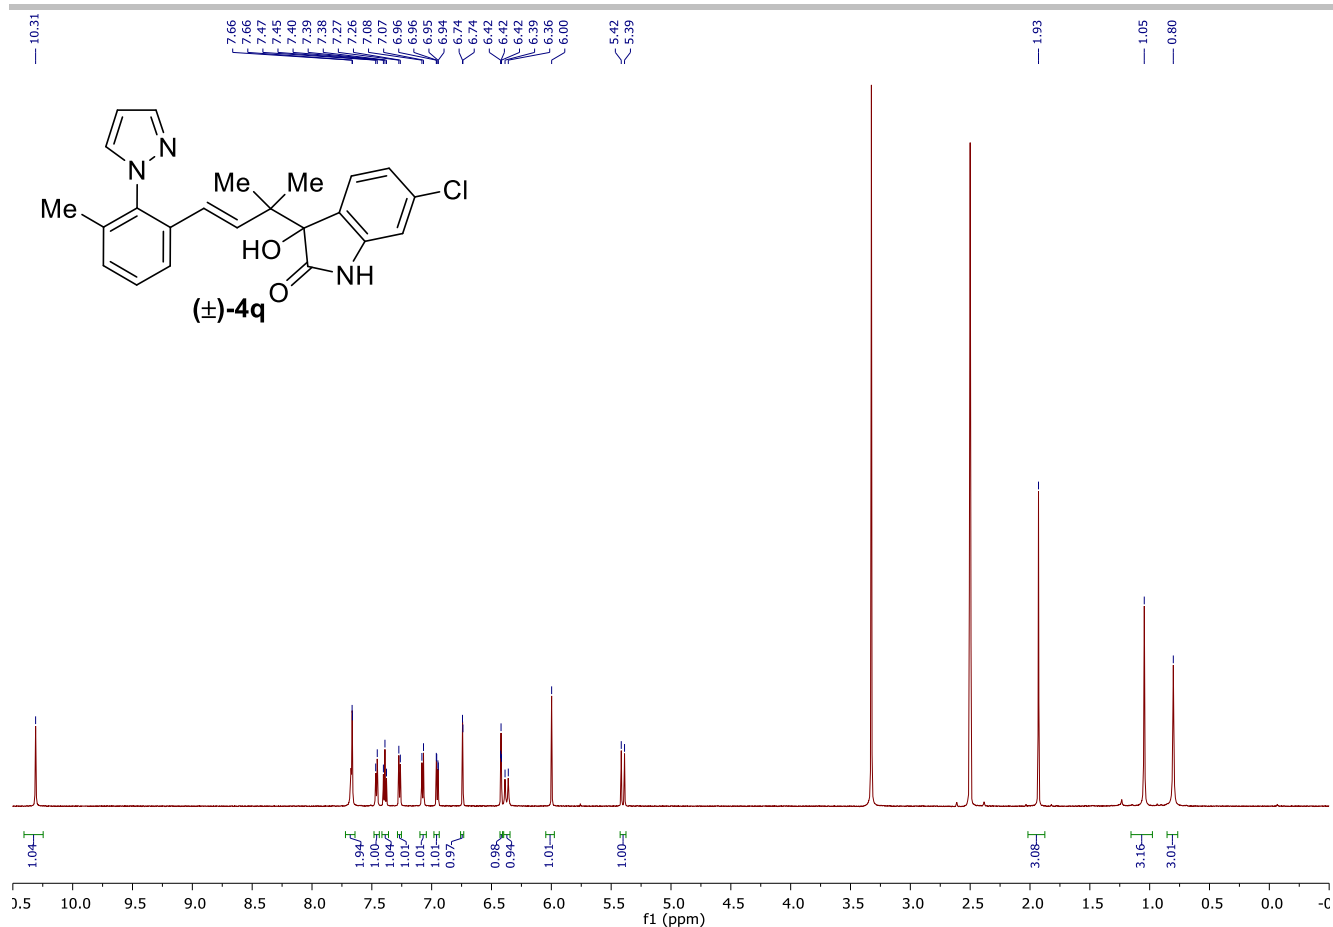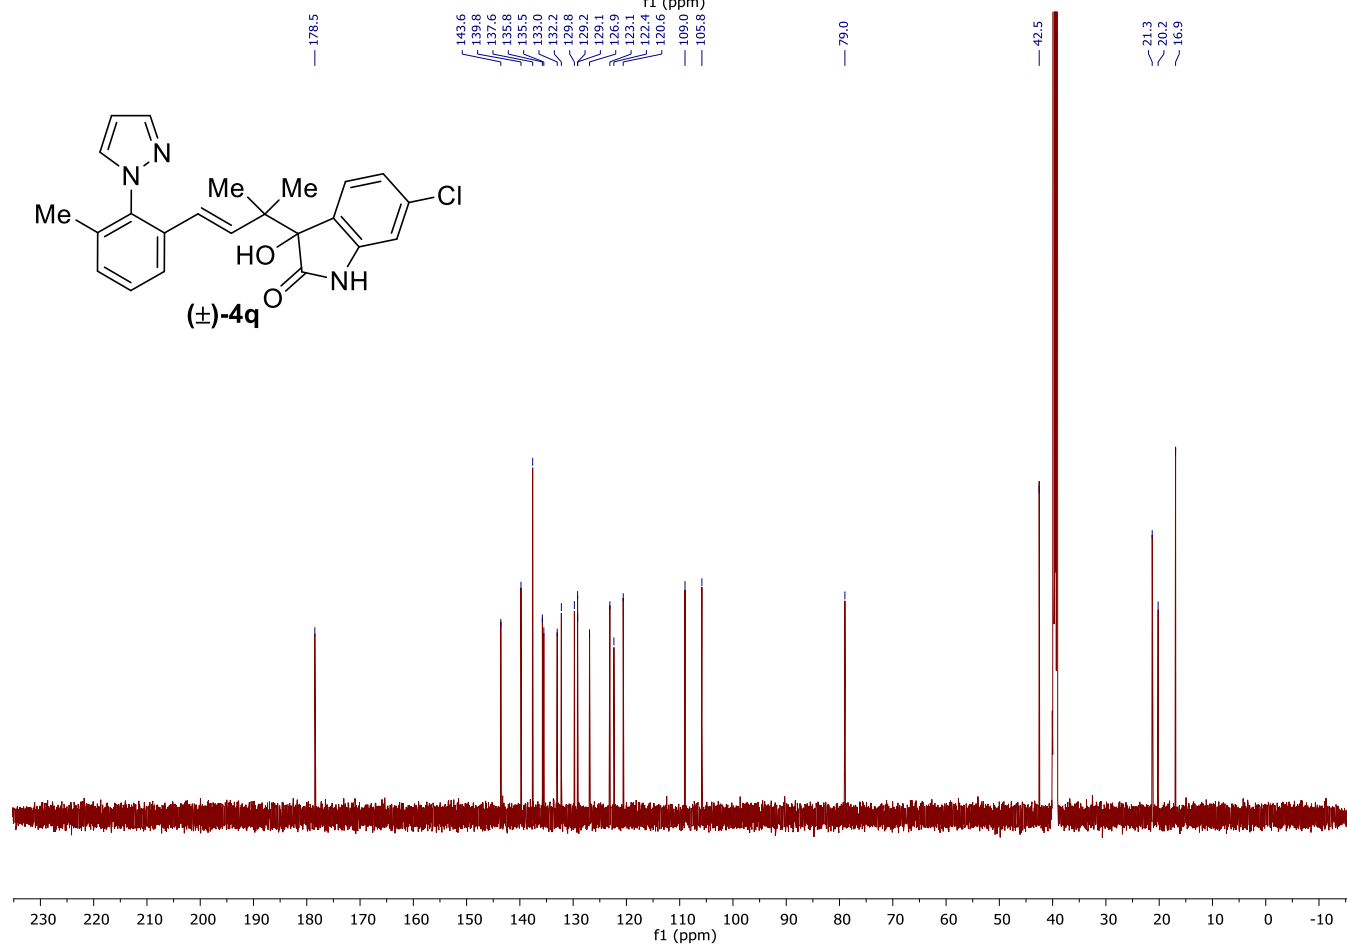

## SUPPORTING INFORMATION

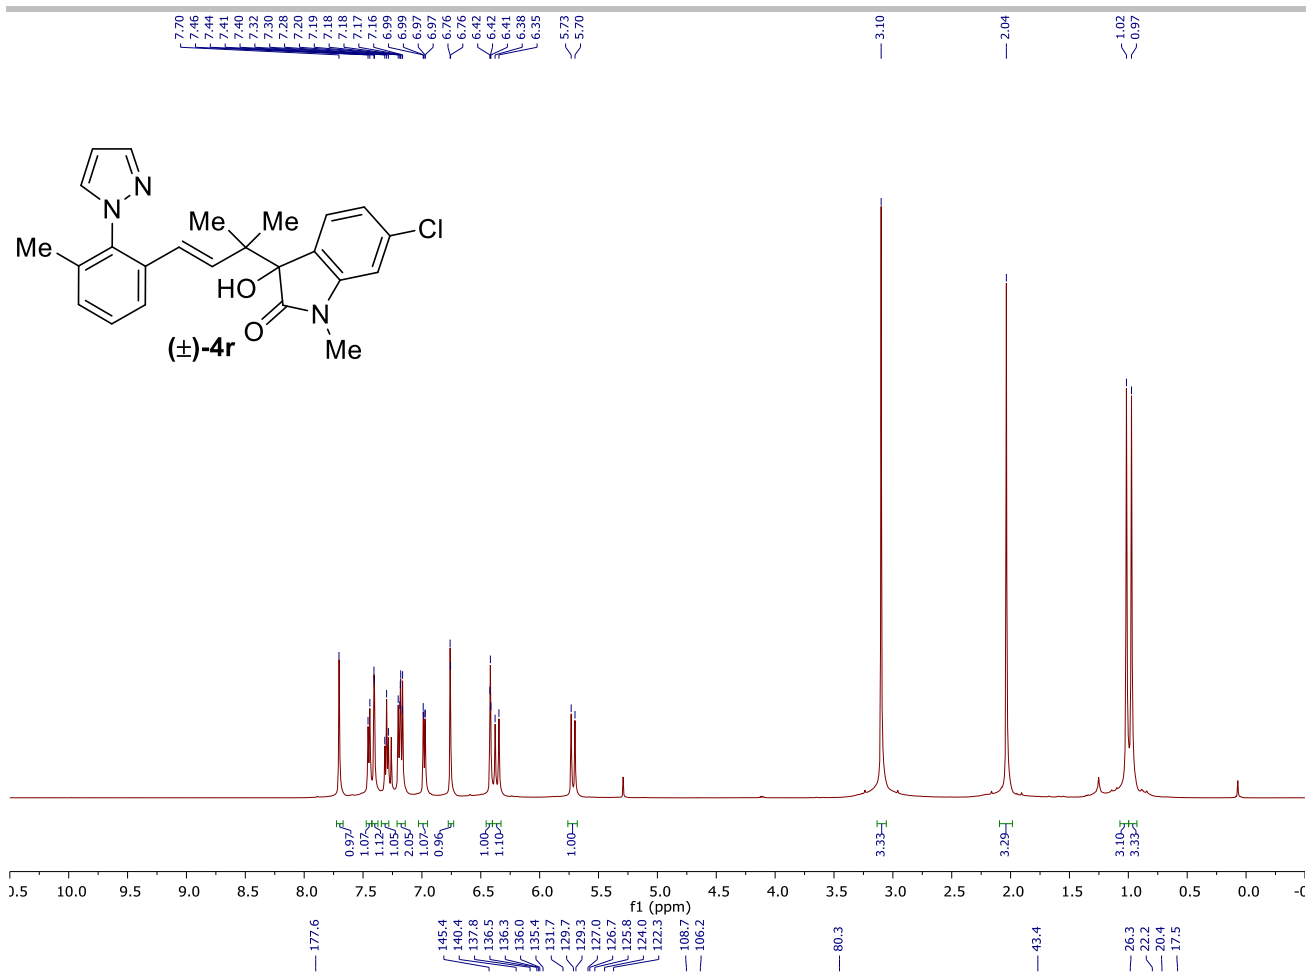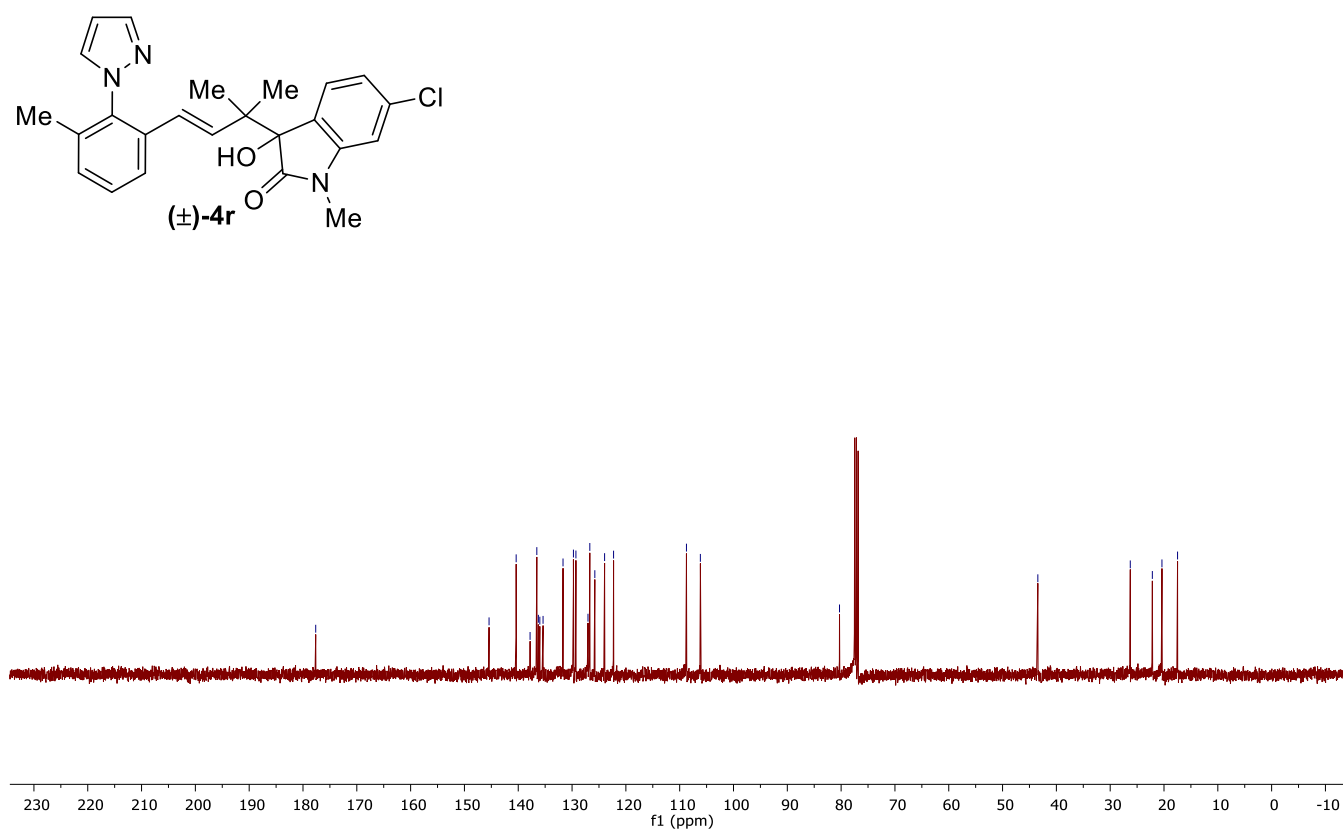

## SUPPORTING INFORMATION

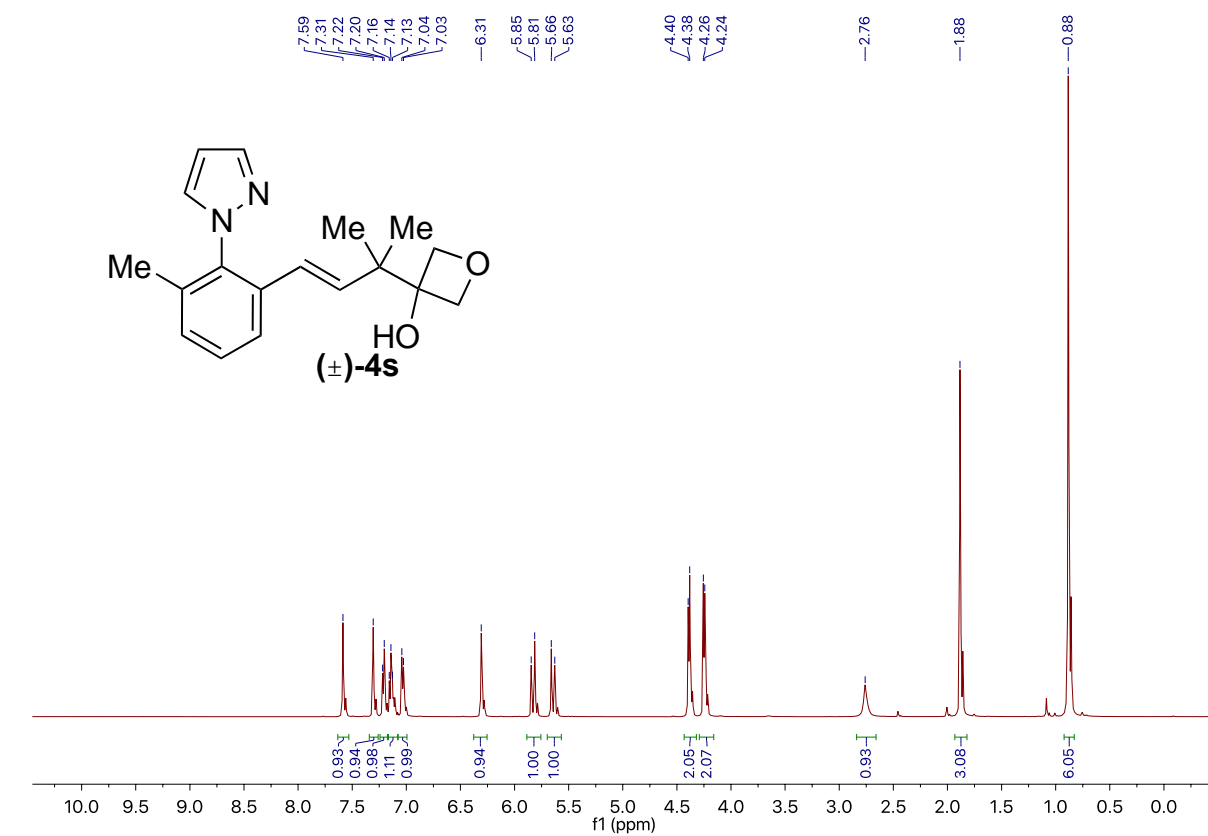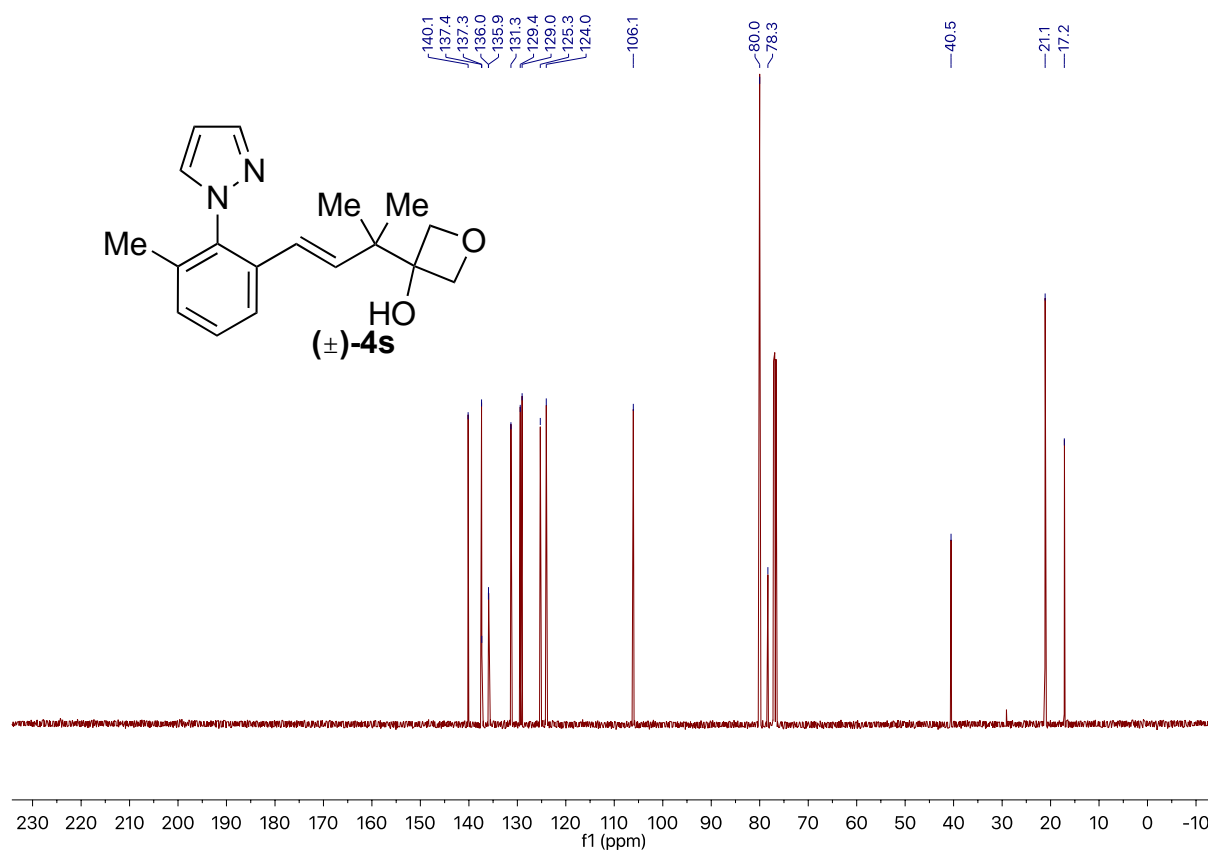

## SUPPORTING INFORMATION

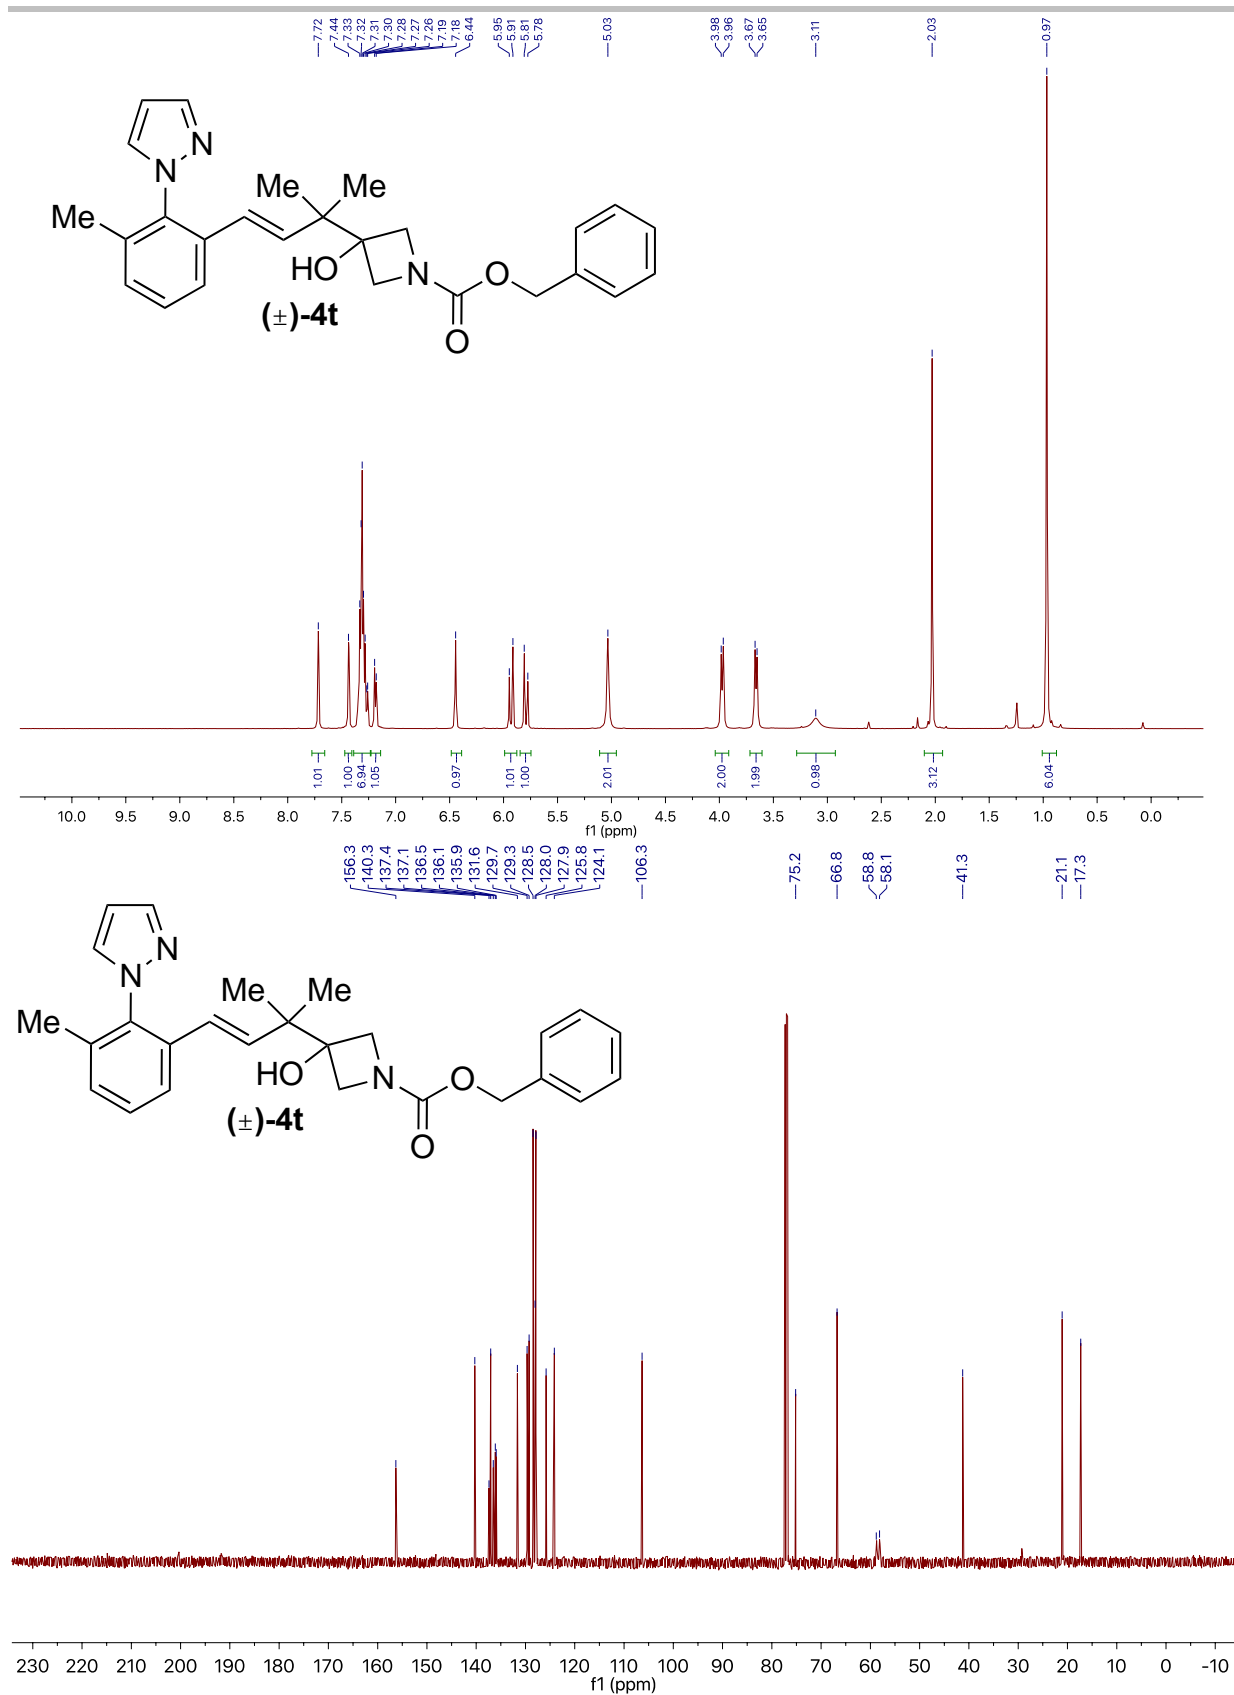

## SUPPORTING INFORMATION

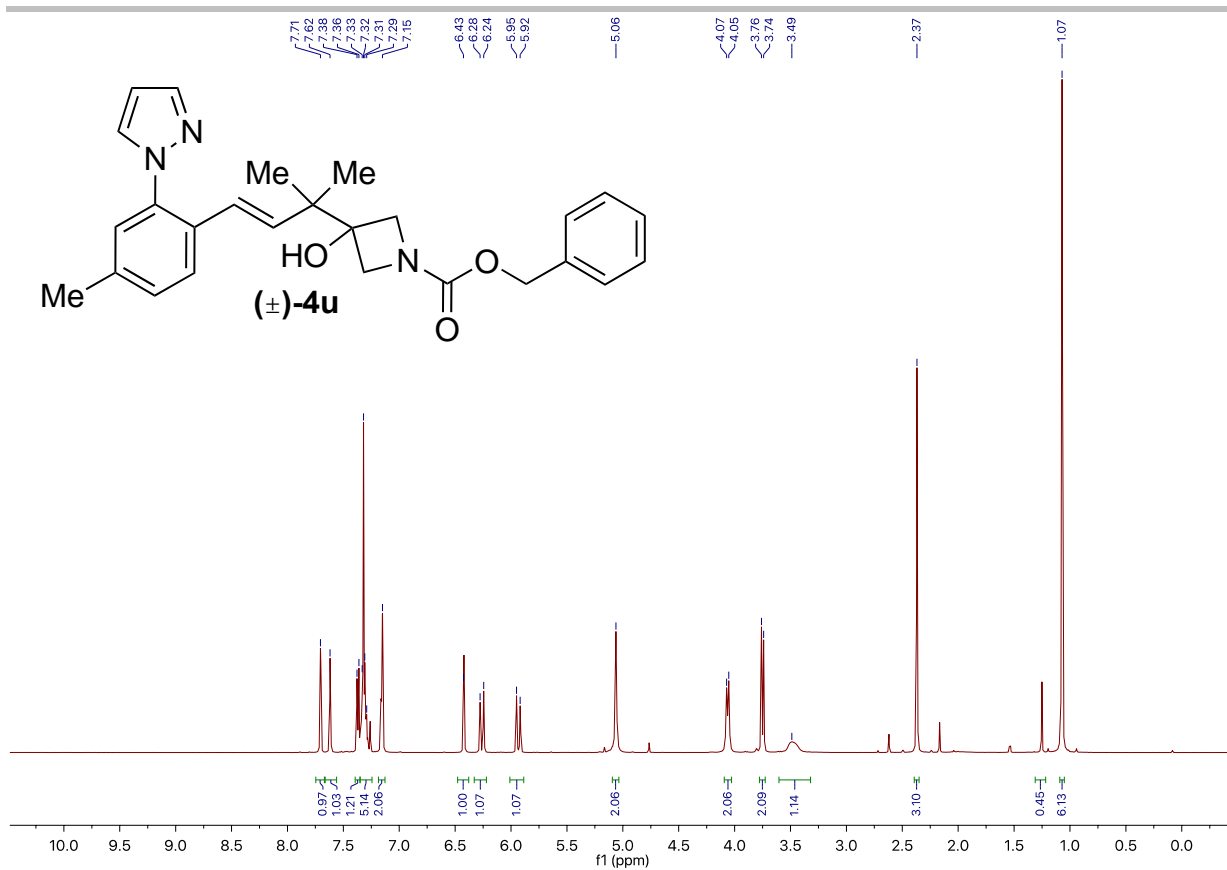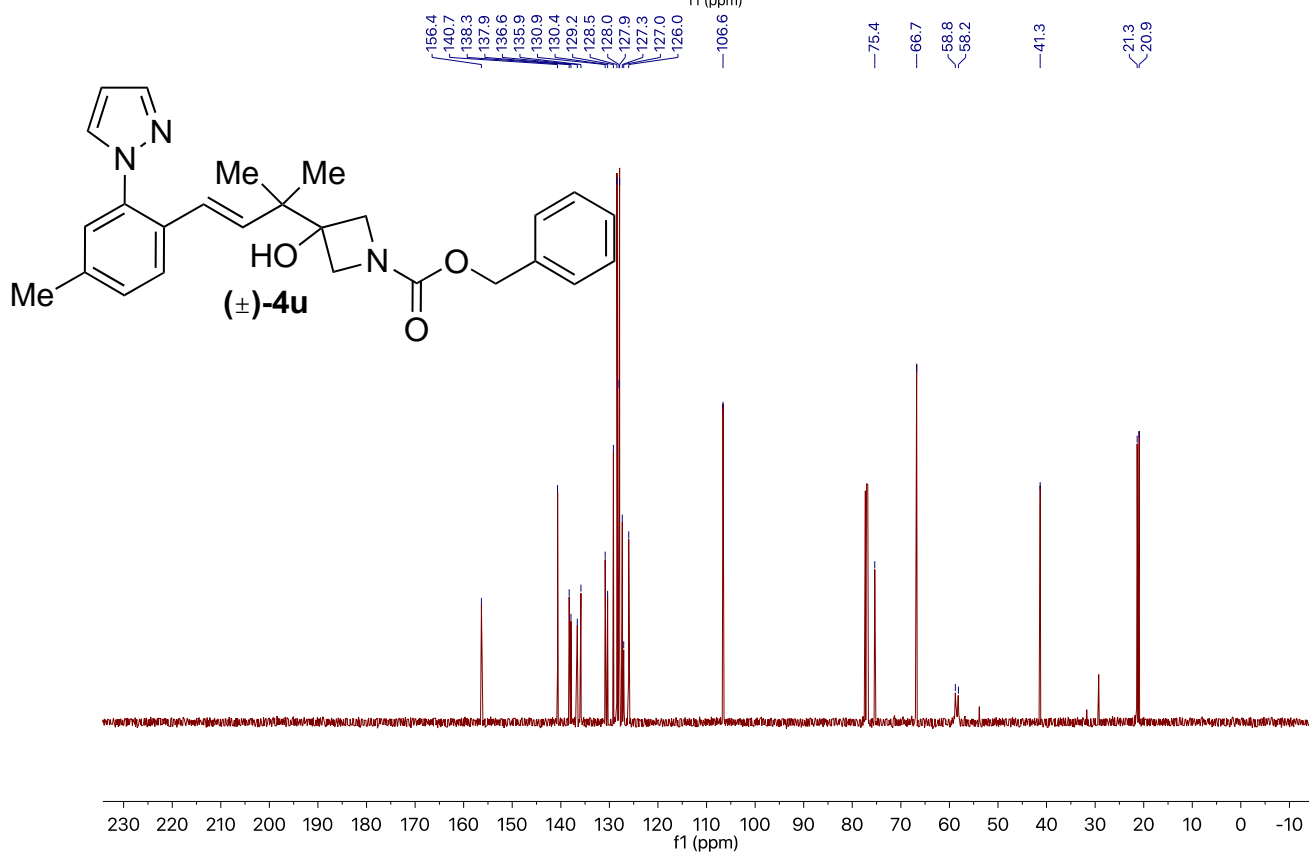

## SUPPORTING INFORMATION

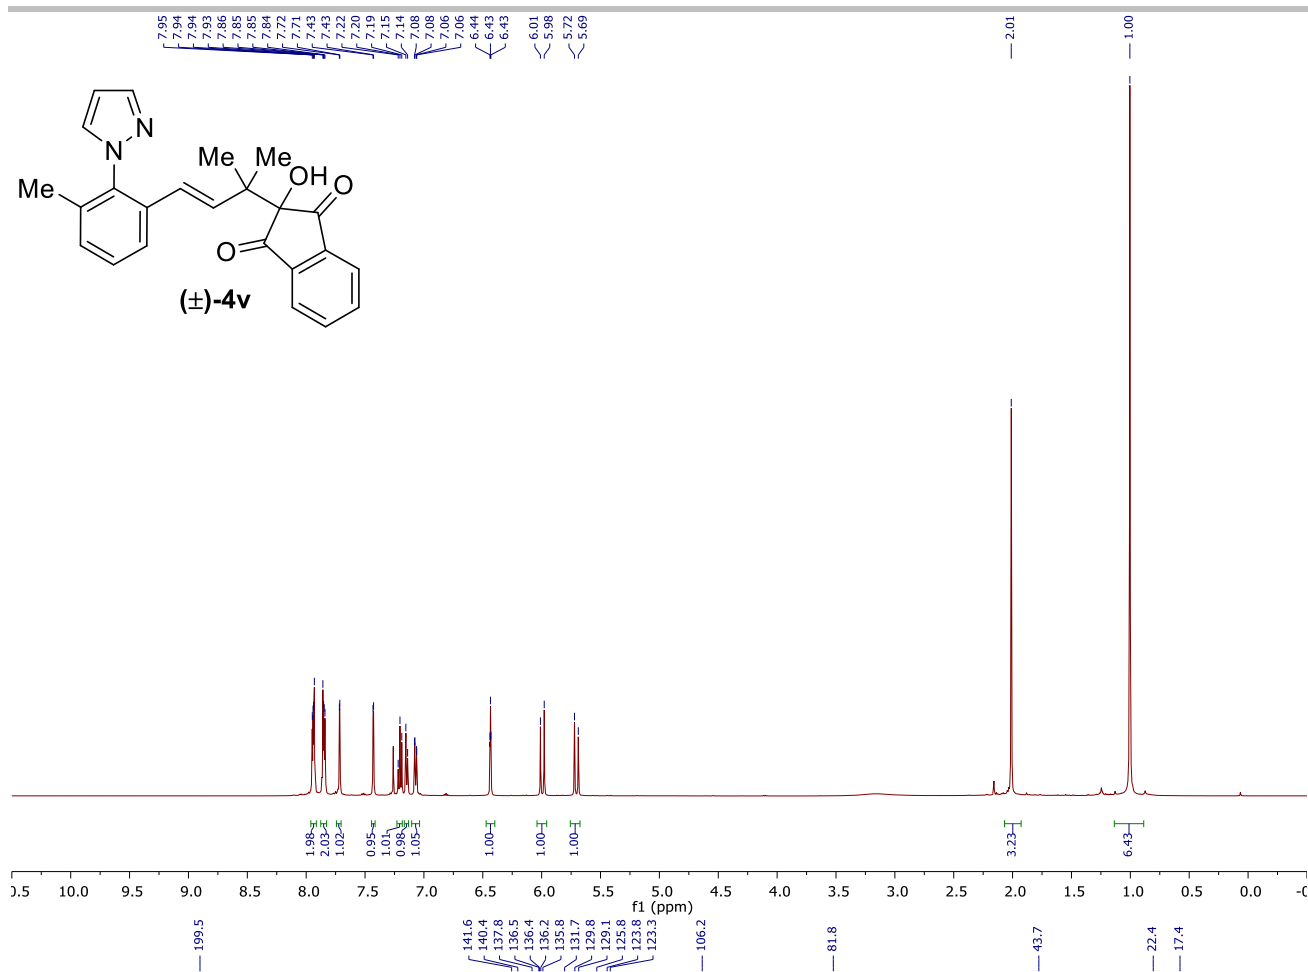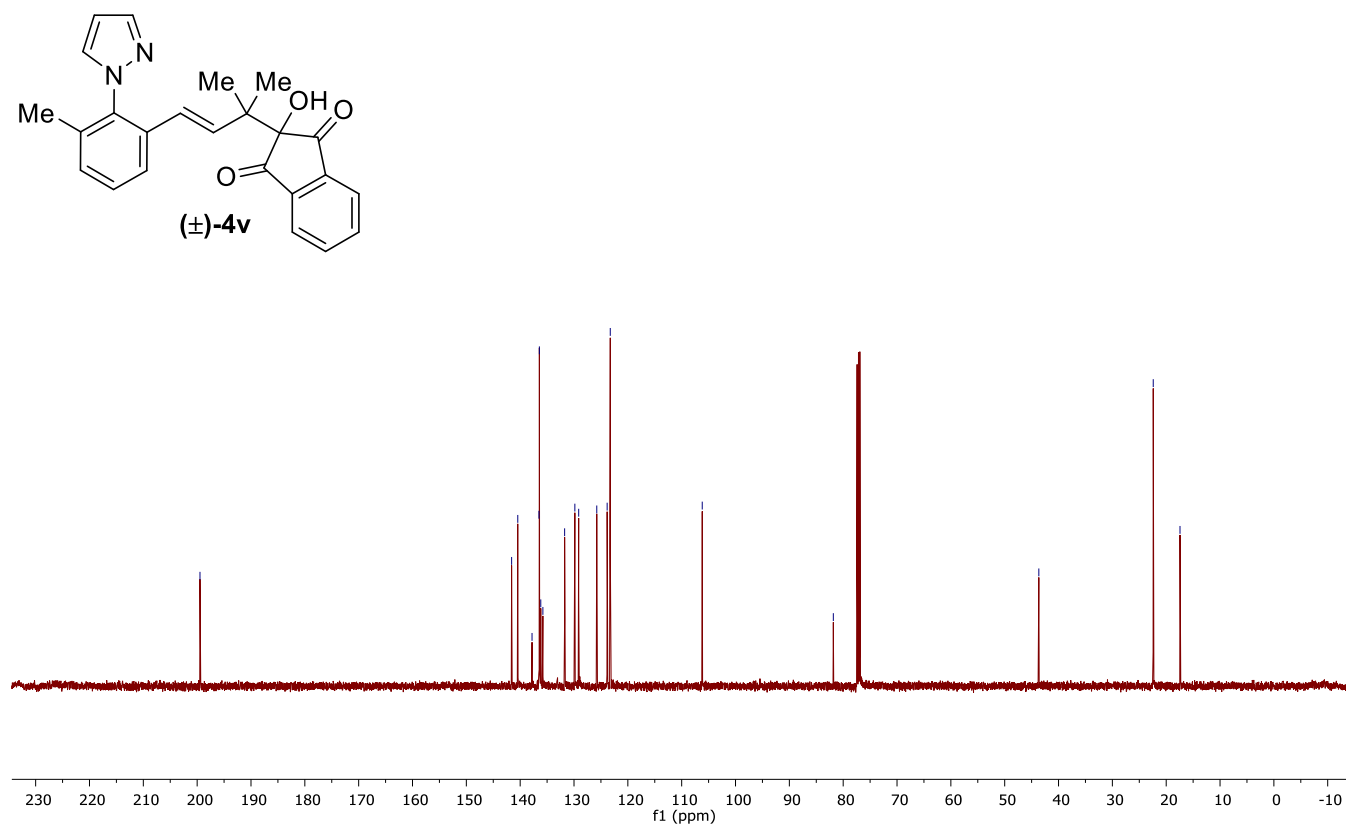

## SUPPORTING INFORMATION

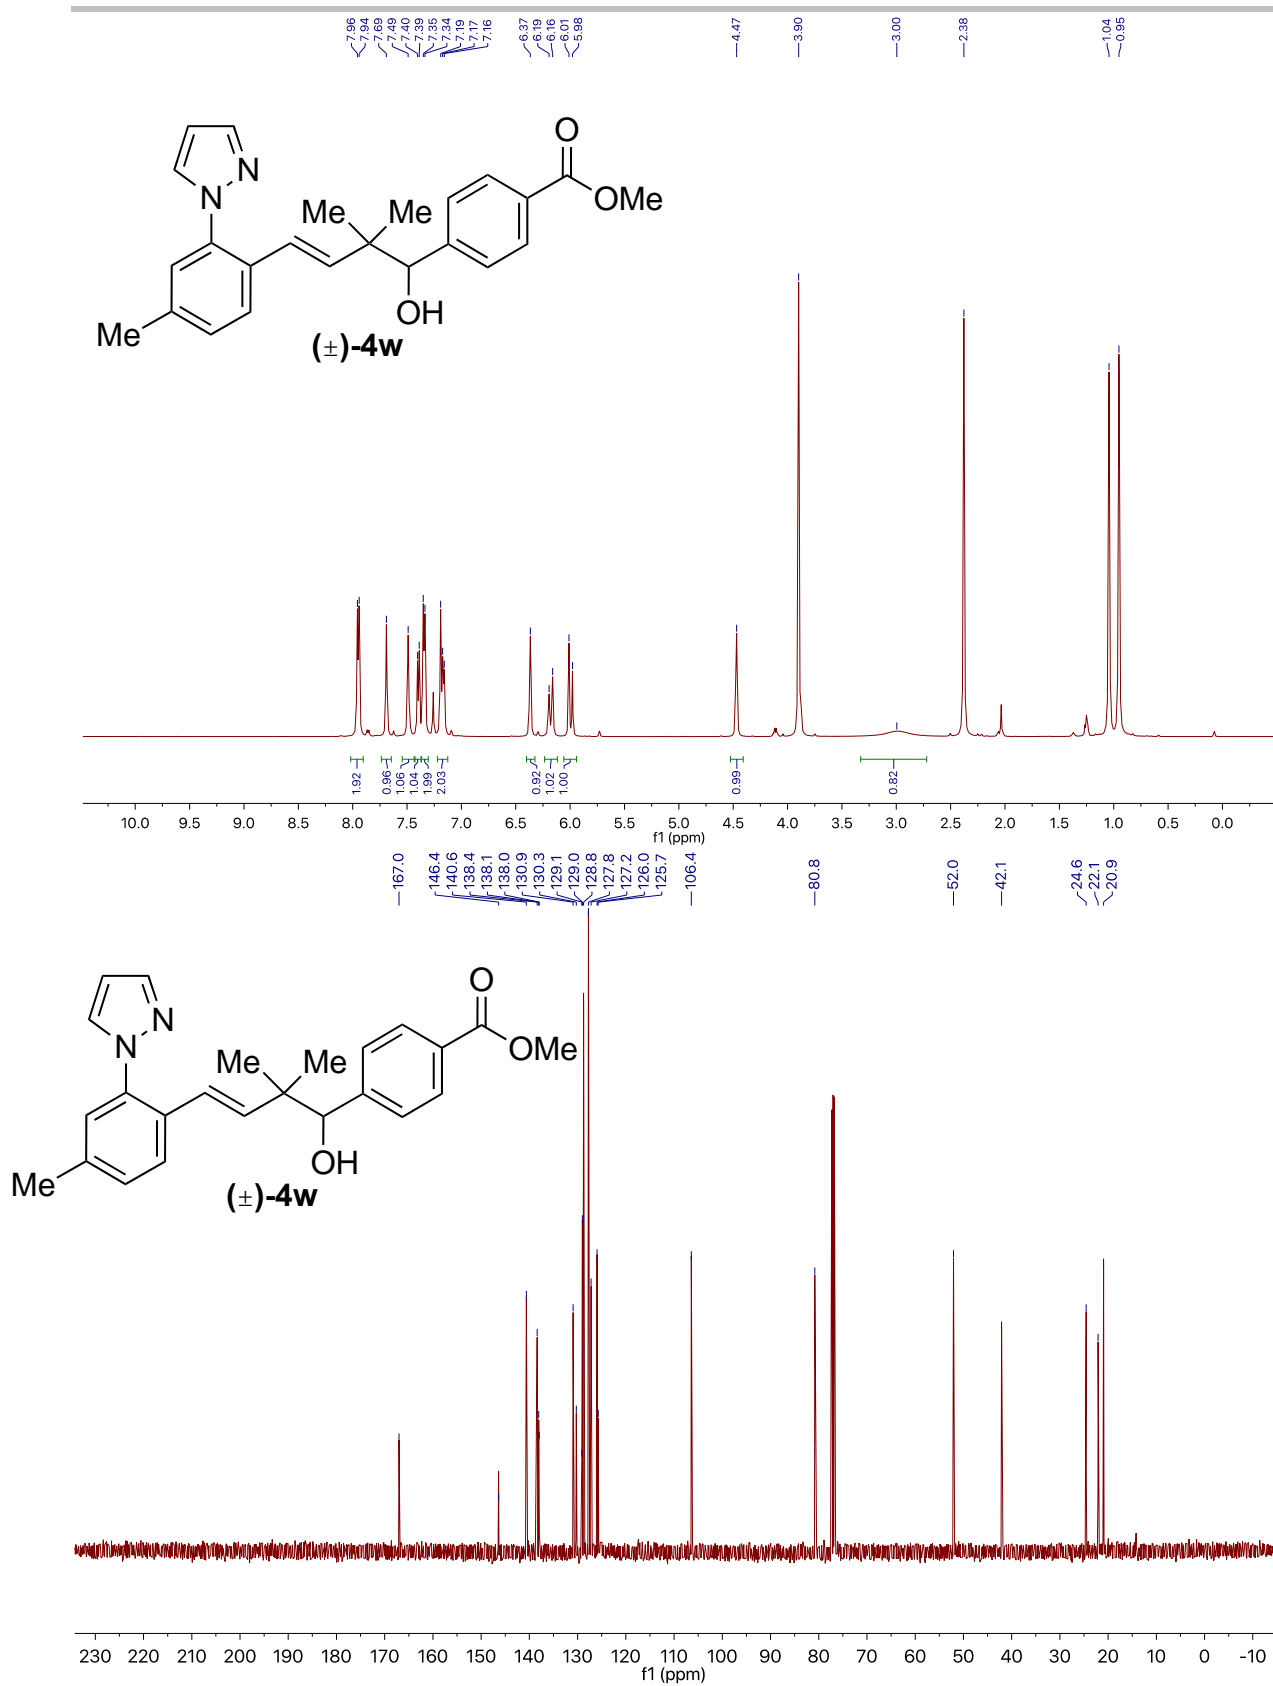



## SUPPORTING INFORMATION

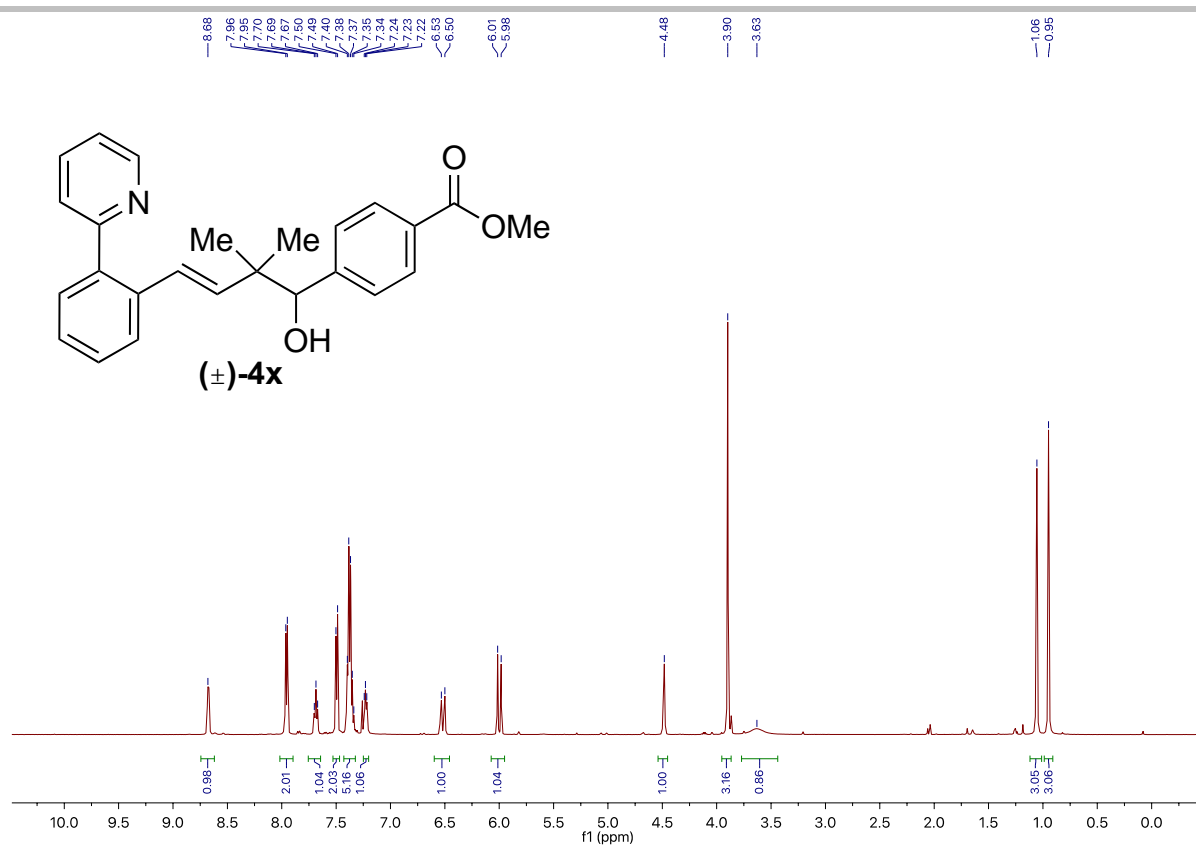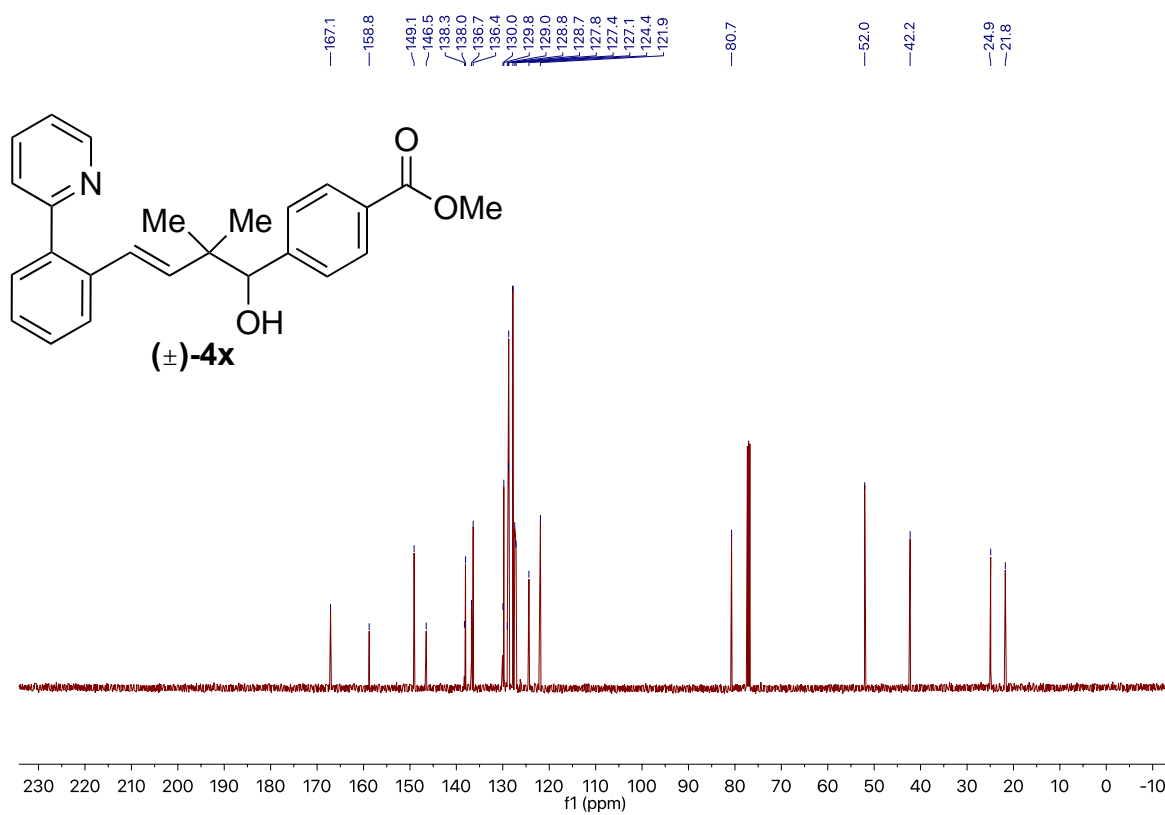

## SUPPORTING INFORMATION

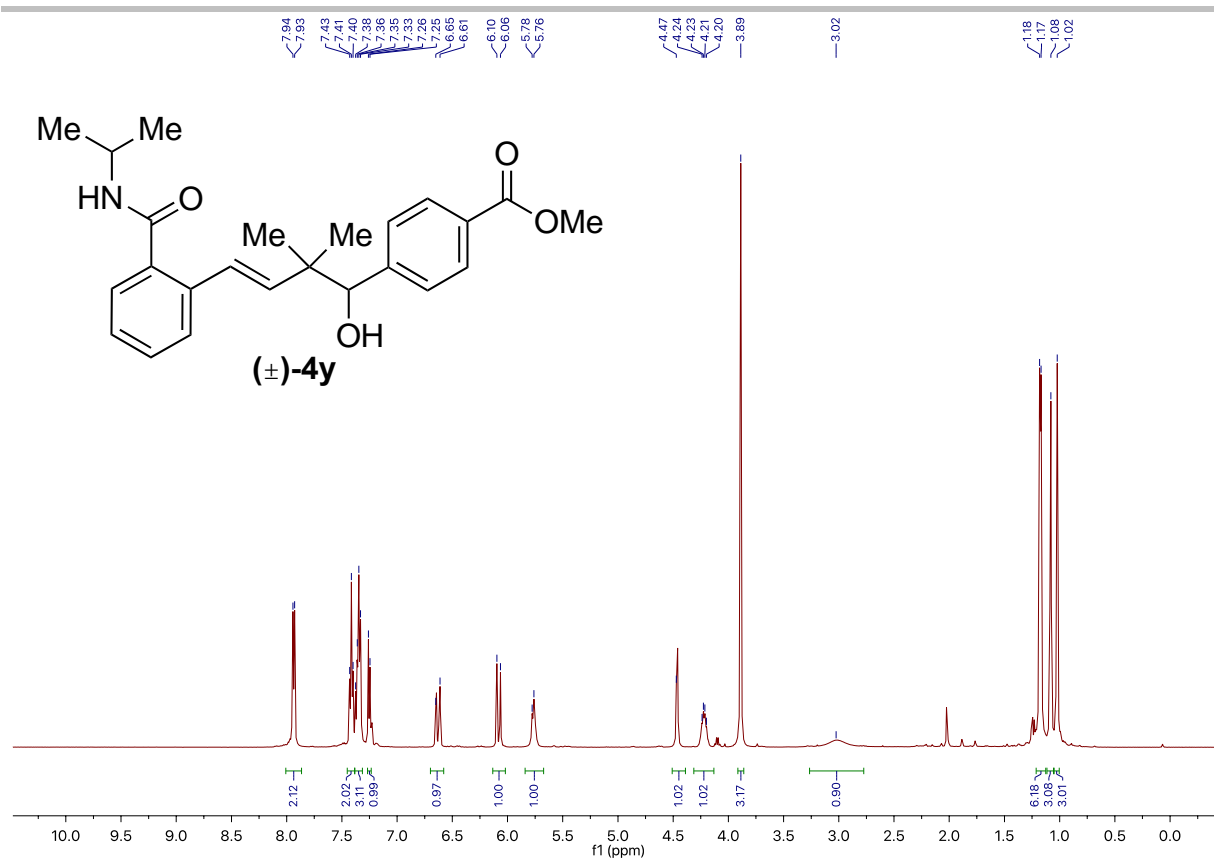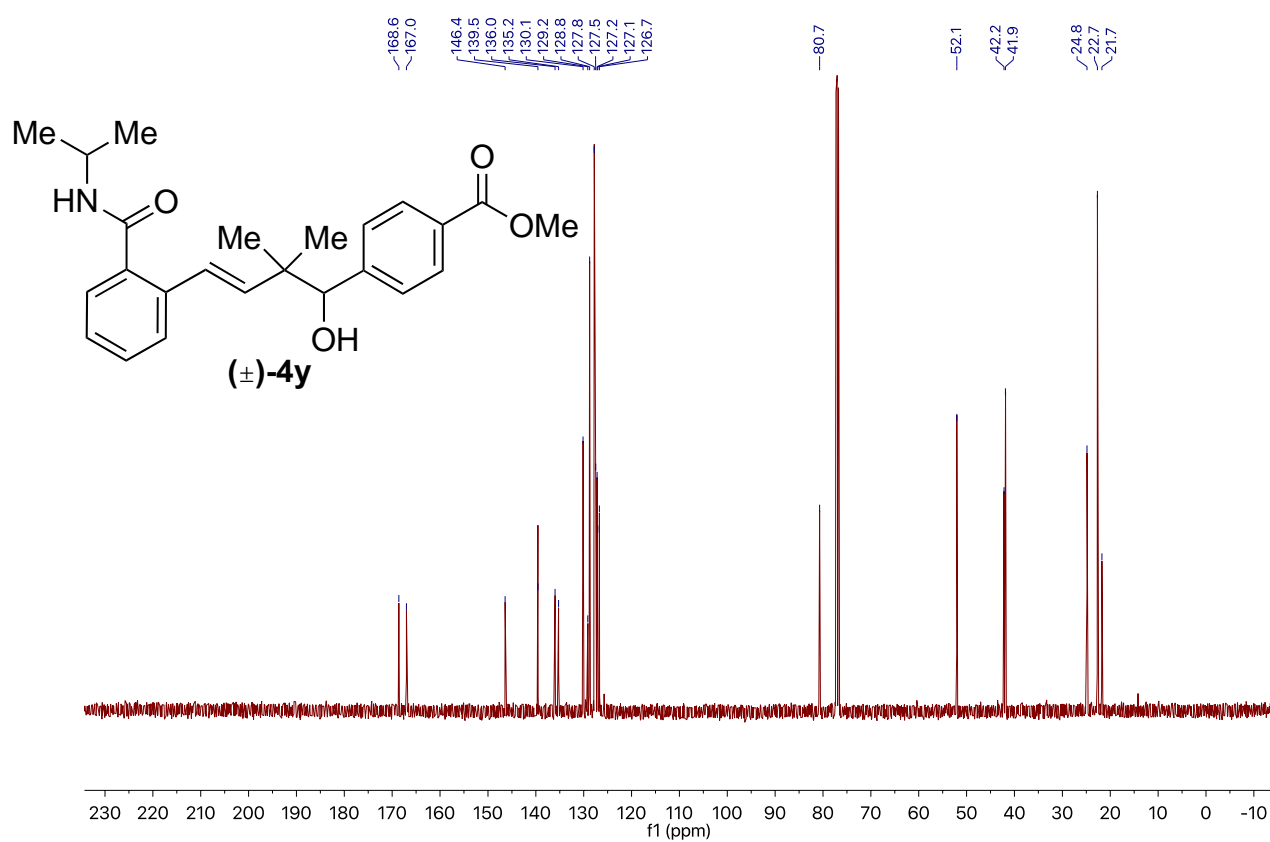

## SUPPORTING INFORMATION

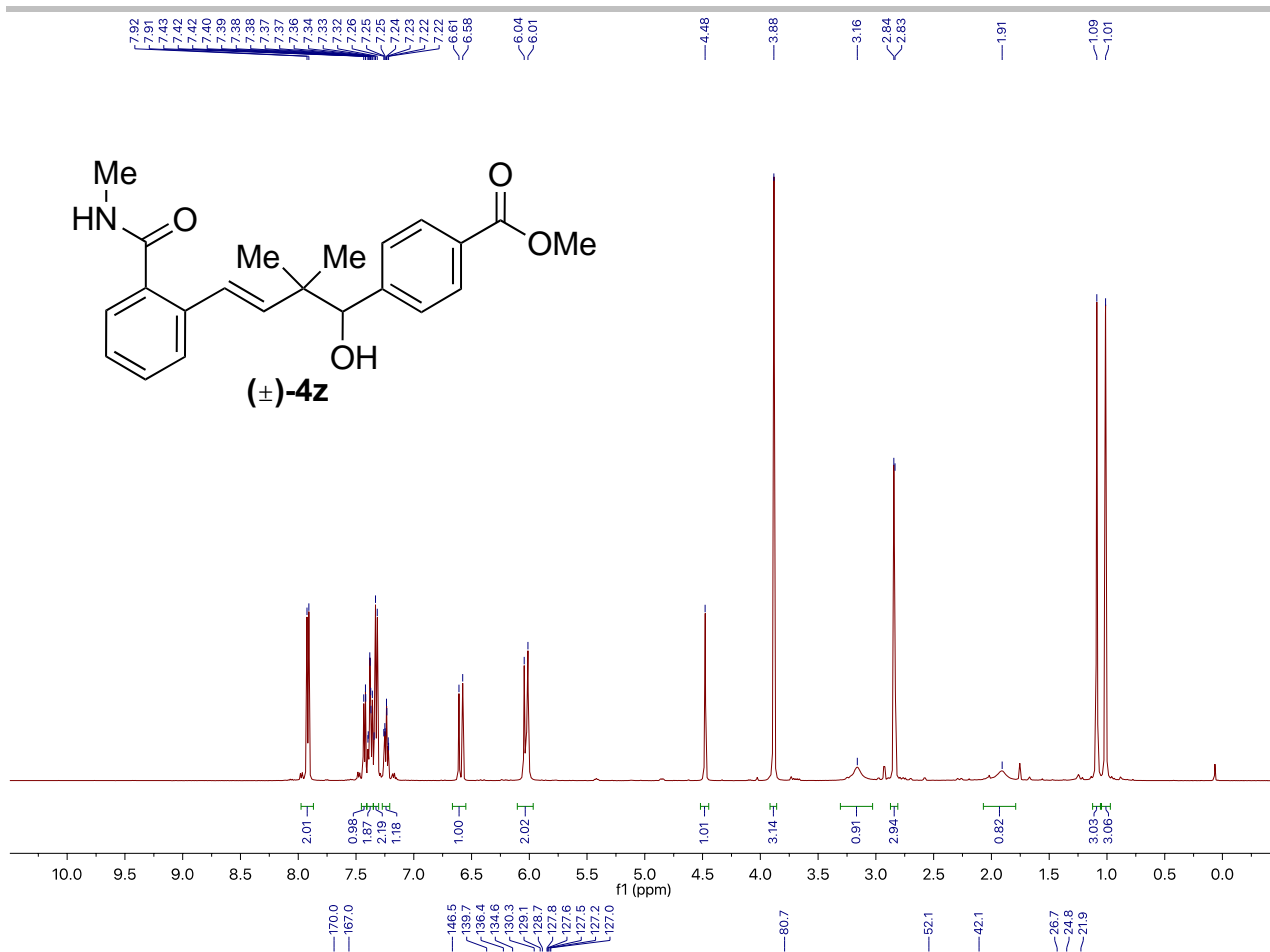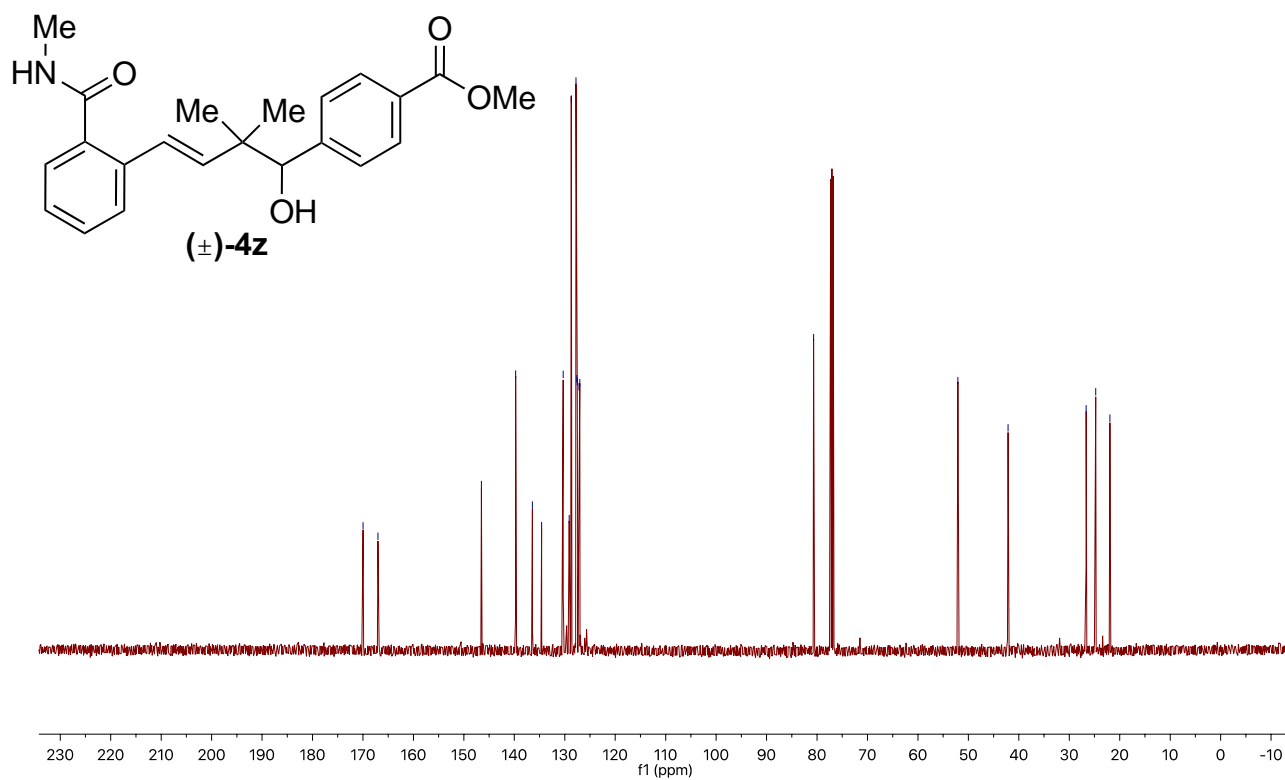

## SUPPORTING INFORMATION

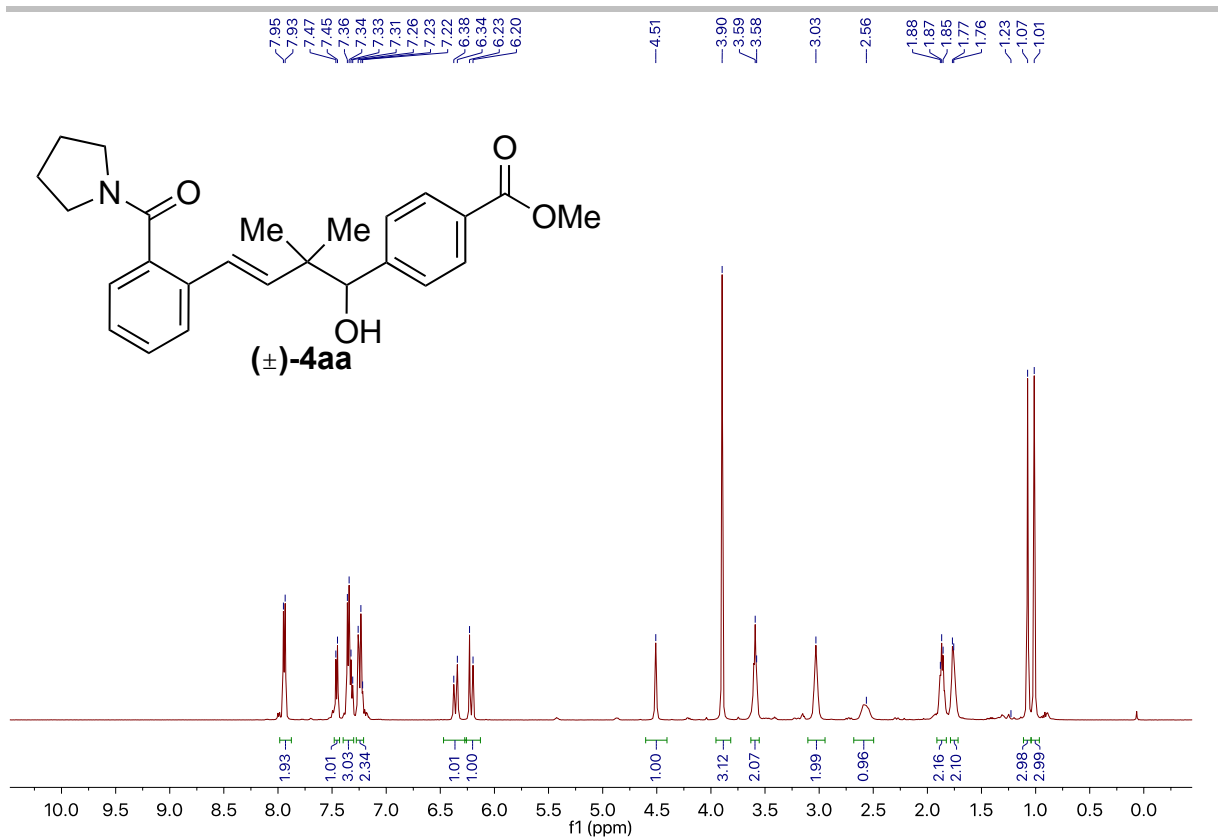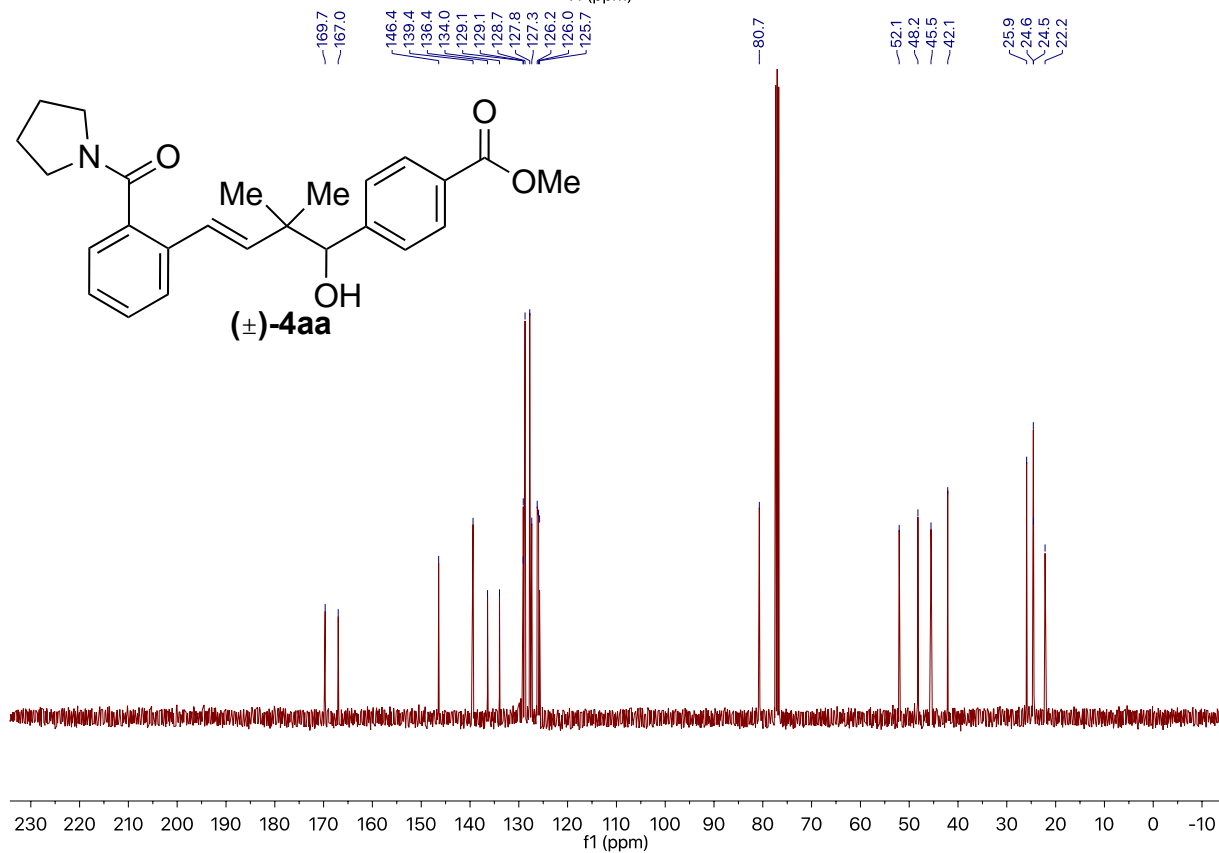

## SUPPORTING INFORMATION

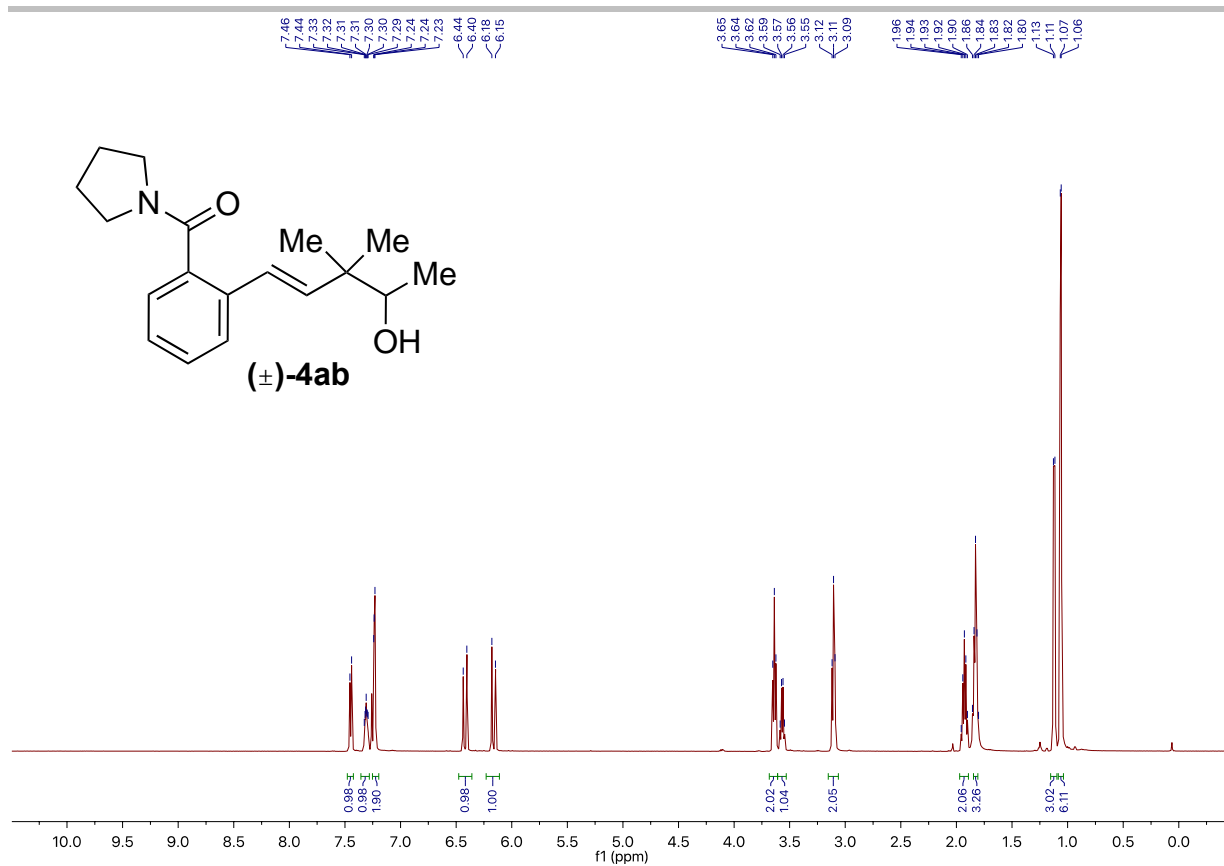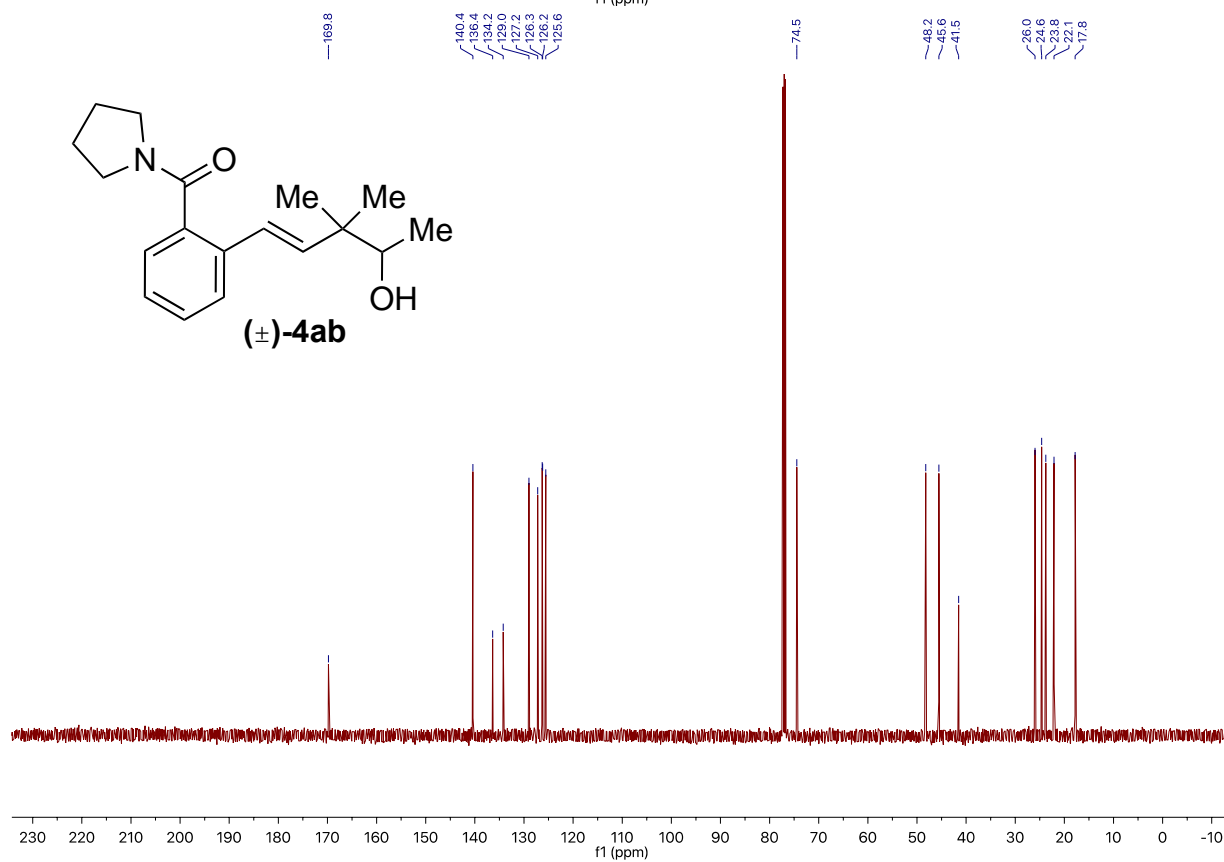

## SUPPORTING INFORMATION

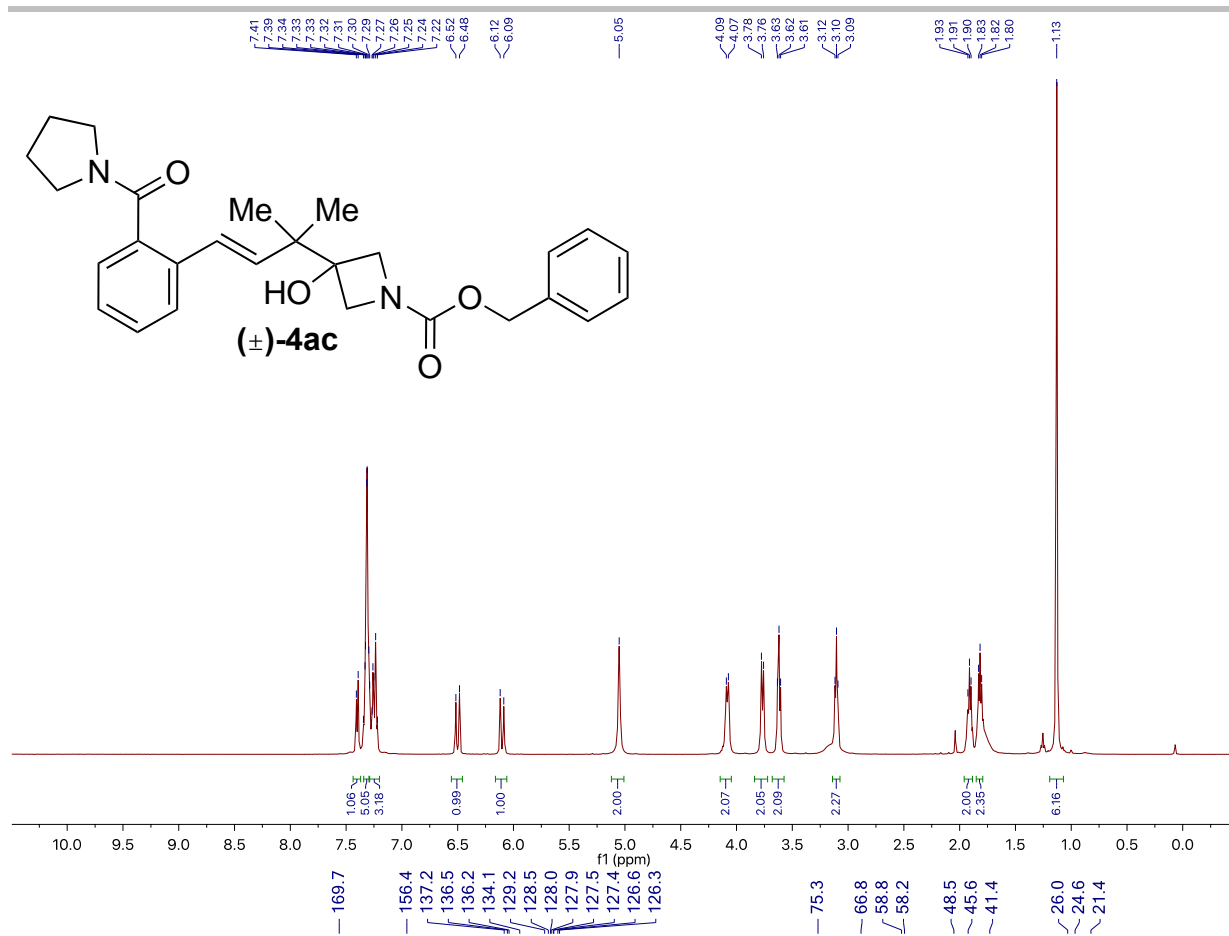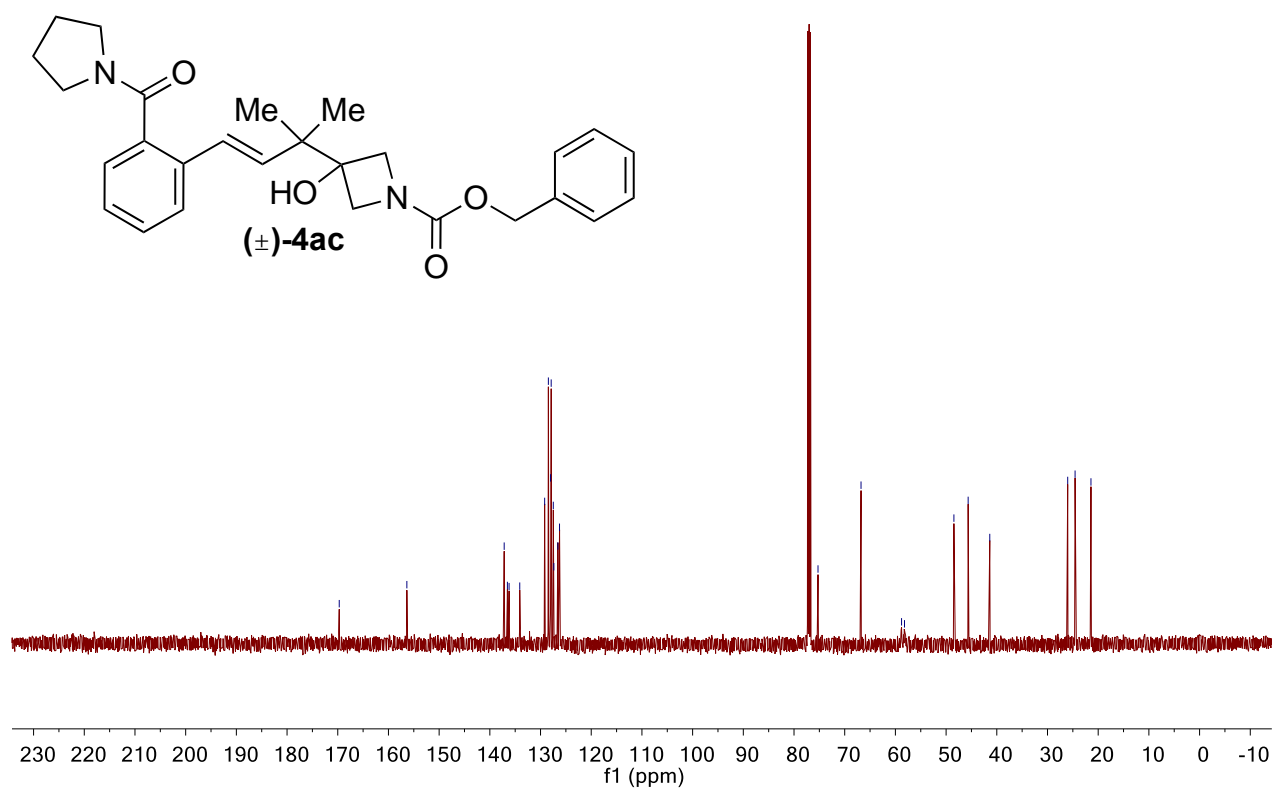

## SUPPORTING INFORMATION

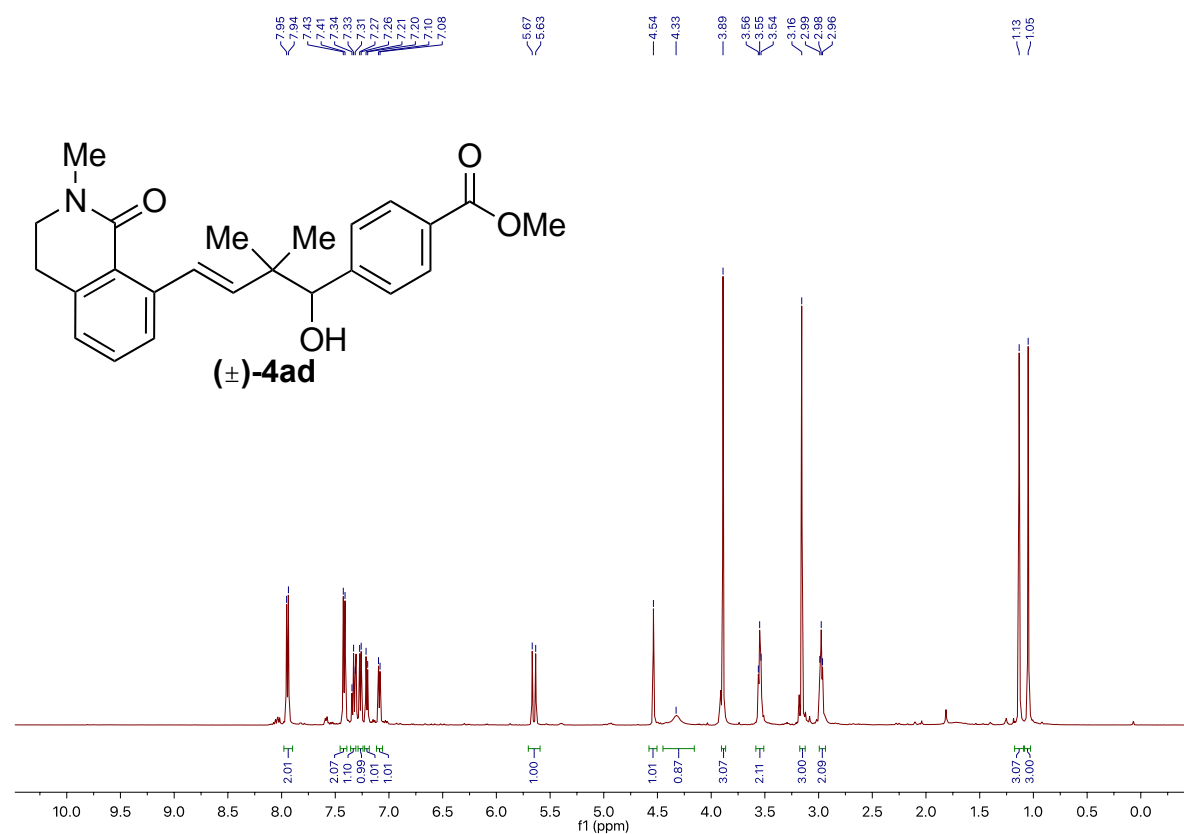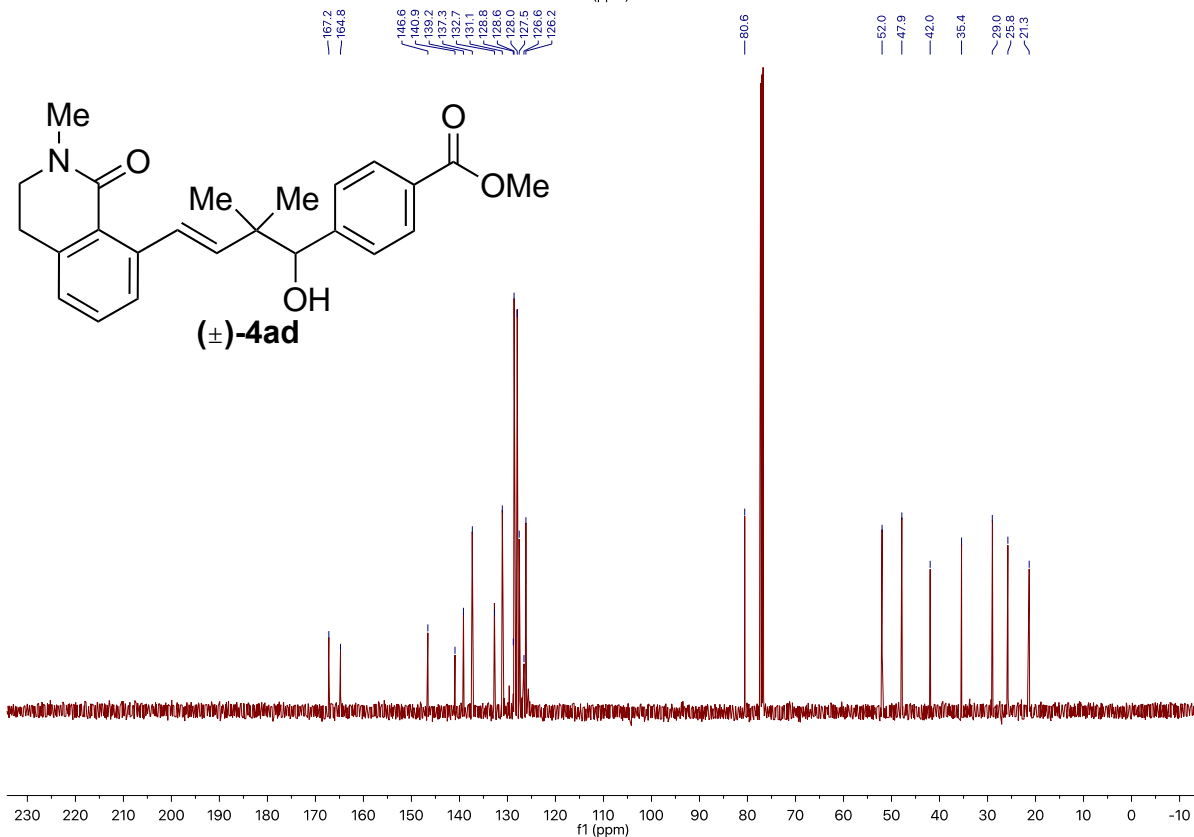

## SUPPORTING INFORMATION

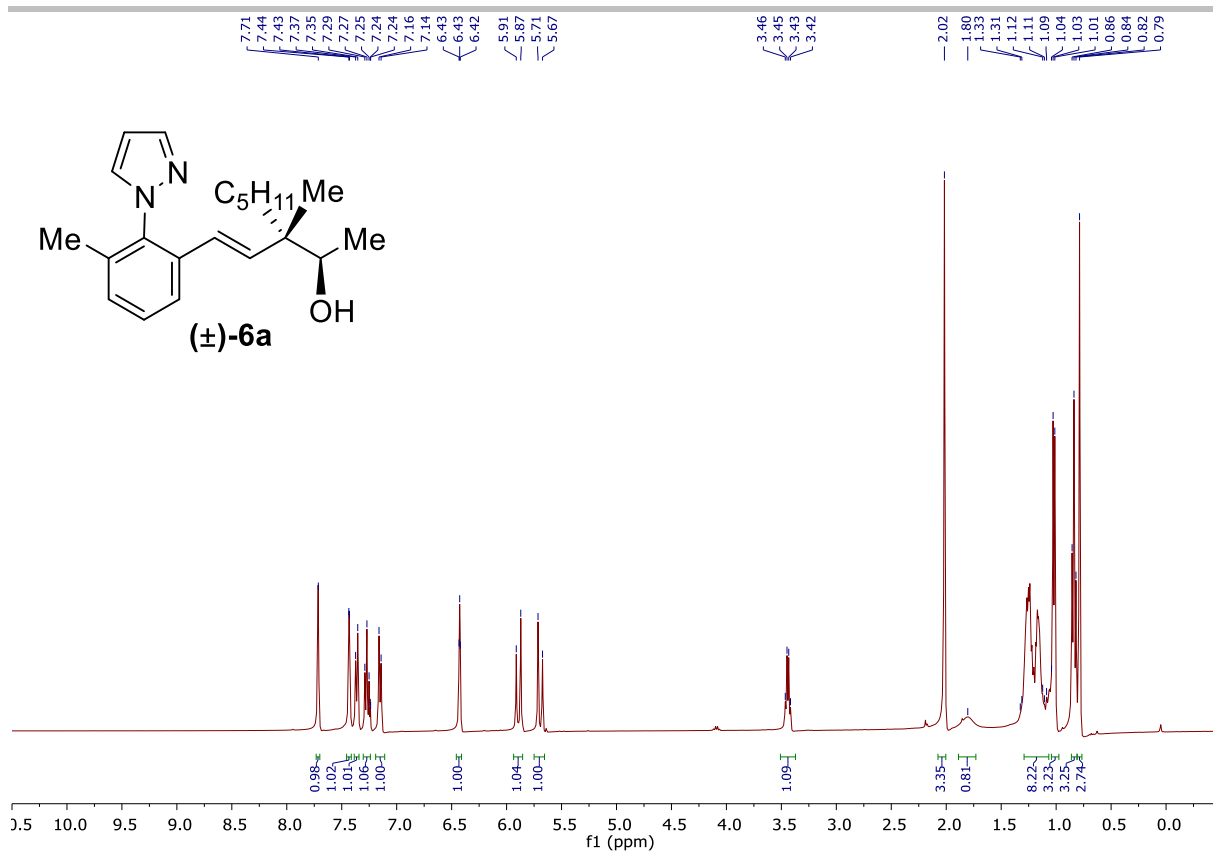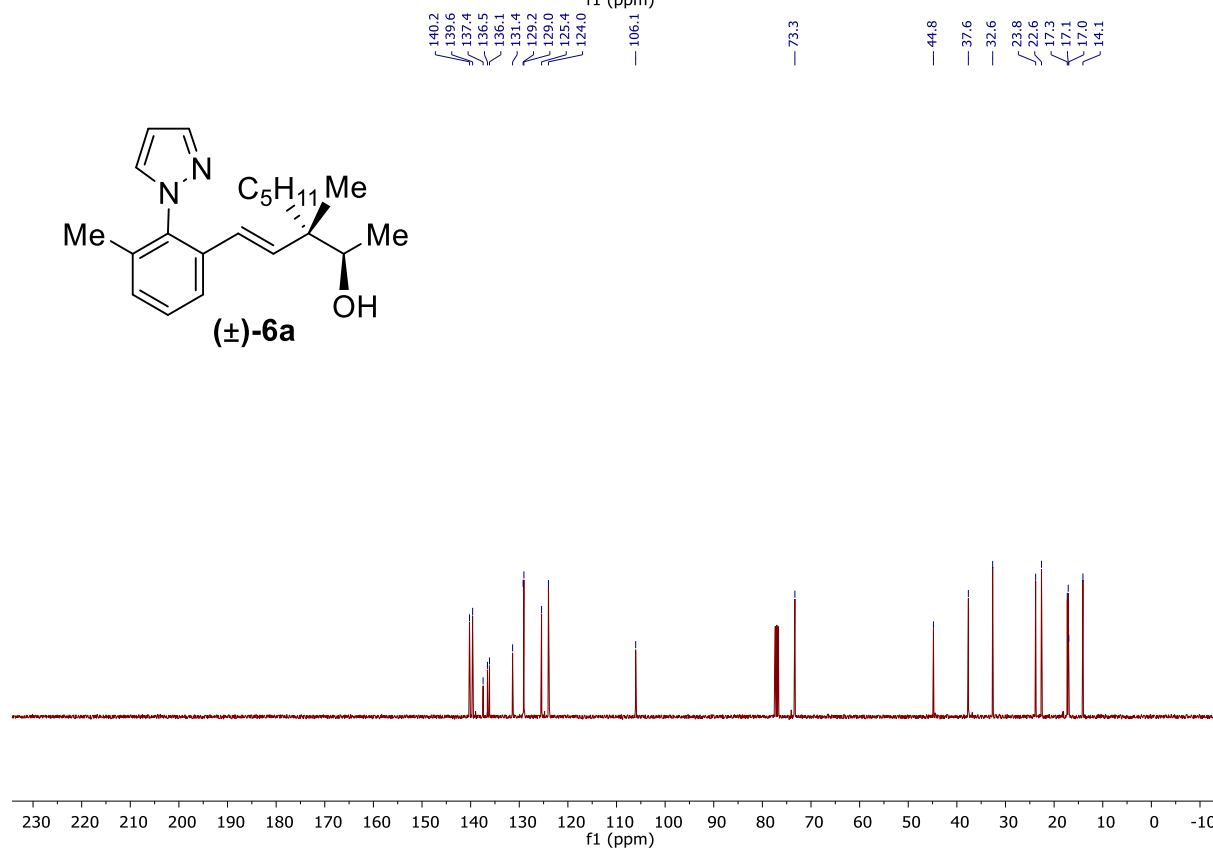



## SUPPORTING INFORMATION

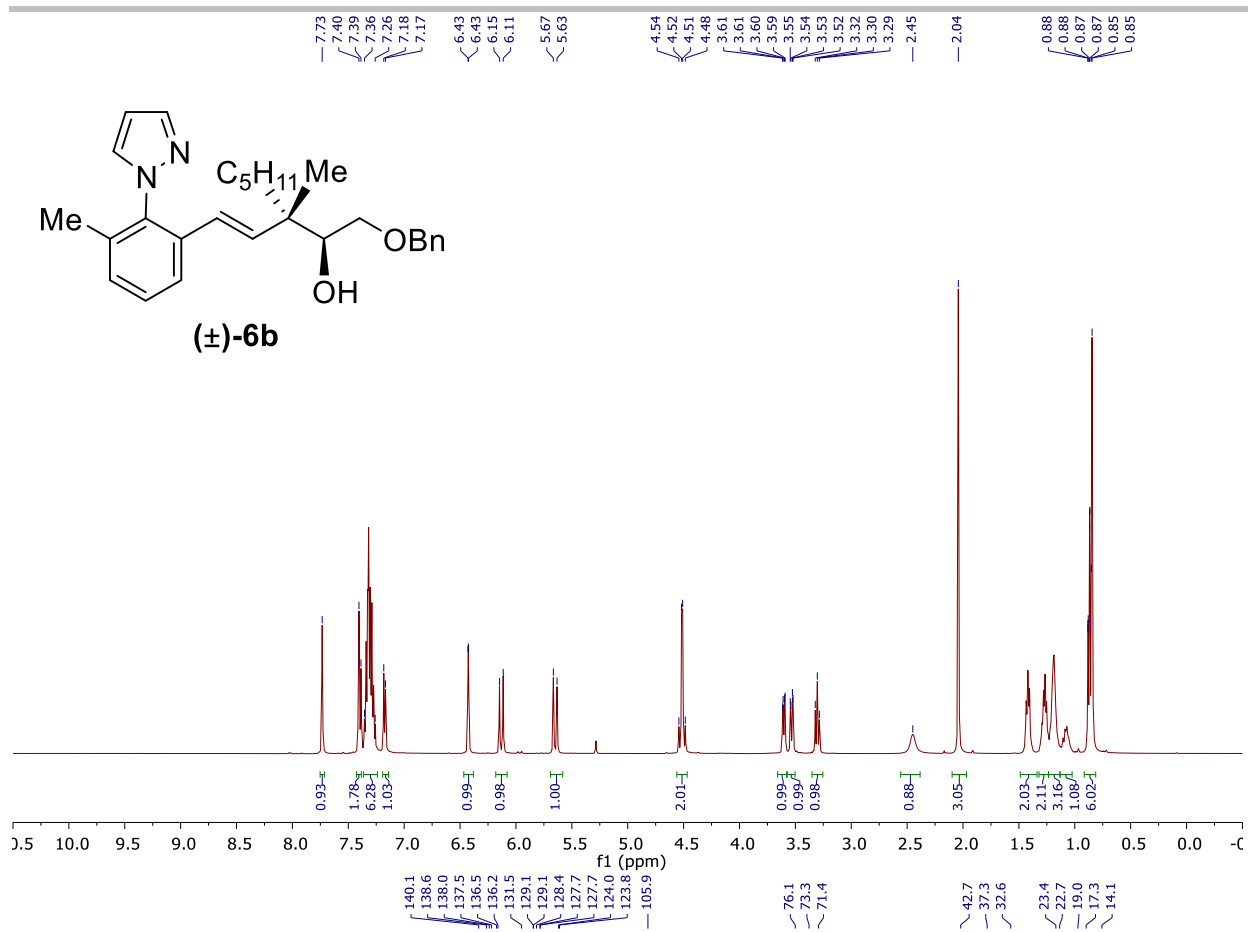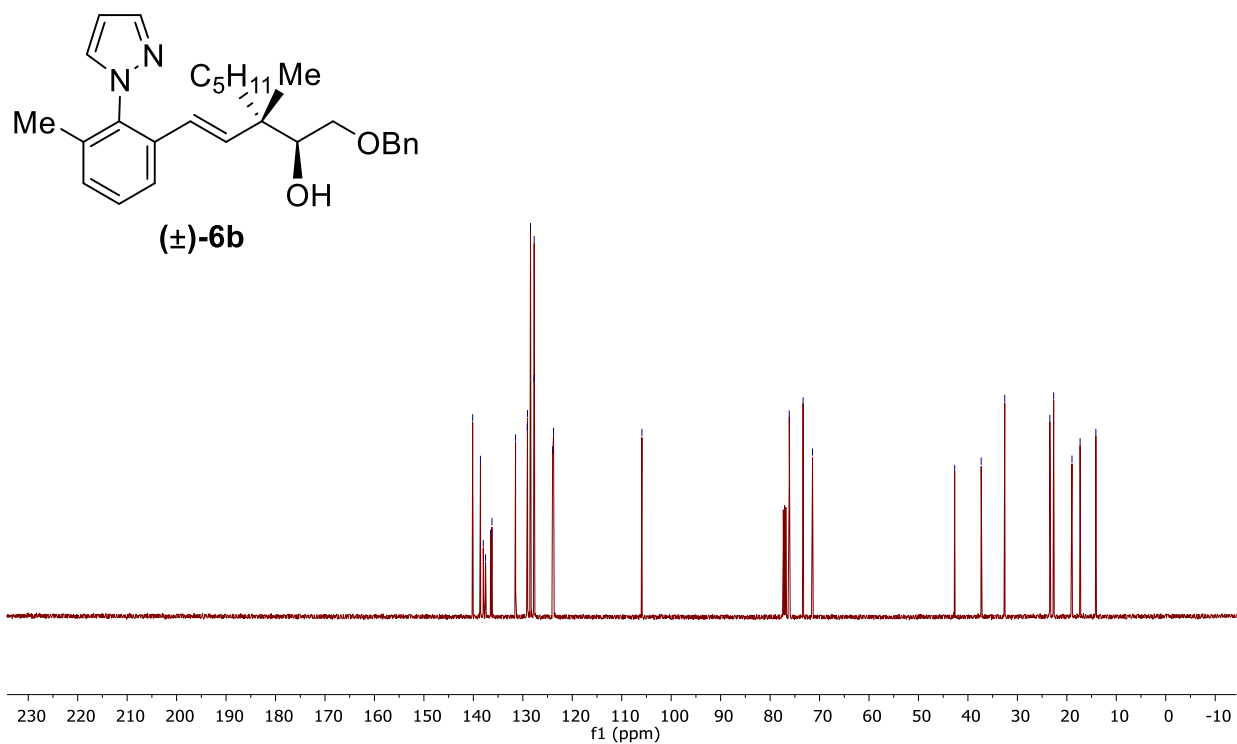

## SUPPORTING INFORMATION

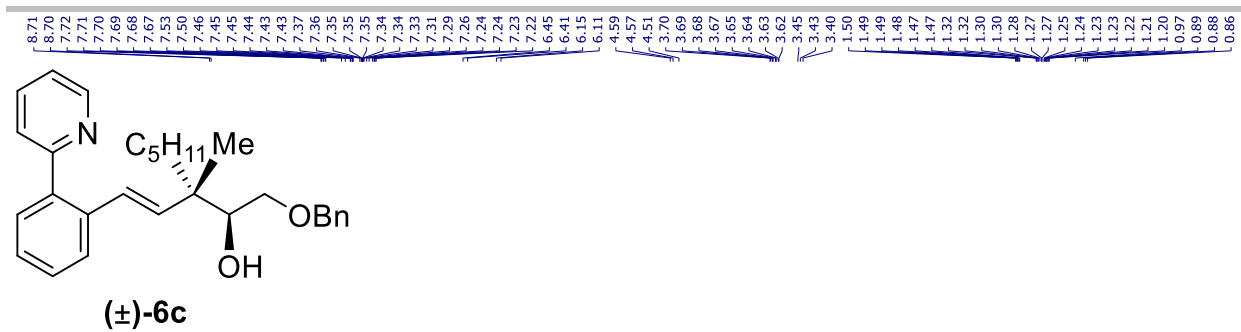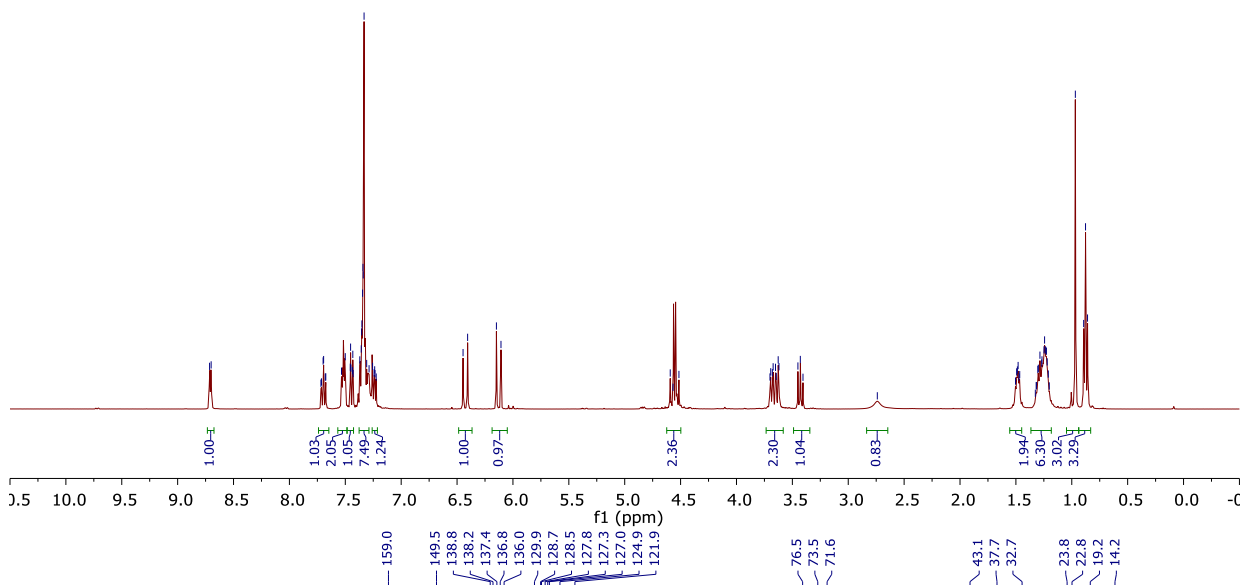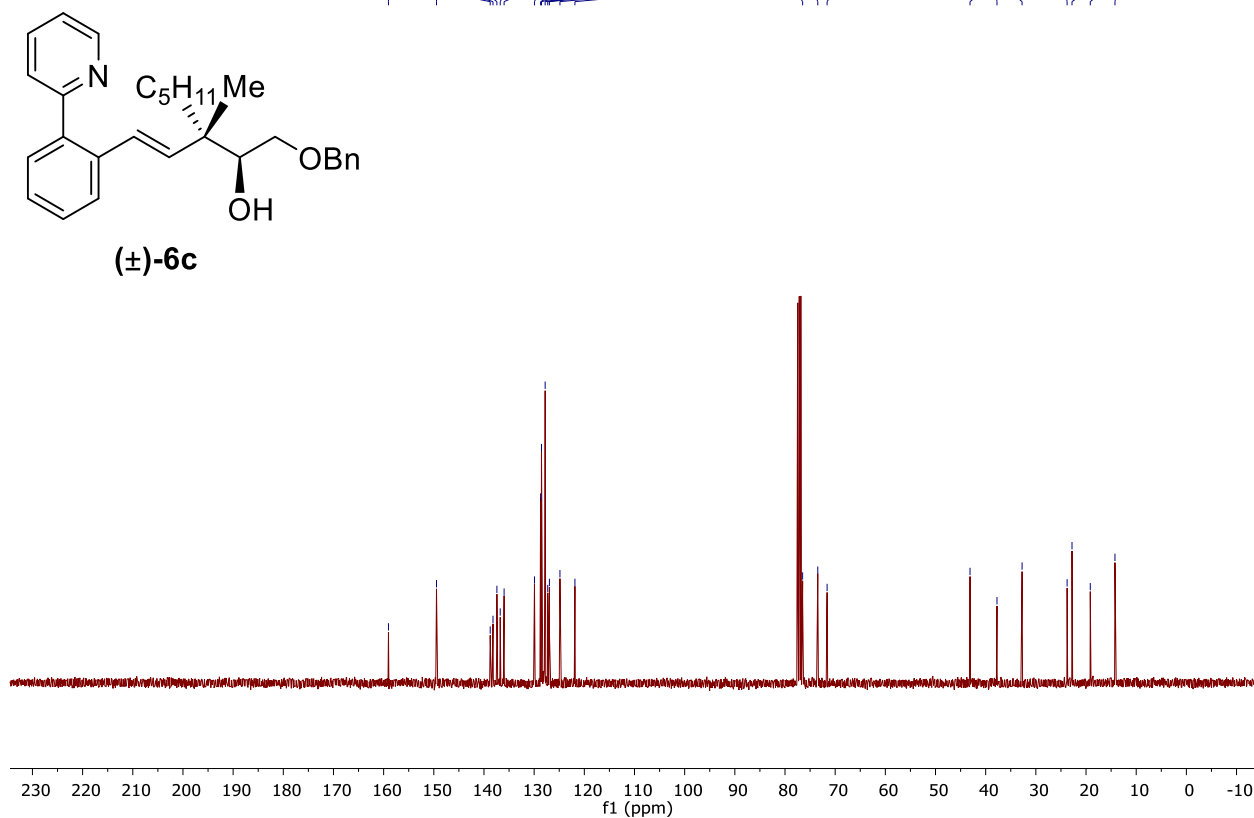

## SUPPORTING INFORMATION

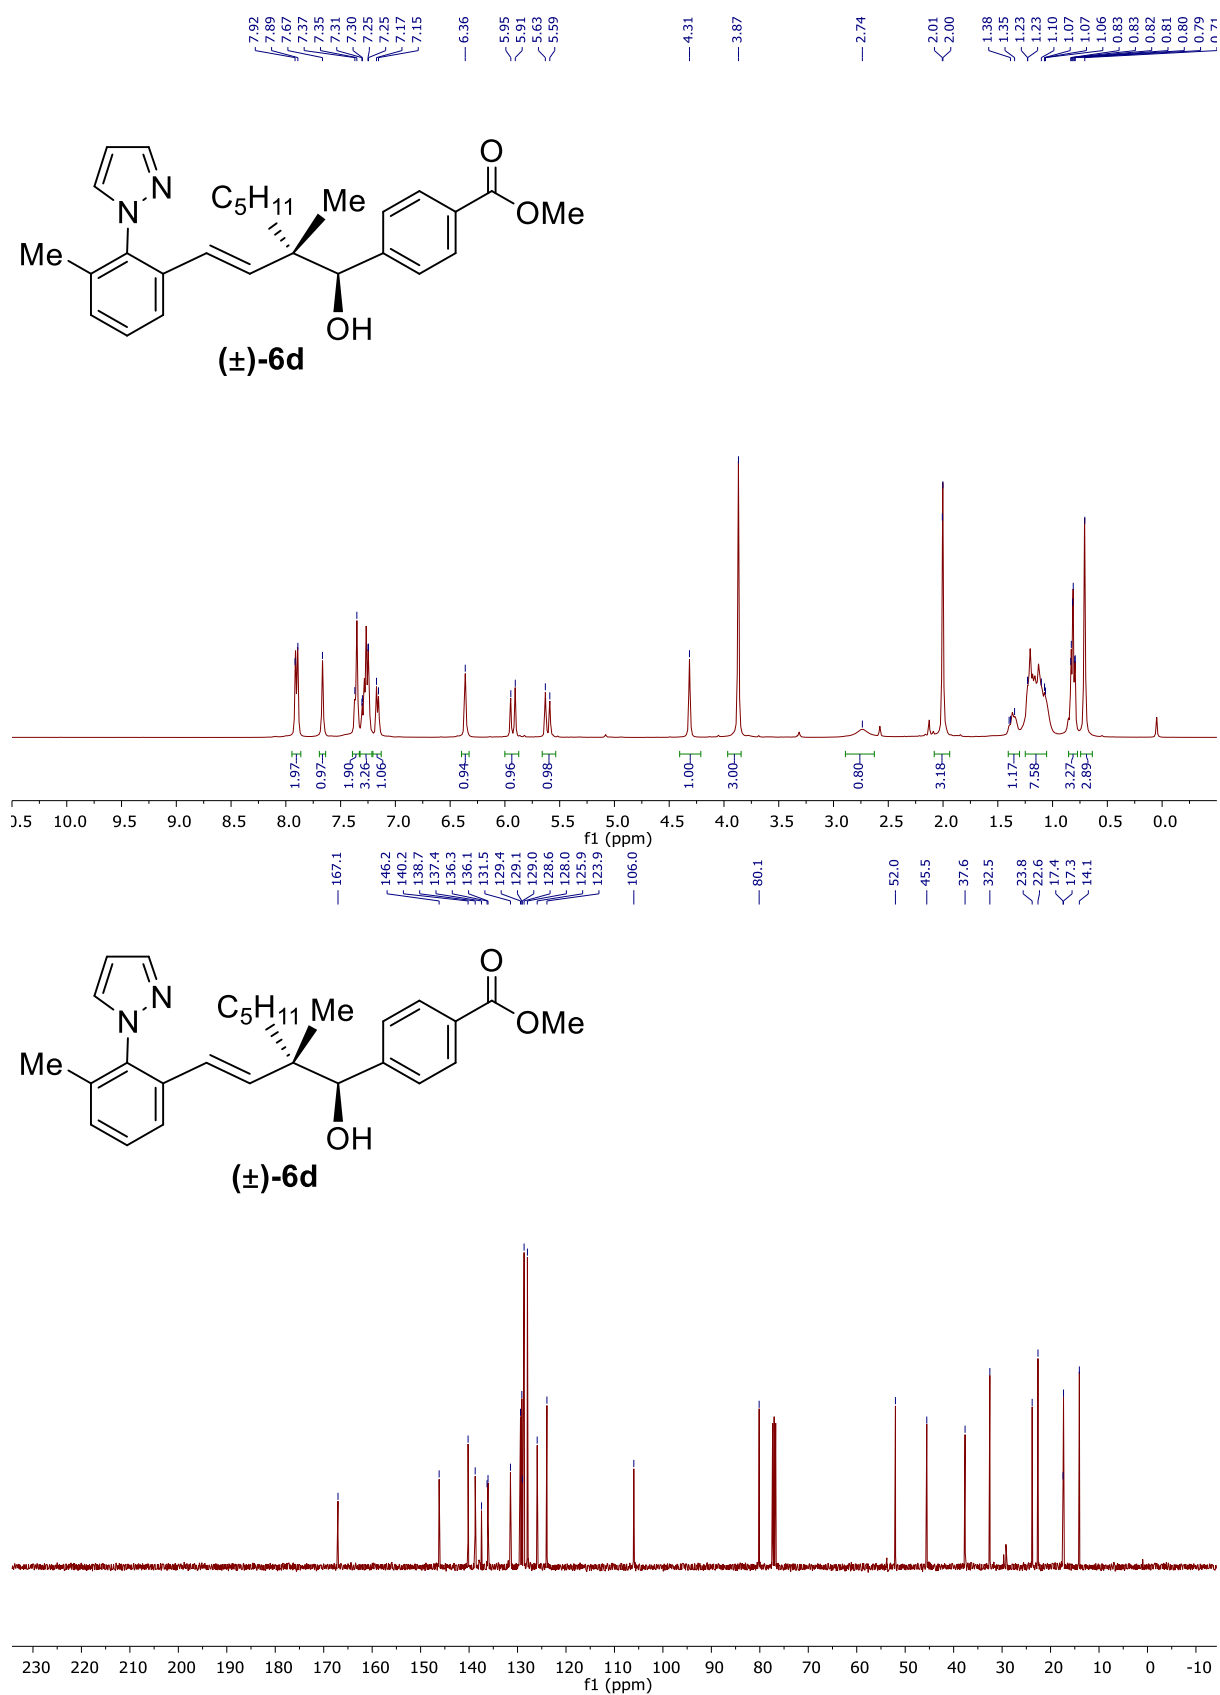

## SUPPORTING INFORMATION

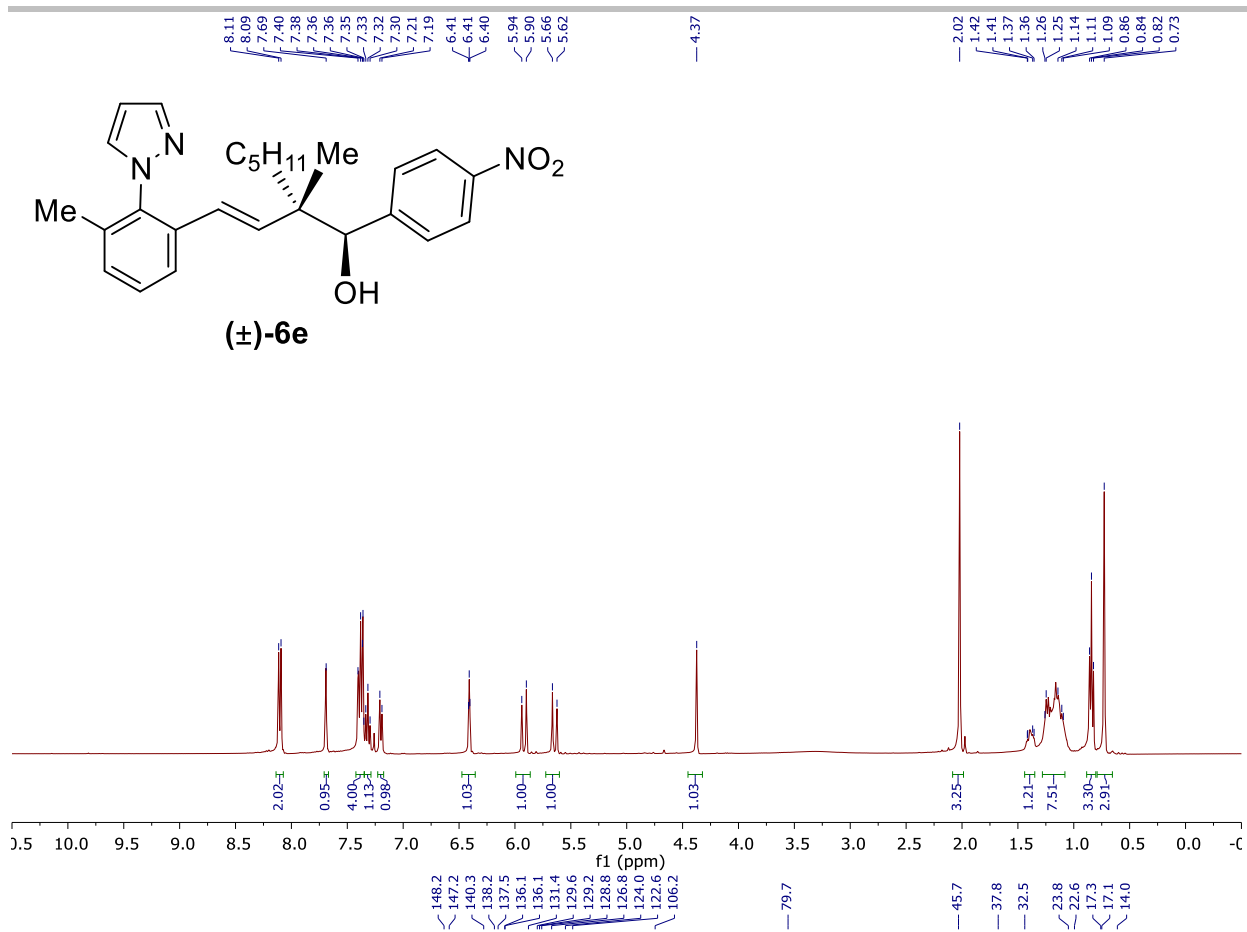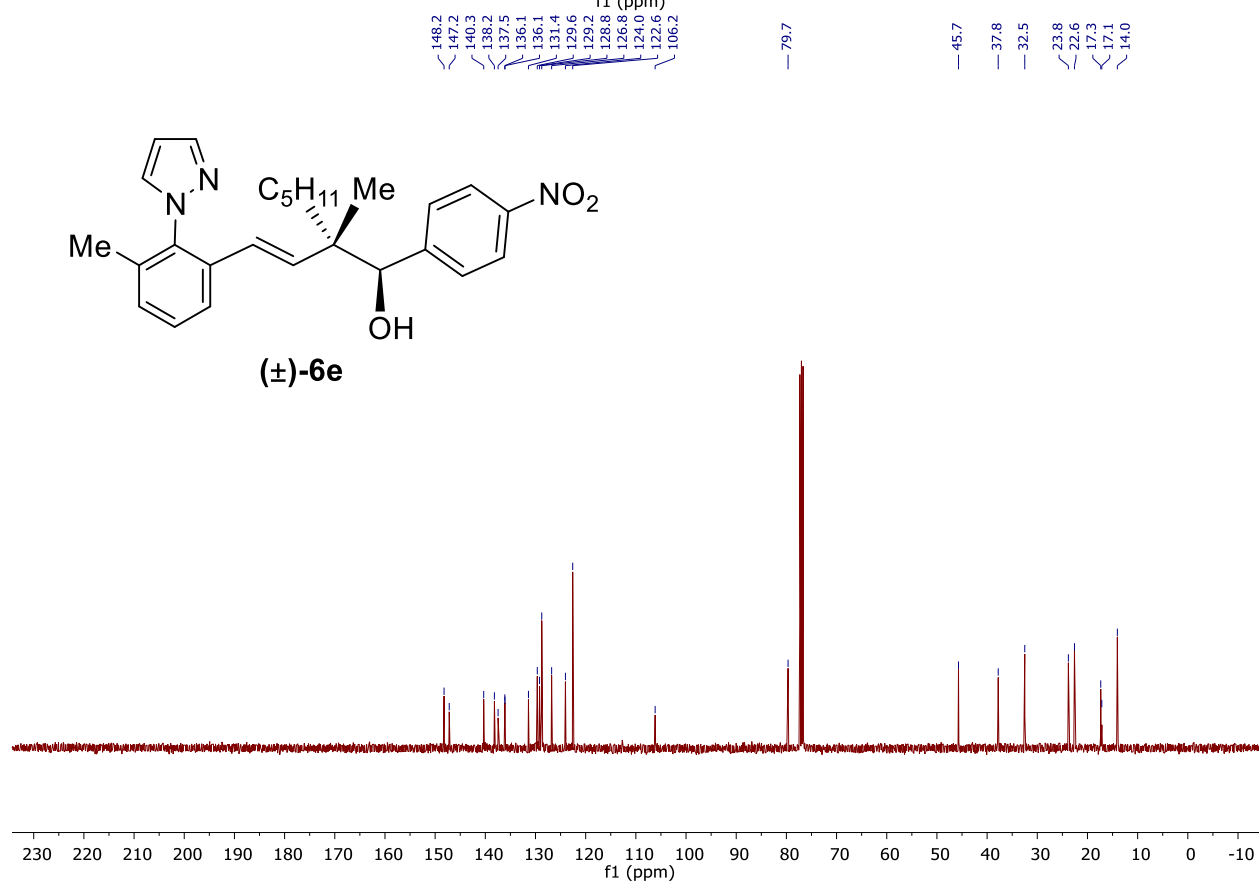

## SUPPORTING INFORMATION

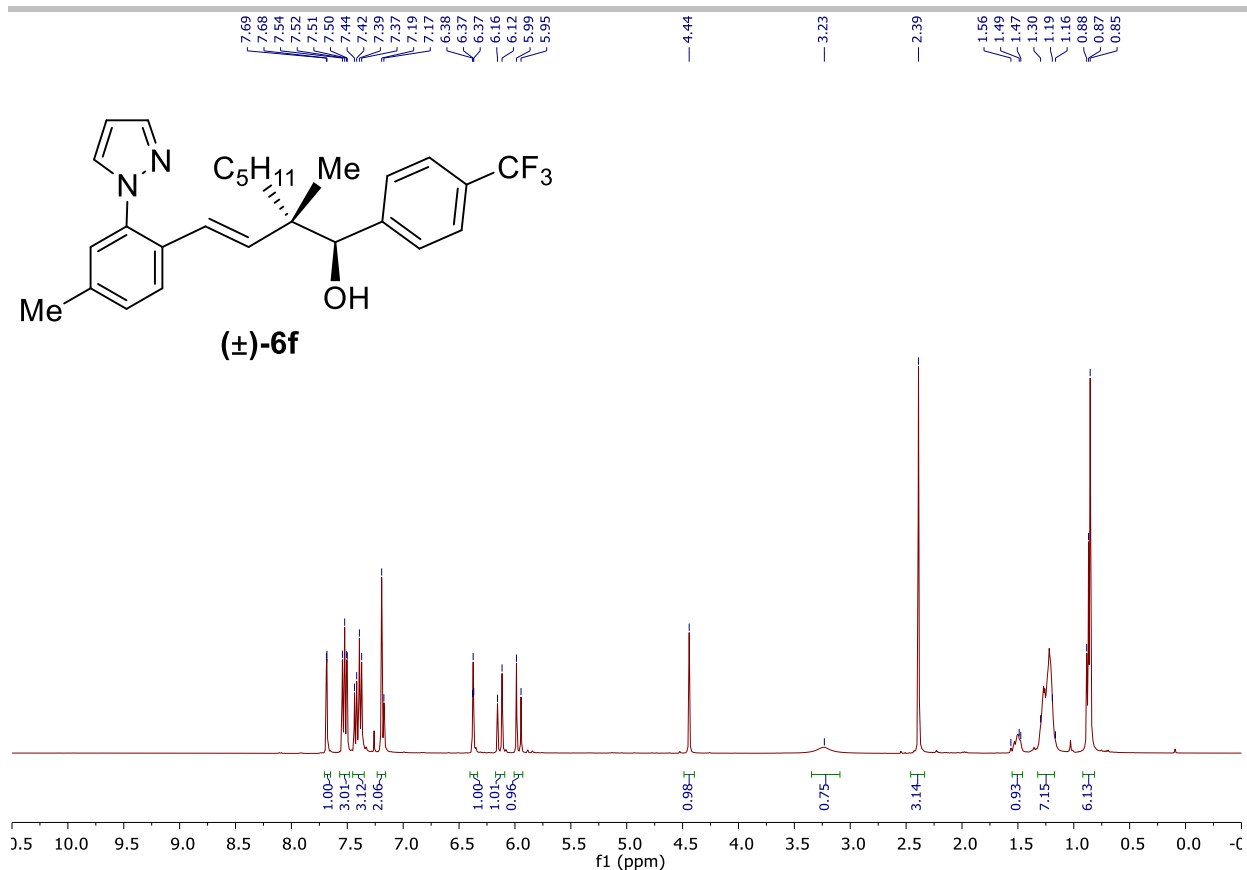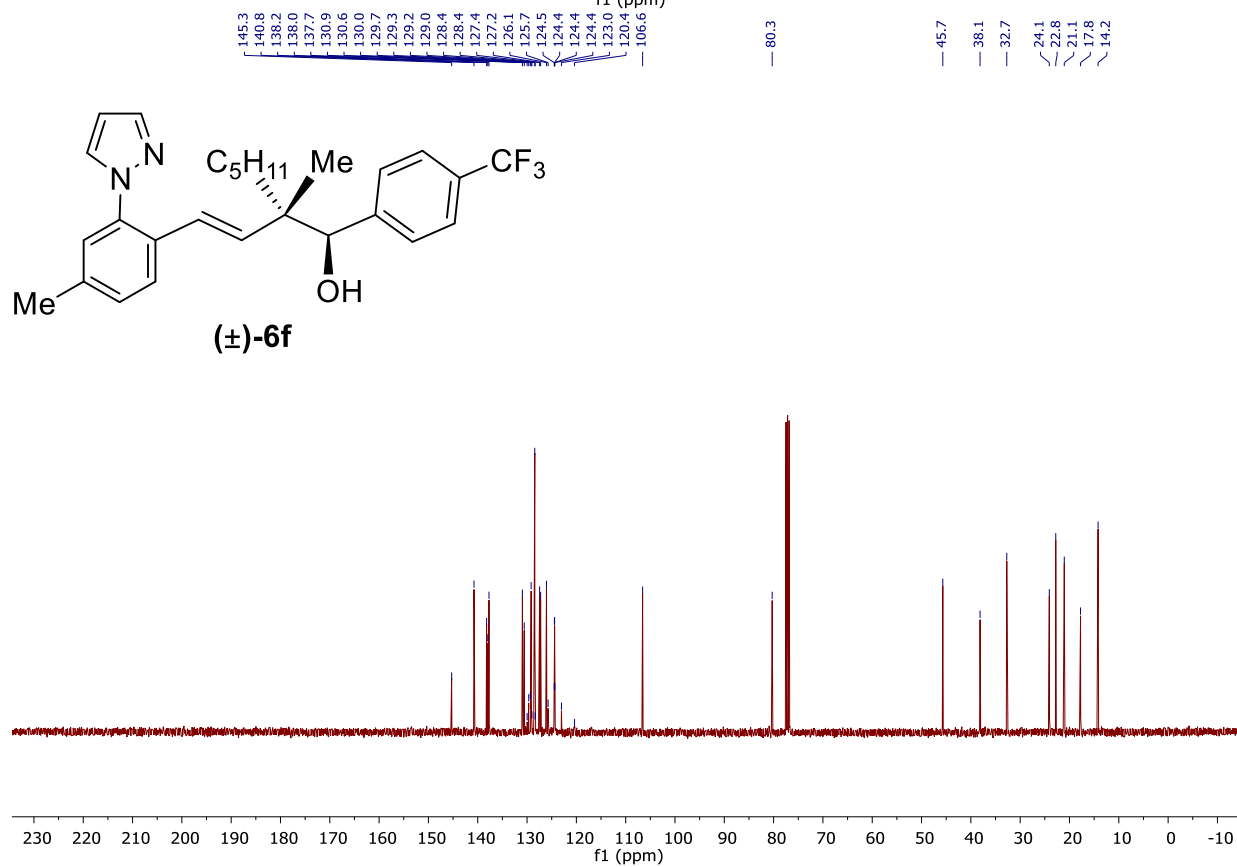

## SUPPORTING INFORMATION

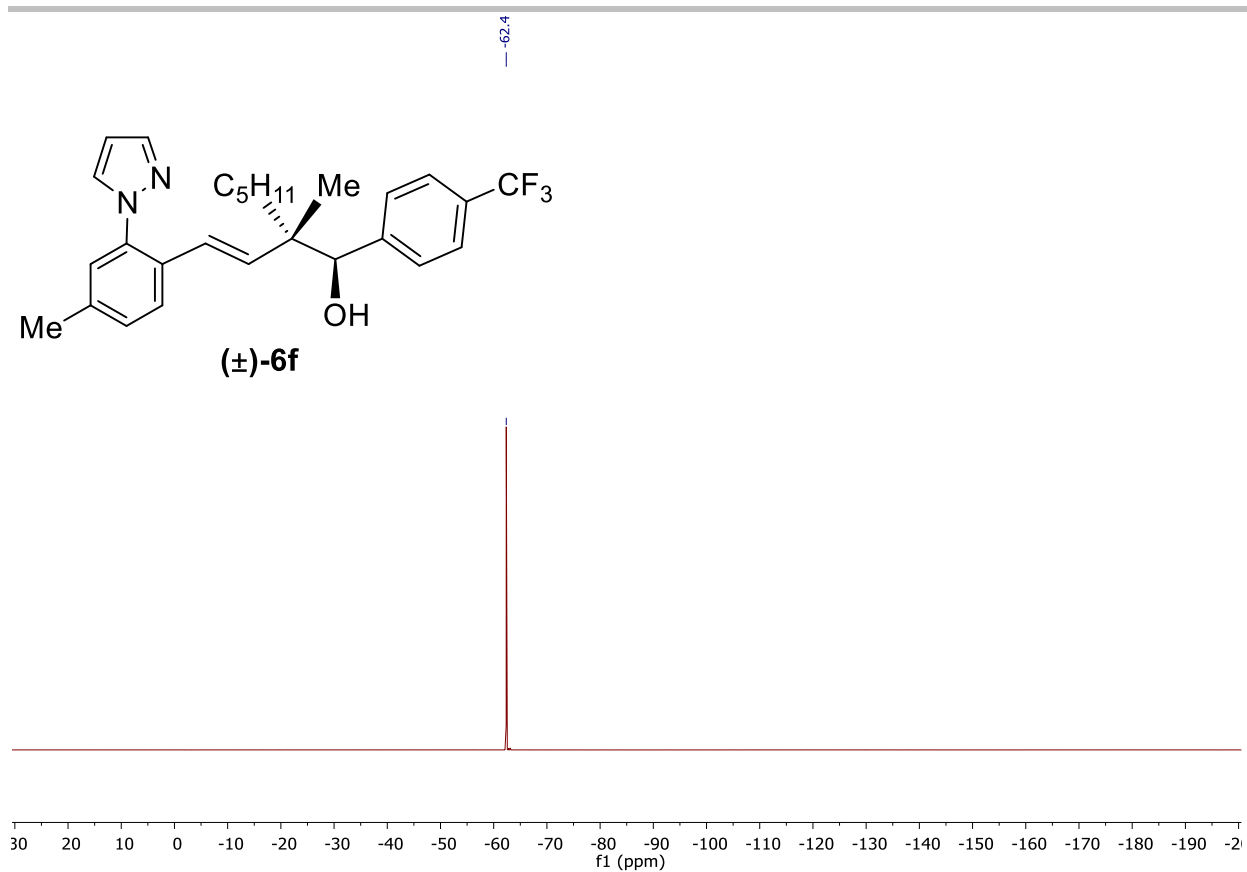



## SUPPORTING INFORMATION

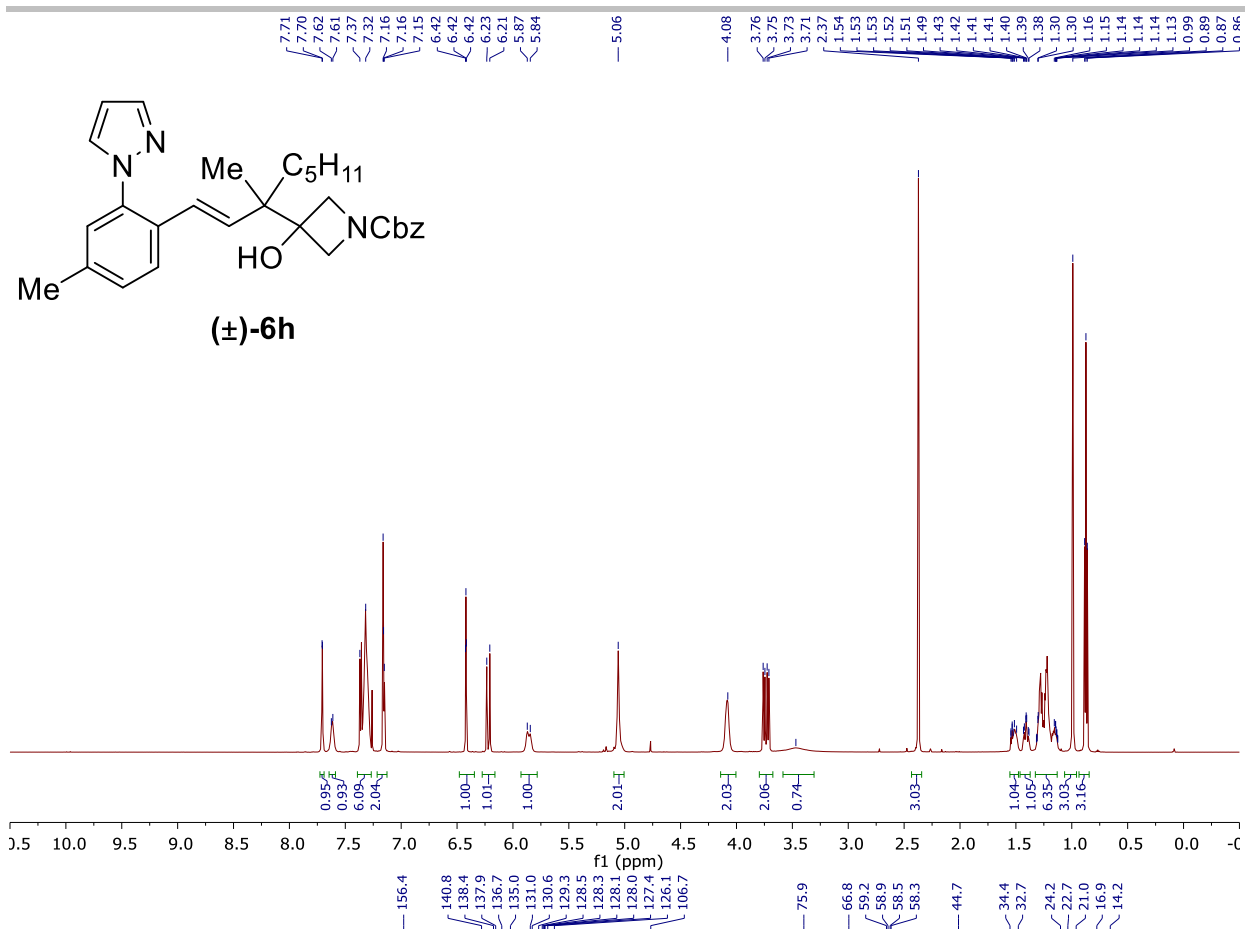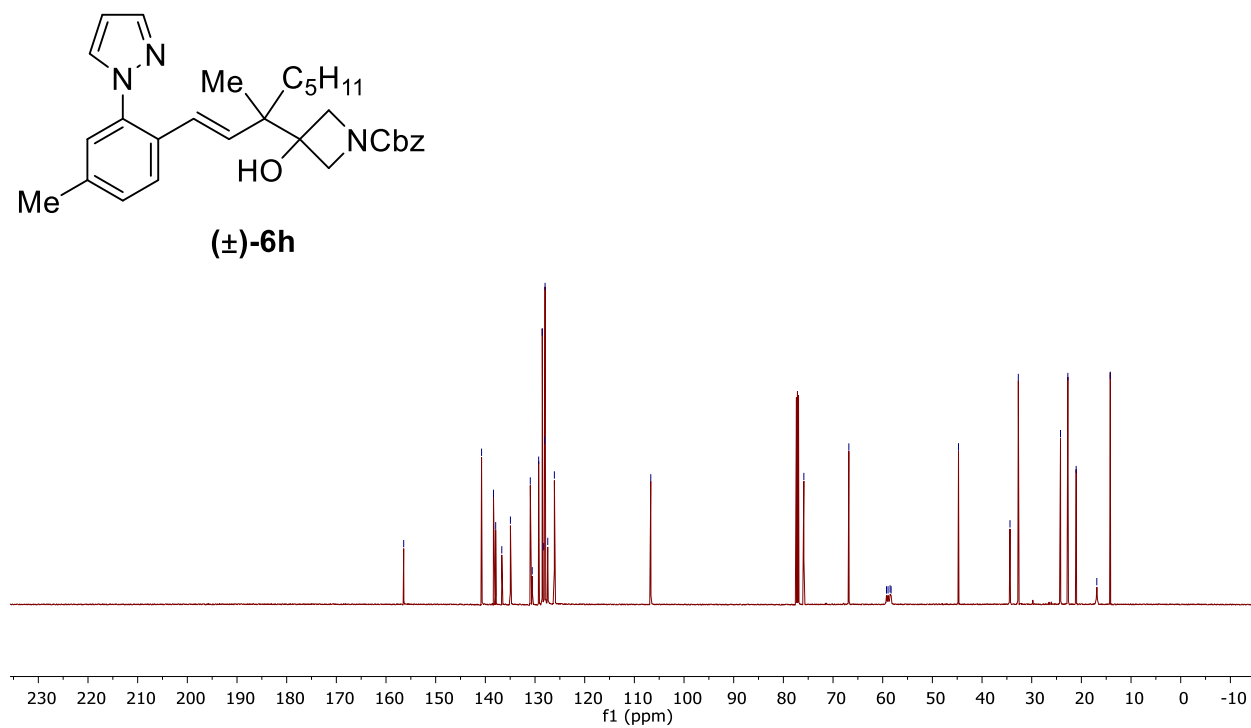



## SUPPORTING INFORMATION

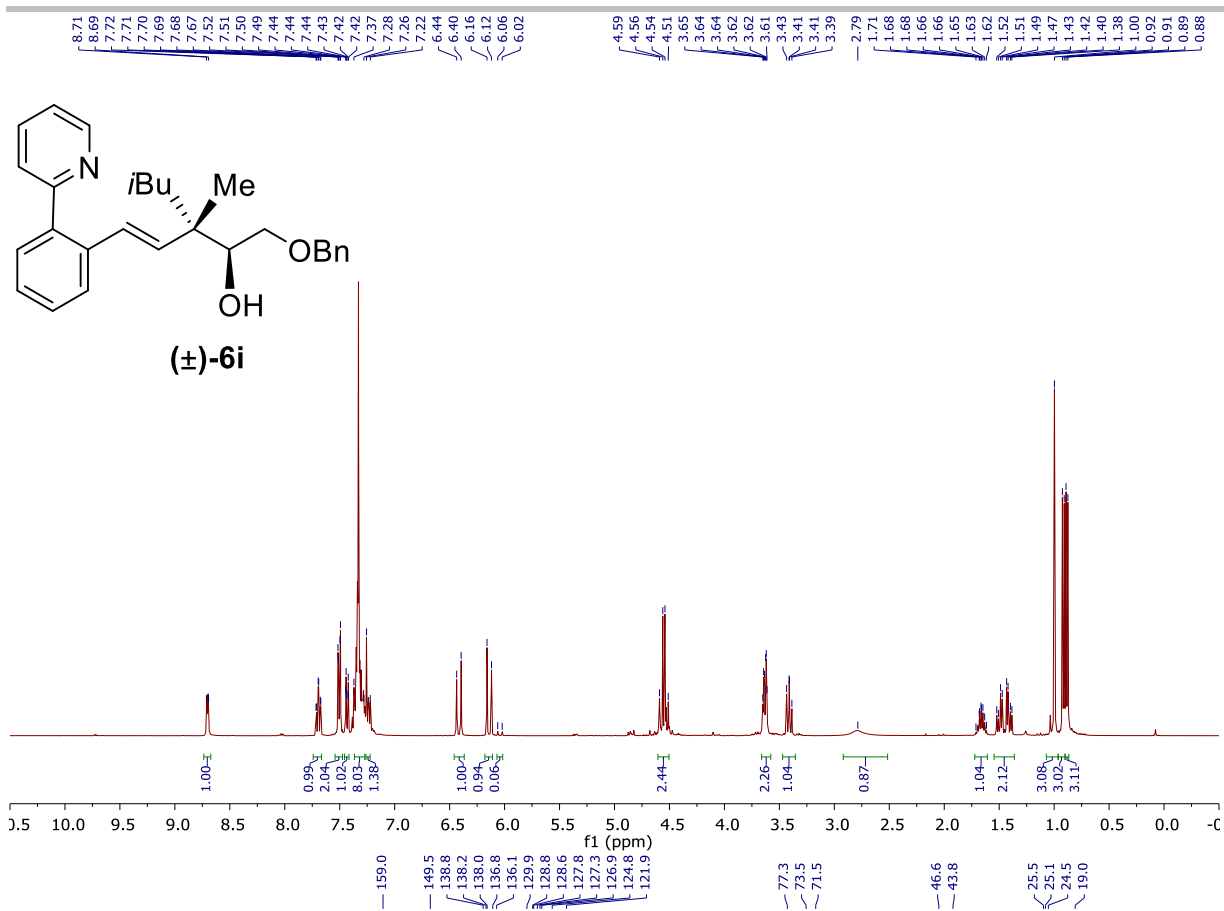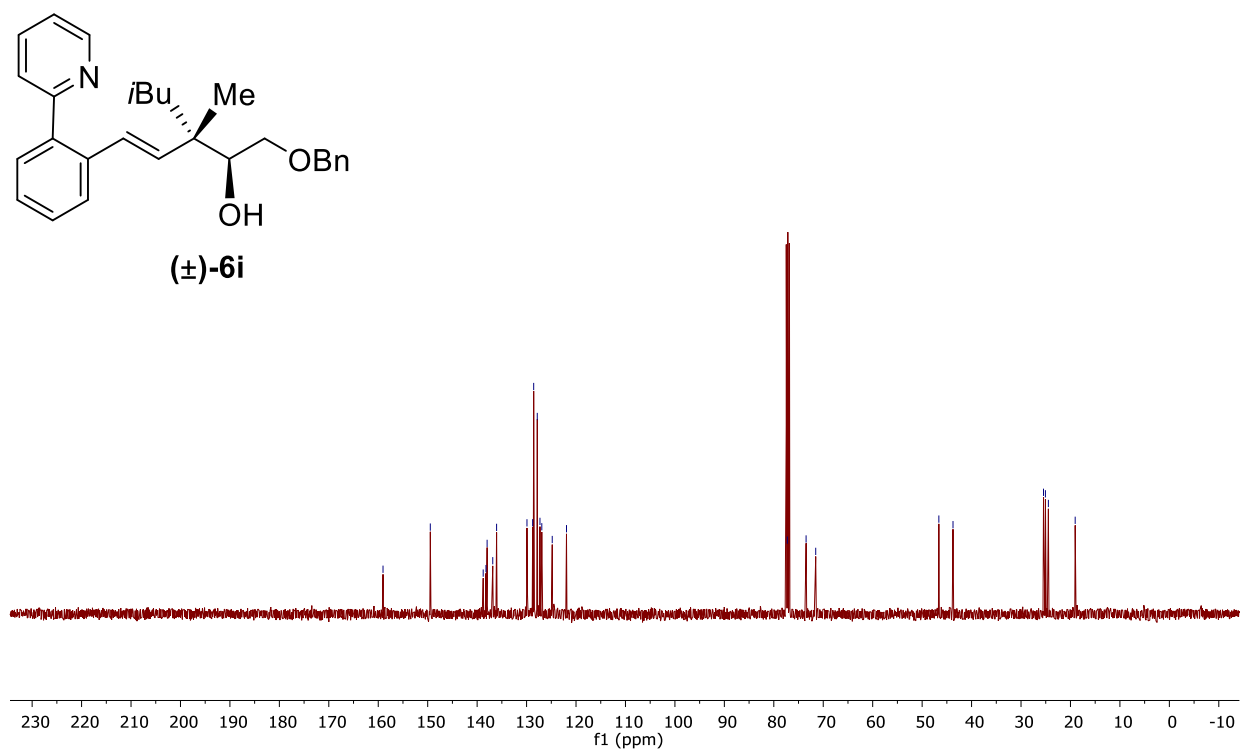

## SUPPORTING INFORMATION

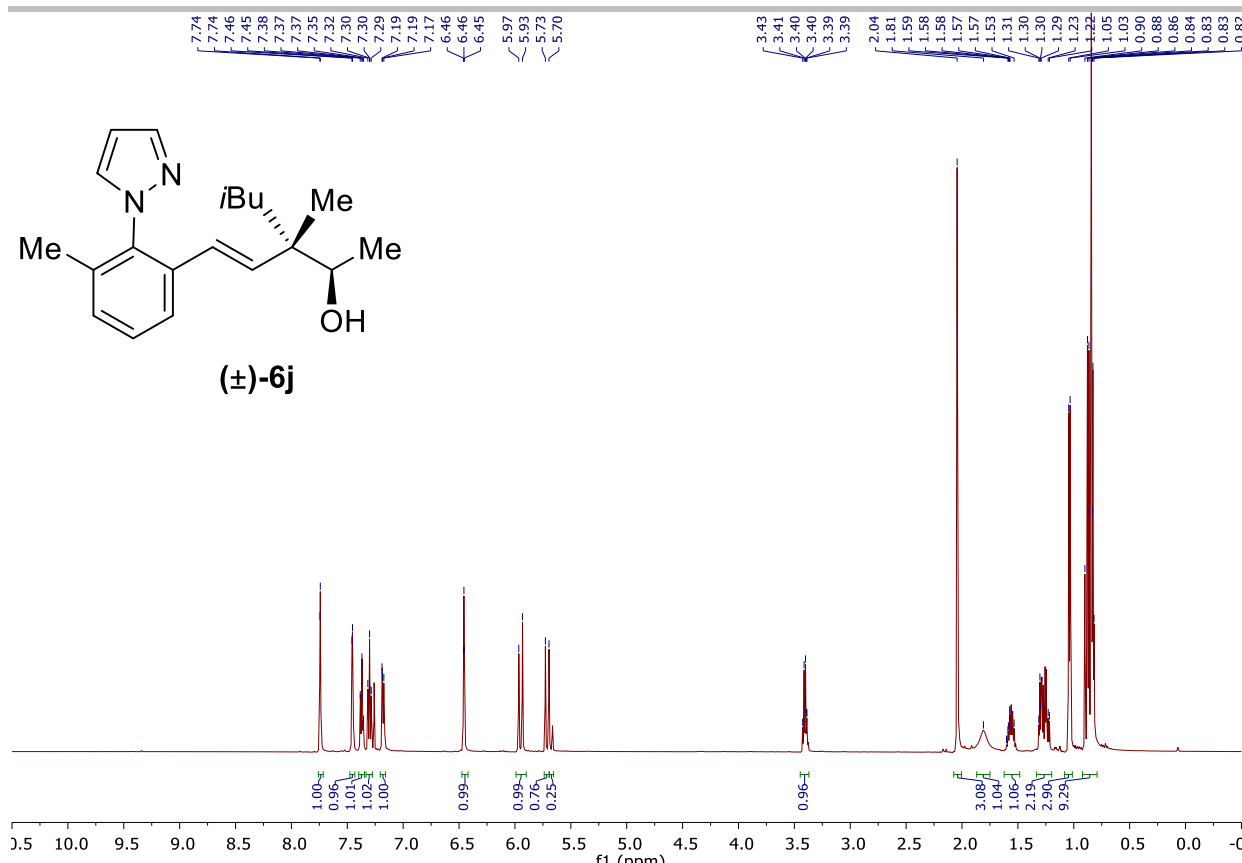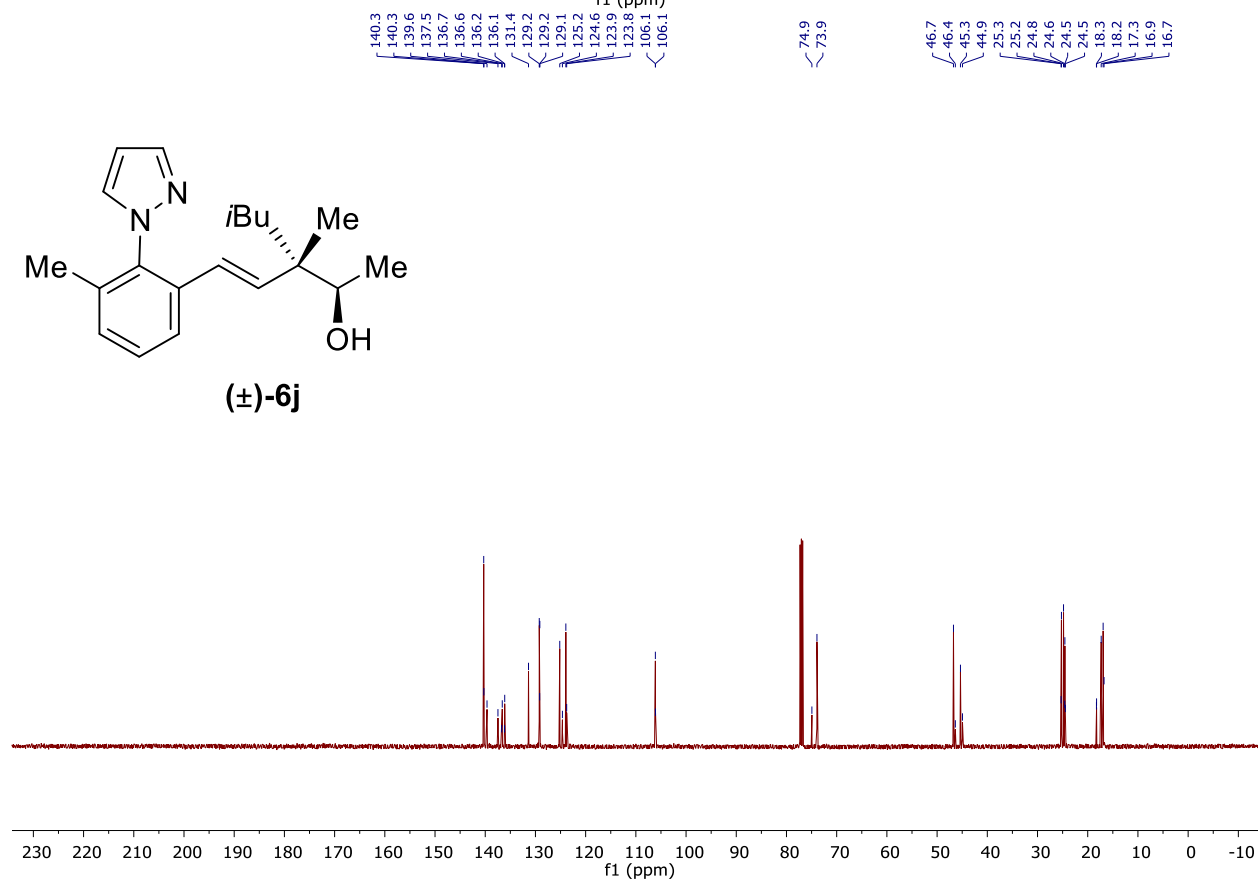

## SUPPORTING INFORMATION

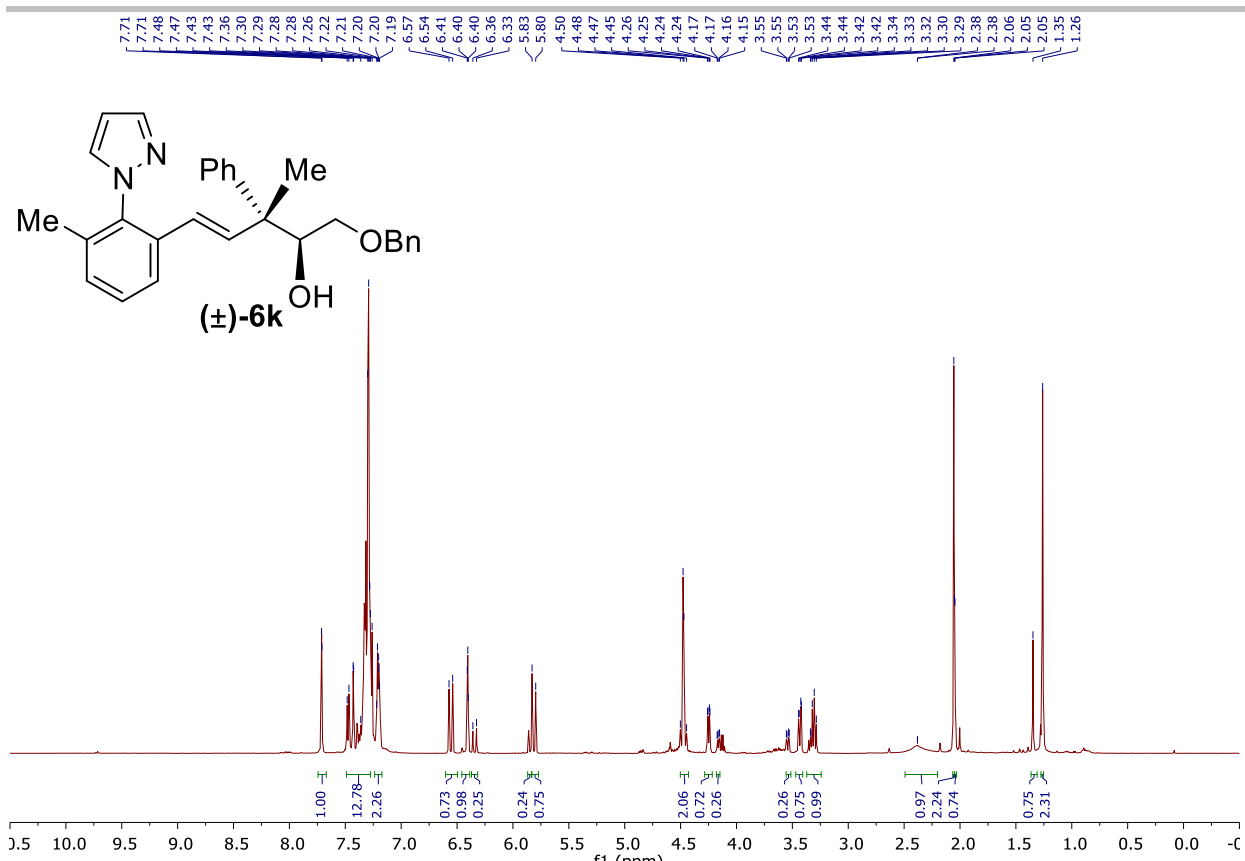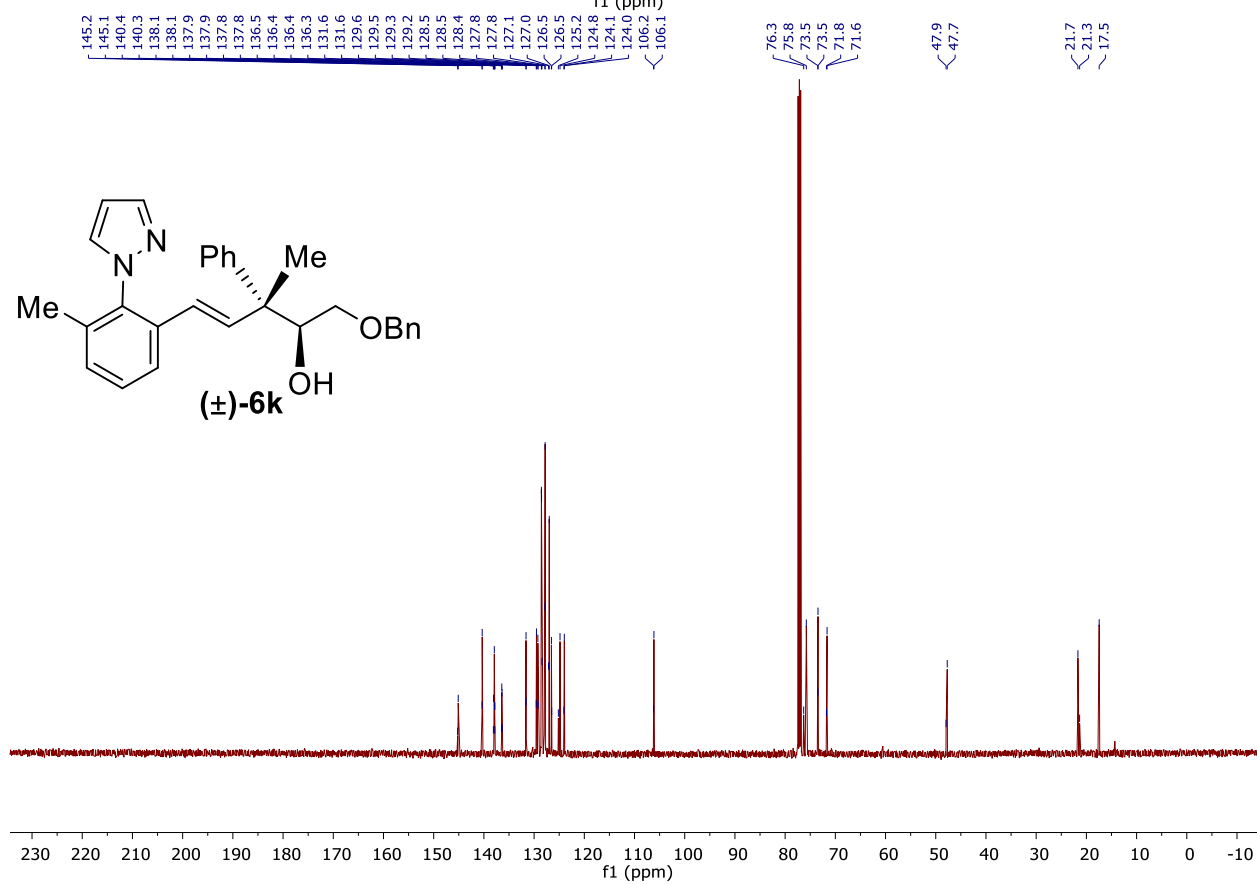

## SUPPORTING INFORMATION

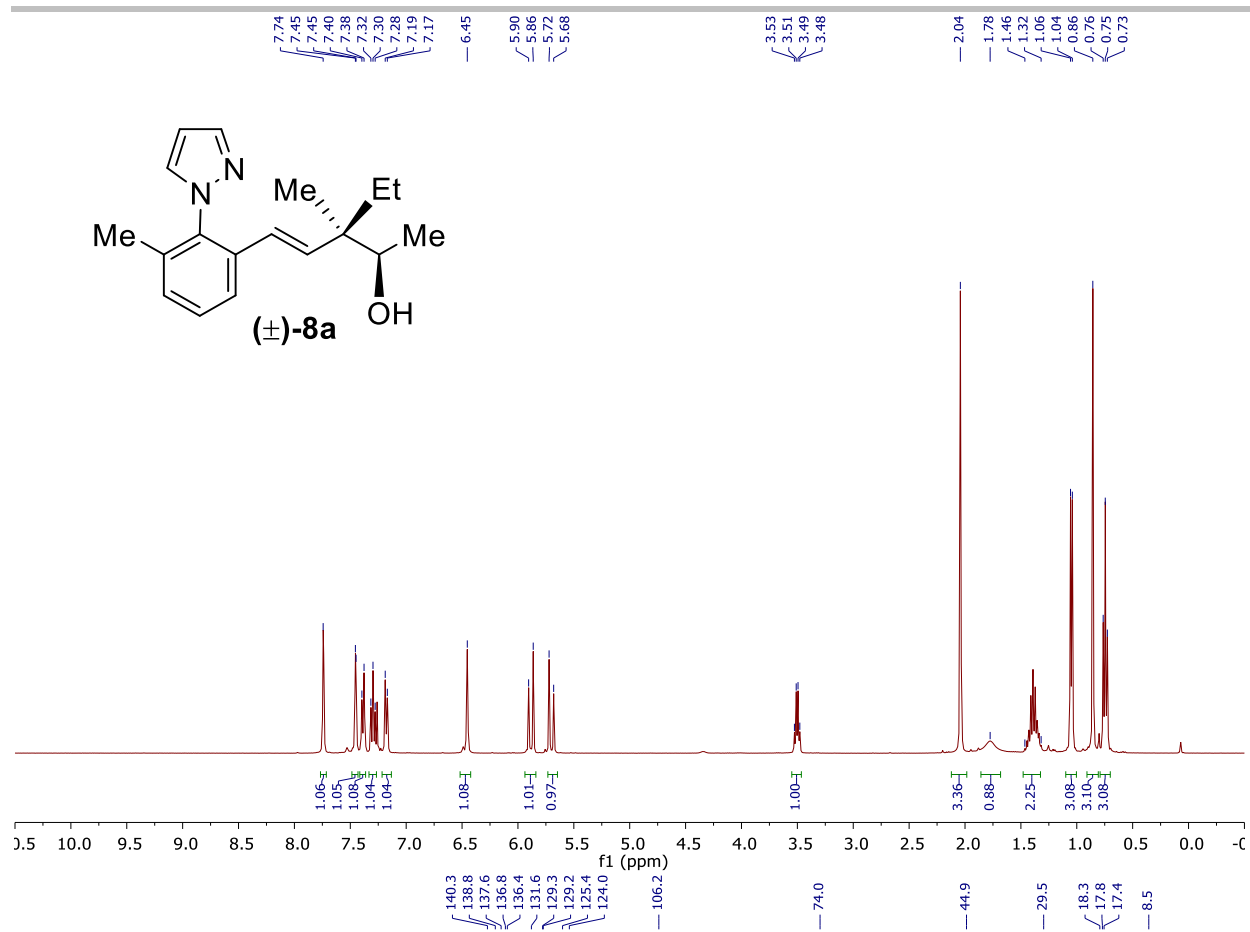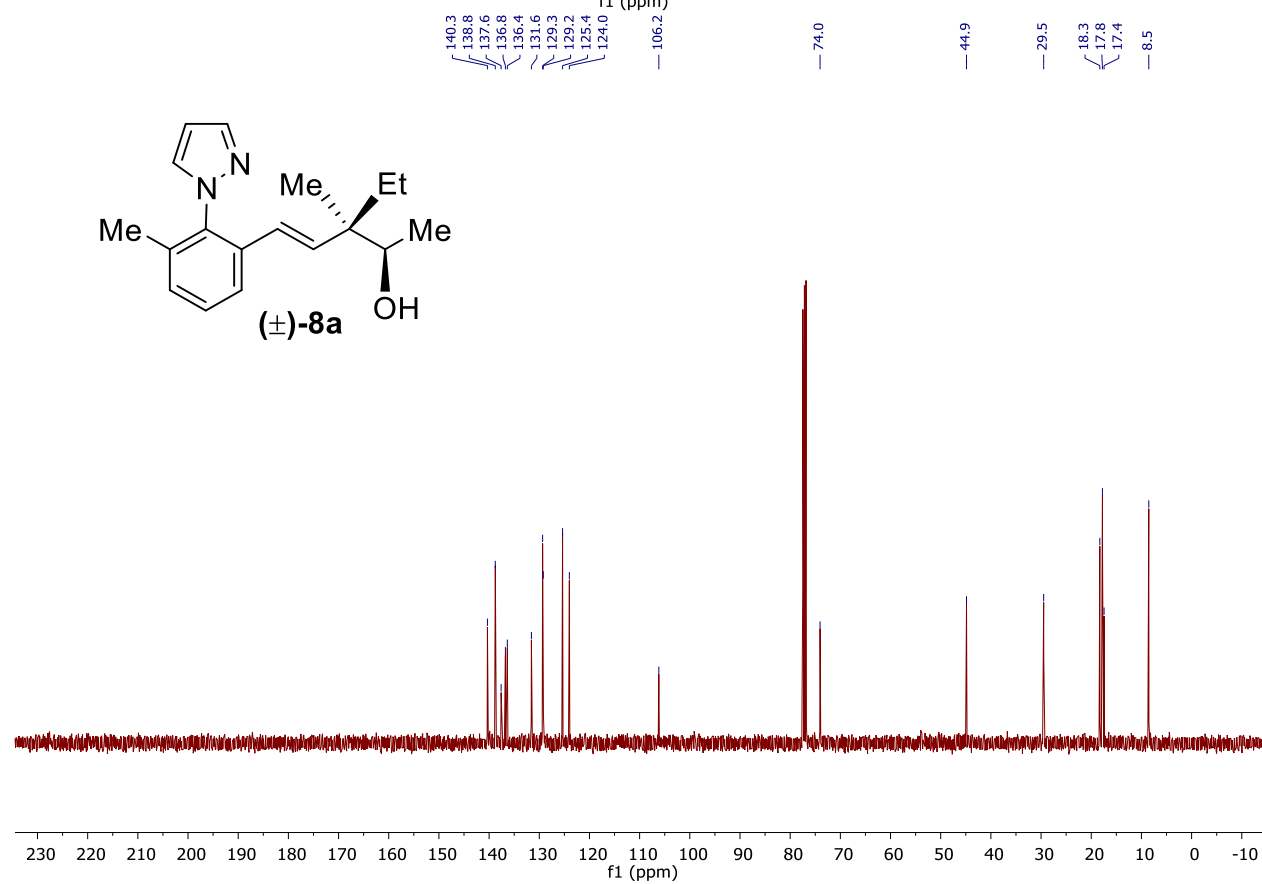

## SUPPORTING INFORMATION

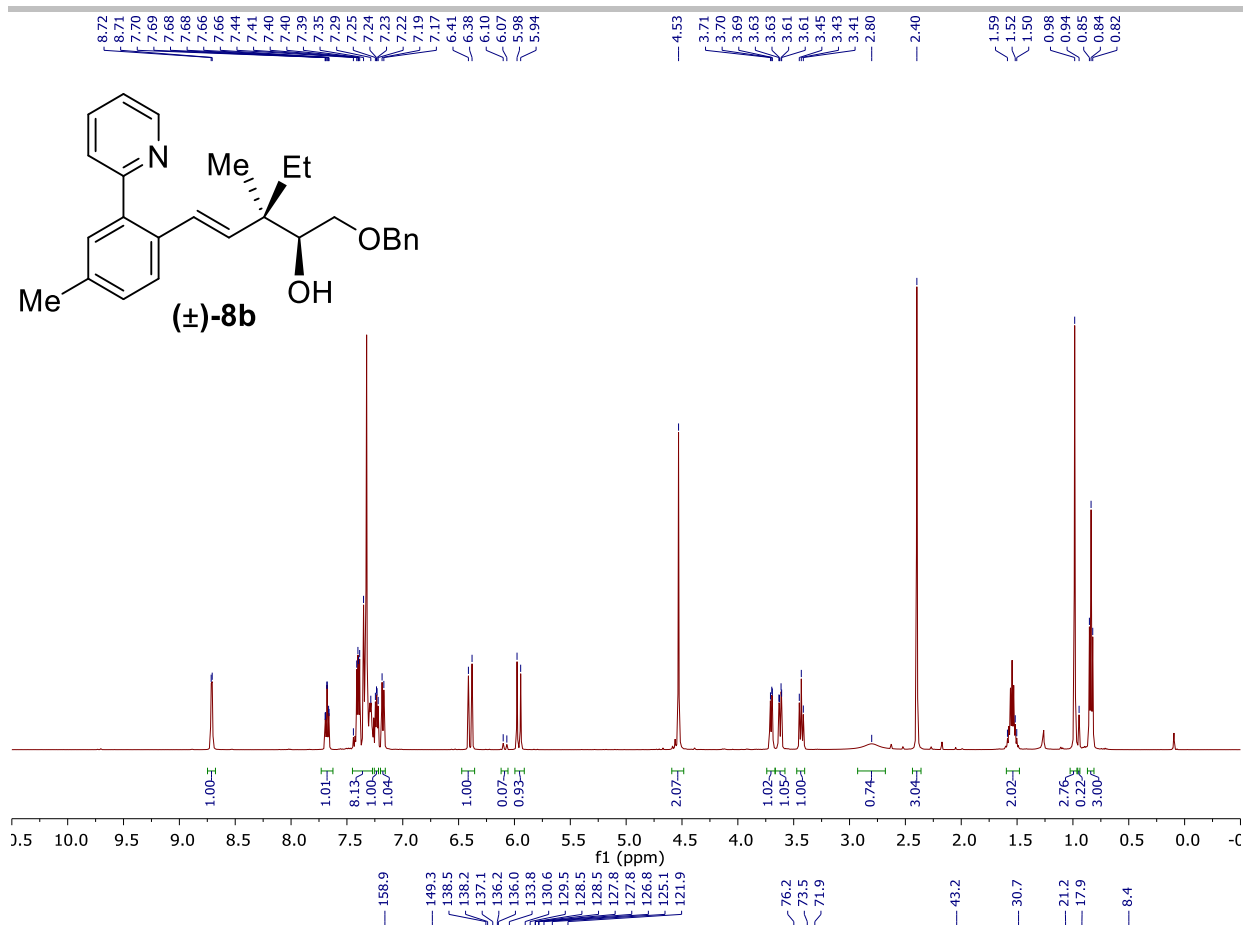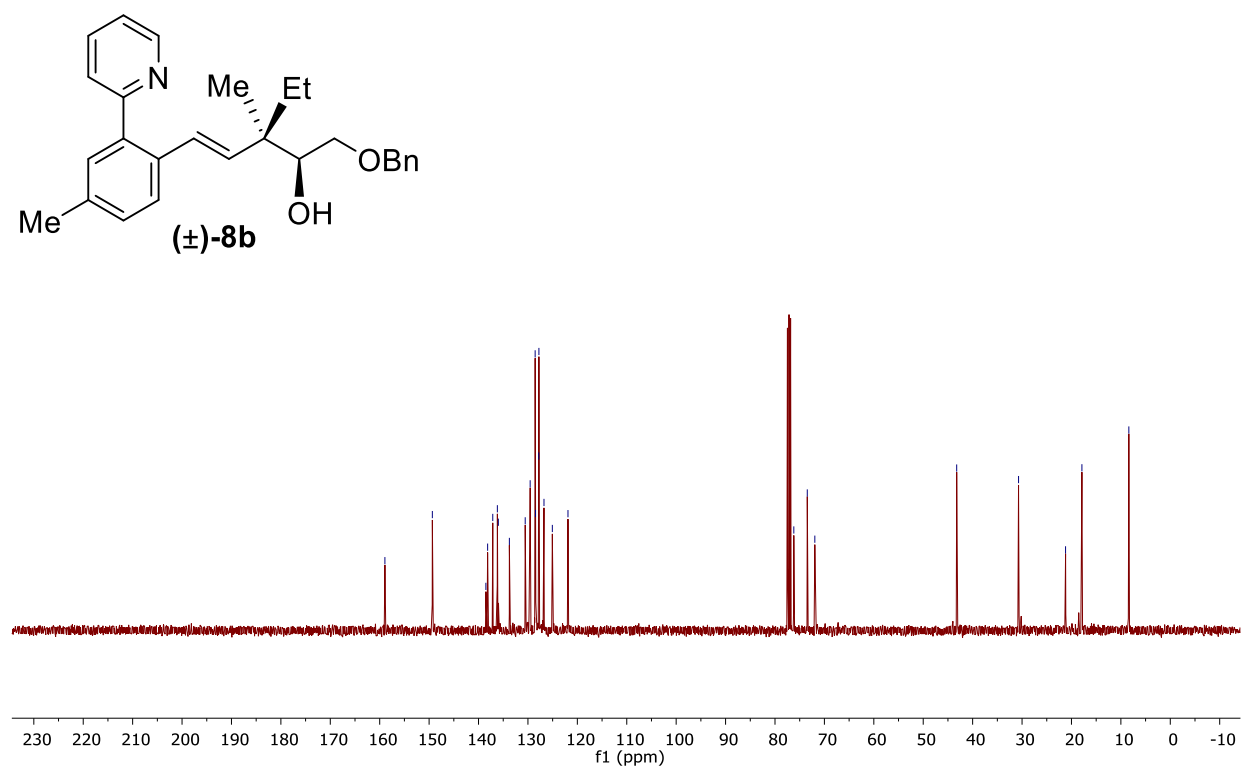

## SUPPORTING INFORMATION

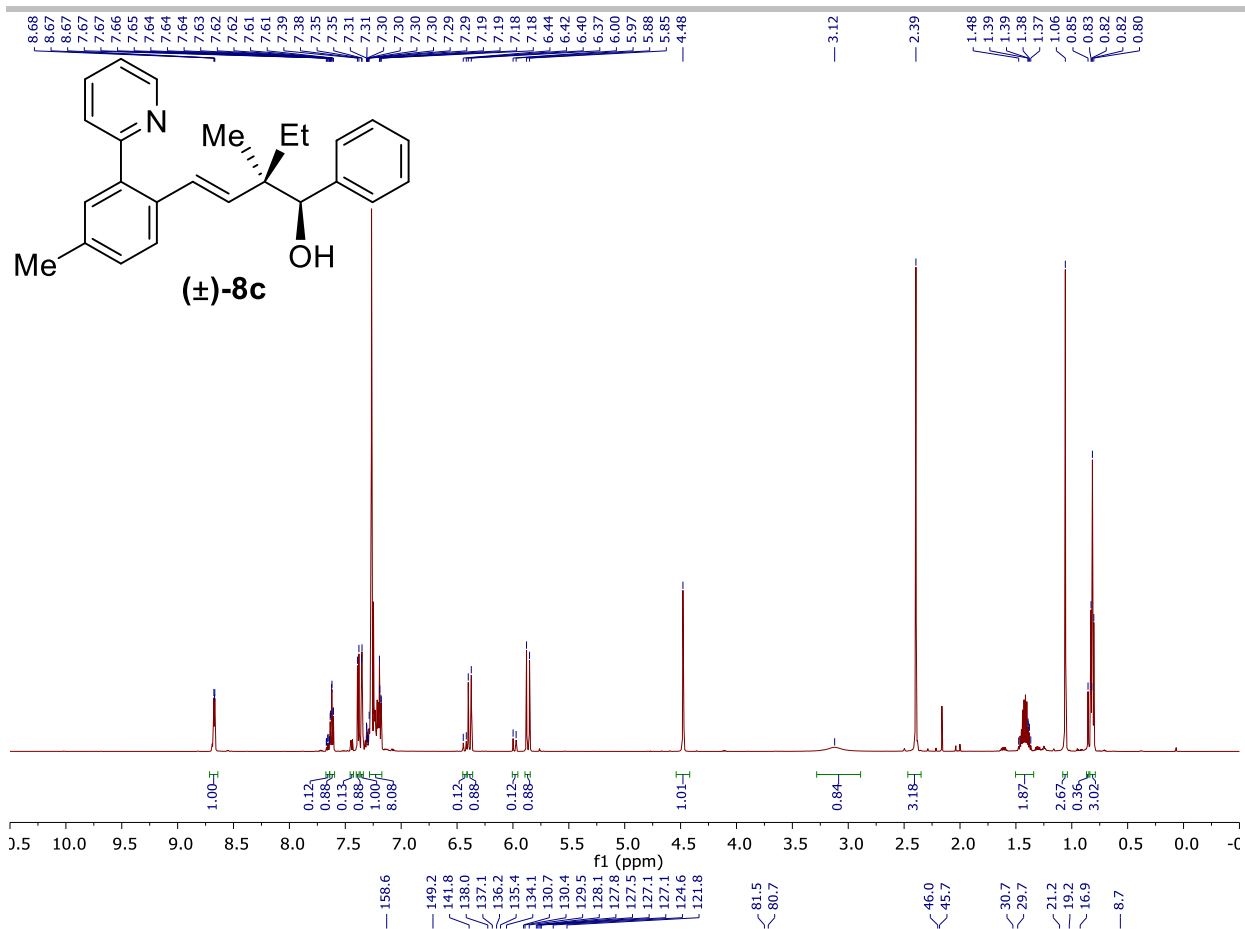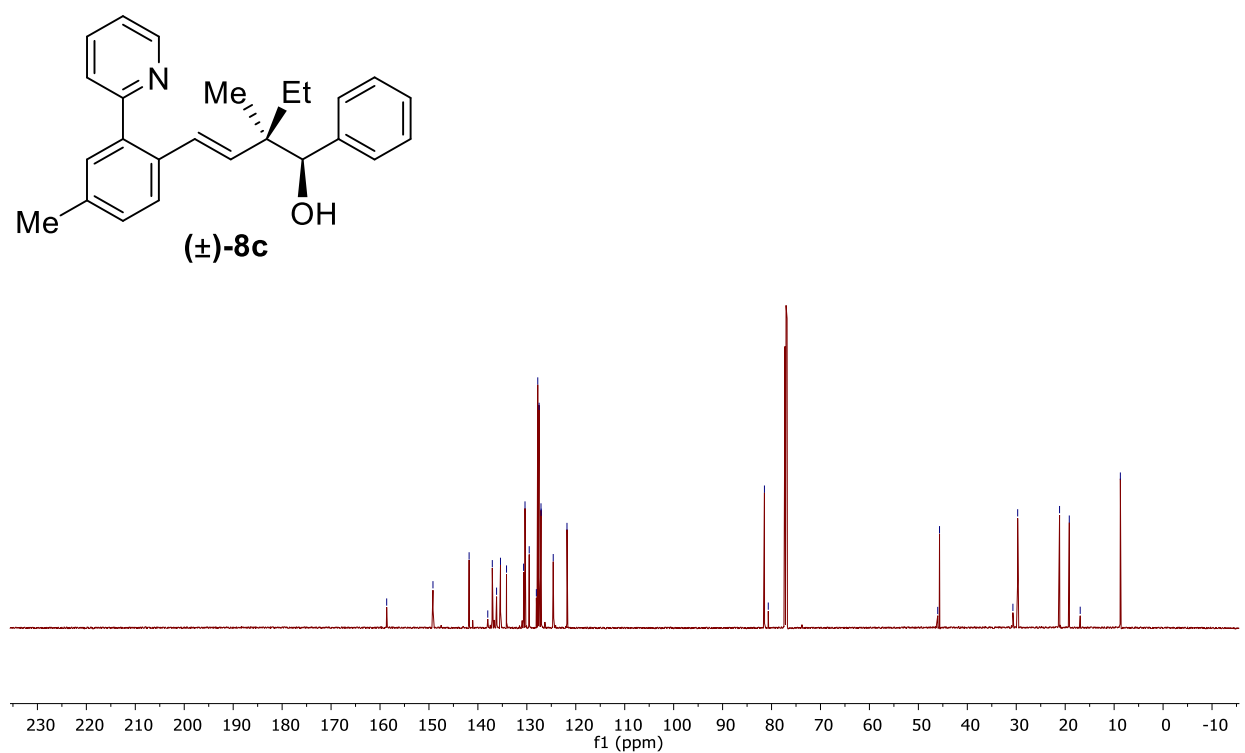

## SUPPORTING INFORMATION

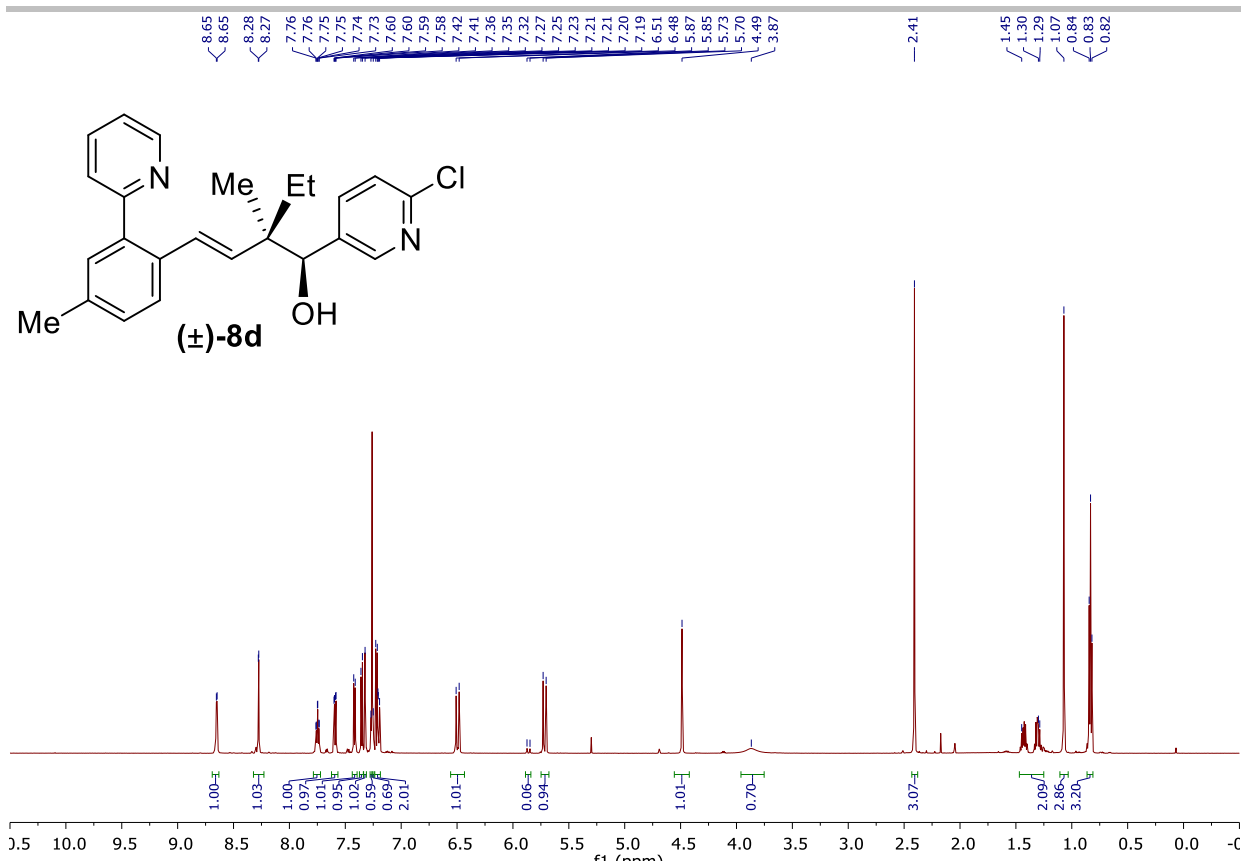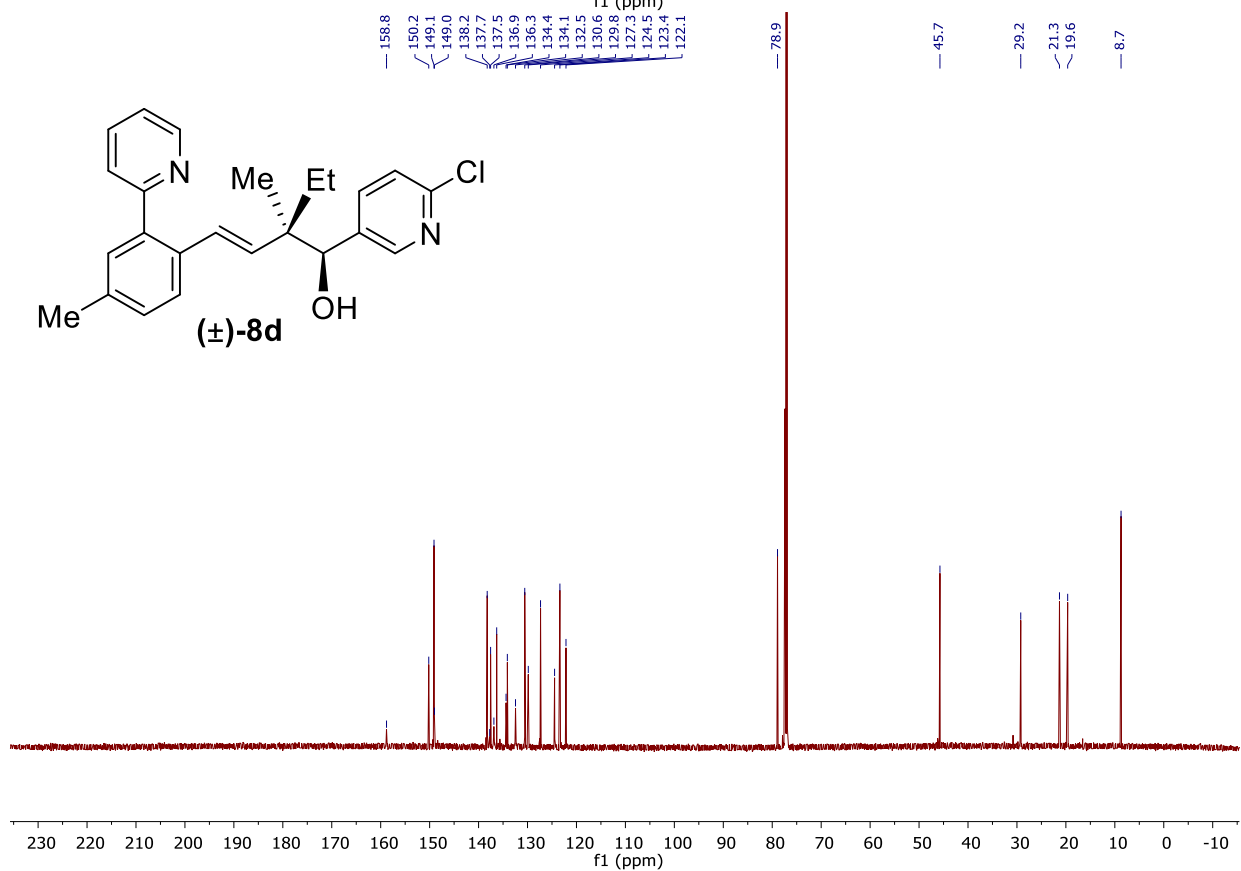

## SUPPORTING INFORMATION

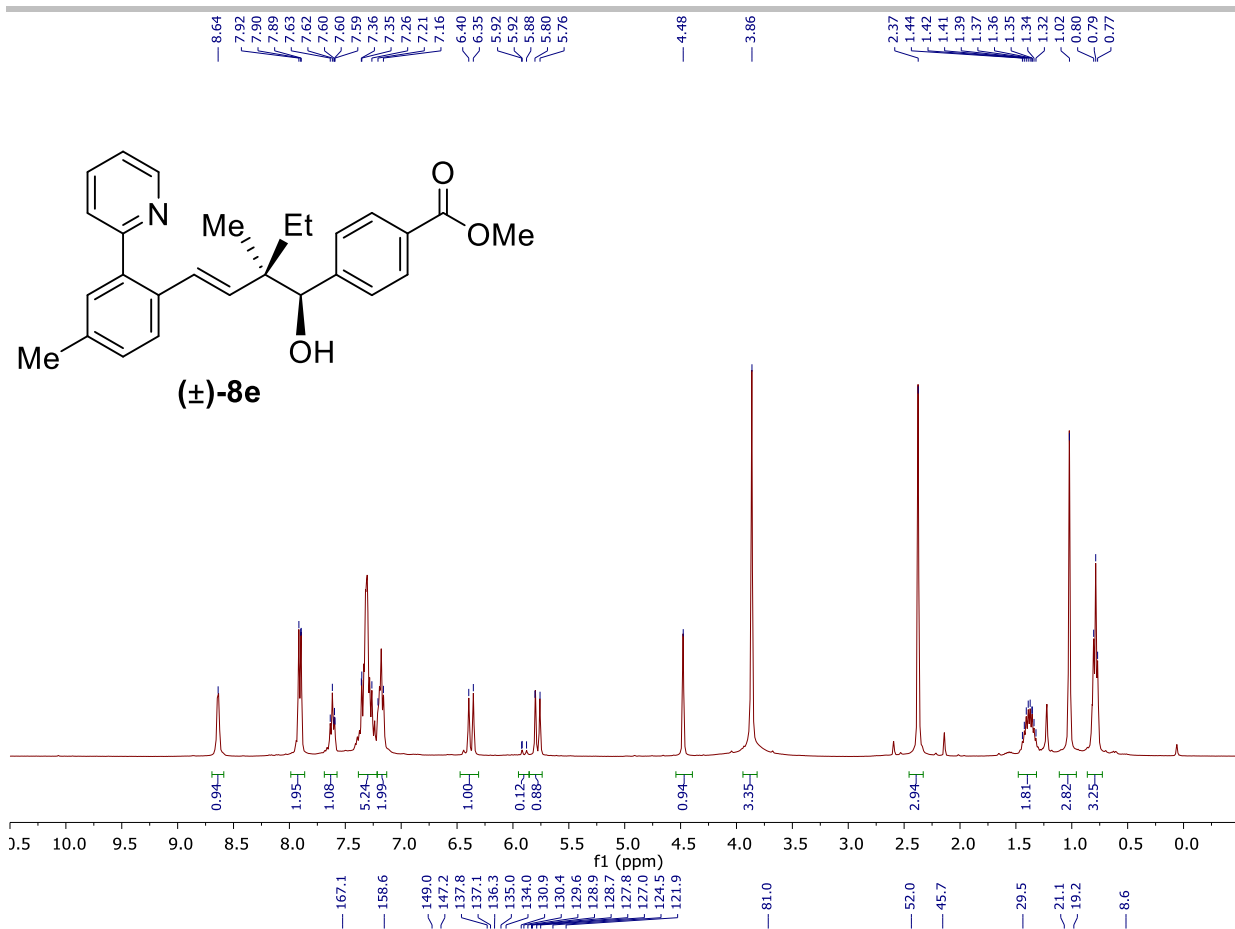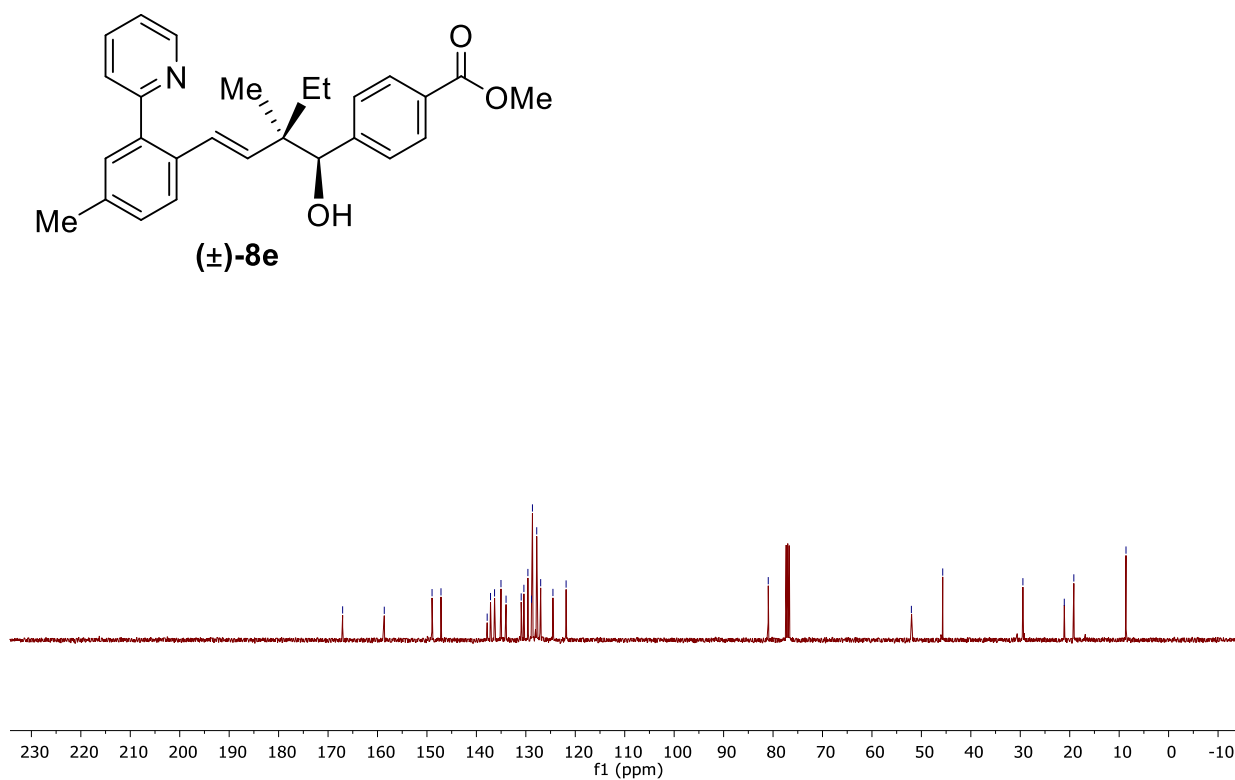



## SUPPORTING INFORMATION

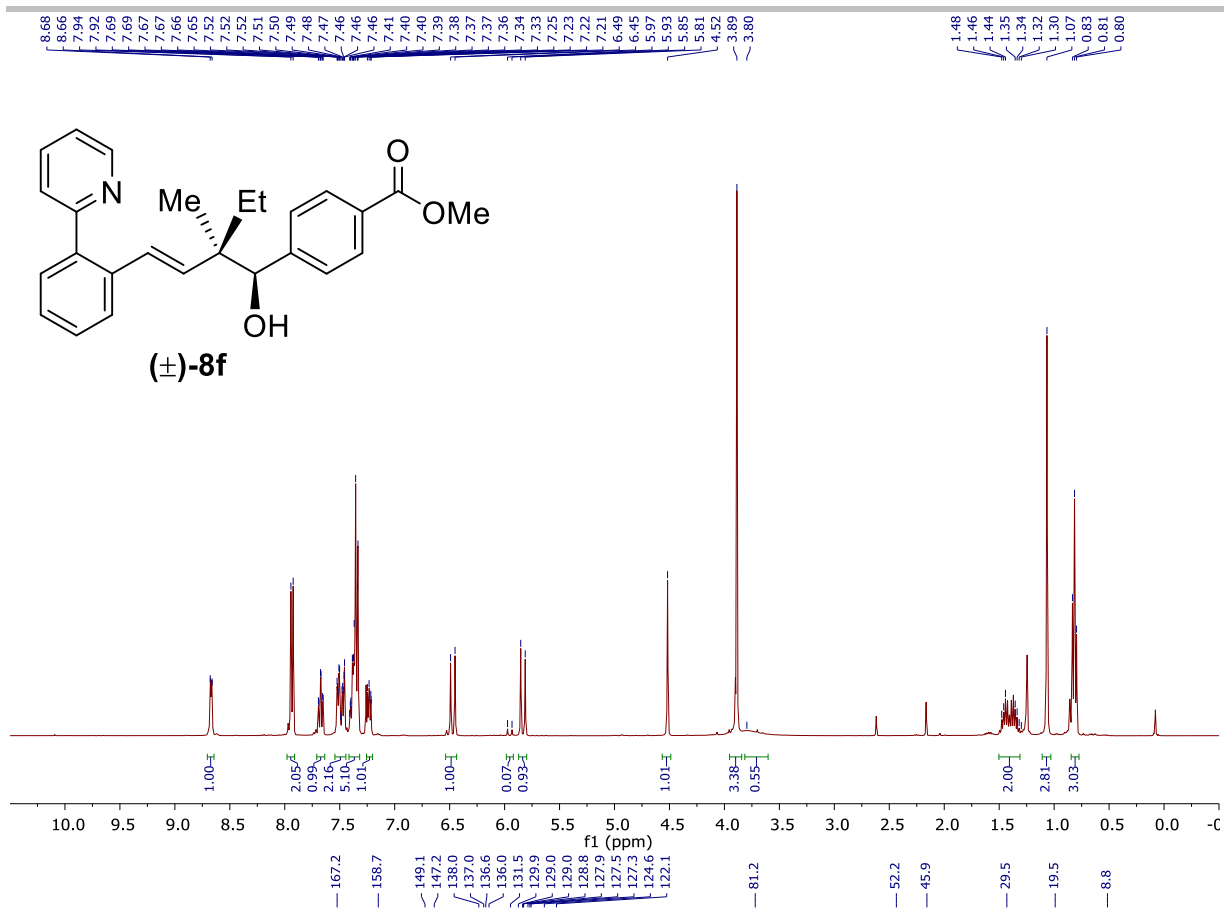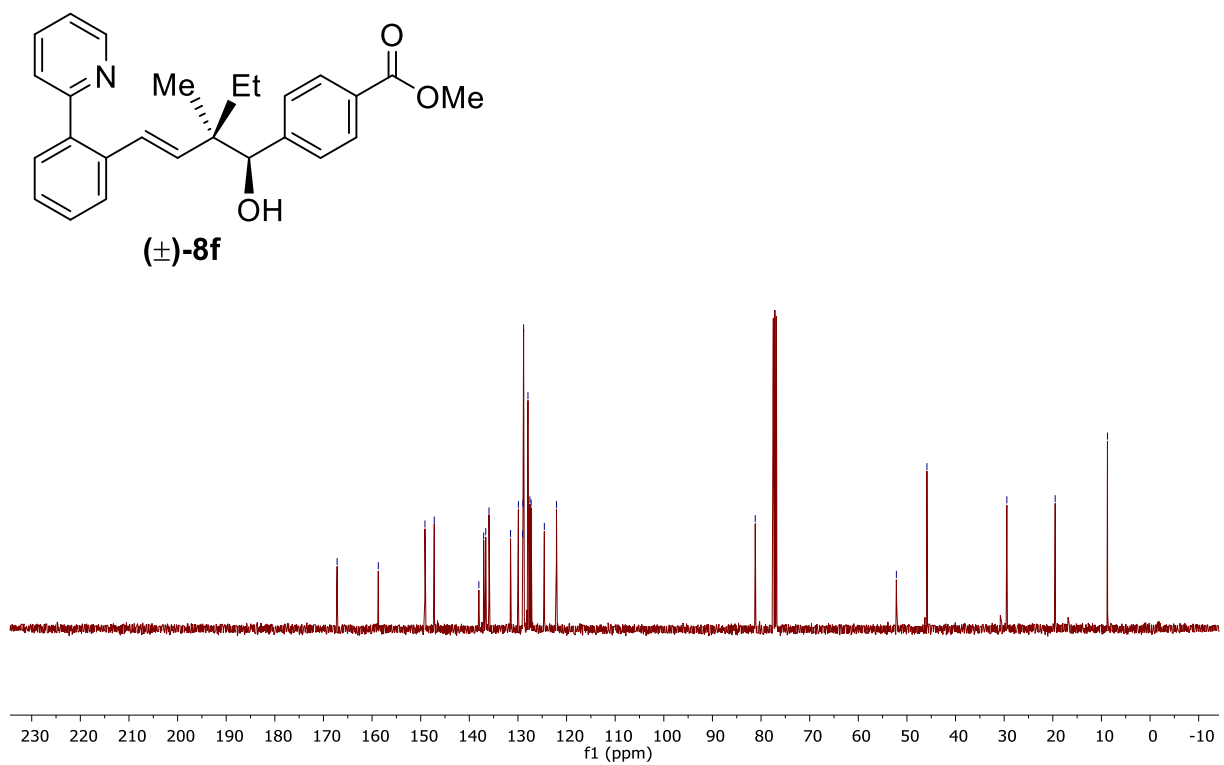

## SUPPORTING INFORMATION

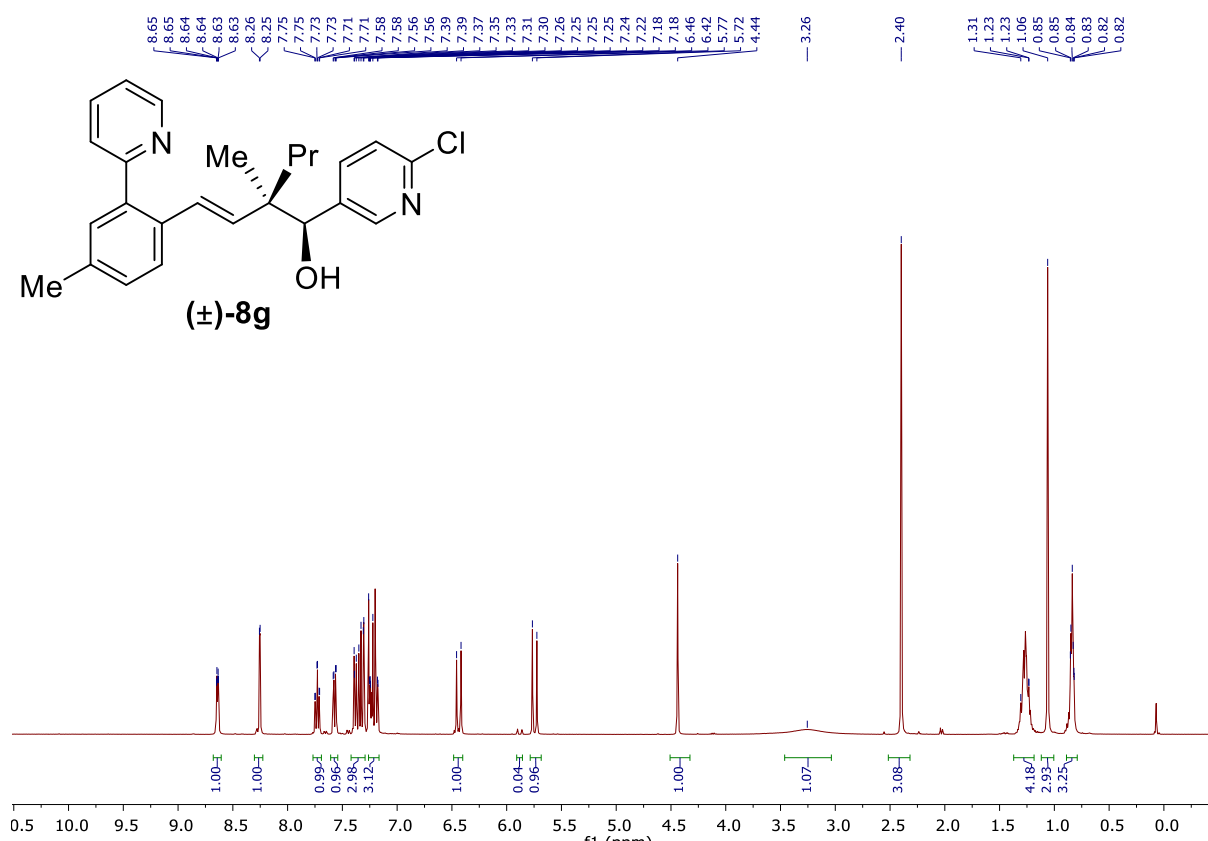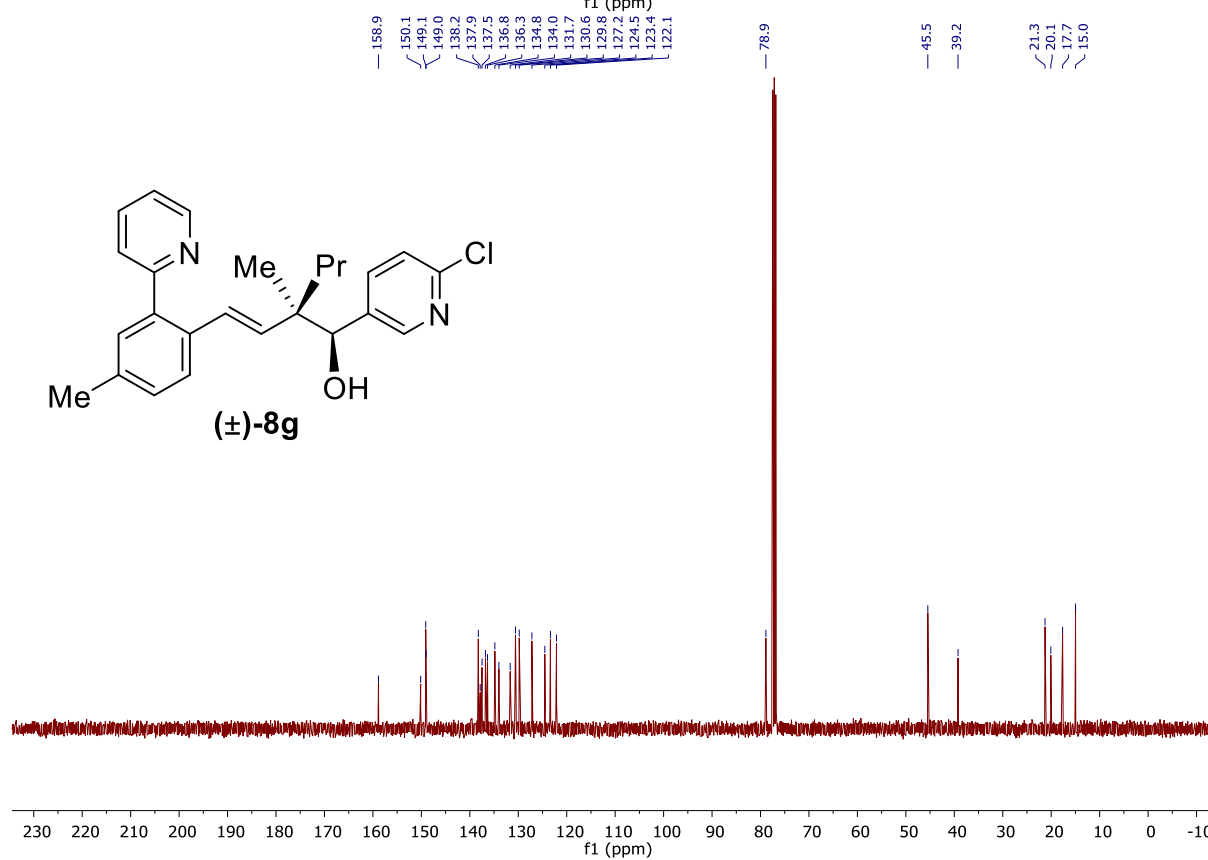

## SUPPORTING INFORMATION

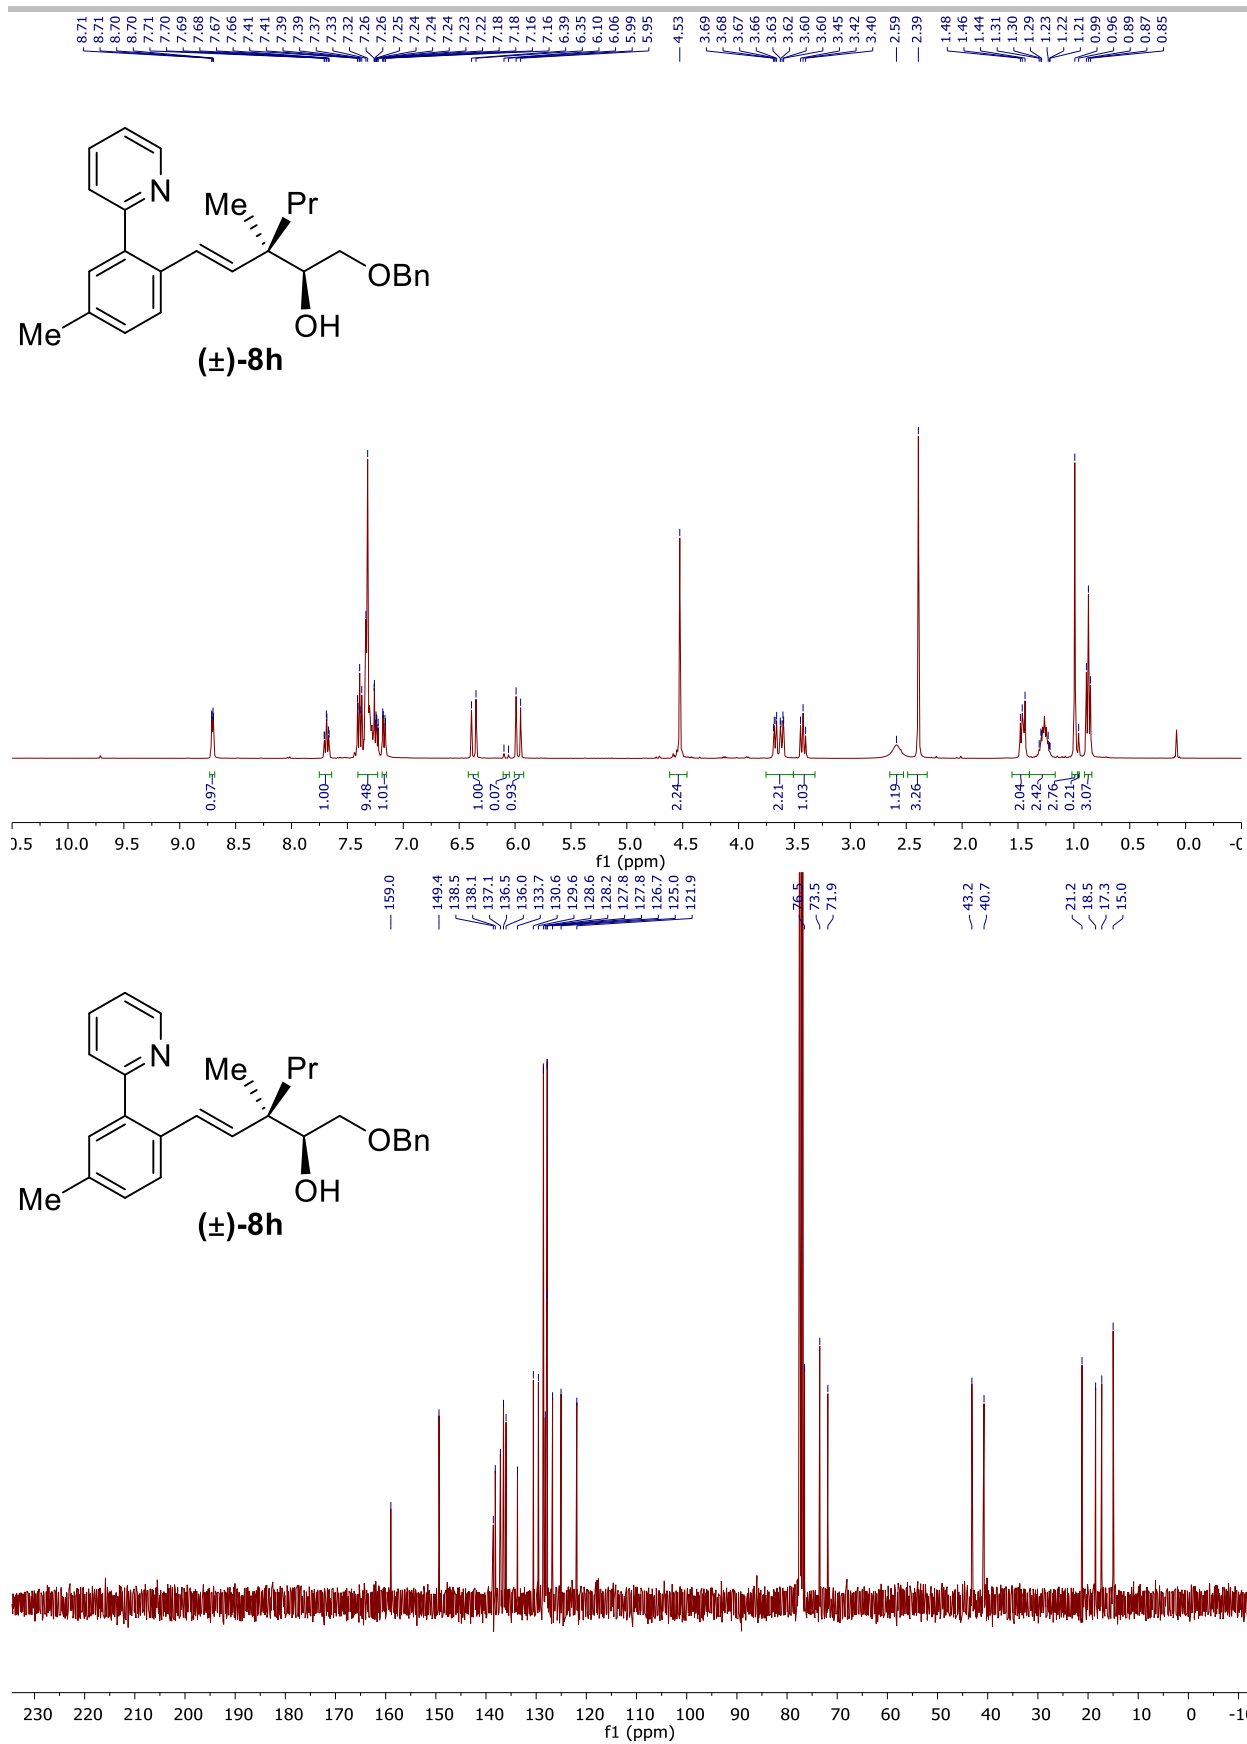

## SUPPORTING INFORMATION

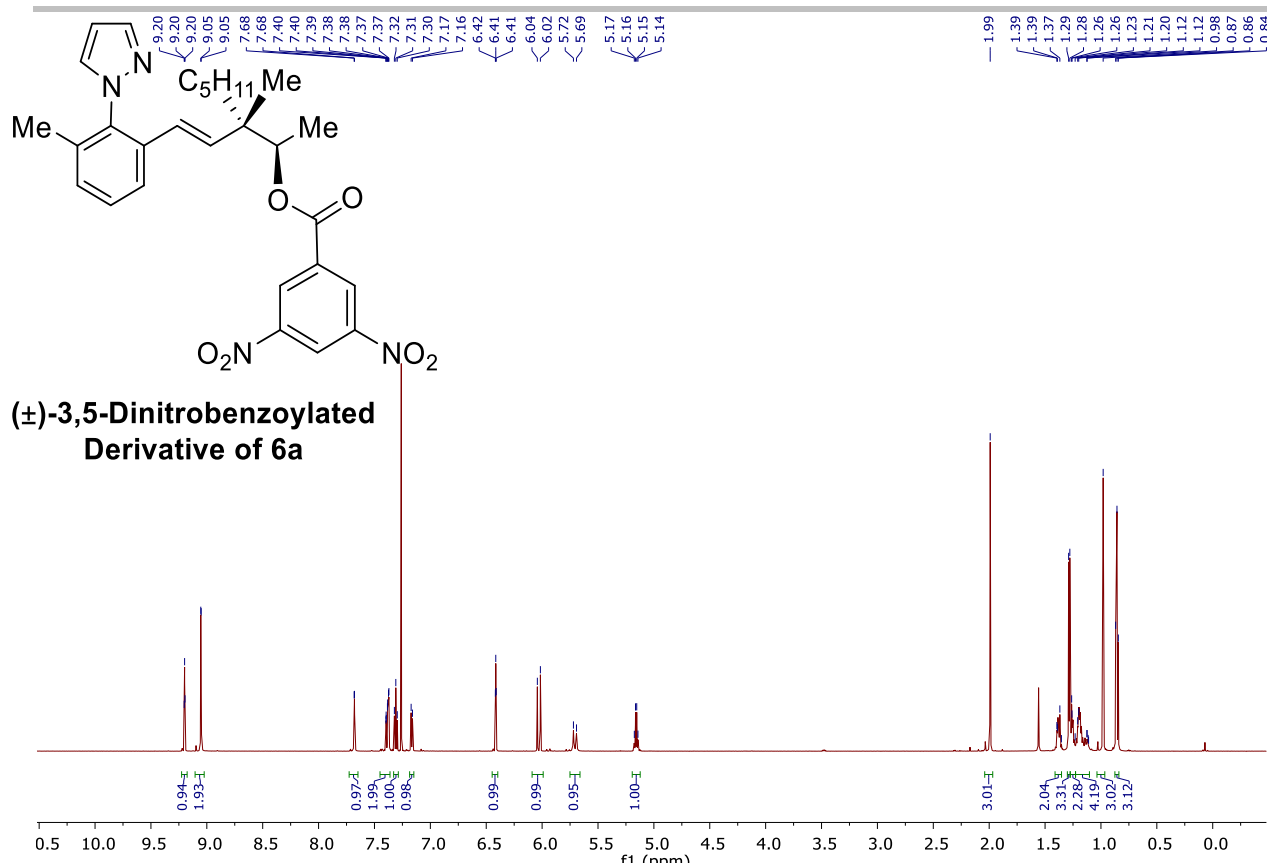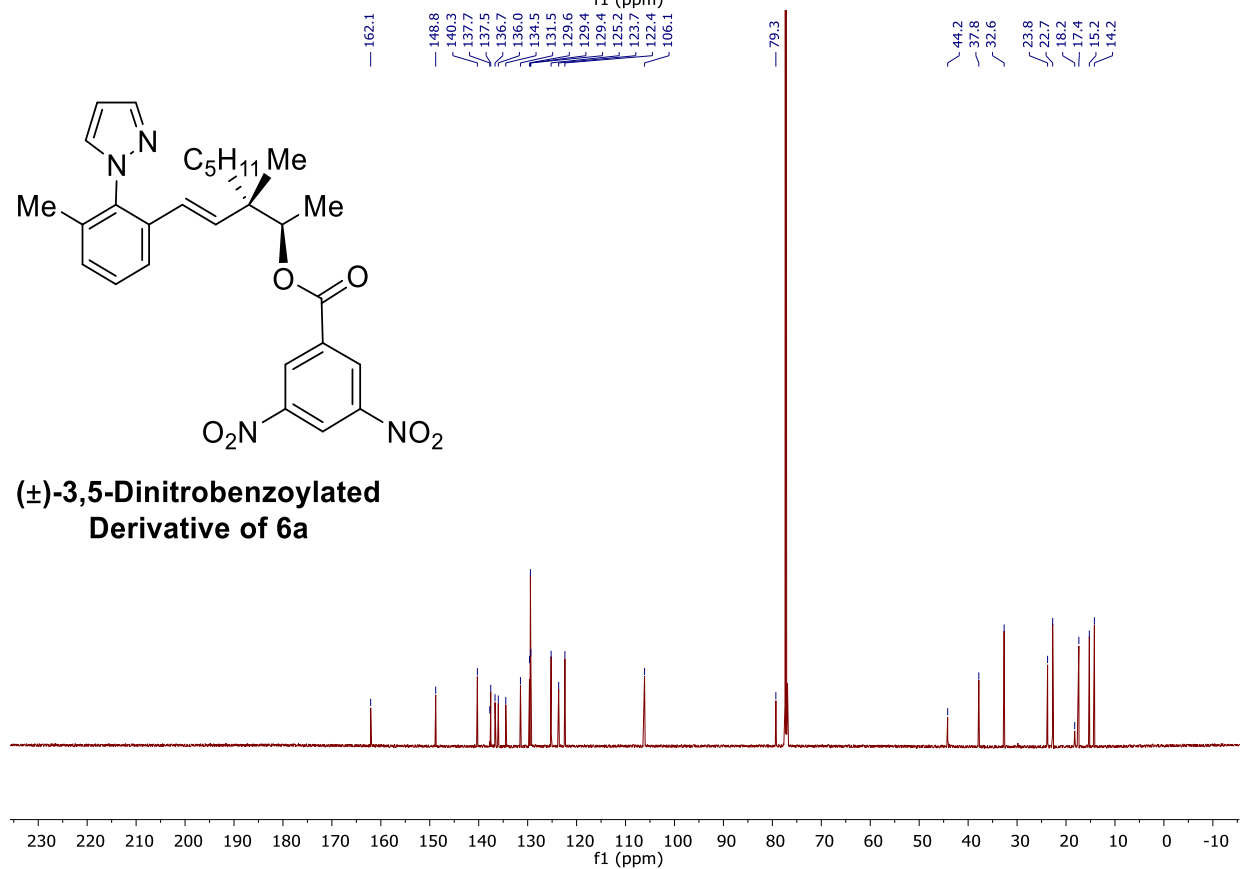

## SUPPORTING INFORMATION

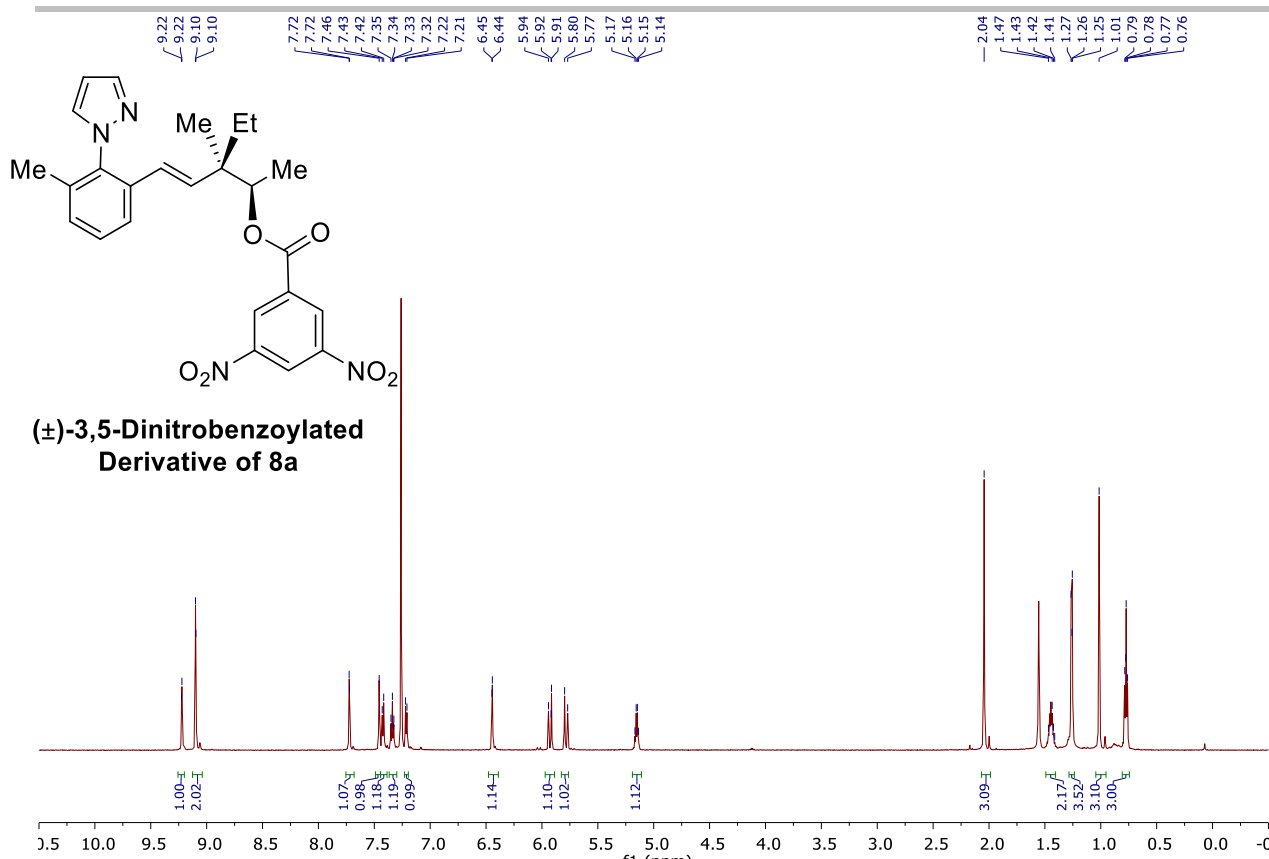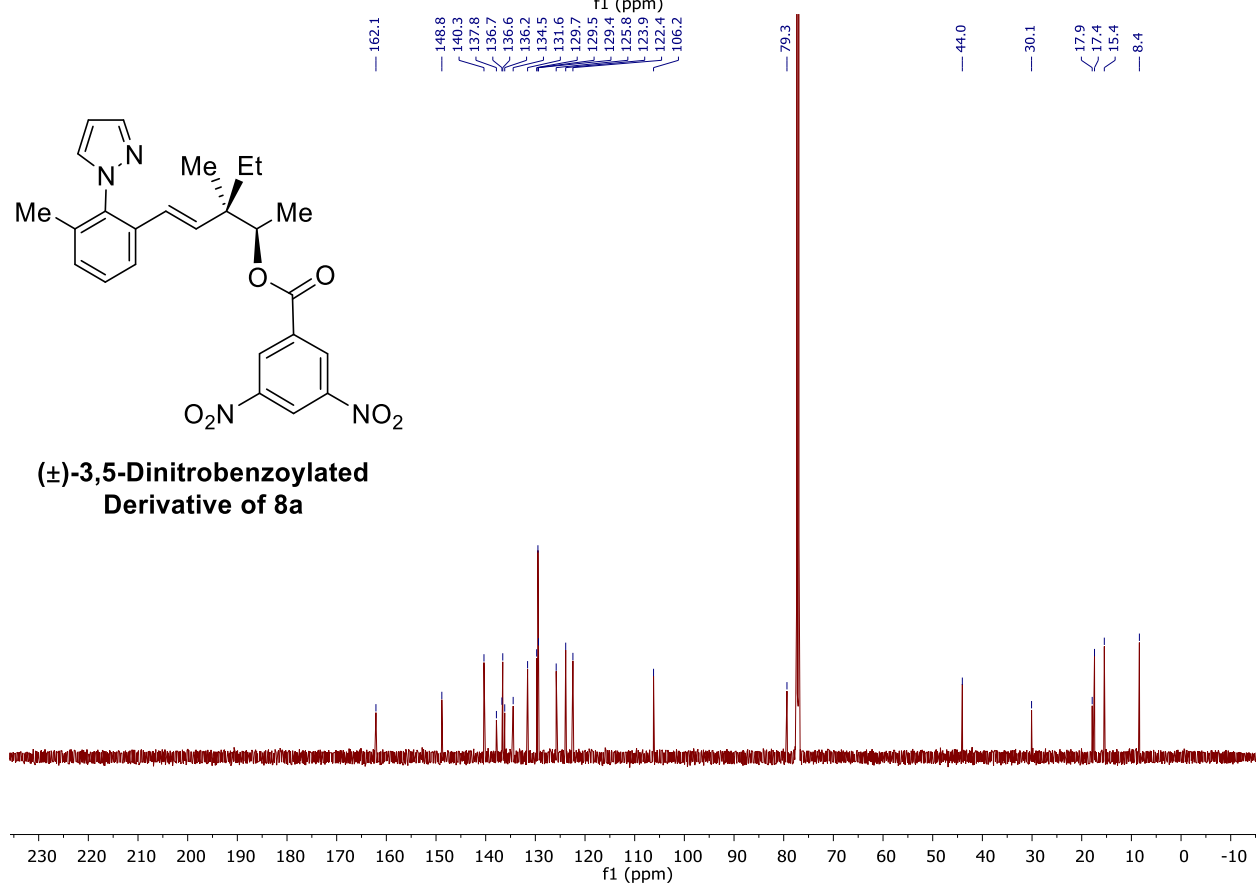

Supplement: NIHMS1042491-supplement-Supp_info.pdf [file NIHMS1042491-supplement-Supp_info.pdf]
